# Supplementary material for: Common responses of fish embryos to metals: an integrated analysis of transcriptomes and methylomes in zebrafish embryos under the stress of copper ions or silver nanoparticles
Source: Royal Society of Chemistry journal article supplement (doi:10.1039/c9mt00125e), 2019-08-13
Supplement: c9mt00125e2.xlsx [file c9mt00125e2.xlsx]

## Sheet: Sheet1
Supplementary Table 1: sequences of primer used in this study
Gene		Primer sequence(5'to3')						Product length(bp)		GenBank ID
atp2b3a		F: 5'-TCGCTGTTTATTCTTGGTTAGTG-3'						129		NM_001002472
		R: 5'-TTGAGGATGAATTACTGGCAAA-3'
ccbe1		F: 5'-CAGAAAGCAAAATCGCAACG-3'						116		NM_001163923
		R: 5'-AATACACTGACCCAGGACAAACT-3'
slc6a1a		F: 5'-TCTGCCACCTATCCATACTTCA-3'						180		NM_001045287
		R: 5'-GGAGCCTAGACCCAAACCGT-3'
nid1a		F: 5'-CAGCAAGATTTACATCAACACCA-3'						150		GW710913
		R: 5'-AACACCTTTCCTACACCGTCAC-3'
rbfox1		F: 5'-GGAACAGGGTAATCAAGACGC-3'						214		NM_001005596
		R: 5'-TGGTCCGCTGGGCTCACT-3'
rnpep		F: 5'-CGGGGCTTTCTTGTTCACT-3'						140		NM_001002741
		R: 5'-CCTGCTTGGCTGCCTGTA-3'
tpma		F: 5'-GAGACTCGTGCTGAGTTCGC-3'						115		NM_131105
		R: 5'-GCTCCTCGCTGATGGCTTT-3'
atp2b1b		F: 5'-ACGCTTGTGAGACGATGGG-3'						101		NM_001135631
		R: 5'-GCCTGCAATAAACACCTGAAC-3'
znf385b		F: 5'-ACCCAAATACAGCCCATACAA-3'						206		NM_212793
		R: 5'-GGAGAAACGAGTGCGGAAG-3'
ch25h		F: 5'-GGACTACAGCACATCTGGGACT-3'						181		NM_001008652
		R: 5'-CGCTGGCTTTCTGTTGGAT-3'
rrm2		F: 5'-ATTGAGTTTGTGGCTGACCG-3'						102		NM_131450
		R: 5'-GCCCTCCAACGAAATGTTC-3'
bsg		F: 5'-CTTCATAAAATCGCCTTTGTCTC-3'						113		NM_198142
		R: 5'-CGCCCTCAATAAACCACCACT-3'
dhx15		F: 5'-TCAAGGAAGTGGTCCGACAG-3'						104		NM_001115141
		R: 5'-CAGCAAGGGGCAGTTATCAA-3'
zfr2		F: 5'-ACATACGGACGACCACCCC-3'						173		BC122410
		R: 5'-GCCACCTGCCTTTGAACC-3'
nrm		F: 5'-GTGTCGTTTCGTGCCATCA-3'						117		NM_001045195
		R: 5'-ATCCACAGCCACTGCCTTC-3'
ldha		F: 5'-GGTTACACTTCTTGGGCTATTGG-3'						200		NM_131246
		R: 5'-TCTTCTGGTTTGAGGGTCATG-3'
esr2a		F: 5'-GCTGCTCACAAAGACAACAAGA-3'						132		NM_180966
		R: 5'-TGTCCATCCTCCCGAAACTA-3'
si:dkey-253d23.9		F: 5'-ATTTTCTTCTCCAACCACATAGC-3'						203		NM_001114487
		R: 5'-TTGTTTTCATTCAGCAGGTCTAA-3'
epas1b		F: 5'-GCTCACATTTGGATAAAGCGTC-3'						162		NM_001039806
		R: 5'-CCACTGTAATAAAGCCACCGA-3'
mespba		F: 5'-CGGCTTCATCCAGAGTCAAC-3'						117		NM_131552
		R: 5'-AGATCTTTCCGTCATCTCCAGT-3'
rcvrna		F: 5'-TATGGGGAATACTAAGAGTGGGG-3'						226		NM_001030248
		R: 5'-GGTGTCAAAGCTGCGGAAG-3'
casq1a		F: 5'-CCCGGAGTACGATGGAAAGG-3'						131		NM_001003620.2
		R: 5'-GTTTCTGGGCGACTTTGCTGT-3'
ryr1b		F: 5'-ATTACTCGGTTCGTATCTTCGC-3'						150		NM_001102571
		R: 5'-GTATGTTGCCTTTGTCGTCTCC-3'
masp2		F: 5'-AGAACGCAGAGAAGAACGAGATT-3'						109		NM_001122858
		R: 5'-TGAGCAGCGGTGAGAACCC-3'
syt9a		F: 5'-TCTCCCAGACCGCAAAACTA-3'						181		XM_001336022
		R: 5'-AACCACCACCTGCCCAATA-3'
mylz3		F: 5'-TCGTCCTCATGCAGTCAACC-3'						162		NM_131619
		R: 5'-ACAGCTAAGAGGTGCTGTCG-3'
mylpfa		F: 5'-TTTTCTTCCTCCCTTTCTTGC-3'						125		NM_131188
		R: 5'-CACTGTGGTCGTGTTCCTCTC-3'
bbox1		F: 5'-TGAGGGTGGTGAGAGTGAGGT-3'						201		NM_001017717
		R: 5'-CGACTGTGCGTGTGTAGGAGT-3'
egln3		F: 5'-GGTTGTCCCGGCTCTGTTG-3'						210		NM_213310
		R: 5'-GTTCCCCTCTCGGTCCCAT-3'
p4ha1b		F: 5'-GGATACACGAACGAGGTCAAGA-3'						181		NM_214691
		R: 5'-GGGCAGAAAGGCACAACAA-3'
cyp24a1		F: 5'-GATGATGGTGACGCCTGTTG-3'						107		NM_001089458
		R: 5'-CGATGTAATGTTTTGCTGTGCT-3'
p4ha2		F: 5'-ATCGCACGAGTCAATCAGAGAA-3'						174		NM_001007285
		R: 5'-AGCACCAAAGTCAGGGAAAAC-3'
18S		F: 5'-TCGCTAGTTGGCATCGTTTATG-3'
		R: 5'-CGGAGGTTCGAAGACGATCA-3'
Supplementary Table 2: sequences of primer used in this study
Gene		Primer sequence(5'to3')						Product length(bp)
rrm2(Cu ions)		F(outter): 5'-TGTTATTTGGATTATTATTGGTTTGAAAAAGTT-3'						644
		R(outter): 5'-CAAAACTTTATTTTATTTCCTCAACAACACAT-3'
		F(inner): 5'-TGGTTGTATAATAGATGGTTTTATTATTGTGT-3'						194
		R(inner): 5'-AAACAATAATTTTATCCCTTCCTATTTTCAAT-3'
rrm2(AgNPs)		F(outter): 5'- ATATTGTAGTTTAGTGGTAGGAGGATAA-3'						605
		R(outter): 5'-ACCATTAACTAATAATTCAAATCTT-3'
		F(inner): 5'-ATGTTTTATGTTAAGAGTTGAATTA-3'						281
		R(inner): 5'-CAATAATCATTCAATCAATTTTTAT-3'
Supplementary Table 3: 3388 down-regulated genes in Cu ions exposed embryos
# Condition pairs: Cu ions-24h vs control-24h # Fold Change cut-off: 2.0 # Column A: ProbeName, it represents probe name. # Column B: Fold Change, positive value indicates up-regulation and negative value indicates down-regulation. # Column C: Log Fold Change, log2 value of absolute fold change. Positive value indicates up-regulation and negative value indicates down-regulation. # Column D: Absol…
Cu-24h-1 vs control-24h 2.0 fold down regulated genes
	Fold Change and Regulation				Annotations											Raw Intensities		Normalized Intensities
ProbeName	Fold change([Cu-24h-1] vs [control-24h])	Log Fold change([Cu-24h-1] vs [control-24h])	Absolute Fold change([Cu-24h-1] vs [control-24h])	Regulation([Cu-24h-1] vs [control-24h])	GenbankAccession	GenomicCoordinates	GeneSymbol	Description	Go	RefSeqAccession	UniGeneID	EntrezGeneID	EnsemblID	GeneName	TIGRID	[Cu ions-24h-1](raw)	[control-24h](raw)	[Cu- ions24h-1](normalized)	[control-24h](normalized)
A_15_P488890	-2.61772	-1.38831	2.61772	down	XM_001339475	chr6:38311986-38311927	gabra5	gamma-aminobutyric acid (GABA) A receptor, alpha 5 [Source:ZFIN;Acc:ZDB-GENE-081104-30] [ENSDART00000144106]	GO:0005230|GO:0030054|GO:0016020|GO:0005886|GO:0004890|GO:0045211|GO:0006810|GO:0045202|GO:0016021|GO:0005216|GO:0006811	XM_001339475		799124	ENSDART00000144106	gamma-aminobutyric acid (GABA) A receptor, alpha 5	TC393856	11.9119	69.3331	4.05191	5.44022
A_15_P197111	-2.65835	-1.41053	2.65835	down	NM_001082551	chr13:12888173-12888004	whsc1	Danio rerio Wolf-Hirschhorn syndrome candidate 1 (whsc1), mRNA [NM_001082551]	GO:0051216|GO:0010452|GO:0008168|GO:0048706|GO:0008270|GO:0005634|GO:0032259|GO:0046872|GO:0016740|GO:0018024	NM_001082551	Dr.78031	100000709	ENSDART00000131150	Wolf-Hirschhorn syndrome candidate 1	TC382514	39.3093	246.08	5.78316	7.19369
A_15_P480345	-2.20103	-1.13818	2.20103	down	XM_693459	chr21:12904298-12904239	arrdc1b	arrestin domain containing 1b [Source:ZFIN;Acc:ZDB-GENE-080515-2] [ENSDART00000114096]		XM_693459		570029	ENSDART00000114096	arrestin domain containing 1b		17.1439	84.9494	4.57707	5.71525
A_15_P705404	-2.89674	-1.53443	2.89674	down	XM_001919304	chr21:14102158-14102216	fam169ab	family with sequence similarity 169, member Ab [Source:ZFIN;Acc:ZDB-GENE-091118-95] [ENSDART00000124807]		XM_001919304	Dr.84572	553309	ENSDART00000124807	family with sequence similarity 169, member Ab	NP13326132	18.6741	123.682	4.71027	6.2447
A_15_P544352	-2.21448	-1.14697	2.21448	down	NM_213229	chr24:25636367-25636308	nupl1	Danio rerio nucleoporin like 1 (nupl1), mRNA [NM_213229]	GO:0005643|GO:0006913	NM_213229	Dr.32947	406510	ENSDART00000122997	nucleoporin like 1	TC402840	352.363	1606.86	8.77887	9.92584
A_15_P720116	-2.87555	-1.52384	2.87555	down	NM_001020774	chr8:30488956-30489015	smarcad1	Danio rerio SWI/SNF-related, matrix-associated actin-dependent regulator of chromatin, subfamily a, containing DEAD/H box 1 (smarcad1), mRNA [NM_001020774]		NM_001020774	Dr.3950	557875	ENSDART00000139029	SWI/SNF-related, matrix-associated actin-dependent regulator of chromatin, subfamily a, containing DEAD/H box 1	TC453361	168.204	1072.51	7.80523	9.32907
A_15_P628761	-2.71626	-1.44162	2.71626	down	NM_201039	chr14:280004-280063	wdr1	Danio rerio WD repeat domain 1 (wdr1), mRNA [NM_201039]		NM_201039	Dr.121487	394014		WD repeat domain 1	TC376777	251.02	1461.97	8.3436	9.78522
A_15_P204741	-2.37498	-1.24792	2.37498	down	NM_213458	Zv9_scaffold3563:201023-199293	sh3bp5b	Danio rerio SH3-domain binding protein 5b (BTK-associated) (sh3bp5b), mRNA [NM_213458]	GO:0005575	NM_213458	Dr.78598	406767	ENSDART00000012414	SH3-domain binding protein 5b (BTK-associated)	TC391818	66.093	367.712	6.51628	7.76419
A_15_P556119	-11.0788	-3.46972	11.0788	down	DT079669	Zv9_scaffold3465:93418-93359		Uncharacterized protein [Source:UniProtKB/TrEMBL;Acc:H9GYY1] [ENSDART00000123486]		XM_005174391	Dr.109913		ENSDART00000123486		TC424041	5	95.4893	2.40516	5.87489
A_15_P493102	-2.26889	-1.18199	2.26889	down	NM_001122858	chr23:29024747-29028643	masp2	Danio rerio mannan-binding lectin serine peptidase 2 (masp2), mRNA [NM_001122858]	GO:0006956|GO:0016787|GO:0004252|GO:0005509|GO:0006508|GO:0008233|GO:0005576|GO:0003824	NM_001122858	Dr.77212	560277	ENSDART00000035290	mannan-binding lectin serine peptidase 2	TC421257	33.2201	173.714	5.53676	6.71875
A_15_P550292	-2.36836	-1.24389	2.36836	down	NM_001077461	chr10:38480298-38480357	cuedc1a	Danio rerio CUE domain containing 1a (cuedc1a), mRNA [NM_001077461]	GO:0008150|GO:0003674|GO:0005575	NM_001077461	Dr.82732	768297	ENSDART00000114909	CUE domain containing 1a	TC368838	8.40484	44.6786	3.55512	4.79901
A_15_P744611	-2.42912	-1.28043	2.42912	down	NM_199993	chr20:54587852-54587793	arf6a	Danio rerio ADP-ribosylation factor 6a (arf6a), mRNA [NM_199993]		NM_199993	Dr.105520	336063	ENSDART00000114679	ADP-ribosylation factor 6a	TC390110	1004.94	4243.47	10.1344	11.4148
A_15_P143156	-2.91442	-1.54321	2.91442	down	NM_001030125	chr12:35975027-35975086	camk2g1	Danio rerio calcium/calmodulin-dependent protein kinase (CaM kinase) II gamma 1 (camk2g1), mRNA [NM_001030125]	GO:0005516|GO:0048793|GO:0005575|GO:0005524|GO:0016310|GO:0046777|GO:0004672|GO:0000166|GO:0003146|GO:0004674|GO:0016301|GO:0006468|GO:0004683|GO:0016740|GO:0016772	NM_001030125	Dr.90586	791855	ENSDART00000105518	calcium/calmodulin-dependent protein kinase (CaM kinase) II gamma 1	TC427669	437.497	2511.24	9.0715	10.6147
A_15_P672996	-2.04774	-1.03404	2.04774	down		chr1:22352972-22352913		Rep: Ligand-dependent nuclear receptor corepressor-like protein - Gallus gallus (Chicken), partial (24%) [TC382971]							TC382971	84.6236	405.376	6.86213	7.89617
A_15_P766001	-2.11625	-1.08151	2.11625	down	NM_182866	chr6:19953224-19953283	glulb	Danio rerio glutamate-ammonia ligase (glutamine synthase) b (glulb), mRNA [NM_182866]	GO:0006807|GO:0004356|GO:0016874|GO:0003824|GO:0006542	NM_182866	Dr.75165	336473	ENSDART00000150194	glutamate-ammonia ligase (glutamine synthase) b	TC398670	4949.76	15473.4	12.2341	13.3157
A_15_P705266	-2.19719	-1.13566	2.19719	down	NM_201084	chr17:4840776-4842949	cdc5l	Danio rerio CDC5 cell division cycle 5-like (S. pombe) (cdc5l), mRNA [NM_201084]	GO:0007049|GO:0003682|GO:0003677|GO:0051301	NM_201084	Dr.10661	394059	ENSDART00000121806	CDC5 cell division cycle 5-like (S. pombe)	TC446676	103.091	520.419	7.13285	8.26851
A_15_P634714	-2.15729	-1.10922	2.15729	down	NM_001020741	chr12:22000921-22000980	calcoco2	Danio rerio calcium binding and coiled-coil domain 2 (calcoco2), mRNA [NM_001020741]		NM_001020741	Dr.117434	553776	ENSDART00000074379	calcium binding and coiled-coil domain 2	TC411776	5	18.9159	2.40516	3.51438
A_15_P655961	-2.17834	-1.12323	2.17834	down	NM_152972	chr10:16081098-16081157	lmnb1	Danio rerio lamin B1 (lmnb1), mRNA [NM_152972]	GO:0005882|GO:0005198	NM_152972	Dr.25051	195816	ENSDART00000065037	lamin B1	TC367038	2210.98	7580.82	11.1554	12.2787
A_15_P719146	-2.5036	-1.32401	2.5036	down	NM_001123307	chr9:22331191-22331250	lats2	Danio rerio LATS, large tumor suppressor, homolog 2 (Drosophila) (lats2), transcript variant 1, mRNA [NM_001123307]	GO:0060027|GO:0004672|GO:0000166|GO:0004674|GO:0006468|GO:0005524|GO:0016772	NM_001123307	Dr.84188	567674	ENSDART00000111899	LATS, large tumor suppressor, homolog 2 (Drosophila)	TC366141	26.8676	156.358	5.24128	6.56529
A_15_P659196	-3.19552	-1.67605	3.19552	down	NM_001020608	chr23:26352588-26352529	gdi1	Danio rerio GDP dissociation inhibitor 1 (gdi1), mRNA [NM_001020608]	GO:0005093|GO:0015031	NM_001020608	Dr.18113	554985	ENSDART00000063388	GDP dissociation inhibitor 1	TC393606	189.431	1320.63	7.96507	9.64112
A_15_P156791	-2.52842	-1.33823	2.52842	down	NM_199870	chr24:24897046-24897105	ythdf3	Danio rerio YTH domain family 3 (ythdf3), mRNA [NM_199870]		NM_199870	Dr.80669	334191	ENSDART00000122294	YTH domain family 3	TC441437	234.4	1273.02	8.24884	9.58707
A_15_P633516	-2.70768	-1.43706	2.70768	down	NM_001076584	chr3:33038989-33038930	zgc:154037	Danio rerio zgc:154037 (zgc:154037), mRNA [NM_001076584]	GO:0016747|GO:0006355|GO:0003700|GO:0008270|GO:0005634	NM_001076584	Dr.114406	767644	ENSDART00000083874	zgc:154037	TC410577	6.31145	38.1356	3.13043	4.56749
A_15_P181261	-2.01316	-1.00946	2.01316	down	XM_693187	chr21:39677950-39677891	larsb	leucyl-tRNA synthetase b [Source:ZFIN;Acc:ZDB-GENE-030114-7] [ENSDART00000026064]	GO:0002161|GO:0000166|GO:0005524|GO:0004812|GO:0006418	XM_693187		569778	ENSDART00000026064	leucyl-tRNA synthetase b	TC384141	4326.3	12949.6	12.0476	13.0571
A_15_P202581	-2.41708	-1.27327	2.41708	down	XM_689665	chr17:11311576-11311517	adpgk2	ADP-dependent glucokinase 2 [Source:ZFIN;Acc:ZDB-GENE-090609-3] [ENSDART00000091159]	GO:0005975|GO:0016773	XM_689665		566398	ENSDART00000091159	ADP-dependent glucokinase 2	NP13324507	124.797	683.879	7.39707	8.67034
A_15_P584742	-6.29921	-2.65517	6.29921	down		chr13:045631190-045631131		Rep: Flagellar basal body rod modification protein D - Bacillus sp. SG-1, partial (8%) [TC436382]							TC436382	40.6146	604.531	5.82778	8.48295
A_15_P242711	-3.87743	-1.9551	3.87743	down		chr21:43888043-43887984		Rep: Interleukin 23 receptor - Danio rerio (Zebrafish) (Brachydanio rerio), partial (7%) [TC438669]							TC382458	20.7362	186.266	4.85673	6.81183
A_15_P749851	-2.57224	-1.36303	2.57224	down	NM_001015057	chr2:16592494-16592435	tfa	Danio rerio transferrin-a (tfa), mRNA [NM_001015057]	GO:0006879|GO:0009617|GO:0006826|GO:0005576|GO:0008199	NM_001015057	Dr.75658	30255	ENSDART00000127207	transferrin-a	TC407289	5818.33	21481.8	12.4572	13.8202
A_15_P162921	-2.42884	-1.28027	2.42884	down	NM_001083812	chr21:10188522-10190461	ell2	Danio rerio elongation factor, RNA polymerase II, 2 (ell2), mRNA [NM_001083812]	GO:0006368|GO:0008023	NM_001083812	Dr.77474	322997	ENSDART00000102404	elongation factor, RNA polymerase II, 2	TC375517	40.8473	232.541	5.83641	7.11667
A_15_P216966	-2.00939	-1.00676	2.00939	down	NM_212683	chr20:22263616-22263557	tmem165	Danio rerio transmembrane protein 165 (tmem165), mRNA [NM_212683]	GO:0016020|GO:0016021	NM_212683	Dr.161761	324501	ENSDART00000047624	transmembrane protein 165	TC382318	407.199	1664.71	8.97462	9.98138
A_15_P757861	-3.20925	-1.68224	3.20925	down		chr6:24489038-24488979		GB							NP13319556	6.68716	47.6752	3.20834	4.89057
A_15_P565462	-3.08741	-1.6264	3.08741	down	NM_213124	chr6:10982144-10982086	sumo3a	Danio rerio SMT3 suppressor of mif two 3 homolog 3a (sumo3a), mRNA [NM_213124]	GO:0003674|GO:0005737|GO:0016925|GO:0005634|GO:0009790	NM_213124	Dr.1291	406398	ENSDART00000143730	SMT3 suppressor of mif two 3 homolog 3a	TC421411	6600.56	29008.8	12.6299	14.2563
A_15_P722586	-2.15772	-1.10951	2.15772	down	NM_001161375	chr17:45900252-45900193	arf6b	Danio rerio ADP-ribosylation factor 6b (arf6b), mRNA [NM_001161375]	GO:0005622|GO:0000166|GO:0007264|GO:0055113|GO:0005525	NM_001161375	Dr.76362	100003206	ENSDART00000074873	ADP-ribosylation factor 6b	TC455066	3860.66	12515.9	11.897	13.0065
A_15_P740236	-3.35118	-1.74467	3.35118	down	NM_001100006	chr5:41917215-41917156	snx18a	Danio rerio sorting nexin 18a (snx18a), mRNA [NM_001100006]	GO:0007154|GO:0035091	NM_001100006	Dr.62003	562372	ENSDART00000097525	sorting nexin 18a	TC372030	54.4893	429.916	6.23925	7.98392
A_15_P101072	-2.2363	-1.16111	2.2363	down	NM_001044813	chr4:24846553-24846494	tmcc3	Danio rerio transmembrane and coiled-coil domain family 3 (tmcc3), mRNA [NM_001044813]	GO:0016020|GO:0016021	NM_001044813	Dr.77404	556763	ENSDART00000066946	transmembrane and coiled-coil domain family 3	TC410380	51.8509	271.654	6.17351	7.33462
A_15_P378860	-3.92659	-1.97328	3.92659	down	NM_001014296	chr5:72059363-72059304	mat2ab	Danio rerio methionine adenosyltransferase II, alpha b (mat2ab), mRNA [NM_001014296]	GO:0000166|GO:0006556|GO:0005575|GO:0006730|GO:0005524|GO:0004478|GO:0046872|GO:0016740	NM_001014296	Dr.115160	791612		methionine adenosyltransferase II, alpha b	TC407575	71.224	649.865	6.62046	8.59373
A_15_P482875	-8.94301	-3.16076	8.94301	down	NM_201465	chr2:55852097-55852156	calrl	Danio rerio calreticulin like (calrl), mRNA [NM_201465]	GO:0006457|GO:0005783|GO:0005509|GO:0051082	NM_201465	Dr.105519	321315	ENSDART00000025570	calreticulin like	TC433874	65.2515	1335.51	6.49766	9.65842
A_15_P484200	-2.93555	-1.55363	2.93555	down	NM_001130694	chr6:43009403-43009344	lrrn1	Danio rerio leucine rich repeat neuronal 1 (lrrn1), mRNA [NM_001130694]	GO:0005515|GO:0016020	NM_001130694	Dr.29133	568527	ENSDART00000084389	leucine rich repeat neuronal 1	TC430661	3810.75	16738.3	11.8788	13.4324
A_15_P158146	-2.01675	-1.01203	2.01675	down	CO934618	chr10:35974911-35974970		si:ch211-170h2.3 [Source:ZFIN;Acc:ZDB-GENE-091204-180] [ENSDART00000063472]		XM_001344969	Dr.116765		ENSDART00000063472		TC433289	18.3906	83.8727	4.68389	5.69592
A_15_P621013	-2.223	-1.15251	2.223	down	NM_001082934	chr12:22049171-22049230	st6galnac1.2	Danio rerio ST6 (alpha-N-acetyl-neuraminyl-2,3-beta-galactosyl-1,3)-N-acetylgalactosaminide alpha-2,6-sialyltransferase 1, tandem duplicate 2 (st6galnac1.2), mRNA [NM_001082934]	GO:0030173|GO:0008373|GO:0005794|GO:0016020|GO:0016757|GO:0006486|GO:0016021|GO:0016740	NM_001082934	Dr.83479	799868	ENSDART00000112847	ST6 (alpha-N-acetyl-neuraminyl-2,3-beta-galactosyl-1,3)-N-acetylgalactosaminide alpha-2,6-sialyltransferase 1, tandem duplicate 2	TC416240	20.0733	101.35	4.81024	5.96275
A_15_P142720	-3.51461	-1.81336	3.51461	down	NM_001082898	chr20:46167261-46167320	taar10a	Danio rerio trace amine-associated receptor 10a (taar10a), mRNA [NM_001082898]	GO:0007165|GO:0016020|GO:0007186|GO:0004930|GO:0016021|GO:0004871|GO:0001594	NM_001082898	Dr.140240	794359	ENSDART00000132026	trace amine-associated receptor 10a	TC376789	9.53835	75.499	3.74429	5.55766
A_15_P293511	-3.60358	-1.84943	3.60358	down	NM_131024	chr17:51747306-51743434	psen1	Danio rerio presenilin 1 (psen1), mRNA [NM_131024]	GO:0030424|GO:0048471|GO:0030018|GO:0031594|GO:0007220|GO:0005783|GO:0005743|GO:0031224|GO:0005634|GO:0005765|GO:0030426|GO:0035556|GO:0005739|GO:0001946|GO:0016324|GO:0051563|GO:0007219|GO:0043198|GO:0016485|GO:0043025|GO:0006508|GO:0006816|GO:0006509|GO:0060070|GO:0005938|GO:0045296|GO:0005794|GO:0009986|GO:0030318|GO:0043085|GO:0034205|GO:0061053|GO:0016787|GO:0004175|GO:0000139|GO:0016020|GO:…	NM_131024	Dr.75852	30221	ENSDART00000150089	presenilin 1	TC436968	67.4347	566.373	6.54617	8.3956
A_15_P152226	-2.61021	-1.38416	2.61021	down	NM_198210	chr4:8905153-8905296	hsp90b1	Danio rerio heat shock protein 90, beta (grp94), member 1 (hsp90b1), mRNA [NM_198210]	GO:0006457|GO:0006950|GO:0035889|GO:0051082|GO:0005524	NM_198210	Dr.76602	386590	ENSDART00000004879	heat shock protein 90, beta (grp94), member 1	TC414641	3135.91	12473.6	11.618	13.0022
A_15_P152936	-8.55996	-3.0976	8.55996	down	NM_001032366	chr20:23193876-23193817	dcun1d4	Danio rerio DCN1, defective in cullin neddylation 1, domain containing 4 (S. cerevisiae) (dcun1d4), mRNA [NM_001032366]		NM_001032366	Dr.119674	556765	ENSDART00000142721	DCN1, defective in cullin neddylation 1, domain containing 4 (S. cerevisiae)	NP1365243	6.61731	127.792	3.19471	6.29231
A_15_P280726	-2.57342	-1.36369	2.57342	down	NM_201501	chr3:17284474-17291120	rab5c	Danio rerio RAB5C, member RAS oncogene family (rab5c), mRNA [NM_201501]	GO:0005515|GO:0016337|GO:0000166|GO:0030100|GO:0007264|GO:0001525|GO:0015031|GO:0005525|GO:0005769|GO:0001702|GO:0005768	NM_201501	Dr.5030	386807	ENSDART00000034536	RAB5C, member RAS oncogene family	NP13226131	240.62	1329.83	8.28878	9.65246
A_15_P305011	-2.41276	-1.27068	2.41276	down	NM_182859	chr16:16691796-16684551	crabp2a	Danio rerio cellular retinoic acid binding protein 2, a (crabp2a), mRNA [NM_182859]	GO:0005215|GO:0006810|GO:0008289	NM_182859	Dr.104443	171480	ENSDART00000113913	cellular retinoic acid binding protein 2, a	NP13226064	306.42	1555.3	8.60434	9.87503
A_15_P597302	-2.8139	-1.49257	2.8139	down	XM_684679	chr16:18093699-18093640	ankib1	ankyrin repeat and IBR domain containing 1b [Source:ZFIN;Acc:ZDB-GENE-100920-6] [ENSDART00000112288]		XM_684679		561277	ENSDART00000112288	ankyrin repeat and IBR domain containing 1	TC402158	26.6622	173.716	5.2264	6.71897
A_15_P755393	-2.14931	-1.10387	2.14931	down	NM_212609	chr8:55176173-55176114	gnb1a	Danio rerio guanine nucleotide binding protein (G protein), beta polypeptide 1a (gnb1a), mRNA [NM_212609]	GO:0007165|GO:0004871	NM_212609	Dr.75526	322104		guanine nucleotide binding protein (G protein), beta polypeptide 1a	TC428954	2374.11	7957.4	11.2486	12.3525
A_15_P639546	-6.07659	-2.60326	6.07659	down	NM_001197329	chr15:4464982-4461497	eif4h	Danio rerio eukaryotic translation initiation factor 4h (eif4h), transcript variant 3, mRNA [NM_001197329]	GO:0000166|GO:0003676	NM_001197329	Dr.76638	402996	ENSDART00000108626	eukaryotic translation initiation factor 4h	TC431903	309.824	3723.47	8.61861	11.2219
A_15_P236171	-2.93427	-1.553	2.93427	down	BG738103	chr10:23199684-23199625		Uncharacterized protein [Source:UniProtKB/TrEMBL;Acc:E7EZL8] [ENSDART00000079714]		XM_005155266	Dr.82757		ENSDART00000079714		TC417127	7.73098	50.3833	3.42495	4.97795
A_15_P417262	-3.40481	-1.76757	3.40481	down	NM_001045105	chr8:19074225-19074284	tab3	Danio rerio TGF-beta activated kinase 1/MAP3K7 binding protein 3 (tab3), mRNA [NM_001045105]	GO:0016310|GO:0016301|GO:0008270|GO:0016740	NM_001045105	Dr.82674	566547	ENSDART00000148806	TGF-beta activated kinase 1/MAP3K7 binding protein 3	TC407408	26.2855	210.31	5.20669	6.97427
A_15_P115987	-4.9293	-2.30138	4.9293	down	XM_680210	chr13:27434002-27434061	slc24a3	solute carrier family 24 (sodium/potassium/calcium exchanger), member 3 [Source:ZFIN;Acc:ZDB-GENE-090312-67] [ENSDART00000022110]	GO:0016020|GO:0016021|GO:0055085	XM_680210		557196	ENSDART00000022110	solute carrier family 24 (sodium/potassium/calcium exchanger), member 3	TC382219	5	41.8125	2.40516	4.70655
A_15_P148181	-8.93128	-3.15887	8.93128	down	NM_001135121	chr1:37141798-37141857	dclk2	Danio rerio doublecortin-like kinase 2 (dclk2), transcript variant 1, mRNA [NM_001135121]	GO:0005524|GO:0008021|GO:0035556|GO:0016310|GO:0005737|GO:0046777|GO:0004672|GO:0000166|GO:0004674|GO:0016301|GO:0015630|GO:0006468|GO:0016740|GO:0016772	NM_001135121	Dr.85306	572548	ENSDART00000078206	doublecortin-like kinase 2	NP9502009	14.9094	311.782	4.36967	7.52853
A_15_P257106	-2.17559	-1.12141	2.17559	down	NM_001100001	chr5:68603437-68603378	camsap1b	Danio rerio calmodulin regulated spectrin-associated protein 1b (camsap1b), mRNA [NM_001100001]	GO:0008017	NM_001100001	Dr.21663	561094	ENSDART00000082776	calmodulin regulated spectrin-associated protein 1b	TC365688	74.1388	377.197	6.67788	7.79928
A_15_P334654	-3.02174	-1.59538	3.02174	down	NM_213408	chr6:49041576-49043630	slc25a22	Danio rerio solute carrier family 25 (mitochondrial carrier: glutamate), member 22 (slc25a22), mRNA [NM_213408]	GO:0015813|GO:0016020|GO:0005313|GO:0006810|GO:0005743|GO:0016021|GO:0055085	NM_213408	Dr.75253	406717	ENSDART00000103385	solute carrier family 25 (mitochondrial carrier: glutamate), member 22	TC452152	444.447	2632.58	9.08985	10.6852
A_15_P440970	-3.86567	-1.95072	3.86567	down	NM_199277	chr13:2146840-2146899	gclc	Danio rerio glutamate-cysteine ligase, catalytic subunit (gclc), mRNA [NM_199277]	GO:0050662|GO:0043066|GO:0000287|GO:0006536|GO:0009408|GO:0006534|GO:0016874|GO:0005737|GO:0050880|GO:0043531|GO:0004357|GO:0006750|GO:0045454|GO:0009725|GO:0016595|GO:0045892|GO:0006979	NM_199277	Dr.80394	326857	ENSDART00000017148	glutamate-cysteine ligase, catalytic subunit	TC438025	71.0522	639.011	6.6174	8.56811
A_15_P752586	-2.29895	-1.20098	2.29895	down	NM_181601	chr3:40522794-40522735	actb2	Danio rerio actin, beta 2 (actb2), mRNA [NM_181601]	GO:0005737|GO:0000166|GO:0005856|GO:0005524	NM_181601	Dr.152450	57935	ENSDART00000132497	actin, beta 2	TC438059	51427.5	143011	15.7097	16.9107
A_15_P102971	-3.67941	-1.87947	3.67941	down	NM_212587	chr14:6929811-6929870	hnrnpaba	Danio rerio heterogeneous nuclear ribonucleoprotein A/B (hnrnpab), mRNA [NM_212587]	GO:0019013|GO:0000166|GO:0030529|GO:0003676|GO:0019012	NM_212587	Dr.75877	321466	ENSDART00000008158	heterogeneous nuclear ribonucleoprotein A/Ba	TC397546	10138.1	51135	13.2241	15.1035
A_15_P654326	-2.84979	-1.51085	2.84979	down	NM_198070	chr23:20406121-20405949	tktb	Danio rerio transketolase (tkt), mRNA [NM_198070]	GO:0008152|GO:0003824|GO:0016740|GO:0004802	NM_198070	Dr.75247	378713	ENSDART00000144708	transketolase b	TC438129	6958.17	28117.1	12.7034	14.2142
A_15_P185726	-3.30562	-1.72492	3.30562	down	NM_212759	chr6:37639431-37639490	cyfip1	Danio rerio cytoplasmic FMR1 interacting protein 1 (cyfip1), mRNA [NM_212759]	GO:0005737|GO:0051015|GO:0008360|GO:0030032|GO:0048675|GO:0007275|GO:0003779|GO:0031529|GO:0030154|GO:0007399	NM_212759	Dr.1164	336613	ENSDART00000104233	cytoplasmic FMR1 interacting protein 1	TC372513	120.738	903.497	7.34803	9.07295
A_15_P218566	-2.29088	-1.1959	2.29088	down	NM_213099	chr21:16881627-16881318	wdr5	Danio rerio WD repeat domain 5 (wdr5), mRNA [NM_213099]		NM_213099	Dr.81874	406372	ENSDART00000147768	WD repeat domain 5	TC445399	423.824	1958.38	9.02879	10.2247
A_15_P485110	-5.82994	-2.54348	5.82994	down	NM_001204257	chr17:14460648-14460589	ppp1r13ba	Danio rerio protein phosphatase 1, regulatory subunit 13Ba (ppp1r13ba), mRNA [NM_001204257]		NM_001204257	Dr.75385	563577	ENSDART00000135891	protein phosphatase 1, regulatory subunit 13Ba	TC402797	13.4707	180.181	4.22273	6.76621
A_15_P185546	-20.187	-4.33536	20.187	down	XM_005165879	chr6:30546102-30546043		phosphodiesterase 4B, cAMP-specific a [Source:ZFIN;Acc:ZDB-GENE-030131-9570] [ENSDART00000028612]		XM_005165879			ENSDART00000028612		TC380716	8.18103	391.799	3.51257	7.84792
A_15_P625177	-3.70061	-1.88776	3.70061	down	NM_001077286	chr12:26570010-26569951	socs5a	Danio rerio suppressor of cytokine signaling 5a (socs5a), transcript variant 2, mRNA [NM_001077286]	GO:0035556|GO:0016567	NM_001077286	Dr.117259	768142	ENSDART00000112562	suppressor of cytokine signaling 5a	TC367485	18.6286	159.461	4.70733	6.5951
A_15_P701341	-2.13977	-1.09746	2.13977	down	NM_130941	chr6:59575896-59575955	pl10	Danio rerio pl10 (pl10), mRNA [NM_130941]	GO:0008026|GO:0016787|GO:0000166|GO:0004386|GO:0003676|GO:0005524	NM_130941	Dr.75779	30116	ENSDART00000102148	pl10	TC406637	7607.53	23091.3	12.8328	13.9303
A_15_P748376	-2.09536	-1.0672	2.09536	down	NM_214696	chr20:2770639-2770698	syncrip	Danio rerio synaptotagmin binding, cytoplasmic RNA interacting protein (syncrip), mRNA [NM_214696]	GO:0000166|GO:0003676	NM_214696	Dr.75407	326663	ENSDART00000152655	synaptotagmin binding, cytoplasmic RNA interacting protein	TC412744	5678.89	17464.7	12.4235	13.4907
A_15_P450650	-2.21825	-1.14942	2.21825	down	XM_692115	chr11:24286726-24286667		pleckstrin homology domain containing, family A member 6 [Source:HGNC Symbol;Acc:17053] [ENSDART00000032844]		XM_692115			ENSDART00000032844		TC413020	19.0657	96.4173	4.74051	5.88993
A_15_P724916	-2.48485	-1.31316	2.48485	down	NM_213233	chr6:219890-219949	atf4b1	Danio rerio activating transcription factor 4b1 (tax-responsive enhancer element B67) (atf4b1), mRNA [NM_213233]	GO:0043565|GO:0006355|GO:0005737|GO:0003700|GO:0016020|GO:0005886|GO:0005634|GO:0003677|GO:0006351	NM_213233	Dr.5846	406514	ENSDART00000042970	activating transcription factor 4b1 (tax-responsive enhancer element B67)	TC389651	4520.01	16688.7	12.1145	13.4276
A_15_P587192	-2.33119	-1.22107	2.33119	down	NM_001020652	chr12:27479458-27479399	sncgb	Danio rerio synuclein, gamma b (breast cancer-specific protein 1) (sncgb), mRNA [NM_001020652]	GO:0003674|GO:0008345|GO:0071542	NM_001020652	Dr.82841	553679	ENSDART00000105615	synuclein, gamma b (breast cancer-specific protein 1)	TC398610	26.3852	141.867	5.21209	6.43316
A_15_P646661	-2.17818	-1.12312	2.17818	down	NM_212970	chr1:11411463-11411404	mtp	Danio rerio microsomal triglyceride transfer protein (mtp), mRNA [NM_212970]	GO:0006629|GO:0001579|GO:0007586|GO:0006869|GO:0002040|GO:0015909|GO:0005319	NM_212970	Dr.75507	406207	ENSDART00000015251	microsomal triglyceride transfer protein	TC366959	62.5406	319.394	6.43989	7.56301
A_15_P120117	-2.31151	-1.20883	2.31151	down	NM_001030174	chr5:62543390-62543579	lig3	Danio rerio ligase III, DNA, ATP-dependent (lig3), mRNA [NM_001030174]	GO:0005694|GO:0016874|GO:0003909|GO:0006310|GO:0005634|GO:0003910|GO:0003677|GO:0005524|GO:0006974|GO:0005739|GO:0006260|GO:0006273|GO:0006281|GO:0051103|GO:0000166|GO:0008270|GO:0006289|GO:0006266	NM_001030174	Dr.107348	563276	ENSDART00000074426	ligase III, DNA, ATP-dependent	TC367088	435.772	2027.11	9.06764	10.2765
A_15_P535357	-4.17401	-2.06143	4.17401	down	NM_198821	chr9:33679531-33679266	dnajb11	Danio rerio DnaJ (Hsp40) homolog, subfamily B, member 11 (dnajb11), mRNA [NM_198821]	GO:0006457|GO:0051082	NM_198821	Dr.9667	386709	ENSDART00000013282	DnaJ (Hsp40) homolog, subfamily B, member 11	TC376309	129.85	1211.43	7.45479	9.51622
A_15_P568797	-2.10043	-1.07068	2.10043	down	NM_001080028	chr20:153763-148603	slc16a10	Danio rerio solute carrier family 16, member 10 (aromatic amino acid transporter) (slc16a10), mRNA [NM_001080028]	GO:0016020|GO:0005886|GO:0016021|GO:0055085	NM_001080028	Dr.101972	566499	ENSDART00000131635	solute carrier family 16, member 10 (aromatic amino acid transporter)	TC368599	19.6285	93.6409	4.77805	5.84873
A_15_P155086	-3.50267	-1.80846	3.50267	down	NM_183072	chr6:1380621-1381870	txnrd1	Danio rerio thioredoxin reductase 1 (txnrd1), mRNA [NM_183072]	GO:0050661|GO:0016668|GO:0050660|GO:0016491|GO:0015035|GO:0009055|GO:0004791|GO:0045454|GO:0055114	NM_183072	Dr.77564	352924	ENSDART00000129249	thioredoxin reductase 1	TC379979	435.413	2959.49	9.06647	10.8749
A_15_P132581	-2.33142	-1.22121	2.33142	down	NM_205749	chr3:18383191-18383250	cbx4	Danio rerio chromobox homolog 4 (Pc class homolog, Drosophila) (cbx4), mRNA [NM_205749]	GO:0005634	NM_205749	Dr.88560	573110	ENSDART00000104273	chromobox homolog 4 (Pc class homolog, Drosophila)	TC376548	26.4551	142.271	5.21557	6.43678
A_15_P155376	-2.41345	-1.2711	2.41345	down	EB955057	chr10:24765470-24765411	pitpnab	phosphatidylinositol transfer protein, alpha b [Source:ZFIN;Acc:ZDB-GENE-110408-51] [ENSDART00000002974]	GO:0005622|GO:0006810	XM_002663555	Dr.152835	100333060	ENSDART00000002974	phosphatidylinositol transfer protein, alpha b	TC400184	7.78762	41.8273	3.43678	4.70788
A_15_P185566	-2.75894	-1.46411	2.75894	down	XM_005165885	chr6:31466308-31466249	ror1	receptor tyrosine kinase-like orphan receptor 1 [Source:ZFIN;Acc:ZDB-GENE-030131-6104] [ENSDART00000132280]	GO:0004672|GO:0016020|GO:0006468|GO:0016021|GO:0004713|GO:0004714|GO:0007169|GO:0005524|GO:0016772	XM_005165885		568282	ENSDART00000132280	receptor tyrosine kinase-like orphan receptor 1	TC367500	37.8198	246.044	5.72944	7.19355
A_15_P485335	-3.90769	-1.96632	3.90769	down	NM_001103192	chr3:24490212-24490271	atf4b2	Danio rerio activating transcription factor 4b2 (atf4b2), mRNA [NM_001103192]	GO:0043565|GO:0006355|GO:0003700	NM_001103192	Dr.104781	556410	ENSDART00000055609	activating transcription factor 4b2	TC436850	367.761	2832.07	8.83574	10.8021
A_15_P192251	-2.11946	-1.0837	2.11946	down	NM_001044824	chr20:20883912-20883971	ppp1r13bb	Danio rerio protein phosphatase 1, regulatory (inhibitor) subunit 13Bb (ppp1r13bb), mRNA [NM_001044824]		NM_001044824	Dr.74207	557278	ENSDART00000047662	protein phosphatase 1, regulatory (inhibitor) subunit 13Bb	TC402792	119.122	574.3	7.32849	8.41219
A_15_P202016	-2.02532	-1.01815	2.02532	down	NM_001137665	chr9:45888302-45891775	nckap1	Danio rerio NCK-associated protein 1 (nckap1), mRNA [NM_001137665]		NM_001137665	Dr.79564	561894	ENSDART00000086176	NCK-associated protein 1	TC387248	324.45	1364.32	8.67274	9.69089
A_15_P300806	-4.96646	-2.31222	4.96646	down	XM_692771	chr23:11972974-11972572	im:7155308	erythrocyte membrane protein band 4.1-like 1 [Source:HGNC Symbol;Acc:3378] [ENSDART00000110627]	GO:0008150|GO:0003674|GO:0005575	XM_692771		569390	ENSDART00000110627	im:7155308	TC425225	13.6861	155.216	4.24478	6.557
A_15_P196691	-2.22139	-1.15146	2.22139	down	NM_001013316	chr16:58464034-58462732	tmem222a	Danio rerio transmembrane protein 222a (tmem222a), mRNA [NM_001013316]	GO:0008150|GO:0003674|GO:0005575	NM_001013316	Dr.78557	503738	ENSDART00000101402	transmembrane protein 222a	TC391399	26.1428	133.89	5.19979	6.35126
A_15_P548592	-3.7885	-1.92163	3.7885	down	XM_683800	chr12:19369392-19369451	fam20cb	family with sequence similarity 20, member C [Source:ZFIN;Acc:ZDB-GENE-050301-4] [ENSDART00000130741]		XM_683800		560397	ENSDART00000130741	family with sequence similarity 20, member Cb	NP13322136	5	32.2312	2.40516	4.32679
A_15_P762586	-2.50584	-1.32529	2.50584	down												136.092	771.557	7.52145	8.84674
A_15_P184416	-3.26892	-1.70881	3.26892	down		chr20:30745977-30746036	acbd3	acyl-Coenzyme A binding domain containing 3 [Source:ZFIN;Acc:ZDB-GENE-040426-1930] [ENSDART00000062525]	GO:0006810|GO:0016021|GO:0000062			406270	ENSDART00000062525	acyl-Coenzyme A binding domain containing 3	TC398796	64.08	490.054	6.47282	8.18163
A_15_P131136	-2.77811	-1.4741	2.77811	down	NM_001172564	chr21:12852554-12849997	ehmt1b	Danio rerio euchromatic histone-lysine N-methyltransferase 1b (ehmt1b), mRNA [NM_001172564]	GO:0005694|GO:0008168|GO:0034968|GO:0008270|GO:0005634|GO:0032259|GO:0016740|GO:0018024	NM_001172564	Dr.132728	402830	ENSDART00000123047	euchromatic histone-lysine N-methyltransferase 1b	TC417580	103.86	660.21	7.14179	8.61589
A_15_P629976	-2.29513	-1.19858	2.29513	down	NM_001123515	chr4:16648655-16648596	nrip2	Danio rerio nuclear receptor interacting protein 2 (nrip2), mRNA [NM_001123515]	GO:0006508|GO:0004190	NM_001123515	Dr.81471	565865	ENSDART00000108814	nuclear receptor interacting protein 2	TC443974	10.5883	54.2746	3.88669	5.08527
A_15_P156586	-2.21457	-1.14702	2.21457	down	NM_001128702	chr24:17673194-17673253	pip4k2aa	Danio rerio phosphatidylinositol-5-phosphate 4-kinase, type II, alpha a (pip4k2aa), mRNA [NM_001128702]	GO:0016310|GO:0016301|GO:0046488|GO:0016307|GO:0005575|GO:0016740	NM_001128702	Dr.120543	560360	ENSDART00000014787	phosphatidylinositol-5-phosphate 4-kinase, type II, alpha a	TC373796	24.3191	123.072	5.09088	6.23791
A_15_P119973	-2.8812	-1.52667	2.8812	down	NM_001080012	chr1:35541884-35541943	hhip	Danio rerio hedgehog interacting protein (hhip), mRNA [NM_001080012]	GO:0048635|GO:0048038|GO:0016901|GO:0005975|GO:0031226|GO:0045879|GO:0016021|GO:0009968|GO:0033333|GO:0003824	NM_001080012	Dr.119698	326102	ENSDART00000085051	hedgehog interacting protein	TC365670	150.09	966.48	7.64967	9.17634
A_15_P236211	-2.15923	-1.11052	2.15923	down	CT609180	chr10:25083376-25083317		proline and serine rich 1 [Source:HGNC Symbol;Acc:20291] [ENSDART00000128902]		XM_679230	Dr.80783		ENSDART00000128902		TC444189	192.655	917.698	7.98684	9.09736
A_15_P423300	-5.64923	-2.49805	5.64923	down	XM_001335557	chr15:16133376-16133435	relb	v-rel reticuloendotheliosis viral oncogene homolog B [Source:ZFIN;Acc:ZDB-GENE-030131-9531] [ENSDART00000123197]	GO:0006355|GO:0003700|GO:0005634	XM_001335557	Dr.81541	795414	ENSDART00000123197	v-rel reticuloendotheliosis viral oncogene homolog B	TC407252	5.46118	68.978	2.93595	5.434
A_15_P491957	-4.16111	-2.05697	4.16111	down	XM_005155648	chr10:16896592-16896651		GB		XM_005155648					NP13321239	5	35.4791	2.40516	4.46213
A_15_P183051	-2.3501	-1.23272	2.3501	down	NM_001077720	chr19:49754624-49754565	atf6b	Danio rerio activating transcription factor 6 beta (atf6b), mRNA [NM_001077720]	GO:0043565|GO:0006355|GO:0003700	NM_001077720	Dr.156208	777612	ENSDART00000102070	activating transcription factor 6 beta	TC411449	14.6445	76.5259	4.3433	5.57602
A_15_P227546	-6.56886	-2.71564	6.56886	down	NM_001077153	chr17:37960647-37960588	zfp36l1a	Danio rerio zinc finger protein 36, C3H type-like 1a (zfp36l1a), mRNA [NM_001077153]	GO:0046872	NM_001077153	Dr.76498	561280	ENSDART00000025853	zinc finger protein 36, C3H type-like 1a	TC403448	256.45	3403.72	8.36979	11.0854
A_15_P403985	-2.06752	-1.0479	2.06752	down	NM_199774	chr11:22370-22429	dusp7	Danio rerio dual specificity phosphatase 7 (dusp7), mRNA [NM_199774]	GO:0000188|GO:0016791|GO:0006470|GO:0016787|GO:0016311|GO:0004721|GO:0008138|GO:0017017|GO:0004725|GO:0005829	NM_199774	Dr.8695	327246	ENSDART00000050396	dual specificity phosphatase 7	TC366465	17.0285	78.7417	4.56563	5.61353
A_15_P175241	-2.41997	-1.27499	2.41997	down	NM_001045166	chr6:9304937-9304996	pglyrp2	Danio rerio peptidoglycan recognition protein 2 (pglyrp2), mRNA [NM_001045166]	GO:0009253|GO:0008745|GO:0008270|GO:0042742	NM_001045166	Dr.67552	568634	ENSDART00000149222	peptidoglycan recognition protein 2	TC380703	853.364	3666.37	9.92159	11.1966
A_15_P697516	-2.59088	-1.37344	2.59088	down	BC129248	chr19:5512696-5512860	LOC100149834	Danio rerio hypothetical LOC559027, mRNA (cDNA clone IMAGE:7059328), partial cds. [BC129248]		XM_003200531	Dr.135073	100149834	ENSDART00000093402	cdc2-related kinase, arginine/serine-rich-like	TC377778	69.0836	422.799	6.5814	7.95485
A_15_P107945	-2.63757	-1.39921	2.63757	down	NM_001017848	chr19:32745316-32723003	necab1	Danio rerio N-terminal EF-hand calcium binding protein 1 (necab1), mRNA [NM_001017848]	GO:0005509	NM_001017848	Dr.84692	550546	ENSDART00000114117	N-terminal EF-hand calcium binding protein 1	TC412959	5	22.7892	2.40516	3.80438
A_15_P116684	-2.39022	-1.25714	2.39022	down	NM_001004601	chr11:39775801-39775742	nucks1a	Danio rerio nuclear casein kinase and cyclin-dependent kinase substrate 1a (nucks1a), mRNA [NM_001004601]	GO:0016310|GO:0016301|GO:0005575|GO:0016740	NM_001004601	Dr.76746	447862	ENSDART00000102858	nuclear casein kinase and cyclin-dependent kinase substrate 1a	TC388096	11959.4	40732	13.4776	14.7348
A_15_P181861	-4.1952	-2.06874	4.1952	down	XM_686823	chr19:8180501-8182321	pbxip1a	pre-B-cell leukemia homeobox interacting protein 1a [Source:ZFIN;Acc:ZDB-GENE-060503-871] [ENSDART00000115058]		XM_686823		563463	ENSDART00000115058	pre-B-cell leukemia homeobox interacting protein 1a	TC375925	68.8371	672.495	6.57586	8.64461
A_15_P707041	-5.13878	-2.36143	5.13878	down	CA472564	chr20:12387727-12387784		AGENCOURT_10740106 NCI_CGAP_ZKid1 Danio rerio cDNA clone IMAGE:6793321 5', mRNA sequence [CA472564]		XM_005157776	Dr.162121				NP13317908	14.5202	170.373	4.32985	6.69127
A_15_P298621	-3.05775	-1.61247	3.05775	down		chr9:18696479-18696538		GB							NP13321101	11.8447	81.3265	4.04185	5.65432
A_15_P120964	-2.37325	-1.24687	2.37325	down	NM_200060	chr16:40977069-40977055	cdc42se1	Danio rerio CDC42 small effector 1 (cdc42se1), mRNA [NM_200060]	GO:0003674|GO:0005737|GO:0016020|GO:0005886|GO:0008360|GO:0005856	NM_200060	Dr.75985	791998	ENSDART00000031895	CDC42 small effector 1	TC398260	73.9824	412.179	6.67425	7.92112
A_15_P418495	-2.11971	-1.08387	2.11971	down	NM_213436	chr17:21729297-21732066	plekha1	Danio rerio pleckstrin homology domain containing, family A (phosphoinositide binding specific) member 1 (plekha1), mRNA [NM_213436]	GO:0008150|GO:0005543|GO:0005575	NM_213436	Dr.77206	406745	ENSDART00000131929	pleckstrin homology domain containing, family A (phosphoinositide binding specific) member 1	TC368399	168.532	794.056	7.80732	8.89119
A_15_P475975	-2.8043	-1.48764	2.8043	down	GW713744	chr3:6576843-6576784	LOC568650	Uncharacterized protein [Source:UniProtKB/TrEMBL;Acc:E7F9G5] [ENSDART00000124570]		XM_691992	Dr.65565	568650	ENSDART00000124570	microtubule-associated protein futsch-like	TC380829	187.888	1153.81	7.957	9.44464
A_15_P732491	-3.6431	-1.86517	3.6431	down	NM_001082481	chr8:47203661-47203477	zgc:158399	Danio rerio zgc:158399 (zgc:158399), mRNA [NM_001082481]	GO:0008150|GO:0003674|GO:0005575	NM_001082481	Dr.47698	570789	ENSDART00000084241	zgc:158399	TC423309	489.993	3389.65	9.21421	11.0794
A_15_P162441	-2.05757	-1.04094	2.05757	down	NM_212810	chr23:12974741-12974800	smc1al	Danio rerio structural maintenance of chromosomes 1A, like (smc1al), mRNA [NM_212810]	GO:0051276|GO:0006281|GO:0030261|GO:0005694|GO:0007062|GO:0006310|GO:0005634|GO:0005524	NM_212810	Dr.76942	403060	ENSDART00000121697	structural maintenance of chromosomes 1A, like	TC371806	286.242	1248.19	8.51749	9.55843
A_15_P495007	-2.30619	-1.20551	2.30619	down	NM_001001818	chr11:35755292-35755233	gnai2a	Danio rerio guanine nucleotide binding protein (G protein), alpha inhibiting activity polypeptide 2a (gnai2a), mRNA [NM_001001818]	GO:0001664|GO:0005834|GO:0003924|GO:0007214|GO:0031683|GO:0005525|GO:0007193|GO:0031234|GO:0006184|GO:0007165|GO:0019001|GO:0000166|GO:0001973|GO:0007186|GO:0007188|GO:0004871	NM_001001818	Dr.76694	336421	ENSDART00000034039	guanine nucleotide binding protein (G protein), alpha inhibiting activity polypeptide 2a	TC388519	223.699	1114.81	8.18489	9.3904
A_15_P513162	-3.74486	-1.90491	3.74486	down	XM_002665389	chr18:33775579-33775520	itpkcb	inositol 1,4,5-trisphosphate 3-kinase Cb [Source:ZFIN;Acc:ZDB-GENE-080225-27] [ENSDART00000141023]	GO:0008440|GO:0005575	XM_002665389		322720	ENSDART00000141023	inositol 1,4,5-trisphosphate 3-kinase Cb	TC405432	89.6025	770.424	6.93889	8.8438
A_15_P515234	-2.12807	-1.08954	2.12807	down	NM_213363	chr25:13131605-13131757	uba2	Danio rerio ubiquitin-like modifier activating enzyme 2 (uba2), mRNA [NM_213363]	GO:0005737|GO:0000166|GO:0016925|GO:0016874|GO:0005634|GO:0008641|GO:0003824|GO:0005524|GO:0046872|GO:0019948|GO:0006464	NM_213363	Dr.78013	406672		ubiquitin-like modifier activating enzyme 2	TC382914	1771.33	6086.28	10.8592	11.9487
A_15_P166221	-2.20201	-1.13882	2.20201	down	NM_001128769	chr12:5654075-5654016	lgi1b	Danio rerio leucine-rich, glioma inactivated 1b (lgi1b), mRNA [NM_001128769]	GO:0048854	NM_001128769	Dr.94490	654829	ENSDART00000081298	leucine-rich, glioma inactivated 1b	TC370156	8.94577	44.2557	3.64406	4.78288
A_15_P146891	-2.41549	-1.27232	2.41549	down	NM_213522	chr5:38136400-38136548	igbp1	Danio rerio immunoglobulin (CD79A) binding protein 1 (igbp1), mRNA [NM_213522]	GO:0009966|GO:0005575	NM_213522	Dr.75484	406843	ENSDART00000006899	immunoglobulin (CD79A) binding protein 1	TC410508	212.641	1117.18	8.12041	9.39273
A_15_P223702	-2.08158	-1.05768	2.08158	down	NM_200309	chr7:27372460-27372401	ap1s1	Danio rerio adaptor-related protein complex 1, sigma 1 subunit (ap1s1), mRNA [NM_200309]	GO:0048471|GO:0005886|GO:0030198|GO:0008565|GO:0006810|GO:0016192|GO:0015031|GO:0006886|GO:0030117|GO:0007399	NM_200309	Dr.75705	393279	ENSDART00000079357	adaptor-related protein complex 1, sigma 1 subunit	TC452346	753.396	2875.22	9.76813	10.8258
A_15_P721891	-2.7923	-1.48145	2.7923	down	NM_212603	chr1:25627634-25627575	anp32b	Danio rerio acidic (leucine-rich) nuclear phosphoprotein 32 family, member B (anp32b), mRNA [NM_212603]		NM_212603	Dr.75606	322000	ENSDART00000152401	acidic (leucine-rich) nuclear phosphoprotein 32 family, member B	TC388491	6536.33	26016.8	12.617	14.0984
A_15_P600792	-16.6093	-4.05392	16.6093	down	NM_201336	chr22:38072446-38067415	pfn2	Danio rerio profilin 2 (pfn2), mRNA [NM_201336]	GO:0030036|GO:0003779	NM_201336	Dr.76326	394235	ENSDART00000104687	profilin 2	NP13229090	26.9221	1052.89	5.24382	9.29774
A_15_P723451	-2.25952	-1.17602	2.25952	down	NM_199750	chr16:44570085-44569380	psmc4	Danio rerio proteasome (prosome, macropain) 26S subunit, ATPase, 4 (psmc4), mRNA [NM_199750]	GO:0030163|GO:0017111|GO:0005737|GO:0000502|GO:0016787|GO:0000166|GO:0005524	NM_199750	Dr.76514	326884	ENSDART00000034078	proteasome (prosome, macropain) 26S subunit, ATPase, 4	TC380851	3526.97	12087.5	11.7794	12.9554
A_15_P321426	-6.07852	-2.60372	6.07852	down	BC163560	chr13:45715216-45715157	runx3	runt-related transcription factor 3 [Source:ZFIN;Acc:ZDB-GENE-000605-2] [ENSDART00000138644]	GO:0030097|GO:0006355|GO:0003700|GO:0051216|GO:0005634|GO:0005524|GO:0003677	XM_005169547	Dr.82593	58127	ENSDART00000138644	runt-related transcription factor 3	NP13227398	5	51.5941	2.40516	5.00888
A_15_P767916	-3.81595	-1.93204	3.81595	down	NM_001105588	chr2:32384083-32384024	puf60a	Danio rerio poly-U binding splicing factor a (puf60a), mRNA [NM_001105588]	GO:0000166|GO:0003676	NM_001105588	Dr.33597	562370	ENSDART00000137616	poly-U binding splicing factor a	TC401245	133.01	1138.11	7.49003	9.42208
A_15_P752146	-2.28375	-1.19141	2.28375	down	NM_200114	chr14:42919546-42919404	cstf2	Danio rerio cleavage stimulation factor, 3' pre-RNA, subunit 2 (cstf2), mRNA [NM_200114]	GO:0000166|GO:0005575|GO:0003676	NM_200114	Dr.113612	386806	ENSDART00000064612	cleavage stimulation factor, 3' pre-RNA, subunit 2	TC383009	705.565	2968.41	9.68658	10.878
A_15_P166966	-2.0364	-1.02602	2.0364	down	NM_212730	chr12:35484123-35484182	sfxn2	Danio rerio sideroflexin 2 (sfxn2), mRNA [NM_212730]	GO:0016020|GO:0008324|GO:0055085|GO:0006812	NM_212730	Dr.11588	334757	ENSDART00000075416	sideroflexin 2	TC391460	797.04	2938.68	9.83713	10.8632
A_15_P307981	-3.53656	-1.82235	3.53656	down	CK676901	chr24:36653823-36653882	st18	suppression of tumorigenicity 18 (breast carcinoma) (zinc finger protein) [Source:ZFIN;Acc:ZDB-GENE-041008-121] [ENSDART00000127491]	GO:0006355|GO:0003700|GO:0008270|GO:0005634	XM_003201336	Dr.156848	569230	ENSDART00000127491	suppression of tumorigenicity 18 (breast carcinoma) (zinc finger protein)	TC391009	27.3762	227.501	5.26516	7.08751
A_15_P199096	-2.03574	-1.02555	2.03574	down	DT065602	chr2:37532309-37532368		si:dkeyp-66d1.2 [Source:ZFIN;Acc:ZDB-GENE-070912-658] [ENSDART00000076321]		XM_003197875	Dr.113968		ENSDART00000076321		TC452810	19.0511	88.5057	4.7393	5.76485
A_15_P648356	-5.52008	-2.46469	5.52008	down	NM_001144803	chr1:371001-371412	blzf1	Danio rerio basic leucine zipper nuclear factor 1 (blzf1), mRNA [NM_001144803]	GO:0043001|GO:0007030	NM_001144803	Dr.9166	114452	ENSDART00000134581	basic leucine zipper nuclear factor 1	TC448059	11.8454	149.504	4.04197	6.50666
A_15_P749616	-2.29632	-1.19933	2.29632	down	NM_199333	chr18:710533-702661	pkma	Danio rerio pyruvate kinase, muscle, a (pkma), mRNA [NM_199333]	GO:0016310|GO:0000287|GO:0016301|GO:0030955|GO:0005575|GO:0003824|GO:0016740|GO:0006096|GO:0004743	NM_199333	Dr.79861	335817	ENSDART00000062651	pyruvate kinase, muscle, a	TC418894	61.5346	330.225	6.41431	7.61364
A_15_P441100	-3.58007	-1.83999	3.58007	down	NM_131183	chr18:23658939-23658880	nr2f2	Danio rerio nuclear receptor subfamily 2, group F, member 2 (nr2f2), mRNA [NM_131183]	GO:0006355|GO:0003700|GO:0003707|GO:0005634|GO:0003677|GO:0006351|GO:0046872|GO:0043565|GO:0001946|GO:0060838|GO:0043401|GO:0008270|GO:0004879	NM_131183	Dr.77152	30424	ENSDART00000130163	nuclear receptor subfamily 2, group F, member 2	TC389341	78.5423	654.581	6.76336	8.60334
A_15_P751636	-3.28883	-1.71758	3.28883	down	NM_001080184	chr23:36354621-36353231	cbx5	Danio rerio chromobox homolog 5 (HP1 alpha homolog, Drosophila) (cbx5), mRNA [NM_001080184]	GO:0005634	NM_001080184	Dr.104817	563396	ENSDART00000146986	chromobox homolog 5 (HP1 alpha homolog, Drosophila)	NP13225930	1419.78	7621.85	10.5699	12.2875
A_15_P670866	-2.2164	-1.14822	2.2164	down	XM_002663863	chr12:984118-984177		Rep: Sll1570 protein - Synechocystis sp. (strain PCC 6803), partial (6%) [TC408842]		XM_002663863					TC408842	197.048	962.963	8.02058	9.1688
A_15_P752196	-3.96747	-1.98822	3.96747	down	NM_201034	chr23:28969005-28969064	srm	Danio rerio spermidine synthase (srm), mRNA [NM_201034]	GO:0005575|GO:0003824|GO:0016740	NM_201034	Dr.84961	394009	ENSDART00000078156	spermidine synthase	TC399413	572.217	4218.4	9.41955	11.4078
A_15_P112508	-2.47092	-1.30505	2.47092	down	NM_200507	chr9:21817240-21817299	fam46c	Danio rerio family with sequence similarity 46, member C (fam46c), mRNA [NM_200507]	GO:0008150|GO:0003674|GO:0005575	NM_200507	Dr.142747	327154	ENSDART00000023572	family with sequence similarity 46, member C	TC371714	58.5833	338.216	6.34413	7.64918
A_15_P503267	-2.27317	-1.1847	2.27317	down	NM_001013533	chr14:34453856-34453708	lamp2	Danio rerio lysosomal membrane glycoprotein 2 (lamp2), mRNA [NM_001013533]	GO:0008150|GO:0016020	NM_001013533	Dr.32418	541406	ENSDART00000132813	lysosomal membrane glycoprotein 2	TC399284	805.882	3299.82	9.85243	11.0371
A_15_P730111	-3.45575	-1.789	3.45575	down	XM_005173193	chr14:029546085-029546144		Rep: LRRGT00165 - Rattus norvegicus (Rat), partial (7%) [TC401738]		XM_005173193					TC415336	529.37	3461.27	9.3217	11.1107
A_15_P195286	-2.71049	-1.43856	2.71049	down	NM_001099419	Zv9_NA123:39222-39163	zgc:165507	Danio rerio zgc:165507 (zgc:165507), mRNA [NM_001099419]	GO:0015711|GO:0015355|GO:0016021|GO:0055085	NM_001099419	Dr.111213	561188	ENSDART00000110209	zgc:165507	TC373087	35.0077	221.155	5.60947	7.04802
A_15_P134081	-2.66146	-1.41222	2.66146	down	NM_212579	chr19:40011505-40013418	col9a2	Danio rerio procollagen, type IX, alpha 2 (col9a2), mRNA [NM_212579]	GO:0005581	NM_212579	Dr.75252	321212	ENSDART00000033037	procollagen, type IX, alpha 2	TC369196	486.651	2512.26	9.20314	10.6154
A_15_P444300	-2.79691	-1.48383	2.79691	down	NM_001017797	chr2:59493115-59493056	zgc:112425	Danio rerio zgc:112425 (zgc:112425), mRNA [NM_001017797]	GO:0000166|GO:0005575|GO:0003676	NM_001017797	Dr.75965	550495	ENSDART00000093068	zgc:112425	NP13229251	2015.95	8941.82	11.036	12.5199
A_15_P668221	-3.22164	-1.68779	3.22164	down	BC097041	chr19:11825396-11825337		Uncharacterized protein [Source:UniProtKB/TrEMBL;Acc:F1QUG1] [ENSDART00000131014]			Dr.150458		ENSDART00000131014		TC404398	671.01	3947.42	9.62025	11.308
A_15_P506002	-2.75759	-1.46341	2.75759	down	NM_199853	chr20:30961168-30961109	wtap	Danio rerio Wilms tumor 1 associated protein (wtap), mRNA [NM_199853]	GO:0008380|GO:0006397|GO:0007049|GO:0005730|GO:0005634	NM_199853	Dr.6973	334058	ENSDART00000062552	Wilms tumor 1 associated protein	TC383692	305.156	1757.74	8.59863	10.062
A_15_P335039	-3.24967	-1.70029	3.24967	down	NM_001045308	chr13:46095327-46095267	zgc:136474	Danio rerio zgc:136474 (zgc:136474), mRNA [NM_001045308]	GO:0008150|GO:0003674|GO:0005575	NM_001045308	Dr.77881	724003	ENSDART00000043345	zgc:136474	TC436455	103.885	769.641	7.14244	8.84273
A_15_P725181	-2.4855	-1.31353	2.4855	down	BC053133	chr1:455463-455522	mrpl39	mitochondrial ribosomal protein L39 [Source:ZFIN;Acc:ZDB-GENE-030131-6520] [ENSDART00000143526]	GO:0000166|GO:0030529|GO:0005840	XM_005167987	Dr.39871	334588	ENSDART00000143526	mitochondrial ribosomal protein L39	TC434612	87.7365	505.553	6.91058	8.22411
A_15_P724026	-3.72579	-1.89755	3.72579	down	NM_001007771	chr3:36743170-36743229	glyr1	Danio rerio glyoxylate reductase 1 homolog (Arabidopsis) (glyr1), mRNA [NM_001007771]	GO:0050662|GO:0004616|GO:0016491|GO:0005634|GO:0035064|GO:0006098|GO:0055114|GO:0016616	NM_001007771	Dr.77851	493611	ENSDART00000055239	glyoxylate reductase 1 homolog (Arabidopsis)	TC400617	126.503	1063.1	7.41669	9.31424
A_15_P119066	-2.13692	-1.09554	2.13692	down	NM_001100007	chr2:18285519-18285460	ptbp2b	Danio rerio polypyrimidine tract binding protein 2b (ptbp2b), mRNA [NM_001100007]	GO:0006397|GO:0000166|GO:0003723|GO:0005634|GO:0003676	NM_001100007	Dr.75530	562434	ENSDART00000038648	polypyrimidine tract binding protein 2b	TC372645	286.195	1295.91	8.51705	9.61259
A_15_P663966	-2.80589	-1.48846	2.80589	down	NM_130941	chr6:59575226-59575285	pl10	Danio rerio pl10 (pl10), mRNA [NM_130941]	GO:0008026|GO:0016787|GO:0000166|GO:0004386|GO:0003676|GO:0005524	NM_130941	Dr.75779	30116	ENSDART00000102148	pl10	TC407749	1800.11	8062.71	10.8824	12.3709
A_15_P748666	-2.10499	-1.07381	2.10499	down	NM_213294	chr20:2748013-2747788	akirin2	Danio rerio akirin 2 (akirin2), mRNA [NM_213294]	GO:0008150|GO:0003674	NM_213294	Dr.4764	406855	ENSDART00000123742	akirin 2	TC434831	3080.14	9971.69	11.5944	12.6683
A_15_P109527	-2.41078	-1.2695	2.41078	down	NM_214810	chr1:19652255-19652196	cpe	Danio rerio carboxypeptidase E (cpe), mRNA [NM_214810]	GO:0006508|GO:0008270|GO:0005575|GO:0004181	NM_214810	Dr.106912	407979	ENSDART00000078271	carboxypeptidase E	TC365699	79.8845	449.178	6.78462	8.05412
A_15_P760311	-2.10897	-1.07654	2.10897	down	NM_200627	chr16:37347-37406	cdkal1	Danio rerio CDK5 regulatory subunit associated protein 1-like 1 (cdkal1), mRNA [NM_200627]	GO:0051539|GO:0051536|GO:0016020|GO:0005783|GO:0009451|GO:0005789|GO:0043412|GO:0016021|GO:0003824|GO:0046872|GO:0016740|GO:0008033	NM_200627	Dr.118384	393600		CDK5 regulatory subunit associated protein 1-like 1	TC441711	65.2414	321.492	6.4973	7.57383
A_15_P106953	-2.08902	-1.06283	2.08902	down	NM_200003	chr5:38546043-38545984	h3f3c	Danio rerio H3 histone, family 3C (h3f3c), mRNA [NM_200003]		NM_200003	Dr.75577	336231		H3 histone, family 3C	TC404133	29748.5	83974.8	14.8407	15.9035
A_15_P507922	-3.4641	-1.79248	3.4641	down	NM_001126453	chr5:21699083-21699024	git2a	Danio rerio G protein-coupled receptor kinase interactor 2a (git2a), mRNA [NM_001126453]	GO:0008060|GO:0042074|GO:0032312|GO:0022604|GO:0008270|GO:0046872	NM_001126453	Dr.85918	793882	ENSDART00000088881	G protein-coupled receptor kinase interactor 2a	TC369086	16.2274	127.677	4.49836	6.29084
A_15_P745236	-2.45274	-1.2944	2.45274	down	NM_198873	chr9:21889813-21889871	wdr3	Danio rerio WD repeat domain 3 (wdr3), mRNA [NM_198873]		NM_198873	Dr.132361	321058	ENSDART00000003648	WD repeat domain 3	TC431562	126.332	701.923	7.41485	8.70925
A_15_P634576	-2.06148	-1.04368	2.06148	down	NM_001077274	chr5:004447458-004447399	zgc:153129	Danio rerio zgc:153129 (zgc:153129), mRNA [NM_001077274]	GO:0005622|GO:0004869|GO:0004866|GO:0010466|GO:0030414	NM_001077274	Dr.74454	768128		zgc:153129	TC442912	11645	33875.4	13.4307	14.4744
A_15_P160426	-3.48099	-1.7995	3.48099	down	XM_681491	chr11:20053082-20048311	LOC558290	synaptoporin [Source:HGNC Symbol;Acc:16507] [ENSDART00000054735]		XM_681491		558290	ENSDART00000054735	synaptoporin-like	TC437242	6.84135	52.6096	3.23918	5.03867
A_15_P119027	-2.23497	-1.16025	2.23497	down	XR_117775	chr11:875504-875357		autophagy related 7 [Source:HGNC Symbol;Acc:16935] [ENSDART00000111987]		XM_005172762	Dr.92652		ENSDART00000111987		TC380244	40.2092	210.24	5.81372	6.97398
A_15_P632151	-4.22462	-2.07882	4.22462	down	NM_173277	chr2:35699717-35699776	lamc1	Danio rerio laminin, gamma 1 (lamc1), mRNA [NM_173277]	GO:0031290|GO:0007517|GO:0007634|GO:0050908|GO:0007519|GO:0005578|GO:0005576|GO:0007155|GO:0048570|GO:0005604	NM_173277	Dr.132970	286832	ENSDART00000004277	laminin, gamma 1	TC399880	965.187	7017.77	10.0848	12.1636
A_15_P475865	-3.23433	-1.69347	3.23433	down	NM_001001941	chr2:36913521-36913580	copa	Danio rerio coatomer protein complex, subunit alpha (copa), mRNA [NM_001001941]	GO:0030126|GO:0005198|GO:0030903|GO:0016192|GO:0006886|GO:0030117	NM_001001941	Dr.2921	260439	ENSDART00000111382	coatomer protein complex, subunit alpha	TC365854	371.129	2390.45	8.8489	10.5424
A_15_P609067	-11.0006	-3.45951	11.0006	down	NM_131860	chr14:31974394-31974335	gpc4	Danio rerio glypican 4 (gpc4), mRNA [NM_131860]	GO:0005515|GO:0030334|GO:0014812|GO:0005886|GO:0051216|GO:0005578|GO:0043395|GO:0031225|GO:0001702|GO:0009826|GO:0030166|GO:0060028|GO:0060026|GO:0042074|GO:0060027|GO:0008104|GO:0016020|GO:0030198|GO:0055002|GO:0003379	NM_131860	Dr.78935	118437	ENSDART00000026569	glypican 4	TC444321	6.78027	169.577	3.22732	6.68683
A_15_P239576	-2.0029	-1.00209	2.0029	down	XM_003199487	chr11:24517473-24515325	pik3c2b	phosphoinositide-3-kinase, class 2, beta polypeptide [Source:ZFIN;Acc:ZDB-GENE-050309-145] [ENSDART00000124810]	GO:0005886|GO:0048015|GO:0005524|GO:0046854|GO:0016310|GO:0007154|GO:0000166|GO:0016301|GO:0016303|GO:0016773|GO:0035005|GO:0005942|GO:0035091|GO:0016740|GO:0016772	XM_003199487		567938	ENSDART00000124810	phosphoinositide-3-kinase, class 2, beta polypeptide	TC377038	721.911	2684.46	9.71298	10.7151
A_15_P185196	-3.99523	-1.99828	3.99523	down	EG582168	chr6:3627167-3627226	LOC799504	Sp5 transcription factor [Source:HGNC Symbol;Acc:14529] [ENSDART00000019630]		XM_005172090	Dr.158610	799504	ENSDART00000019630	transcription factor Sp5-like	TC396982	18.694	172.776	4.71224	6.71052
A_15_P142241	-2.89037	-1.53125	2.89037	down	NM_001083847	chr5:32462555-32462020	spns2	Danio rerio spinster homolog 2 (Drosophila) (spns2), transcript variant 1, mRNA [NM_001083847]	GO:0001569|GO:0016020|GO:0006869|GO:0003376|GO:0006810|GO:0061035|GO:0016021|GO:0055085|GO:0001944	NM_001083847	Dr.158912	568117		spinster homolog 2 (Drosophila)	TC373378	17.4286	114.154	4.60183	6.13308
A_15_P264551	-2.04332	-1.03092	2.04332	down	EH567392	chr8:43318083-43318142	pop5	FDR202-P00028-DEPE-R_M01 FDR202 Danio rerio cDNA clone FDR202-P00028-BR_M01 3', mRNA sequence [EH567392]	GO:0016787|GO:0016070|GO:0004526|GO:0005730|GO:0005634|GO:0004540|GO:0008033		Dr.39115	541421		processing of precursor 5, ribonuclease P/MRP subunit (S. cerevisiae)		36.401	172.213	5.67324	6.70415
A_15_P321931	-2.25104	-1.17059	2.25104	down	NM_001017669	chr7:45690410-45679612	dync1li2	Danio rerio dynein, cytoplasmic 1, light intermediate chain 2 (dync1li2), mRNA [NM_001017669]	GO:0007264|GO:0005868|GO:0005525|GO:0003777|GO:0007018	NM_001017669	Dr.122529	573266	ENSDART00000037850	dynein, cytoplasmic 1, light intermediate chain 2	TC383004	39.4904	208.765	5.79004	6.96063
A_15_P234346	-2.22026	-1.15073	2.22026	down	EH579974	chr23:33867971-33867912	csrnp2	cysteine-serine-rich nuclear protein 2 [Source:ZFIN;Acc:ZDB-GENE-090312-137] [ENSDART00000146180]		XM_001343376	Dr.155731	100003989	ENSDART00000146180	cysteine-serine-rich nuclear protein 2	TC377973	53.7732	279.193	6.22169	7.37242
A_15_P738156	-6.496	-2.69955	6.496	down	NM_213362	chr16:14492415-14494962	epn1	Danio rerio epsin 1 (epn1), mRNA [NM_213362]	GO:0008150|GO:0003674|GO:0005575	NM_213362	Dr.79978	406671	ENSDART00000122250	epsin 1	TC416036	8.62973	127.268	3.58709	6.28664
A_15_P581617	-2.59689	-1.37679	2.59689	down	NM_001025299	chr18:239664-239605	slc27a2a	Danio rerio solute carrier family 27 (fatty acid transporter), member 2a (slc27a2a), mRNA [NM_001025299]	GO:0008152|GO:0005575|GO:0003824	NM_001025299	Dr.34746	449925	ENSDART00000052638	solute carrier family 27 (fatty acid transporter), member 2a	TC397846	294.362	1611.03	8.55533	9.93211
A_15_P273171	-3.90247	-1.96439	3.90247	down	NM_001128230	chr10:20110725-20110784	xpo7	Danio rerio exportin 7 (xpo7), mRNA [NM_001128230]	GO:0008536|GO:0005634|GO:0006886	NM_001128230	Dr.75302	407710	ENSDART00000027612	exportin 7	TC412366	11.0491	97.9021	3.94583	5.91022
A_15_P539952	-2.00683	-1.00492	2.00683	down	NM_001077270	chr20:50214335-50214394	ints9	Danio rerio integrator complex subunit 9 (ints9), mRNA [NM_001077270]	GO:0016787|GO:0032039|GO:0016180	NM_001077270	Dr.116109	768124	ENSDART00000097865	integrator complex subunit 9	TC368897	109.786	505.912	7.22068	8.2256
A_15_P747006	-3.27213	-1.71023	3.27213	down	NM_213460	chr19:24517784-24517843	syt11a	Danio rerio synaptotagmin XIa (syt11a), mRNA [NM_213460]	GO:0005215|GO:0016020|GO:0006810|GO:0008021	NM_213460	Dr.9125	406769	ENSDART00000080673	synaptotagmin XIa	TC423542	20.1515	151.491	4.81506	6.52529
A_15_P766131	-2.15987	-1.11095	2.15987	down	BC099995	chr14:6901823-6901764	clk4a	Danio rerio cDNA clone IMAGE:7270576. [BC099995]	GO:0004672|GO:0000166|GO:0004674|GO:0006468|GO:0005524|GO:0016772	XM_003199840	Dr.150277	321857	ENSDART00000126279	CDC-like kinase 4a	TC377253	2937.62	9754.8	11.5282	12.6391
A_15_P324381	-5.58827	-2.4824	5.58827	down	NM_001142672	chr2:37287877-37287570	insra	Danio rerio insulin receptor a (insra), mRNA [NM_001142672]	GO:0043560|GO:0009790|GO:0005524|GO:0016310|GO:0048589|GO:0046777|GO:0004672|GO:0000166|GO:0016020|GO:0016301|GO:0006468|GO:0004713|GO:0016021|GO:0004714|GO:0007169|GO:0016740|GO:0043548|GO:0016772	NM_001142672	Dr.85773	245699	ENSDART00000008302	insulin receptor a	TC382130	6.49724	81.182	3.17002	5.65242
A_15_P757308	-5.76292	-2.5268	5.76292	down	NM_001003835	chr16:11055707-11055861	taf2	Danio rerio TAF2 RNA polymerase II, TATA box binding protein (TBP)-associated factor (taf2), mRNA [NM_001003835]	GO:0006355|GO:0008270|GO:0005634|GO:0008237|GO:0006351	NM_001003835	Dr.20641	324486	ENSDART00000056072	TAF2 RNA polymerase II, TATA box binding protein (TBP)-associated factor	TC423169	19.4248	264.027	4.76482	7.29162
A_15_P659546	-2.39225	-1.25837	2.39225	down	NM_199746	chr3:24361231-24361288	cbx1a	Danio rerio chromobox homolog 1a (HP1 beta homolog Drosophila) (cbx1a), mRNA [NM_199746]	GO:0005634	NM_199746	Dr.76974	326746	ENSDART00000013016	chromobox homolog 1a (HP1 beta homolog Drosophila)	NP13229193	1073.03	4397.15	10.2128	11.4712
A_15_P737451	-3.02771	-1.59823	3.02771	down	NM_198070	chr23:20409485-20409321	tktb	Danio rerio transketolase (tkt), mRNA [NM_198070]	GO:0008152|GO:0003824|GO:0016740|GO:0004802	NM_198070	Dr.75247	378713	ENSDART00000005021	transketolase b	TC416388	1498.25	7368.13	10.639	12.2373
A_15_P493872	-3.42488	-1.77606	3.42488	down	NM_201085	chr10:8007871-8007930	hmgcs1	Danio rerio 3-hydroxy-3-methylglutaryl-Coenzyme A synthase 1 (soluble) (hmgcs1), mRNA [NM_201085]	GO:0004421|GO:0008152|GO:0005575|GO:0008299|GO:0003824	NM_201085	Dr.77183	394060	ENSDART00000134931	3-hydroxy-3-methylglutaryl-Coenzyme A synthase 1 (soluble)	TC387767	31.1748	250.081	5.44134	7.2174
A_15_P107341	-2.31329	-1.20994	2.31329	down	XM_001921064	chr9:41707571-41707564	LOC100147913	BRCA1 associated RING domain 1 [Source:ZFIN;Acc:ZDB-GENE-030131-5883] [ENSDART00000141979]		XM_001921064		100147913	ENSDART00000141979	novel protein similar to vertebrate BRCA1 associated RING domain 1 (BARD1)	TC393179	224.362	1121.93	8.18927	9.39921
A_15_P335910	-2.46479	-1.30146	2.46479	down	NM_213099	chr21:16884949-16884705	wdr5	Danio rerio WD repeat domain 5 (wdr5), mRNA [NM_213099]		NM_213099	Dr.81874	406372	ENSDART00000144322	WD repeat domain 5	TC439132	1082.9	4565.87	10.226	11.5275
A_15_P285911	-3.07605	-1.62108	3.07605	down	NM_201003	chr2:32092710-32092651	ubtfl	Danio rerio upstream binding transcription factor, like (ubtfl), mRNA [NM_201003]	GO:0003682	NM_201003	Dr.82352	393978	ENSDART00000056634	upstream binding transcription factor, like	TC440145	104.162	731.187	7.14696	8.76803
A_15_P729961	-3.02268	-1.59583	3.02268	down	NM_212587	chr14:6929827-6929886	hnrnpaba	Danio rerio heterogeneous nuclear ribonucleoprotein A/B (hnrnpab), mRNA [NM_212587]	GO:0019013|GO:0000166|GO:0030529|GO:0003676|GO:0019012	NM_212587	Dr.75877	321466	ENSDART00000008158	heterogeneous nuclear ribonucleoprotein A/Ba	TC397546	14986.1	60379.3	13.803	15.3988
A_15_P748886	-2.93824	-1.55495	2.93824	down	NM_001115138	chr10:7005694-7005562	ewsr1a	Danio rerio Ewing sarcoma breakpoint region 1a (ewsr1a), mRNA [NM_001115138]	GO:0007067|GO:0000166|GO:0021954|GO:0008270|GO:0003676	NM_001115138	Dr.5648	323597	ENSDART00000138942	Ewing sarcoma breakpoint region 1a	TC456313	1997.55	9341.27	11.024	12.5789
A_15_P182196	-2.43488	-1.28385	2.43488	down	NM_001110456	chr19:20776008-20776067	oxnad1	Danio rerio oxidoreductase NAD-binding domain containing 1 (oxnad1), mRNA [NM_001110456]	GO:0016491|GO:0055114	NM_001110456	Dr.88748	558500	ENSDART00000128300	oxidoreductase NAD-binding domain containing 1	TC368563	372.326	1851.55	8.85261	10.1365
A_15_P159461	-2.37423	-1.24746	2.37423	down	NM_182865	chr4:18349164-18336247	snd1	Danio rerio staphylococcal nuclease domain containing 1 (snd1), mRNA [NM_182865]	GO:0005737|GO:0004518|GO:0016788|GO:0031047|GO:0003676|GO:0016442	NM_182865	Dr.76177	324404	ENSDART00000090972	staphylococcal nuclease domain containing 1	TC380573	5088.76	17751.6	12.2696	13.5171
A_15_P431090	-2.09571	-1.06744	2.09571	down	NM_001044909	chr19:27308270-27308211	neu1	Danio rerio neuraminidase 1 (neu1), mRNA [NM_001044909]	GO:0004308|GO:0005764	NM_001044909	Dr.79166	559850	ENSDART00000149132	neuraminidase 1	TC388637	98.7355	475.654	7.07088	8.13832
A_15_P194746	-2.70443	-1.43533	2.70443	down	NM_001044332	chr20:42004609-41999652	si:dkeyp-114g9.1	Danio rerio si:dkeyp-114g9.1 (si:dkeyp-114g9.1), mRNA [NM_001044332]		NM_001044332	Dr.78828	555399	ENSDART00000100967	si:dkeyp-114g9.1	TC369992	16.7697	102.195	4.54067	5.976
A_15_P724921	-2.17123	-1.11851	2.17123	down	NM_213168	chr23:3765232-3765184	hmga1a	Danio rerio high mobility group AT-hook 1a (hmga1a), mRNA [NM_213168]	GO:0006355|GO:0005634|GO:0003677|GO:0000785	NM_213168	Dr.75367	406447	ENSDART00000137707	high mobility group AT-hook 1a	TC391075	35487	100944	15.1012	16.2197
A_15_P271681	-2.25421	-1.17262	2.25421	down	EG573599	chr2:53671-52839	LOC100536024	Uncharacterized protein [Source:UniProtKB/TrEMBL;Acc:E7FGW5] [ENSDART00000066767]		XM_003197803	Dr.135435	100536024	ENSDART00000066767	cadherin-2-like	TC390590	9.4051	47.9053	3.72435	4.89698
A_15_P472865	-3.91533	-1.96914	3.91533	down	NM_213316	chr17:750704-750645	arhgap11a	Danio rerio Rho GTPase activating protein 11A (arhgap11a), transcript variant 2, mRNA [NM_213316]	GO:0005622|GO:0007165	NM_213316	Dr.77837	406608	ENSDART00000123403	Rho GTPase activating protein 11A	TC418046	50.0878	460.319	6.12141	8.09054
A_15_P719876	-2.18113	-1.12508	2.18113	down	NM_001034977	chr16:40859326-40859385	pi4kb	Danio rerio phosphatidylinositol 4-kinase, catalytic, beta (pi4kb), mRNA [NM_001034977]	GO:0004430|GO:0006661|GO:0005783|GO:0048015|GO:0005741|GO:0005524|GO:0060872|GO:0005739|GO:0046854|GO:0016310|GO:0005737|GO:0000166|GO:0016020|GO:0016301|GO:0030867|GO:0016773|GO:0016740|GO:0016772	NM_001034977	Dr.48538	563201	ENSDART00000112165	phosphatidylinositol 4-kinase, catalytic, beta	TC445580	79.6718	407.683	6.78033	7.90541
A_15_P149141	-2.74802	-1.45839	2.74802	down	NM_001044916	chr20:43421110-43421169	unc93a	Danio rerio unc-93 homolog A (C. elegans) (unc93a), mRNA [NM_001044916]	GO:0016020|GO:0016021	NM_001044916	Dr.87631	559995	ENSDART00000060915	unc-93 homolog A (C. elegans)	TC374223	14.2397	88.2065	4.30148	5.75987
A_15_P531887	-2.18482	-1.12752	2.18482	down	NM_001002222	chr15:24815514-24815573	pak4	Danio rerio p21 protein (Cdc42/Rac)-activated kinase 4 (pak4), mRNA [NM_001002222]	GO:0016310|GO:0002573|GO:0004672|GO:0000166|GO:0016301|GO:0004674|GO:0006468|GO:0005575|GO:0048598|GO:0005524|GO:0016740|GO:0016772	NM_001002222	Dr.132625	431769	ENSDART00000009545	p21 protein (Cdc42/Rac)-activated kinase 4	TC413811	363.174	1623.12	8.81688	9.94439
A_15_P684061	-2.04488	-1.03202	2.04488	down	NM_001002228	chr3:55759719-55759660	rhbdf1	Danio rerio rhomboid 5 homolog 1 (Drosophila) (rhbdf1), mRNA [NM_001002228]	GO:0005794|GO:0004252|GO:0005783|GO:0008283|GO:0015031|GO:0042058|GO:0000139|GO:0016020|GO:0016477|GO:0019838|GO:0061136|GO:0050709|GO:0005789|GO:0006508|GO:0006810|GO:0016021	NM_001002228	Dr.32169	798402	ENSDART00000053095	rhomboid 5 homolog 1 (Drosophila)	TC408085	128.476	598.422	7.43801	8.47002
A_15_P269791	-8.21566	-3.03838	8.21566	down	NM_001110026	chr14:34537469-34539884	zdhhc9	Danio rerio zinc finger, DHHC-type containing 9 (zdhhc9), mRNA [NM_001110026]	GO:0008270|GO:0046872	NM_001110026	Dr.132960	560095	ENSDART00000085335	zinc finger, DHHC-type containing 9	TC366376	5	69.5609	2.40516	5.44354
A_15_P511372	-2.85855	-1.51528	2.85855	down	NM_001128341	chr19:8210145-8210204	s100u	Danio rerio S100 calcium binding protein U (s100u), mRNA [NM_001128341]	GO:0005509	NM_001128341	Dr.76945	563060	ENSDART00000051528	S100 calcium binding protein U	TC392430	138.162	892.689	7.54014	9.05542
A_15_P198926	-2.06283	-1.04462	2.06283	down	NM_131036	chr2:35262231-35262172	tnw	Danio rerio tenascin W (tnw), mRNA [NM_131036]		NM_131036	Dr.104489	30234	ENSDART00000123700	tenascin W	TC366584	258.313	1138.27	8.37772	9.42234
A_15_P205941	-2.4709	-1.30504	2.4709	down	NM_213358	chr1:055289600-055289917	pi4k2a	Danio rerio phosphatidylinositol 4-kinase type 2 alpha (pi4k2a), mRNA [NM_213358]	GO:0004430|GO:0043005|GO:0030054|GO:0005886|GO:0045202|GO:0042995|GO:0030425|GO:0005739|GO:0005737|GO:0000166|GO:0016301|GO:0016773|GO:0043025|GO:0035651|GO:0031410|GO:0005524|GO:0016310|GO:0042734|GO:0035838|GO:0016020|GO:0031083|GO:0044231|GO:0016023|GO:0045121|GO:0016740|GO:0005768	NM_213358	Dr.79494	406667	ENSDART00000130675	phosphatidylinositol 4-kinase type 2 alpha	TC374177	39.9614	231.432	5.80408	7.10911
A_15_P203436	-2.47596	-1.30799	2.47596	down	NM_131024	chr17:51734370-51734311	psen1	Danio rerio presenilin 1 (psen1), mRNA [NM_131024]	GO:0030424|GO:0048471|GO:0030018|GO:0031594|GO:0007220|GO:0005783|GO:0005743|GO:0031224|GO:0005634|GO:0005765|GO:0030426|GO:0035556|GO:0005739|GO:0001946|GO:0016324|GO:0051563|GO:0007219|GO:0043198|GO:0016485|GO:0043025|GO:0006508|GO:0006816|GO:0006509|GO:0060070|GO:0005938|GO:0045296|GO:0005794|GO:0009986|GO:0030318|GO:0043085|GO:0034205|GO:0061053|GO:0016787|GO:0004175|GO:0000139|GO:0016020|GO:…	NM_131024	Dr.75852	30221	ENSDART00000033514	presenilin 1	TC368771	992.066	4273.77	10.1198	11.4278
A_15_P146761	-2.00004	-1.00003	2.00004	down	NM_131866	chr5:39738626-39737996	gc3	Danio rerio guanylyl cyclase 3 (gc3), mRNA [NM_131866]	GO:0035556|GO:0004672|GO:0016849|GO:0000166|GO:0006182|GO:0006468|GO:0004383|GO:0009190|GO:0005524|GO:0016829|GO:0016772	NM_131866	Dr.86944	140426	ENSDART00000097770	guanylyl cyclase 3	NP395687	14.3787	63.755	4.3149	5.31493
A_15_P656611	-5.57732	-2.47957	5.57732	down	BC055517	chr22:332907-340349		myosin, heavy chain 13, skeletal muscle [Source:HGNC Symbol;Acc:7571] [ENSDART00000130036]			Dr.120009		ENSDART00000130036		NP13228440	200.687	2361.72	8.04455	10.5241
A_15_P117293	-2.06692	-1.04749	2.06692	down	NM_199542	chr1:18292995-18293054	smc2	Danio rerio structural maintenance of chromosomes 2 (smc2), mRNA [NM_199542]	GO:0000796|GO:0007076|GO:0051276|GO:0006281|GO:0030261|GO:0005694|GO:0007062|GO:0006310|GO:0005634|GO:0005524	NM_199542	Dr.24234	321452	ENSDART00000008616	structural maintenance of chromosomes 2	TC366197	608.431	2394.08	9.49695	10.5444
A_15_P551817	-2.96381	-1.56745	2.96381	down	XM_001920844	chr5:45482635-45482576		si:ch211-204c21.1 [Source:ZFIN;Acc:ZDB-GENE-030429-35] [ENSDART00000147252]		XM_001920844			ENSDART00000147252		TC382924	56.5575	393.823	6.2885	7.85596
A_15_P165596	-2.26871	-1.18187	2.26871	down		chr15:27750508-27750820	slc43a2a	solute carrier family 43, member 2a [Source:ZFIN;Acc:ZDB-GENE-040426-964] [ENSDART00000142298]	GO:0016021|GO:0015179|GO:0055085|GO:0015807			393221	ENSDART00000142298	solute carrier family 43, member 2a	TC443440	42.9815	229.115	5.91327	7.09515
A_15_P103313	-2.40705	-1.26727	2.40705	down	NM_001077313	chr8:49873809-49873868	dpp9	Danio rerio dipeptidyl-peptidase 9 (dpp9), mRNA [NM_001077313]	GO:0016020|GO:0006508|GO:0008236	NM_001077313	Dr.11668	768170	ENSDART00000074495	dipeptidyl-peptidase 9	TC389323	371.125	1827.94	8.84859	10.1159
A_15_P628526	-2.33408	-1.22285	2.33408	down	NM_152987	chr6:28615170-28615229	tp63	Danio rerio tumor protein p63 (tp63), transcript variant gamma, mRNA [NM_152987]	GO:0003700|GO:0044212|GO:0010165|GO:0005634|GO:0046872|GO:0030425|GO:0005829|GO:0002039|GO:0043523|GO:0005737|GO:0034644|GO:0003690|GO:0006978|GO:0000785|GO:0010332|GO:0005667|GO:0006355|GO:0051262|GO:0006915|GO:0000122|GO:0007417|GO:0003677|GO:0006351|GO:0043565|GO:0003684|GO:0042771|GO:0007049|GO:0003682|GO:0031571|GO:0045892	NM_152987	Dr.32588	260407	ENSDART00000065137	tumor protein p63	NP13228571	185.913	961.493	7.94349	9.16634
A_15_P146976	-2.81116	-1.49116	2.81116	down	BC152291	chr5:45195749-45205972	LOC798260	Danio rerio cDNA clone IMAGE:7140737. [BC152291]		XM_005165437	Dr.53013	798260	ENSDART00000133006	uncharacterized LOC798260	TC411202	5	24.1143	2.40516	3.89633
A_15_P196251	-3.42822	-1.77746	3.42822	down	NM_199807	chr12:37699224-37699465	nploc4	Danio rerio nuclear protein localization 4 homolog (S. cerevisiae) (nploc4), mRNA [NM_199807]	GO:0008270	NM_199807	Dr.10558	327447	ENSDART00000105516	nuclear protein localization 4 homolog (S. cerevisiae)	TC381360	110.488	862.559	7.22782	9.00528
A_15_P752071	-3.13879	-1.65021	3.13879	down	NM_001076613	chr5:33368136-33367603	fam102ab	Danio rerio family with sequence similarity 102, member Ab (fam102ab), mRNA [NM_001076613]	GO:0008150|GO:0003674|GO:0005575	NM_001076613	Dr.43699	767674	ENSDART00000137556	family with sequence similarity 102, member Ab	TC447727	25.5575	186.428	5.16275	6.81295
A_15_P349585	-5.06325	-2.34007	5.06325	down	XM_682604	chr14:27801786-27801845		AHNAK nucleoprotein [Source:ZFIN;Acc:ZDB-GENE-030131-8719] [ENSDART00000125289]		XM_005173182	Dr.76283		ENSDART00000125289		TC367248	166.369	1846.01	7.79255	10.1326
A_15_P644331	-5.24752	-2.39164	5.24752	down	NM_131160	chr16:34875329-34875388	pou3f2b	Danio rerio POU class 3 homeobox 2b (pou3f2b), mRNA [NM_131160]	GO:0043565|GO:0006355|GO:0003700|GO:0007275|GO:0005634|GO:0003677|GO:0006351	NM_131160	Dr.221	30397	ENSDART00000093250	POU class 3 homeobox 2b	TC366562	79.7851	966.098	6.78338	9.17502
A_15_P434705	-3.27982	-1.71361	3.27982	down	NM_131818	chr6:32040741-32040484	angptl3	Danio rerio angiopoietin-like 3 (angptl3), mRNA [NM_131818]		NM_131818	Dr.3332	114421	ENSDART00000065146	angiopoietin-like 3	TC398450	21.236	160.728	4.8943	6.60791
A_15_P350500	-3.59097	-1.84437	3.59097	down	NM_001145090	chr9:35171536-35171482	dcaf6	Danio rerio ddb1 and cul4 associated factor 6 (dcaf6), mRNA [NM_001145090]		NM_001145090	Dr.86175	564498	ENSDART00000111027	ddb1 and cul4 associated factor 6	TC385965	14.1718	114.893	4.29565	6.14002
A_15_P106950	-2.88507	-1.5286	2.88507	down	NM_001037805	chr3:32024080-32024021	ddx42	Danio rerio DEAD (Asp-Glu-Ala-Asp) box polypeptide 42 (ddx42), mRNA [NM_001037805]	GO:0008026|GO:0016787|GO:0000166|GO:0004386|GO:0005575|GO:0003676|GO:0005524	NM_001037805	Dr.81895	503932	ENSDART00000055276	DEAD (Asp-Glu-Ala-Asp) box polypeptide 42	TC405396	78.4659	527.055	6.7613	8.2899
A_15_P512487	-3.29978	-1.72237	3.29978	down	XM_005157557	Zv9_NA501:37593-37533		Rep: Polymerase polyprotein - Lampetra fluviatilis (River lamprey), partial (28%) [TC383093]		XM_005157557					TC383093	14.3274	106.131	4.31093	6.0333
A_15_P750746	-8.61087	-3.10616	8.61087	down	NM_001080563	chr1:25346687-25346746	g3bp2	Danio rerio GTPase activating protein (SH3 domain) binding protein 2 (g3bp2), mRNA [NM_001080563]	GO:0005622|GO:0000166|GO:0006810|GO:0003676	NM_001080563	Dr.6807	556409	ENSDART00000046376	GTPase activating protein (SH3 domain) binding protein 2	TC397982	102.114	1958.96	7.11943	10.2256
A_15_P546417	-2.39788	-1.26176	2.39788	down	NM_178298	chr2:27548690-27548749	sepp1b	Danio rerio selenoprotein P, plasma, 1b (sepp1b), mRNA [NM_178298]	GO:0008430|GO:0005576	NM_178298	Dr.8516	791479	ENSDART00000124941	selenoprotein P, plasma, 1b	NP13228437	2050.65	7796.29	11.0576	12.3193
A_15_P109289	-2.36784	-1.24357	2.36784	down	BC088382	chr5:28510675-28510767	araf	v-raf murine sarcoma 3611 viral oncogene homolog [Source:ZFIN;Acc:ZDB-GENE-050102-2] [ENSDART00000076696]	GO:0046332|GO:0005524|GO:0046872|GO:1900108|GO:0035556|GO:0007165|GO:0016310|GO:0004672|GO:0000166|GO:0004674|GO:0016301|GO:0006468|GO:0060389|GO:0005057|GO:0016740|GO:0016772		Dr.77625	403063	ENSDART00000076696	v-raf murine sarcoma 3611 viral oncogene homolog	TC370848	62.1406	343.542	6.42932	7.67289
A_15_P242362	-2.26998	-1.18268	2.26998	down	XM_001335166	chr21:18732363-18732304	mfhas1	malignant fibrous histiocytoma amplified sequence 1 [Source:ZFIN;Acc:ZDB-GENE-080917-20] [ENSDART00000114969]	GO:0000166|GO:0007264|GO:0005525	XM_001335166		797005	ENSDART00000114969	malignant fibrous histiocytoma amplified sequence 1	TC393701	17.1193	87.9343	4.57439	5.75706
A_15_P279156	-2.34404	-1.22899	2.34404	down	NM_200940	chr10:40494500-40493261	slc37a4b	Danio rerio solute carrier family 37 (glucose-6-phosphate transporter), member 4b (slc37a4b), mRNA [NM_200940]	GO:0005215|GO:0006810|GO:0016021|GO:0055085	NM_200940	Dr.82635	393914	ENSDART00000148825	solute carrier family 37 (glucose-6-phosphate transporter), member 4b	TC427886	48.4373	266.005	6.07368	7.30268
A_15_P546857	-2.03874	-1.02768	2.03874	down	NM_001089354	chr6:18683917-18683976	gga3	Danio rerio golgi associated, gamma adaptin ear containing, ARF binding protein 3 (gga3), mRNA [NM_001089354]	GO:0005802|GO:0005622|GO:0030131|GO:0030306|GO:0016192|GO:0006886	NM_001089354	Dr.41140	492643	ENSDART00000102986	golgi associated, gamma adaptin ear containing, ARF binding protein 3	TC408088	106.786	500.423	7.1813	8.20898
A_15_P167772	-14.3656	-3.84454	14.3656	down	NM_001100051	chr18:21812516-21812457	pard6a	Danio rerio par-6 partitioning defective 6 homolog alpha (C. elegans) (pard6a), mRNA [NM_001100051]	GO:0016324|GO:0001841	NM_001100051	Dr.148564	792828	ENSDART00000100904	par-6 partitioning defective 6 homolog alpha (C. elegans)	TC375845	5	124.186	2.40516	6.24971
A_15_P475250	-2.82495	-1.49822	2.82495	down	NM_001008732	chr11:1487571-1489110	srsf6b	Danio rerio serine/arginine-rich splicing factor 6b (srsf6b), mRNA [NM_001008732]	GO:0000166|GO:0003676	NM_001008732	Dr.76948	494133	ENSDART00000139079	serine/arginine-rich splicing factor 6b	TC416731	341.702	1975.19	8.73771	10.2359
A_15_P203406	-2.00109	-1.00078	2.00109	down	NM_199658	chr17:41580744-41580803	insm1b	Danio rerio insulinoma-associated 1b (insm1b), mRNA [NM_199658]	GO:0003676|GO:0046872	NM_199658	Dr.78397	323882	ENSDART00000075331	insulinoma-associated 1b	TC373654	215.269	944.048	8.13509	9.13587
A_15_P676206	-2.05845	-1.04156	2.05845	down	NM_001128745	chr7:30358026-30357967	nrn1lb	Danio rerio neuritin 1-like b (nrn1lb), mRNA [NM_001128745]	GO:0003674|GO:0005575|GO:0007399	NM_001128745	Dr.82800	568997	ENSDART00000086905	neuritin 1-like b	TC400567	15.6376	71.7347	4.44529	5.48685
A_15_P120289	-2.11961	-1.0838	2.11961	down	NM_131808	chr1:6799253-6799312	efnb2b	Danio rerio ephrin B2b (efnb2b), mRNA [NM_131808]	GO:0016020	NM_131808	Dr.12618	114402	ENSDART00000023180	ephrin B2b	TC405016	97.6801	476.322	7.05703	8.14083
A_15_P656726	-2.38422	-1.25352	2.38422	down	NM_001031676	chr16:58364957-58365016	pabpc1a	Danio rerio poly A binding protein, cytoplasmic 1 a (pabpc1a), mRNA [NM_001031676]	GO:0007507|GO:0000166|GO:0003723|GO:0003676	NM_001031676	Dr.24504	606498	ENSDART00000149603	poly A binding protein, cytoplasmic 1 a	TC433596	11705.7	39609.4	13.4386	14.6921
A_15_P483890	-2.10127	-1.07126	2.10127	down	NM_001142375	chr12:35430863-35430922	trim8b	Danio rerio tripartite motif containing protein 8 (trim8b), mRNA [NM_001142375]		NM_001142375	Dr.159764	797338	ENSDART00000085888	tripartite motif containing protein 8	TC365888	1132.28	4100.32	10.2909	11.3621
A_15_P580342	-4.96835	-2.31277	4.96835	down	NM_001082481	chr8:47204932-47204108	zgc:158399	Danio rerio zgc:158399 (zgc:158399), mRNA [NM_001082481]	GO:0008150|GO:0003674|GO:0005575	NM_001082481	Dr.47698	570789	ENSDART00000084241	zgc:158399	TC423309	364.745	3530.74	8.82345	11.1362
A_15_P131546	-2.71316	-1.43997	2.71316	down	NM_130941	chr6:59575226-59575285	pl10	Danio rerio pl10 (pl10), mRNA [NM_130941]	GO:0008026|GO:0016787|GO:0000166|GO:0004386|GO:0003676|GO:0005524	NM_130941	Dr.75779	30116	ENSDART00000102148	pl10	TC407749	1692.98	7381.68	10.7991	12.2391
A_15_P439985	-2.17166	-1.1188	2.17166	down	NM_001110473	chr23:21945015-21945074	igsf21b	Danio rerio immunoglobin superfamily, member 21b (igsf21b), mRNA [NM_001110473]	GO:0005515|GO:0008150|GO:0005575	NM_001110473	Dr.85351	567714	ENSDART00000104188	immunoglobin superfamily, member 21b	TC417766	5	19.0522	2.40516	3.52397
A_15_P731701	-2.32921	-1.21984	2.32921	down	NM_001130601	chr16:34614748-34613933	mms22l	Danio rerio MMS22-like, DNA repair protein (mms22l), mRNA [NM_001130601]	GO:0042555|GO:0035101|GO:0006281|GO:0000724|GO:0031297|GO:0005634|GO:0043596|GO:0006974	NM_001130601	Dr.79045	563411	ENSDART00000110263	MMS22-like, DNA repair protein	TC412676	32.4845	174.416	5.50392	6.72376
A_15_P182466	-3.15717	-1.65863	3.15717	down	FN665786	chr19:16083531-16083590	ptprua	protein tyrosine phosphatase, receptor type, U, a [Source:ZFIN;Acc:ZDB-GENE-060503-232] [ENSDART00000092510]	GO:0016791|GO:0006470|GO:0016787|GO:0016020|GO:0016311|GO:0004721|GO:0004725	XM_005159552	Dr.119339	563584	ENSDART00000092510	protein tyrosine phosphatase, receptor type, U, a	TC414440	76.9796	565.66	6.73456	8.39319
A_15_P746991	-2.60926	-1.38364	2.60926	down	NM_131455	chr21:29540985-29539338	rrm1	Danio rerio ribonucleotide reductase M1 polypeptide (rrm1), mRNA [NM_131455]	GO:0006260|GO:0005737|GO:0009263|GO:0000166|GO:0008152|GO:0016491|GO:0005971|GO:0004748|GO:0003824|GO:0005524|GO:0055114	NM_131455	Dr.33356	30740	ENSDART00000012091	ribonucleotide reductase M1 polypeptide	TC434931	6950.21	25779	12.702	14.0856
A_15_P117966	-2.02609	-1.0187	2.02609	down	NM_001008655	chr8:8038496-8038367	cdk20	Danio rerio cyclin-dependent kinase 20 (cdk20), mRNA [NM_001008655]	GO:0005634|GO:0007275|GO:0042995|GO:0005524|GO:0005929|GO:0016310|GO:0005737|GO:0007049|GO:0004672|GO:0000166|GO:0004674|GO:0016301|GO:0060271|GO:0006468|GO:0016740|GO:0051301|GO:0016772|GO:0004693	NM_001008655	Dr.37814	494112	ENSDART00000021607	cyclin-dependent kinase 20	NP13226015	17.0693	77.1304	4.57025	5.58894
A_15_P422320	-2.15459	-1.10741	2.15459	down	NM_182859	chr16:16680092-16680033	crabp2a	Danio rerio cellular retinoic acid binding protein 2, a (crabp2a), mRNA [NM_182859]	GO:0005215|GO:0006810|GO:0008289	NM_182859	Dr.104443	171480	ENSDART00000059972	cellular retinoic acid binding protein 2, a	TC425942	1031.78	3864.33	10.1674	11.2748
A_15_P731526	-2.66201	-1.41252	2.66201	down	NM_200405	chr15:24847143-24847084	hif1al	Danio rerio hypoxia-inducible factor 1, alpha subunit, like (hif1al), mRNA [NM_200405]	GO:0014823|GO:0007165|GO:0005667|GO:0006355|GO:0005737|GO:0003700|GO:0046983|GO:0005634|GO:0004871|GO:0051402|GO:0003677|GO:0006351	NM_200405	Dr.11978	393376	ENSDART00000023421	hypoxia-inducible factor 1, alpha subunit, like	TC404499	737.94	3568.13	9.74206	11.1546
A_15_P119337	-3.27222	-1.71027	3.27222	down	NM_001005391	chr10:28995375-28994095	cltca	Danio rerio clathrin, heavy polypeptide a (Hc) (cltca), mRNA [NM_001005391]	GO:0030132|GO:0005198|GO:0030130|GO:0016192|GO:0006886	NM_001005391	Dr.77490	323579	ENSDART00000063849	clathrin, heavy polypeptide a (Hc)	TC403433	1753.03	9189.96	10.8449	12.5552
A_15_P277871	-3.98971	-1.99629	3.98971	down	NM_200953	chr13:15823234-15823293	klc1a	Danio rerio kinesin light chain 1a (klc1a), mRNA [NM_200953]	GO:0005871|GO:0003777	NM_200953	Dr.133205	393928	ENSDART00000010560	kinesin light chain 1a	TC403544	6.36305	56.416	3.14033	5.13661
A_15_P755946	-3.52477	-1.81753	3.52477	down	NM_001145615	chr13:13955552-13957987	atrn	Danio rerio attractin (atrn), mRNA [NM_001145615]	GO:0016020|GO:0030246|GO:0016021	NM_001145615	Dr.81745	794975	ENSDART00000089528	attractin	TC452757	9.28774	73.636	3.70066	5.51819
A_15_P156961	-3.33627	-1.73823	3.33627	down	NM_001245967	chr24:31254559-31254500	f3a	Danio rerio coagulation factor IIIa (f3a), mRNA [NM_001245967]	GO:0007596|GO:0016021	NM_001245967	Dr.89542	567257	ENSDART00000020673	coagulation factor IIIa	TC377363	7.01764	51.73	3.27445	5.01268
A_15_P709711	-2.24227	-1.16496	2.24227	down	NM_201062	chr10:25970494-25970329	cct8	Danio rerio chaperonin containing TCP1, subunit 8 (theta) (cct8), mRNA [NM_201062]	GO:0035095|GO:0005737|GO:0000166|GO:0006457|GO:0051082|GO:0044267|GO:0005524	NM_201062	Dr.75181	394037	ENSDART00000009477	chaperonin containing TCP1, subunit 8 (theta)	TC382845	10402.7	32707.5	13.2631	14.428
A_15_P138941	-2.60655	-1.38214	2.60655	down	NM_001089455	chr22:27411007-27411066		CREB binding protein a [Source:ZFIN;Acc:ZDB-GENE-050208-439] [ENSDART00000087250]		XM_005161769	Dr.41906		ENSDART00000087250		TC367956	37.5245	230.152	5.71888	7.10102
A_15_P716471	-2.42758	-1.27952	2.42758	down	NM_001003746	chr10:40048112-40040243	acat1	Danio rerio acetyl-Coenzyme A acetyltransferase 1 (acetoacetyl Coenzyme A thiolase) (acat1), mRNA [NM_001003746]	GO:0005739|GO:0016747|GO:0016746|GO:0008152|GO:0003985|GO:0003824|GO:0046872|GO:0016740	NM_001003746	Dr.77084	445290	ENSDART00000067448	acetyl-Coenzyme A acetyltransferase 1 (acetoacetyl Coenzyme A thiolase)	TC387001	100.067	557.484	7.09117	8.37069
A_15_P418710	-5.50033	-2.45952	5.50033	down	NM_001135103	chr21:39312511-39312570	ssh2b	Danio rerio slingshot homolog 2b (Drosophila) (ssh2b), mRNA [NM_001135103]	GO:0016791|GO:0006470|GO:0016787|GO:0016311|GO:0008138|GO:0005575|GO:0003677|GO:0004725	NM_001135103	Dr.131862	557912	ENSDART00000113436	slingshot homolog 2b (Drosophila)	TC365433	5	46.8826	2.40516	4.86468
A_15_P215236	-3.26091	-1.70528	3.26091	down	NM_199574	chr19:17158536-17158477	srsf4	Danio rerio serine/arginine-rich splicing factor 4 (srsf4), mRNA [NM_199574]	GO:0000166|GO:0005575|GO:0003676	NM_199574	Dr.4165	321872	ENSDART00000105219	serine/arginine-rich splicing factor 4	TC381112	1388.24	7403.33	10.5378	12.243
A_15_P415410	-4.22364	-2.07849	4.22364	down	NM_214746	chr6:274192-275084	rbfox2	Danio rerio RNA binding protein, fox-1 homolog (C. elegans) 2 (rbfox2), mRNA [NM_214746]	GO:0048739|GO:0000166|GO:0048741|GO:0043484|GO:0003676	NM_214746	Dr.10524	406569	ENSDART00000073985	RNA binding protein, fox-1 homolog (C. elegans) 2	TC410831	23.9411	237.503	5.06676	7.14525
A_15_P494787	-2.87631	-1.52422	2.87631	down	NM_001077541	chr1:40965291-40965250	clgn	Danio rerio calmegin (clgn), mRNA [NM_001077541]	GO:0006457|GO:0005783|GO:0005509|GO:0051082	NM_001077541	Dr.80864	556495	ENSDART00000101671	calmegin	TC418796	71.5024	479.053	6.62614	8.15036
A_15_P342185	-3.09786	-1.63127	3.09786	down	BC081616	chr19:45152939-45152881	yrk	Yes-related kinase [Source:ZFIN;Acc:ZDB-GENE-030131-9517] [ENSDART00000148287]	GO:0016310|GO:0004672|GO:0000166|GO:0016301|GO:0006468|GO:0004713|GO:0005524|GO:0016740|GO:0016772		Dr.79866	337571	ENSDART00000148287	Yes-related kinase	TC392933	54.2891	396.692	6.23434	7.86561
A_15_P100961	-2.99457	-1.58235	2.99457	down	NM_213450	chr8:18554592-18554651	ssbp3b	Danio rerio single stranded DNA binding protein 3b (ssbp3b), mRNA [NM_213450]	GO:0003697|GO:0005634|GO:0003677	NM_213450	Dr.77852	406759	ENSDART00000121984	single stranded DNA binding protein 3b	TC436656	694.515	3784.31	9.66534	11.2477
A_15_P345310	-2.74171	-1.45508	2.74171	down	NM_200923	chr10:15306151-15311383	vldlr	Danio rerio very low density lipoprotein receptor (vldlr), mRNA [NM_200923]	GO:0016020|GO:0005509|GO:0016021	NM_200923	Dr.82354	393897	ENSDART00000138761	very low density lipoprotein receptor	TC401680	17.9362	111.529	4.64861	6.10369
A_15_P759446	-2.03863	-1.0276	2.03863	down		chr6:24565486-24565427		GB							NP13319557	14.7905	66.5822	4.35653	5.38413
A_15_P117251	-2.25213	-1.17129	2.25213	down	NM_131012	chr18:20033225-20033284	gro2	Danio rerio groucho 2 (gro2), mRNA [NM_131012]	GO:0005515|GO:0006355|GO:1900052|GO:0005634	NM_131012	Dr.659	30206	ENSDART00000025018	groucho 2	TC381148	96.9363	503.035	7.04643	8.21772
A_15_P584177	-2.16187	-1.11228	2.16187	down	NM_207081	chr23:25219909-25219968	klhl21	Danio rerio kelch-like 21 (Drosophila) (klhl21), mRNA [NM_207081]	GO:0005827|GO:0007067|GO:0007049|GO:0005737|GO:0004842|GO:0032465|GO:0016567|GO:0035853|GO:0031463|GO:0005856|GO:0051301	NM_207081	Dr.85564	404613	ENSDART00000057357	kelch-like 21 (Drosophila)	TC397268	41.9469	212.958	5.87842	6.9907
A_15_P608132	-2.29029	-1.19553	2.29029	down		chr6:15963338-15963279	agap1	ArfGAP with GTPase domain, ankyrin repeat and PH domain 9 [Source:HGNC Symbol;Acc:23463] [ENSDART00000089445]				100148154	ENSDART00000089445	ArfGAP with GTPase domain, ankyrin repeat and PH domain 1	TC385424	89.3097	473.051	6.93518	8.13072
A_15_P224136	-21.1758	-4.40434	21.1758	down	NM_201474	chr6:26597578-26597064	hdlbpa	Danio rerio high density lipoprotein-binding protein (vigilin) (hdlbp), mRNA [NM_201474]	GO:0003723|GO:0071391	NM_201474	Dr.76082	794178	ENSDART00000134259	high density lipoprotein-binding protein a	TC422053	14.9567	736.664	4.37425	8.7786
A_15_P109266	-4.04091	-2.01468	4.04091	down	NM_001077549	chr10:35779410-35772653	dclk1a	Danio rerio doublecortin-like kinase 1a (dclk1a), mRNA [NM_001077549]	GO:0035556|GO:0016310|GO:0004672|GO:0000166|GO:0016301|GO:0004674|GO:0006468|GO:0005524|GO:0016740|GO:0016772	NM_001077549	Dr.78987	558997	ENSDART00000123957	doublecortin-like kinase 1a	TC387278	12.9101	117.999	4.16631	6.18099
A_15_P659616	-2.19495	-1.13419	2.19495	down	NM_001015060	chr17:15378141-15378200	marcksb	Danio rerio myristoylated alanine rich protein kinase C substrate b (marcksb), mRNA [NM_001015060]	GO:0016310|GO:0005516|GO:0060541|GO:0016301|GO:0007420|GO:0010842|GO:0005575|GO:0035914|GO:0016740	NM_001015060	Dr.75599	323201	ENSDART00000002932	myristoylated alanine rich protein kinase C substrate b	TC420264	5379.25	17393.4	12.3488	13.483
A_15_P102584	-14.2978	-3.83773	14.2978	down	NM_212987	chr25:30439863-30439804	ube2q2	Danio rerio ubiquitin-conjugating enzyme E2Q family member 2 (ube2q2), mRNA [NM_212987]	GO:0016881|GO:0005575	NM_212987	Dr.79829	406260	ENSDART00000124645	ubiquitin-conjugating enzyme E2Q family member 2	TC392955	11.2129	378.072	3.96386	7.80159
A_15_P130861	-2.57307	-1.36349	2.57307	down	NM_131121	chr3:23969176-23969235	hoxb9a	Danio rerio homeo box B9a (hoxb9a), mRNA [NM_131121]	GO:0043565|GO:0006355|GO:0003700|GO:0007275|GO:0005634|GO:0003677|GO:0006351	NM_131121	Dr.75786	30344	ENSDART00000023674	homeo box B9a	TC384802	355.649	1873.17	8.79223	10.1557
A_15_P443630	-2.29563	-1.19889	2.29563	down	NM_001100958	chr15:36259535-36259594	hspb6	Danio rerio heat shock protein, alpha-crystallin-related, b6 (hspb6), mRNA [NM_001100958]	GO:0006950	NM_001100958	Dr.154520	792610	ENSDART00000085522	heat shock protein, alpha-crystallin-related, b6	TC427345	29.4802	156.218	5.36551	6.5644
A_15_P623401	-2.05696	-1.04051	2.05696	down	NM_001113619	chr24:6423025-6422966	zgc:174877	Danio rerio zgc:174877 (zgc:174877), mRNA [NM_001113619]	GO:0015074|GO:0006310|GO:0005575|GO:0003677	NM_001113619	Dr.90885	570025	ENSDART00000130340	zgc:174877	TC371274	47.5799	228.518	6.05188	7.09239
A_15_P515886	-2.42594	-1.27854	2.42594	down	BC091821	chr14:18593471-18593281	ogt.2	O-linked N-acetylglucosamine (GlcNAc) transferase, tandem duplicate 2 [Source:ZFIN;Acc:ZDB-GENE-051128-1] [ENSDART00000148252]	GO:0016262	XM_001921508	Dr.77267	652952	ENSDART00000148252	O-linked N-acetylglucosamine (GlcNAc) transferase, tandem duplicate 2	TC413559	504.459	2370.4	9.25114	10.5297
A_15_P333449	-2.21803	-1.14928	2.21803	down	NM_212774	chr1:9127943-9128104	fgb	Danio rerio fibrinogen, B beta polypeptide (fgb), mRNA [NM_212774]	GO:0007165|GO:0051258|GO:0005102|GO:0030168|GO:0005577|GO:0030674	NM_212774	Dr.8505	337315	ENSDART00000144756	fibrinogen, B beta polypeptide	TC425170	100.414	512.159	7.09515	8.24443
A_15_P132696	-6.68167	-2.74021	6.68167	down	NM_001098487	chr14:15418002-15417849	selt2	Danio rerio selenoprotein T, 2 (selt2), mRNA [NM_001098487]	GO:0008430|GO:0045454	NM_001098487	Dr.78130	352917	ENSDART00000065002	selenoprotein T, 2	TC450708	698.389	8318.56	9.6714	12.4116
A_15_P104231	-2.21425	-1.14682	2.21425	down	NM_001044946	chr20:43733438-43734051	lin9	Danio rerio lin-9 homolog (C. elegans) (lin9), mRNA [NM_001044946]	GO:0007049|GO:0017053|GO:0051726|GO:0005634|GO:0006351	NM_001044946	Dr.76676	560867	ENSDART00000100638	lin-9 homolog (C. elegans)	NP13228495	86.1814	444.141	6.88886	8.03568
A_15_P213829	-2.47891	-1.30971	2.47891	down	NM_001030124	chr20:43105338-43105166	snx9b	Danio rerio sorting nexin 9b (snx9b), mRNA [NM_001030124]	GO:0007154|GO:0035091	NM_001030124	Dr.132718	558917	ENSDART00000060982	sorting nexin 9b	TC440804	92.5953	528.09	6.9823	8.292
A_15_P198841	-2.5445	-1.34738	2.5445	down	NM_001161340	chr2:30664759-30664818	myom1a	Danio rerio myomesin 1a (skelemin) (myom1a), mRNA [NM_001161340]	GO:0008150|GO:0003674|GO:0005575	NM_001161340	Dr.78092	558671	ENSDART00000087126	myomesin 1a (skelemin)	TC416571	302.446	1616.54	8.58866	9.93604
A_15_P687066	-5.64431	-2.4968	5.64431	down	NM_001077308	chr24:32405446-32405387	dpyda	Danio rerio dihydropyrimidine dehydrogenase a (dpyda), mRNA [NM_001077308]	GO:0051536	NM_001077308	Dr.19758	768165	ENSDART00000105730	dihydropyrimidine dehydrogenase a	TC429199	5	48.099	2.40516	4.90196
A_15_P202191	-2.76265	-1.46605	2.76265	down	BC095271	chr9:16366367-16391549		myosin IB [Source:ZFIN;Acc:ZDB-GENE-030131-695] [ENSDART00000077186]		XM_001920924	Dr.75412		ENSDART00000077186		TC376956	15.8537	99.3241	4.46672	5.93277
A_15_P719646	-2.29875	-1.20085	2.29875	down	NM_001017359	chr14:18625464-18625405	ogt.1	Danio rerio O-linked N-acetylglucosamine (GlcNAc) transferase, tandem duplicate 1 (ogt.1), transcript variant 1, mRNA [NM_001017359]	GO:0006493|GO:0016262|GO:0016740	NM_001017359	Dr.105209	337685	ENSDART00000080496	O-linked N-acetylglucosamine (GlcNAc) transferase, tandem duplicate 1	TC366729	5226.94	17708.4	12.3123	13.5131
A_15_P116952	-2.48098	-1.31091	2.48098	down	NM_212644	chr4:15723072-15722629	dennd5b	Danio rerio DENN/MADD domain containing 5B (dennd5b), mRNA [NM_212644]	GO:0005085|GO:0017112|GO:0005262|GO:0050982|GO:0016020|GO:0016021	NM_212644	Dr.77167	323528	ENSDART00000133837	DENN/MADD domain containing 5B	TC418768	26.2762	150.691	5.20621	6.51712
A_15_P158391	-2.51705	-1.33173	2.51705	down	NM_001045134	chr10:43382763-43382822	setd1ba	Danio rerio SET domain containing 1B, a (setd1ba), mRNA [NM_001045134]	GO:0006355|GO:0005694|GO:0003723|GO:0008168|GO:0005634|GO:0003676|GO:0032259|GO:0006351|GO:0018024|GO:0000166|GO:0016607|GO:0016740|GO:0016568	NM_001045134	Dr.80156	567970	ENSDART00000086165	SET domain containing 1B, a	TC365492	61.1758	359.582	6.40418	7.73591
A_15_P685516	-2.25397	-1.17247	2.25397	down	NM_001114628	chr13:16235286-16235227	vwc2	Danio rerio von Willebrand factor C domain containing 2 (vwc2), mRNA [NM_001114628]	GO:0007399	NM_001114628	Dr.154648	798521	ENSDART00000110237	von Willebrand factor C domain containing 2	TC377992	5	19.6837	2.40516	3.57763
A_15_P490662	-2.44769	-1.29142	2.44769	down	XM_001341168	chr8:13707327-13707268	LOC100001136	si:ch73-61d6.3 [Source:ZFIN;Acc:ZDB-GENE-091204-109] [ENSDART00000142224]		XM_001341168		100001136	ENSDART00000142224	occludin-like	TC388801	31.8903	180.423	5.47628	6.7677
A_15_P297361	-3.52623	-1.81813	3.52623	down		chr7:75265739-75265680	LOC560686	methyltransferase like 4 [Source:HGNC Symbol;Acc:24726] [ENSDART00000128678]				560686	ENSDART00000128678	methyltransferase-like protein 4-like	TC389685	23.2024	190.338	5.0204	6.83853
A_15_P734226	-2.19834	-1.13641	2.19834	down	NM_001082798	chr6:52170805-52170864	ywhaba	Danio rerio tyrosine 3-monooxygenase/tryptophan 5-monooxygenase activation protein, beta polypeptide a (ywhaba), mRNA [NM_001082798]	GO:0005737|GO:0019904|GO:0006911	NM_001082798	Dr.77005	323055	ENSDART00000143458	tyrosine 3-monooxygenase/tryptophan 5-monooxygenase activation protein, beta polypeptide a	TC401485	4352.94	14186	12.0547	13.1912
A_15_P726736	-2.31419	-1.21051	2.31419	down	NM_001002586	chr21:38023168-38025918	cryba1b	Danio rerio crystallin, beta A1b (cryba1b), mRNA [NM_001002586]	GO:0008150|GO:0003674|GO:0005575	NM_001002586	Dr.29899	436859	ENSDART00000140644	crystallin, beta A1b	TC427603	391.584	1842	8.91804	10.1285
A_15_P730201	-2.5199	-1.33337	2.5199	down	NM_131069	chr9:47610507-47610448	cx43.4	Danio rerio connexin 43.4 (cx43.4), mRNA [NM_131069]	GO:0030054|GO:0007154|GO:0016020|GO:0005886|GO:0005921|GO:0005922|GO:0016021	NM_131069	Dr.18287	30276	ENSDART00000009790	connexin 43.4	TC401529	3943.68	14887.9	11.9241	13.2574
A_15_P185976	-2.31349	-1.21007	2.31349	down	NM_213505	chr6:42302839-42302780	emc3	Danio rerio ER membrane protein complex subunit 3 (emc3), mRNA [NM_213505]	GO:0072546|GO:0005794|GO:0060041|GO:0016020|GO:0016021|GO:0045494|GO:0030140	NM_213505	Dr.80620	406826	ENSDART00000025441	ER membrane protein complex subunit 3	TC375822	433.527	2019.13	9.06041	10.2705
A_15_P622701	-2.06858	-1.04864	2.06858	down	NM_200002	chr6:28660174-28660115	tomm70a	Danio rerio translocase of outer mitochondrial membrane 70 homolog A (yeast) (tomm70a), mRNA [NM_200002]		NM_200002	Dr.78267	572969	ENSDART00000041998	translocase of outer mitochondrial membrane 70 homolog A (yeast)	TC398307	280.554	1233.76	8.49453	9.54317
A_15_P544532	-2.65925	-1.41102	2.65925	down	NM_001077160	chr12:15260372-15260431	kbtbd2	Danio rerio kelch repeat and BTB (POZ) domain containing 2 (kbtbd2), mRNA [NM_001077160]	GO:0008150|GO:0005575	NM_001077160	Dr.83672	563254	ENSDART00000123741	kelch repeat and BTB (POZ) domain containing 2	TC403726	206.241	1191.46	8.07846	9.48948
A_15_P413025	-2.02684	-1.01924	2.02684	down	NM_001013460	chr13:9210058-9210117	prdx3	Danio rerio peroxiredoxin 3 (prdx3), mRNA [NM_001013460]	GO:0016209|GO:0016491|GO:0051920|GO:0055114	NM_001013460	Dr.9770	373079	ENSDART00000140504	peroxiredoxin 3	NP13228483	3550.8	10907.2	11.786	12.8052
A_15_P101065	-2.72385	-1.44565	2.72385	down	NM_131184	chr13:30011661-30011720	pax2a	Danio rerio paired box gene 2a (pax2a), mRNA [NM_131184]	GO:0006355|GO:0072114|GO:0060113|GO:0035775|GO:0001708|GO:0001822|GO:0048793|GO:0005634|GO:0007275|GO:0021549|GO:0030878|GO:0009952|GO:0003677|GO:0048596|GO:0030154|GO:0006351|GO:0021588|GO:0007399|GO:0009880|GO:0007422|GO:0030917|GO:0043049|GO:0030901|GO:0030902	NM_131184	Dr.75076	30425	ENSDART00000076992	paired box gene 2a	NP002615	30.5671	193.297	5.41504	6.86069
A_15_P222096	-2.14532	-1.10119	2.14532	down	XM_005165961	chr6:29027028-29027018	tmem131	transmembrane protein 131 [Source:HGNC Symbol;Acc:30366] [ENSDART00000078665]		XM_005165961		557719	ENSDART00000078665	transmembrane protein 131		532.841	2233.64	9.33154	10.4327
A_15_P749001	-2.75041	-1.45965	2.75041	down	NM_199645	chr21:19845395-19845336	eif4ebp1	Danio rerio eukaryotic translation initiation factor 4E binding protein 1 (eif4ebp1), mRNA [NM_199645]	GO:0008190|GO:0045947|GO:0005575	NM_199645	Dr.78343	799566	ENSDART00000064032	eukaryotic translation initiation factor 4E binding protein 1	TC438666	2333.51	10075	11.2244	12.6841
A_15_P502912	-3.20025	-1.67819	3.20025	down	NM_131355	chr18:20217031-20217004	kif23	Danio rerio kinesin family member 23 (kif23), mRNA [NM_131355]	GO:0008017|GO:0000281|GO:0005874|GO:0005634|GO:0003777|GO:0005524|GO:0032154|GO:0036089|GO:0005737|GO:0000166|GO:0040016|GO:0047496|GO:0007018	NM_131355	Dr.80609	30627	ENSDART00000129688	kinesin family member 23	TC398904	45.1102	340.577	5.98129	7.65948
A_15_P729686	-4.73293	-2.24273	4.73293	down	NM_213722	chr25:3362859-3363155	slc25a3b	Danio rerio solute carrier family 25 (mitochondrial carrier; phosphate carrier), member 3b (slc25a3b), mRNA [NM_213722]	GO:0016020|GO:0006810|GO:0016021	NM_213722	Dr.144274	322362	ENSDART00000142120	solute carrier family 25 (mitochondrial carrier; phosphate carrier), member 3b	TC414058	2331.09	17167.4	11.2228	13.4655
A_15_P172556	-2.22256	-1.15222	2.22256	down	NM_001024653	chr20:22349226-22349285	kdr	Danio rerio kinase insert domain receptor (a type III receptor tyrosine kinase) (kdr), mRNA [NM_001024653]	GO:0005515|GO:0030054|GO:0005886|GO:0005634|GO:0030154|GO:0000166|GO:0016301|GO:0005021|GO:0016772|GO:0048010|GO:0007275|GO:0001525|GO:0005524|GO:0016310|GO:0004672|GO:0016020|GO:0005887|GO:0016023|GO:0006468|GO:0004713|GO:0016021|GO:0004714|GO:0007169|GO:0005769|GO:0016740	NM_001024653	Dr.91385	554230	ENSDART00000049204	kinase insert domain receptor (a type III receptor tyrosine kinase)	TC365517	47.0121	244.676	6.0334	7.18563
A_15_P236026	-2.94023	-1.55593	2.94023	down	NM_182869		hic2	Danio rerio hypermethylated in cancer 2 (hic2), mRNA [NM_182869]	GO:0006355|GO:0005634|GO:0003676|GO:0003677|GO:0046872|GO:0006351	NM_182869	Dr.78385	359828		hypermethylated in cancer 2	NP13228836	18.5335	124.401	4.69666	6.25259
A_15_P254246	-6.521	-2.70509	6.521	down	NM_213235	chr19:31601278-31601219	khdrbs1b	Danio rerio KH domain containing, RNA binding, signal transduction associated 1b (khdrbs1b), mRNA [NM_213235]	GO:0003723	NM_213235	Dr.162044	406516	ENSDART00000103471	KH domain containing, RNA binding, signal transduction associated 1b	TC398372	261.105	3427.96	8.38963	11.0947
A_15_P344795	-2.27152	-1.18366	2.27152	down	NM_001143840	chr10:1920257-1920316	apc	Danio rerio adenomatosis polyposis coli (apc), mRNA [NM_001143840]	GO:0008017|GO:0001754|GO:0045859|GO:0008013|GO:0060041|GO:0030877|GO:0001947|GO:0003306|GO:0061380|GO:0003146|GO:0044030|GO:0016055|GO:0005813|GO:1900052|GO:0000281|GO:0003170|GO:0001889|GO:0048384|GO:0001501|GO:0000776|GO:0030917|GO:0031290|GO:0055123|GO:0008285|GO:0030178|GO:0005634|GO:0090244|GO:0030426|GO:0019887|GO:0005737|GO:0030855|GO:0007050|GO:0048920|GO:0007051|GO:0090090|GO:0022006|GO:…	NM_001143840	Dr.76198	386762	ENSDART00000044432	adenomatosis polyposis coli	TC371764	847.574	3429.33	9.91177	11.0954
A_15_P564042	-5.29811	-2.40548	5.29811	down	NM_001145584	chr13:12824481-12824540	si:ch211-233a24.2	Danio rerio si:ch211-233a24.2 (si:ch211-233a24.2), mRNA [NM_001145584]		NM_001145584	Dr.104798	564367	ENSDART00000090000	si:ch211-233a24.2	TC420827	5.20616	62.297	2.87551	5.28099
A_15_P431605	-2.60739	-1.38261	2.60739	down	NM_001145591	chr13:32868734-32868675	bend3	Danio rerio BEN domain containing 3 (bend3), mRNA [NM_001145591]		NM_001145591	Dr.87509	565716	ENSDART00000112292	BEN domain containing 3	TC398597	13.5545	78.7482	4.23118	5.61379
A_15_P696606	-2.61624	-1.38749	2.61624	down	CK017719	chr15:28112652-28112711		AGENCOURT_16542104 NIH_ZGC_10 Danio rerio cDNA clone IMAGE:7045545 5', mRNA sequence [CK017719]			Dr.75333				TC430512	678.417	3265.7	9.63488	11.0224
A_15_P715251	-2.09395	-1.06623	2.09395	down	NM_001002869	chr6:57423019-57422963	ddx27	Danio rerio DEAD (Asp-Glu-Ala-Asp) box polypeptide 27 (ddx27), mRNA [NM_001002869]	GO:0008026|GO:0016787|GO:0000166|GO:0004386|GO:0003676|GO:0005524	NM_001002869	Dr.76523	378844	ENSDART00000128065	DEAD (Asp-Glu-Ala-Asp) box polypeptide 27	TC367797	2076.73	6900.69	11.0728	12.1391
A_15_P417035	-4.01238	-2.00446	4.01238	down	NM_130932	chr5:38436277-38436218	ckma	Danio rerio creatine kinase, muscle a (ckma), mRNA [NM_130932]	GO:0016310|GO:0000166|GO:0016301|GO:0003824|GO:0005524|GO:0016740|GO:0016772	NM_130932	Dr.75117	30095	ENSDART00000032481	creatine kinase, muscle a	TC413644	5176.58	29641.9	12.2936	14.2981
A_15_P446560	-2.1662	-1.11517	2.1662	down	NM_131517	chr25:16051787-16051846	spon1b	Danio rerio spondin 1b (spon1b), mRNA [NM_131517]	GO:0005576	NM_131517	Dr.565	58029	ENSDART00000031828	spondin 1b	TC404866	42.8736	217.61	5.90873	7.02389
A_15_P415400	-2.63462	-1.3976	2.63462	down	NM_001098489	chr8:10088217-10088158	plxna3	Danio rerio plexin A3 (plxna3), mRNA [NM_001098489]	GO:0005622|GO:0007165|GO:0048696|GO:0008045|GO:0016020|GO:0005886|GO:0060272|GO:0048755|GO:0048675|GO:0007275|GO:0004872|GO:0016021	NM_001098489	Dr.80739	567422	ENSDART00000044000	plexin A3	TC444417	13.5069	79.3805	4.22621	5.62381
A_15_P750936	-3.82478	-1.93538	3.82478	down	AL916113	chr11:44616000-44614763	tmem63bb	transmembrane protein 63Bb [Source:ZFIN;Acc:ZDB-GENE-030131-7663] [ENSDART00000111994]	GO:0016020	XM_005169419	Dr.156128	569678	ENSDART00000111994	transmembrane protein 63Bb	TC418261	5	32.5374	2.40516	4.34054
A_15_P509167	-2.93202	-1.5519	2.93202	down	NM_001277446	chr12:11456966-11456779	si:ch211-250b22.7	Danio rerio si:ch211-250b22.7 (si:ch211-250b22.7), mRNA [NM_001277446]		NM_001277446	Dr.104399	564521	ENSDART00000126369	si:ch211-250b22.7	TC423171	26.0007	177.299	5.19113	6.74303
A_15_P106248	-2.10193	-1.07172	2.10193	down	NM_001077277	chr16:24089301-24089242	setdb1b	Danio rerio SET domain, bifurcated 1b (setdb1b), mRNA [NM_001077277]	GO:0006355|GO:0005694|GO:0008168|GO:0034968|GO:0008270|GO:0005634|GO:0032259|GO:0003677|GO:0016740|GO:0006351|GO:0018024|GO:0016568	NM_001077277	Dr.106645	768131	ENSDART00000088363	SET domain, bifurcated 1b	TC381947	367.959	1587.72	8.83645	9.90817
A_15_P109304	-2.42257	-1.27654	2.42257	down	NM_199588	chr19:6044798-6045000	eif1b	Danio rerio eukaryotic translation initiation factor 1B (eif1b), mRNA [NM_199588]	GO:0003743|GO:0006412|GO:0006413	NM_199588	Dr.162048	322237	ENSDART00000151582	eukaryotic translation initiation factor 1B	TC447763	7414.89	25464	12.7922	14.0687
A_15_P133341	-4.15927	-2.05633	4.15927	down	NM_199214	chr3:23524930-23525131	col1a1a	Danio rerio collagen, type I, alpha 1a (col1a1a), mRNA [NM_199214]	GO:0005737|GO:0005581|GO:0030278|GO:0031101|GO:0033339|GO:0033333|GO:0033334|GO:0005201	NM_199214	Dr.20097	337158	ENSDART00000047010	collagen, type I, alpha 1a	TC443283	204.804	1841.61	8.07134	10.1277
A_15_P748881	-3.51191	-1.81226	3.51191	down	NM_001076652	chr22:39563848-39563789	ncl	Danio rerio nucleolin (ncl), mRNA [NM_001076652]	GO:0000166|GO:0003676	NM_001076652	Dr.75207	767714	ENSDART00000147402	nucleolin	TC433001	3782.86	19727.3	11.8709	13.6831
A_15_P346710	-2.67127	-1.41753	2.67127	down	NM_212772	chr8:29200404-29200345	tuba8l	Danio rerio tubulin, alpha 8 like (tuba8l), mRNA [NM_212772]	GO:0006184|GO:0043234|GO:0051258|GO:0005737|GO:0000166|GO:0005874|GO:0005200|GO:0003924|GO:0007017|GO:0005856|GO:0005525	NM_212772	Dr.75912	337223	ENSDART00000062671	tubulin, alpha 8 like	TC401365	5708.69	21886.8	12.4304	13.8479
A_15_P409300	-2.30516	-1.20487	2.30516	down		chr4:32708095-32708036		GB							NP13318240	17.4902	91.2375	4.60842	5.81329
A_15_P664581	-5.03563	-2.33217	5.03563	down	NM_001114681	chr19:12563342-12561763	cpsf1	Danio rerio cleavage and polyadenylation specific factor 1 (cpsf1), mRNA [NM_001114681]	GO:0006378|GO:0060216|GO:0005634|GO:0003676	NM_001114681	Dr.5022	432372	ENSDART00000045987	cleavage and polyadenylation specific factor 1	TC376328	32.1954	383.692	5.49016	7.82233
A_15_P401130	-7.46312	-2.89978	7.46312	down	NM_001080602	chr12:44282161-44282102	ebf3	Danio rerio early B-cell factor 3 (ebf3), mRNA [NM_001080602]	GO:0006355|GO:0046983|GO:0007275|GO:0005634|GO:0003677|GO:0046872|GO:0006351	NM_001080602	Dr.86727	567751	ENSDART00000085381	early B-cell factor 3	TC367266	5	63.3955	2.40516	5.30494
A_15_P116728	-2.40667	-1.26704	2.40667	down	NM_001278600	chr11:3208686-3208745	timeless	Danio rerio timeless homolog (Drosophila) (timeless), mRNA [NM_001278600]	GO:0008150|GO:0003682|GO:0005634|GO:0042803	NM_001278600	Dr.104586	325855	ENSDART00000112417	timeless homolog (Drosophila)	TC381528	63.119	355.199	6.45088	7.71792
A_15_P430605	-2.40707	-1.26728	2.40707	down	EB895120	chr22:12204755-12204696	tmem163b	transmembrane protein 163b [Source:ZFIN;Acc:ZDB-GENE-091204-410] [ENSDART00000146785]	GO:0008324|GO:0016021|GO:0055085|GO:0006812	XM_005174011	Dr.130181	100333673	ENSDART00000146785	transmembrane protein 163b	TC401784	8.22402	44.4715	3.52316	4.79044
A_15_P170071	-3.16773	-1.66345	3.16773	down	NM_001044786	chr22:32301219-32286662	shoc2	Danio rerio soc-2 suppressor of clear homolog (C. elegans) (shoc2), mRNA [NM_001044786]	GO:0005737|GO:0019903|GO:0000164|GO:0046579|GO:0005634	NM_001044786	Dr.68831	555476	ENSDART00000059882	soc-2 suppressor of clear homolog (C. elegans)	TC391401	84.799	622.863	6.86686	8.53031
A_15_P734351	-5.79365	-2.53447	5.79365	down	XM_679369	chr16:44531916-44531857	si:dkey-199f5.8	si:dkey-199f5.8 [Source:ZFIN;Acc:ZDB-GENE-030131-4733] [ENSDART00000147210]	GO:0016757|GO:0005975	XM_679369		556544	ENSDART00000147210	si:dkey-199f5.8	TC412919	20.746	283.249	4.85833	7.3928
A_15_P721601	-2.01624	-1.01167	2.01624	down	BC095870	chr9:42794420-42799204		CTD (carboxy-terminal domain, RNA polymerase II, polypeptide A) small phosphatase 1 [Source:ZFIN;Acc:ZDB-GENE-050522-523] [ENSDART00000100226]		XM_005167903	Dr.5370		ENSDART00000100226		TC412973	107.776	499.824	7.19483	8.2065
A_15_P300041	-8.21086	-3.03753	8.21086	down		chr10:26748458-26748517		Rep: Sox14 protein - Mus musculus (Mouse), partial (11%) [TC393043]							TC440816	162.131	2818.76	7.75612	10.7937
A_15_P543327	-2.45767	-1.29729	2.45767	down	NM_001004597	chr9:38419699-38423819	dirc2	Danio rerio disrupted in renal carcinoma 2 (dirc2), mRNA [NM_001004597]	GO:0003674|GO:0016021|GO:0055085	NM_001004597	Dr.76508	447858	ENSDART00000016370	disrupted in renal carcinoma 2	TC403010	38.5818	222.435	5.75706	7.05436
A_15_P756833	-2.56305	-1.35786	2.56305	down	NM_213168	chr23:3766758-3766699	hmga1a	Danio rerio high mobility group AT-hook 1a (hmga1a), mRNA [NM_213168]	GO:0006355|GO:0005634|GO:0003677|GO:0000785	NM_213168	Dr.75367	406447	ENSDART00000137707	high mobility group AT-hook 1a	TC391075	33201.1	108678	15.0016	16.3595
A_15_P536902	-2.08676	-1.06126	2.08676	down	NM_001037386	chr2:16524459-16527506	ppp1r7	Danio rerio protein phosphatase 1, regulatory (inhibitor) subunit 7 (ppp1r7), mRNA [NM_001037386]	GO:0008150|GO:0005634	NM_001037386	Dr.76971	560323	ENSDART00000022356	protein phosphatase 1, regulatory (inhibitor) subunit 7	TC449883	767.109	2922.96	9.79329	10.8546
A_15_P753696	-2.62582	-1.39277	2.62582	down	NM_213478	chr5:21220973-21220914	kctd10	Danio rerio potassium channel tetramerisation domain containing 10 (kctd10), mRNA [NM_213478]	GO:0006810|GO:0051260|GO:0006811	NM_213478	Dr.76853	406787	ENSDART00000136259	potassium channel tetramerisation domain containing 10	TC430595	27.8494	168.916	5.28769	6.68046
A_15_P754521	-2.1277	-1.08929	2.1277	down	NM_001002037	chr22:22620815-22620756	hdgfrp2	Danio rerio hepatoma-derived growth factor, related protein 2 (hdgfrp2), mRNA [NM_001002037]		NM_001002037	Dr.159427	80965	ENSDART00000020937	hepatoma-derived growth factor, related protein 2	TC449954	216.196	1004.54	8.1412	9.23049
A_15_P729366	-2.22228	-1.15204	2.22228	down	NM_200976	chr15:27600299-27600157	prpf8	Danio rerio pre-mRNA processing factor 8 (prpf8), mRNA [NM_200976]	GO:0000244|GO:0030623|GO:0000398|GO:0003723|GO:0017070	NM_200976	Dr.45839	393951	ENSDART00000026434	pre-mRNA processing factor 8	TC380359	3283.7	11198.8	11.6873	12.8393
A_15_P721926	-2.24194	-1.16475	2.24194	down	NM_213168	chr23:3765219-3765184	hmga1a	Danio rerio high mobility group AT-hook 1a (hmga1a), mRNA [NM_213168]	GO:0006355|GO:0005634|GO:0003677|GO:0000785	NM_213168	Dr.75367	406447	ENSDART00000137707	high mobility group AT-hook 1a	TC391075	32263.4	98284.8	14.9749	16.1397
A_15_P434515	-2.97317	-1.572	2.97317	down	XM_003199533	chr11:45779187-45779128		Rep: Chromosome 17 SCAF15006, whole genome shotgun sequence - Tetraodon nigroviridis (Green puffer), partial (19%) [TC380947]		XM_003199533					TC380947	33.7816	235.107	5.55872	7.13072
A_15_P104871	-2.09198	-1.06487	2.09198	down	NM_212825	chr9:22436989-22437043	cx30.3	Danio rerio connexin 30.3 (cx30.3), mRNA [NM_212825]	GO:0005243|GO:0030054|GO:0007154|GO:0016020|GO:0005886|GO:0005921|GO:0005922|GO:0016021	NM_212825	Dr.88554	404725	ENSDART00000125357	connexin 30.3	NP589743	366.558	1574.96	8.83231	9.89718
A_15_P381115	-2.9568	-1.56404	2.9568	down	NM_001130784	chr7:25178664-25178721	wu:fk11d03	Danio rerio wu:fk11d03 (wu:fk11d03), mRNA [NM_001130784]	GO:0043565|GO:0006355|GO:0003700|GO:0005634|GO:0003677	NM_001130784	Dr.77088	566226	ENSDART00000033755	wu:fk11d03	TC383204	157.015	1037.25	7.71187	9.27591
A_15_P415610	-2.05858	-1.04165	2.05858	down	NM_199657	chr20:34049905-34049846	scyl3	Danio rerio SCY1-like 3 (S. cerevisiae) (scyl3), mRNA [NM_199657]	GO:0004672|GO:0006468|GO:0005524|GO:0016772	NM_199657	Dr.77928	323839	ENSDART00000153408	SCY1-like 3 (S. cerevisiae)	TC410915	35.6787	168.671	5.63719	6.67884
A_15_P162936	-2.72373	-1.44559	2.72373	down	NM_200119	chr12:10114582-10114523	erbb2	Danio rerio v-erb-b2 erythroblastic leukemia viral oncogene homolog 2, neuro/glioblastoma derived oncogene homolog (erbb2), mRNA [NM_200119]	GO:0031101|GO:0001755|GO:0001837|GO:0014037|GO:0007413|GO:0032285|GO:0060973|GO:0000166|GO:0016301|GO:0016772|GO:0042552|GO:0014044|GO:0005524|GO:0060347|GO:0016310|GO:0048919|GO:0004672|GO:0016020|GO:0006468|GO:0004713|GO:0016021|GO:0004714|GO:0007169|GO:0004716|GO:0016740|GO:0048914|GO:0048932	NM_200119	Dr.52559	386966	ENSDART00000003932	v-erb-b2 erythroblastic leukemia viral oncogene homolog 2, neuro/glioblastoma derived oncogene homolog	TC365924	44.874	289.35	5.9748	7.42039
A_15_P104997	-2.70682	-1.4366	2.70682	down	NM_001005395	chr3:19933271-19933212	ubtf	Danio rerio upstream binding transcription factor, RNA polymerase I (ubtf), mRNA [NM_001005395]		NM_001005395	Dr.81029	368509	ENSDART00000056614	upstream binding transcription factor, RNA polymerase I	TC384892	150.385	912.694	7.65285	9.08945
A_15_P145731	-2.51268	-1.32923	2.51268	down	XM_001923406	chr5:23726061-23726002	LOC559868	Cdc42 guanine nucleotide exchange factor (GEF) 9a [Source:ZFIN;Acc:ZDB-GENE-070705-271] [ENSDART00000088408]		XM_005165206	Dr.65523	559868	ENSDART00000088408	rho guanine nucleotide exchange factor 9-like	TC393073	10.2204	57.4134	3.83765	5.16687
A_15_P518527	-8.81414	-3.13982	8.81414	down	CK692410	chr21:32515631-32515690		clathrin interactor 1 [Source:HGNC Symbol;Acc:23186] [ENSDART00000125658]		XM_003200889	Dr.79142		ENSDART00000125658		TC402708	10.8703	224.041	3.92527	7.06509
A_15_P134326	-2.70711	-1.43675	2.70711	down	NM_001005392	chr17:26722974-26722915	rcan3	Danio rerio regulator of calcineurin family member 3 (rcan3), mRNA [NM_001005392]	GO:0019722|GO:0000166	NM_001005392	Dr.79356	325356	ENSDART00000050202	regulator of calcineurin family member 3	TC366541	22.7256	141.244	4.98918	6.42593
A_15_P473155	-2.30998	-1.20788	2.30998	down	XM_001922150	chr11:26629481-26632307	wu:fc54b10	MON1 homolog B (yeast) [Source:HGNC Symbol;Acc:25020] [ENSDART00000110224]		XM_001922150	Dr.106616	325065	ENSDART00000110224	wu:fc54b10	TC404630	54.2877	293.541	6.23425	7.44212
A_15_P290206	-2.6699	-1.41679	2.6699	down	EH452889	chr24:8139658-8139599	eef1e1	FDR103-P00059-DEPE-F_I23 FDR103 Danio rerio cDNA clone FDR103-P00059-BR_I23 5', mRNA sequence [EH452889]			Dr.78801	565440		eukaryotic translation elongation factor 1 epsilon 1	TC378308	351.62	1923.5	8.7756	10.1924
A_15_P188426	-2.19903	-1.13686	2.19903	down	NM_001145557	chr1:51524670-51524819	ugp2a	Danio rerio UDP-glucose pyrophosphorylase 2a (ugp2a), mRNA [NM_001145557]	GO:0008152|GO:0016779	NM_001145557	Dr.69703	555748	ENSDART00000010449	UDP-glucose pyrophosphorylase 2a	TC410961	12.4373	60.8881	4.1128	5.24967
A_15_P685231	-2.83143	-1.50153	2.83143	down	XM_002663863	chr12:977682-977741		ATP-binding cassette, sub-family C (CFTR/MRP), member 3 [Source:HGNC Symbol;Acc:54] [ENSDART00000114196]		XM_002663863			ENSDART00000114196		TC427813	42.3481	283.467	5.89281	7.39434
A_15_P204226	-3.05882	-1.61298	3.05882	down	XM_682380	chr16:29349041-29349100	galnt1	UDP-N-acetyl-alpha-D-galactosamine:polypeptide N-acetylgalactosaminyltransferase 1 [Source:ZFIN;Acc:ZDB-GENE-030131-2360] [ENSDART00000140673]	GO:0005794|GO:0016020|GO:0016757|GO:0006486|GO:0016021|GO:0016740	XM_682380		559073	ENSDART00000140673	UDP-N-acetyl-alpha-D-galactosamine:polypeptide N-acetylgalactosaminyltransferase 1	NP9852666	66.1953	473.925	6.51982	8.13279
A_15_P269286	-6.98649	-2.80457	6.98649	down	NM_001166330	chr6:9400343-9400402	ptger1a	Danio rerio prostaglandin E receptor 1a (subtype EP1) (ptger1a), mRNA [NM_001166330]	GO:0007165|GO:0016020|GO:0007186|GO:0004960|GO:0004930|GO:0016021|GO:0004871|GO:0004957	NM_001166330	Dr.157832	559315	ENSDART00000151355	prostaglandin E receptor 1a (subtype EP1)	TC389687	5	59.1095	2.40516	5.20973
A_15_P518752	-3.17103	-1.66495	3.17103	down	AI883692	chr16:58598000-58598059	LOC792958	Uncharacterized protein [Source:UniProtKB/TrEMBL;Acc:E7FGS2] [ENSDART00000109391]			Dr.155548	792958	ENSDART00000109391	nuclear receptor coactivator 7-like	TC405023	24.9874	184.52	5.13308	6.79804
A_15_P741956	-3.31574	-1.72933	3.31574	down	NM_001039994	chr21:31233388-31232014	zgc:123105	Danio rerio zgc:123105 (zgc:123105), mRNA [NM_001039994]	GO:0005737|GO:0016491|GO:0055114	NM_001039994	Dr.79894	664766	ENSDART00000007675	zgc:123105	TC425298	43.2495	339.233	5.92318	7.65251
A_15_P659806	-2.36721	-1.24318	2.36721	down	NM_001025452	chr9:23971235-23971294	tsn	Danio rerio translin (tsn), mRNA [NM_001025452]	GO:0043565	NM_001025452	Dr.33507	334107	ENSDART00000061299	translin	TC432949	250.435	1270.02	8.33971	9.58289
A_15_P169261	-4.44909	-2.15351	4.44909	down	NM_131550	chr7:60949326-60949267	pc	Danio rerio pyruvate carboxylase (pc), mRNA [NM_131550]	GO:0000166|GO:0016874|GO:0008152|GO:0006094|GO:0004736|GO:0004075|GO:0003824|GO:0005524|GO:0003677|GO:0046872|GO:0046686	NM_131550	Dr.5998	58068	ENSDART00000073654	pyruvate carboxylase	TC410747	66.9173	691.617	6.53423	8.68774
A_15_P112907	-2.57867	-1.36663	2.57867	down	NM_001256251	chr14:9486696-9486756	msnb	Danio rerio moesin b (msnb), mRNA [NM_001256251]	GO:0008092|GO:0005737|GO:0003779|GO:0005856|GO:0019898	NM_001256251	Dr.91969	553434	ENSDART00000042831	moesin b	TC376683	5	22.2992	2.40516	3.77179
A_15_P736096	-3.36871	-1.7522	3.36871	down	NM_001031676	chr16:58357417-58360126	pabpc1a	Danio rerio poly A binding protein, cytoplasmic 1 a (pabpc1a), mRNA [NM_001031676]	GO:0007507|GO:0000166|GO:0003723|GO:0003676	NM_001031676	Dr.24504	606498	ENSDART00000148392	poly A binding protein, cytoplasmic 1 a	TC408025	5782.48	27805.8	12.4477	14.1999
A_15_P659276	-11.7873	-3.55916	11.7873	down	NM_130971	chr3:41918208-41918267	lfng	Danio rerio lunatic fringe homolog (lfng), mRNA [NM_130971]	GO:0007389|GO:0033829|GO:0005794|GO:0016757|GO:0007275|GO:0046872|GO:0030154|GO:0007399|GO:0030173|GO:0007219|GO:0016020|GO:0045665|GO:0055016|GO:0016021|GO:0016740	NM_130971	Dr.1831	30158	ENSDART00000028673	lunatic fringe homolog	NP13229100	65.1598	1749.53	6.49586	10.055
A_15_P446740	-3.20375	-1.67976	3.20375	down	NM_001082805	chr22:3960780-3960939	kdm4b	Danio rerio lysine (K)-specific demethylase 4B (kdm4b), mRNA [NM_001082805]	GO:0008270|GO:0005634|GO:0046872	NM_001082805	Dr.81759	556504	ENSDART00000034084	lysine (K)-specific demethylase 4B	TC366382	21.8002	161.044	4.93064	6.6104
A_15_P504807	-3.20019	-1.67816	3.20019	down	NM_001115141	chr7:73855270-73854935	dhx15	Danio rerio DEAH (Asp-Glu-Ala-His) box polypeptide 15 (dhx15), mRNA [NM_001115141]	GO:0008026|GO:0016787|GO:0000166|GO:0004386|GO:0003676|GO:0005524	NM_001115141	Dr.4024	321931	ENSDART00000081245	DEAH (Asp-Glu-Ala-His) box polypeptide 15	TC400180	802.215	4550.48	9.84377	11.5219
A_15_P626886	-3.14341	-1.65233	3.14341	down	NM_001244879	chr18:2670879-2674774	fam168a	Danio rerio family with sequence similarity 168, member A (fam168a), transcript variant 1, mRNA [NM_001244879]	GO:0008150|GO:0003674|GO:0005575	NM_001244879	Dr.76527	751761	ENSDART00000092997	family with sequence similarity 168, member A	TC380388	606.196	3546.38	9.49186	11.1442
A_15_P198861	-4.01212	-2.00437	4.01212	down	NM_200120	chr2:31164745-31164804	stam	Danio rerio signal transducing adaptor molecule (SH3 domain and ITAM motif) 1 (stam), mRNA [NM_200120]	GO:0006886	NM_200120	Dr.113919	386967	ENSDART00000026966	signal transducing adaptor molecule (SH3 domain and ITAM motif) 1	NP13225909	91.1397	838.874	6.96153	8.9659
A_15_P254958	-2.26263	-1.178	2.26263	down	XR_223011	chr23:31263433-31263492		PREDICTED: Danio rerio si:ch211-197l9.4 (si:ch211-197l9.4), misc_RNA [XR_223011]		XR_223011					TC421895	298.602	1423.26	8.57058	9.74858
A_15_P221206	-3.15477	-1.65754	3.15477	down	NM_200646	chr14:49084169-49087678	naa15a	Danio rerio N(alpha)-acetyltransferase 15, NatA auxiliary subunit a (naa15a), mRNA [NM_200646]		NM_200646	Dr.78308	323672	ENSDART00000017785	N(alpha)-acetyltransferase 15, NatA auxiliary subunit a	TC378833	446.488	2744.89	9.09587	10.7534
A_15_P496122	-2.41268	-1.27063	2.41268	down	NM_130922	chr22:755885-755826	btg2	Danio rerio B-cell translocation gene 2 (btg2), mRNA [NM_130922]		NM_130922	Dr.76624	30079	ENSDART00000019155	B-cell translocation gene 2	TC389583	2398.44	9014.36	11.2614	12.532
A_15_P630261	-2.44267	-1.28846	2.44267	down	NM_001007776	chr5:1309999-1304404	fubp3	Danio rerio far upstream element (FUSE) binding protein 3 (fubp3), mRNA [NM_001007776]	GO:0008150|GO:0003723|GO:0005575	NM_001007776	Dr.76973	493616	ENSDART00000026923	far upstream element (FUSE) binding protein 3	TC369711	396.28	1958.03	8.93568	10.2241
A_15_P651126	-2.35353	-1.23483	2.35353	down	NM_001017706	chr4:8266079-8265731	hcfc2	Danio rerio host cell factor C2 (hcfc2), mRNA [NM_001017706]	GO:0008150|GO:0003674	NM_001017706	Dr.22869	550401	ENSDART00000080943	host cell factor C2		62.4825	343.702	6.43883	7.67366
A_15_P666896	-2.08721	-1.06158	2.08721	down	NM_001128681	chr13:25436304-25436245	vcla	Danio rerio vinculin (vcl), mRNA [NM_001128681]	GO:0060047|GO:0005198|GO:0045214|GO:0015629|GO:0007155	NM_001128681	Dr.78221	552980	ENSDART00000039828	vinculin a	TC366253	201.43	925.736	8.04822	9.1098
A_15_P485835	-5.64059	-2.49585	5.64059	down	NM_001045300	chr1:55628020-55628079	lgalsla	Danio rerio lectin, galactoside-binding-like a (lgalsla), mRNA [NM_001045300]	GO:0008150|GO:0030246|GO:0005575	NM_001045300	Dr.88991	723995	ENSDART00000077390	lectin, galactoside-binding-like a	TC366319	5.64586	71.3745	2.98432	5.48017
A_15_P396455	-2.7308	-1.44932	2.7308	down	NM_001077725	chr25:5208375-5208434	athl1	Danio rerio ATH1, acid trehalase-like 1 (yeast) (athl1), mRNA [NM_001077725]	GO:0016787|GO:0005975|GO:0016798|GO:0008152|GO:0005575|GO:0003824	NM_001077725	Dr.84017	777617	ENSDART00000021120	ATH1, acid trehalase-like 1 (yeast)	TC368436	13.798	84.3217	4.2547	5.70402
A_15_P168686	-2.52596	-1.33683	2.52596	down	EE692215	chr18:43169935-43169994		si:dkey-224e22.2 [Source:ZFIN;Acc:ZDB-GENE-061207-59] [ENSDART00000132775]		XM_001339390	Dr.81747		ENSDART00000132775		TC398000	5.01711	28.7121	2.82023	4.15706
A_15_P175686	-2.56819	-1.36075	2.56819	down	NM_001040035	chr18:18438025-18437966	aars	Danio rerio alanyl-tRNA synthetase (aars), transcript variant 2, mRNA [NM_001040035]	GO:0005737|GO:0000166|GO:0006419|GO:0004813|GO:0003676|GO:0043039|GO:0005524|GO:0016876	NM_001040035	Dr.75848	324940	ENSDART00000076695	alanyl-tRNA synthetase	NP13324960	303.873	1634.98	8.593	9.95375
A_15_P288706	-2.28999	-1.19534	2.28999	down	NM_200182	chr5:26182391-26182332	tia1l	Danio rerio cytotoxic granule-associated RNA binding protein 1, like (tia1l), mRNA [NM_200182]	GO:0000166|GO:0003676	NM_200182	Dr.5585	323447	ENSDART00000003957	cytotoxic granule-associated RNA binding protein 1, like	TC413229	921.132	3711.33	10.0209	11.2162
A_15_P412895	-2.45971	-1.29849	2.45971	down	NM_200275	chr16:56482815-56482756	brd9	Danio rerio bromodomain containing 9 (brd9), mRNA [NM_200275]	GO:0006355|GO:0070577|GO:0006351|GO:0016568	NM_200275	Dr.77449	393245	ENSDART00000009256	bromodomain containing 9	TC368944	60.9881	349.271	6.39881	7.6973
A_15_P762231	-2.39496	-1.26	2.39496	down	XM_005162887	chr24:39502482-39502423		chromosome 16 open reading frame 11 [Source:HGNC Symbol;Acc:14139] [ENSDART00000151970]		XM_005162887			ENSDART00000151970		NP13315292	6425.7	21978.6	12.5941	13.8541
A_15_P728826	-4.45089	-2.15409	4.45089	down	NM_001077583	chr24:28109587-28109528	zmynd11	Danio rerio zinc finger, MYND domain containing 11 (zmynd11), transcript variant 2, mRNA [NM_001077583]	GO:0030514|GO:0008270|GO:0046872	NM_001077583	Dr.77694	553781	ENSDART00000134380	zinc finger, MYND domain containing 11	TC422139	46.0064	482.326	6.00541	8.15951
A_15_P407480	-3.01672	-1.59298	3.01672	down	XM_687077	chr2:19180501-19180442	cc2d1b	coiled-coil and C2 domain containing 1B [Source:ZFIN;Acc:ZDB-GENE-030131-1426] [ENSDART00000109504]		XM_687077		563720	ENSDART00000109504	coiled-coil and C2 domain containing 1B	TC368623	110.445	758.181	7.22719	8.82017
A_15_P491102	-5.14251	-2.36247	5.14251	down	NM_001128254	chr8:50103798-50103857	mfn2	Danio rerio mitofusin 2 (mfn2), nuclear gene encoding mitochondrial protein, mRNA [NM_001128254]	GO:0006184|GO:0005739|GO:0005622|GO:0008053|GO:0007528|GO:0003924|GO:0019896|GO:0048662|GO:0005741|GO:0016021|GO:0007409|GO:0005525	NM_001128254	Dr.116285	567448	ENSDART00000108662	mitofusin 2	TC369000	7.44238	85.859	3.36596	5.72843
A_15_P418880	-3.3268	-1.73414	3.3268	down	NM_001030076	chr23:24791700-24791759	szrd1	Danio rerio SUZ RNA binding domain containing 1 (szrd1), mRNA [NM_001030076]	GO:0008150|GO:0003674|GO:0005575	NM_001030076	Dr.75483	554231	ENSDART00000136948	SUZ RNA binding domain containing 1	TC373966	231.452	1649.54	8.23268	9.96682
A_15_P376690	-2.18331	-1.12652	2.18331	down	NM_001144040	chr9:55937620-55937561	cog3	Danio rerio component of oligomeric golgi complex 3 (cog3), mRNA [NM_001144040]	GO:0005801|GO:0016020|GO:0006886	NM_001144040	Dr.82136	553061	ENSDART00000122511	component of oligomeric golgi complex 3	TC395394	24.3489	121.37	5.09349	6.22001
A_15_P420685	-2.08071	-1.05707	2.08071	down	NM_198978	chr22:32371234-32371092	pdcd4b	Danio rerio programmed cell death 4b (pdcd4b), mRNA [NM_198978]		NM_198978	Dr.77195	321061	ENSDART00000009223	programmed cell death 4b	TC451085	181.737	840.748	7.91347	8.97055
A_15_P485830	-2.57939	-1.36703	2.57939	down	NM_199219	chr1:12848562-12848503	elf2b	Danio rerio E74-like factor 2b (ets domain transcription factor) (elf2b), mRNA [NM_199219]	GO:0043565|GO:0006355|GO:0003700|GO:0005634|GO:0003677	NM_199219	Dr.2328	387534	ENSDART00000011414	E74-like factor 2b (ets domain transcription factor)	TC431612	78.1469	470.269	6.75455	8.12158
A_15_P643241	-5.46347	-2.44982	5.46347	down	NM_001145594	chr13:39777393-39777452	LOC566435	Danio rerio novel protein similar to H.sapiens FAM135A, family with sequence similarity 135, member A (FAM135A) (LOC566435), mRNA [NM_001145594]		NM_001145594	Dr.132867	566435	ENSDART00000083641	novel protein similar to H.sapiens FAM135A, family with sequence similarity 135, member A (FAM135A)	TC414233	9.19139	113.977	3.68076	6.13058
A_15_P228257	-2.89383	-1.53298	2.89383	down	NM_001281788	chr20:26439817-26439758	akap12b	Danio rerio A kinase (PRKA) anchor protein (gravin) 12b (akap12b), transcript variant 1, mRNA [NM_001281788]	GO:0060028|GO:0007165|GO:0000902|GO:0048471|GO:0005737|GO:0035024|GO:0032060|GO:0009887|GO:0006605	NM_001281788	Dr.104704	567365	ENSDART00000110883	A kinase (PRKA) anchor protein (gravin) 12b	TC381253	5126.09	21371.1	12.2788	13.8118
A_15_P687771	-4.75867	-2.25056	4.75867	down	NM_212791	chr13:25143401-25143342	adka	Danio rerio adenosine kinase a (adka), transcript variant 1, mRNA [NM_212791]	GO:0016310|GO:0006166|GO:0016301|GO:0004001|GO:0016773|GO:0016740	NM_212791	Dr.76313	368220	ENSDART00000057605	adenosine kinase a	TC442674	4400.78	30241.6	12.0724	14.323
A_15_P605672	-2.35751	-1.23726	2.35751	down	NM_001076727	chr13:27536696-27536755	slc17a5	Danio rerio solute carrier family 17 (anion/sugar transporter), member 5 (slc17a5), mRNA [NM_001076727]	GO:0016021|GO:0055085	NM_001076727	Dr.85160	767760	ENSDART00000101468	solute carrier family 17 (anion/sugar transporter), member 5	NP13225680	140.279	745.776	7.558	8.79527
A_15_P660151	-3.4913	-1.80376	3.4913	down	BC165906	chr10:2876212-2877353	ykt6	Danio rerio zgc:55536, mRNA (cDNA clone MGC:192994 IMAGE:100061489), complete cds. [BC165906]	GO:0005737|GO:0005794|GO:0016020|GO:0000139|GO:0006810|GO:0031410|GO:0016021|GO:0016192|GO:0015031|GO:0030659|GO:0016740|GO:0005829		Dr.80710	394067		YKT6 v-SNARE homolog (S. cerevisiae)	NP13225238	16.4287	130.147	4.51275	6.31651
A_15_P744986	-2.14866	-1.10344	2.14866	down	NM_213301	chr5:72482728-72482669	aldh2.2	Danio rerio aldehyde dehydrogenase 2, tandem duplicate 2 (aldh2.2), mRNA [NM_213301]	GO:0016620|GO:0008152|GO:0016491|GO:2001038|GO:0055114	NM_213301	Dr.76704	368239	ENSDART00000097249	aldehyde dehydrogenase 2, tandem duplicate 2	TC428093	1034.79	3867.59	10.1726	11.276
A_15_P346540	-2.08656	-1.06113	2.08656	down	NM_200393	chr1:566920-566979	ildr1a	Danio rerio immunoglobulin-like domain containing receptor 1a (ildr1a), mRNA [NM_200393]	GO:0003674	NM_200393	Dr.82397	393364	ENSDART00000152465	immunoglobulin-like domain containing receptor 1a	TC428980	17.2921	81.1177	4.58957	5.6507
A_15_P756211	-2.20536	-1.14102	2.20536	down	NM_199548	chr10:3435007-3434948	tmed2	Danio rerio transmembrane emp24 domain trafficking protein 2 (tmed2), mRNA [NM_199548]	GO:0016020|GO:0006810|GO:0016021	NM_199548	Dr.75683	321550	ENSDART00000037183	transmembrane emp24 domain trafficking protein 2	TC453318	1906.86	6762.47	10.9643	12.1054
A_15_P106319	-3.28103	-1.71415	3.28103	down	NM_201326	chr14:12409470-12409615	hspa9	Danio rerio heat shock protein 9 (hspa9), mRNA [NM_201326]	GO:0030097|GO:0031101|GO:0000166|GO:0006457|GO:0005759|GO:0006950|GO:0051082|GO:0016887|GO:0005524	NM_201326	Dr.76128	373085	ENSDART00000012438	heat shock protein 9	TC429819	639.696	3851.97	9.55746	11.2716
A_15_P110726	-2.16428	-1.11389	2.16428	down	NM_200839	chr16:41291611-41291552	eif3ea	Danio rerio eukaryotic translation initiation factor 3, subunit E, a (eif3ea), mRNA [NM_200839]	GO:0005852|GO:0016282|GO:0033290|GO:0001731|GO:0003743|GO:0005634|GO:0048703|GO:0006412|GO:0006413|GO:0005737|GO:0006446|GO:0043473|GO:0043010	NM_200839	Dr.76376	325102	ENSDART00000140684	eukaryotic translation initiation factor 3, subunit E, a	TC432716	7631.04	23336.6	12.8354	13.9493
A_15_P166716	-2.37668	-1.24895	2.37668	down	CA473321	chr12:30110047-30109988	si:dkeyp-67g8.1	si:dkeyp-67g8.1 [Source:ZFIN;Acc:ZDB-GENE-120910-1] [ENSDART00000008010]		XM_005156248	Dr.81713	794083	ENSDART00000008010	si:dkeyp-67g8.1	TC421080	22.882	124.215	5.00151	6.25045
A_15_P167231	-6.89475	-2.7855	6.89475	down	NM_001044316	chr12:21960720-21960661	snx11	Danio rerio sorting nexin 11 (snx11), mRNA [NM_001044316]	GO:0007154|GO:0005575|GO:0035091	NM_001044316	Dr.117435	492678	ENSDART00000105361	sorting nexin 11	TC365829	15.0223	241.073	4.38042	7.16592
A_15_P429585	-2.38611	-1.25466	2.38611	down	NM_001113594	Zv9_NA154:31789-31730	trim32	Danio rerio tripartite motif-containing 32 (trim32), mRNA [NM_001113594]	GO:0005622|GO:0008270|GO:0070121|GO:0046872|GO:0032402	NM_001113594	Dr.73145	562764	ENSDART00000111216	tripartite motif-containing 32	TC368559	13.2113	69.855	4.19268	5.44735
A_15_P132386	-2.60772	-1.38279	2.60772	down	NM_152972	chr10:16084431-16084490	lmnb1	Danio rerio lamin B1 (lmnb1), mRNA [NM_152972]	GO:0005882|GO:0005198	NM_152972	Dr.25051	195816	ENSDART00000065037	lamin B1	TC367038	6067.26	22716.3	12.5151	13.8979
A_15_P348130	-4.36997	-2.12762	4.36997	down	NM_001113612	chr8:50003202-50003143	si:dkeyp-104h9.5	Danio rerio si:dkeyp-104h9.5 (si:dkeyp-104h9.5), mRNA [NM_001113612]		NM_001113612	Dr.78167	568307	ENSDART00000110393	si:dkeyp-104h9.5	TC415473	25.5238	263.482	5.16058	7.2882
A_15_P213591	-2.28203	-1.19032	2.28203	down	NM_001013540	chr17:48279582-48279641	slc39a9	Danio rerio solute carrier family 39 (zinc transporter), member 9 (slc39a9), mRNA [NM_001013540]	GO:0016020|GO:0005385|GO:0046873|GO:0006810|GO:0006829|GO:0016021|GO:0055085|GO:0030001|GO:0006811	NM_001013540	Dr.76697	541413		solute carrier family 39 (zinc transporter), member 9	TC431497	81.9588	436.306	6.81685	8.00717
A_15_P145076	-12.4137	-3.63386	12.4137	down	NM_001030081	chr7:55793798-55793739	znf609	Danio rerio zinc finger protein 609 (znf609), mRNA [NM_001030081]	GO:0046872	NM_001030081	Dr.83020	555219	ENSDART00000063488	zinc finger protein 609	TC387839	15.0331	438.712	4.38155	8.01542
A_15_P628107	-2.85571	-1.51385	2.85571	down	NM_001076667	chr9:3217829-3217888	dync1i2a	Danio rerio dynein, cytoplasmic 1, intermediate chain 2a (dync1i2a), mRNA [NM_001076667]	GO:0003674|GO:0005868|GO:0007018	NM_001076667	Dr.38804	767729	ENSDART00000007756	dynein, cytoplasmic 1, intermediate chain 2a	TC390456	171.425	1086.39	7.83365	9.3475
A_15_P565482	-2.77738	-1.47372	2.77738	down	NM_201449	chr3:22263489-22263697	cdc27	Danio rerio cell division cycle 27 (cdc27), mRNA [NM_201449]	GO:0007049|GO:0005575|GO:0051301	NM_201449	Dr.40998	30450	ENSDART00000078707	cell division cycle 27	TC408972	699.068	3551.91	9.67331	11.147
A_15_P139881	-2.21557	-1.14768	2.21557	down	NM_001037370	chr15:24975388-24975447	tsr1	Danio rerio TSR1, 20S rRNA accumulation, homolog (yeast) (tsr1), mRNA [NM_001037370]	GO:0042254|GO:0005634	NM_001037370	Dr.78316	325037	ENSDART00000045603	TSR1, 20S rRNA accumulation, homolog (yeast)	TC373052	342.855	1566.37	8.74164	9.88931
A_15_P738331	-2.21404	-1.14668	2.21404	down	NM_001017790	chr18:39082705-39078431		vasodilator-stimulated phosphoprotein [Source:ZFIN;Acc:ZDB-GENE-030131-7118] [ENSDART00000098865]		XM_005173680	Dr.106500		ENSDART00000098865		TC418122	49.2654	255.251	6.0971	7.24378
A_15_P111576	-5.63732	-2.49501	5.63732	down	XM_001922770	chr1:31251982-31252041	LOC565702	cyclin M2 [Source:HGNC Symbol;Acc:103] [ENSDART00000112333]		XM_001922770		565702	ENSDART00000112333	metal transporter CNNM2-like	TC381377	24.4993	326.866	5.10288	7.59789
A_15_P741026	-7.45531	-2.89827	7.45531	down	NM_213212	chr6:1711805-1711864	myl9b	Danio rerio myosin, light chain 9b, regulatory (myl9b), mRNA [NM_213212]	GO:0005509	NM_213212	Dr.75157	406493	ENSDART00000113505	myosin, light chain 9b, regulatory	TC423589	984.646	12532.4	10.1099	13.0081
A_15_P445755	-2.06646	-1.04716	2.06646	down	NM_131243	chr1:56790722-56790870	c3b	Danio rerio complement component c3b (c3b), mRNA [NM_131243]	GO:0004866|GO:0071391|GO:0005576|GO:0005615	NM_131243	Dr.21006	30491	ENSDART00000019644	complement component c3b	TC365542	123.583	580.821	7.38198	8.42914
A_15_P134386	-2.13042	-1.09114	2.13042	down	NM_199641	chr23:9935918-9935859	prkcbp1l	Danio rerio protein kinase C binding protein 1, like (prkcbp1l), mRNA [NM_199641]	GO:0016310|GO:0016301|GO:0008270|GO:0046872|GO:0016740	NM_199641	Dr.2562	323479	ENSDART00000124510	protein kinase C binding protein 1, like	TC365850	94.3748	463.527	7.01037	8.10151
A_15_P284061	-2.47282	-1.30616	2.47282	down	NM_001002504	chr17:28751716-28751856	hectd1	Danio rerio HECT domain containing 1 (hectd1), mRNA [NM_001002504]	GO:0005737|GO:0004842|GO:0016567|GO:0042787|GO:0016874|GO:0005634|GO:0046872|GO:0016740	NM_001002504	Dr.78767	100002034	ENSDART00000076344	HECT domain containing 1	TC428942	125.778	703.402	7.40738	8.71354
A_15_P114889	-2.72344	-1.44543	2.72344	down	NM_131861	chr1:51617459-51617400	jag1a	Danio rerio jagged 1a (jag1a), mRNA [NM_131861]	GO:0007154|GO:0016020|GO:0007219|GO:0005509|GO:0005112|GO:0007275|GO:0030878|GO:0016021	NM_131861	Dr.83677	140421	ENSDART00000123632	jagged 1a	TC365915	40.6466	261.111	5.82987	7.2753
A_15_P406460	-2.87642	-1.52427	2.87642	down		chr10:2605240-2605299	LOC792822	spindlin family, member 2B [Source:HGNC Symbol;Acc:33147] [ENSDART00000081922]				792822	ENSDART00000081922	spindlin-Z-like	TC438912	76.8279	516.65	6.73172	8.256
A_15_P131436	-3.47082	-1.79528	3.47082	down	NM_131328	chr20:54347963-54347694	hsp90aa1.1	Danio rerio heat shock protein 90, alpha (cytosolic), class A member 1, tandem duplicate 1 (hsp90aa1.1), mRNA [NM_131328]	GO:0005515|GO:0030240|GO:0042470|GO:0048471|GO:0030018|GO:0006950|GO:0005524|GO:0045429|GO:0005737|GO:0007517|GO:0000166|GO:0006457|GO:0030239|GO:0071688|GO:0051082|GO:0030235|GO:0030241|GO:0048769|GO:0014866	NM_131328	Dr.75834	30591	ENSDART00000004756	heat shock protein 90, alpha (cytosolic), class A member 1, tandem duplicate 1	TC433336	3234.6	17076.2	11.6643	13.4595
A_15_P750071	-2.34288	-1.22829	2.34288	down	NM_131874	chr5:17722350-17720559	xbp1	Danio rerio X-box binding protein 1 (xbp1), mRNA [NM_131874]	GO:0048785|GO:0043565|GO:0006355|GO:0003700|GO:0035188|GO:0006366|GO:0006357|GO:0000981	NM_131874	Dr.76130	140614	ENSDART00000139390	X-box binding protein 1	TC423273	1320.33	5181.65	10.483	11.7113
A_15_P738416	-4.98266	-2.31692	4.98266	down	NM_213374	chr23:44173499-44173440	zgc:56304	Danio rerio zgc:56304 (zgc:56304), mRNA [NM_213374]	GO:0005622|GO:0000166|GO:0006810|GO:0003676	NM_213374	Dr.31694	406683	ENSDART00000040923	zgc:56304	TC397556	125.428	1394.09	7.40297	9.71989
A_15_P151446	-5.79423	-2.53462	5.79423	down	NM_001044337	chr19:29873540-29873481	fndc5b	Danio rerio fibronectin type III domain containing 5b (fndc5b), mRNA [NM_001044337]	GO:0008150|GO:0016020|GO:0005886|GO:0005179|GO:0005576|GO:0016021|GO:0005778|GO:0005777	NM_001044337	Dr.92513	555635	ENSDART00000052108	fibronectin type III domain containing 5b	TC382500	5	49.2506	2.40516	4.93978
A_15_P342175	-2.15567	-1.10814	2.15567	down	NM_001079951	chr25:17701124-17701393	cnot1	Danio rerio CCR4-NOT transcription complex, subunit 1 (cnot1), mRNA [NM_001079951]	GO:0006355|GO:0030331|GO:0060213|GO:0005634|GO:0000122|GO:0031047|GO:0042974|GO:0006351|GO:0006417|GO:0030014|GO:0005737|GO:0010606|GO:1900153|GO:0048387|GO:0000932|GO:0033147	NM_001079951	Dr.75497	448949	ENSDART00000017536	CCR4-NOT transcription complex, subunit 1	TC365559	915.303	3479.53	10.0097	11.1179
A_15_P734266	-2.17447	-1.12066	2.17447	down	NM_181601	chr3:40521940-40521796	actb2	Danio rerio actin, beta 2 (actb2), mRNA [NM_181601]	GO:0005737|GO:0000166|GO:0005856|GO:0005524	NM_181601	Dr.152450	57935	ENSDART00000148290	actin, beta 2	TC447224	79494.6	205670	16.2693	17.39
A_15_P723166	-2.43286	-1.28266	2.43286	down	NM_131587	chr9:35993303-35993362	gabpa	Danio rerio GA-binding protein transcription factor, alpha subunit (gabpa), mRNA [NM_131587]	GO:0043565|GO:0006355|GO:0003700|GO:0005634|GO:0003677	NM_131587	Dr.77675	58110	ENSDART00000132631	GA-binding protein transcription factor, alpha subunit	TC387338	595.315	2748.58	9.47319	10.7558
A_15_P312006	-3.39797	-1.76467	3.39797	down	XM_005169482	chr12:35035634-35035575	LOC568340	mbt domain containing 1 [Source:HGNC Symbol;Acc:19866] [ENSDART00000086087]		XM_005169482		568340	ENSDART00000086087	MBT domain-containing protein 1-like	TC380489	124.491	958.502	7.39391	9.15858
A_15_P106628	-3.75938	-1.9105	3.75938	down	NM_199279	chr20:34363625-34363684	ivns1abpa	Danio rerio influenza virus NS1A binding protein a (ivns1abpa), mRNA [NM_199279]	GO:0005737|GO:0005634|GO:0005856	NM_199279	Dr.78256	387591	ENSDART00000135889	influenza virus NS1A binding protein a	TC427650	161.507	1337.42	7.75021	9.66071
A_15_P147401	-2.43185	-1.28206	2.43185	down	NM_001017744	chr5:58979685-58979626	hspb2	Danio rerio heat shock protein, alpha-crystallin-related, b2 (hspb2), mRNA [NM_001017744]	GO:0003674|GO:0006950	NM_001017744	Dr.42170	550439	ENSDART00000074306	heat shock protein, alpha-crystallin-related, b2	NP13225441	10.3313	56.3136	3.85225	5.13431
A_15_P484170	-3.5779	-1.83911	3.5779	down	XM_696274	chr7:25278465-25278406		PREDICTED: Danio rerio ajuba LIM protein (ajuba), mRNA [XM_696274]	GO:0046966|GO:0016922|GO:0003779	XM_696274					TC384357	56.3824	471.209	6.28517	8.12429
A_15_P582437	-2.18352	-1.12666	2.18352	down	NM_200507	chr9:21816090-21816149	fam46c	Danio rerio family with sequence similarity 46, member C (fam46c), mRNA [NM_200507]	GO:0008150|GO:0003674|GO:0005575	NM_200507	Dr.142747	327154	ENSDART00000142787	family with sequence similarity 46, member C	TC398220	17.0675	83.9023	4.56983	5.69648
A_15_P630406	-2.98701	-1.5787	2.98701	down	NM_001020550	chr11:2440444-2440503	tp53rk	Danio rerio TP53 regulating kinase (tp53rk), mRNA [NM_001020550]	GO:0004672|GO:0016020|GO:0004674|GO:0016773|GO:0006468|GO:0004713|GO:0009103|GO:0005524|GO:0016772	NM_001020550	Dr.31620	553571		TP53 regulating kinase	NP13229207	30.1529	210.432	5.39626	6.97496
A_15_P119970	-3.61917	-1.85566	3.61917	down	NM_001002222	chr15:24814682-24814741	pak4	Danio rerio p21 protein (Cdc42/Rac)-activated kinase 4 (pak4), mRNA [NM_001002222]	GO:0016310|GO:0002573|GO:0004672|GO:0000166|GO:0016301|GO:0004674|GO:0006468|GO:0005575|GO:0048598|GO:0005524|GO:0016740|GO:0016772	NM_001002222	Dr.132625	431769	ENSDART00000009545	p21 protein (Cdc42/Rac)-activated kinase 4	TC413811	58.4445	495.35	6.34013	8.19579
A_15_P406175	-2.02623	-1.0188	2.02623	down	NM_200464	chr17:51606413-51606354	aqr	Danio rerio aquarius homolog (mouse) (aqr), mRNA [NM_200464]	GO:0000398|GO:0005681|GO:0097157	NM_200464	Dr.17308	393436	ENSDART00000130412	aquarius homolog (mouse)	TC365602	71.9544	339.786	6.63607	7.65487
A_15_P137251	-2.41756	-1.27355	2.41756	down	XM_005174299	chr25:11405535-11405476		synaptic vesicle glycoprotein 2B [Source:HGNC Symbol;Acc:16874] [ENSDART00000085816]		XM_005174299			ENSDART00000085816		TC419111	108.711	602.659	7.2068	8.48035
A_15_P439270	-2.64143	-1.40132	2.64143	down	BC154493	chr6:23802820-23802879	LOC556764	DEAD (Asp-Glu-Ala-Asp) box helicase 17 [Source:HGNC Symbol;Acc:2740] [ENSDART00000151747]		XM_001923795	Dr.75535	556764	ENSDART00000151747	probable ATP-dependent RNA helicase DDX17-like	TC418706	692.179	3358.48	9.66204	11.0634
A_15_P381620	-3.42395	-1.77566	3.42395	down	NM_001145562	chr13:13598319-13598378	si:ch211-194c3.5	Danio rerio si:ch211-194c3.5 (si:ch211-194c3.5), mRNA [NM_001145562]		NM_001145562	Dr.45523	556058	ENSDART00000110509	si:ch211-194c3.5	TC380602	5	29.2174	2.40516	4.18083
A_15_P725896	-4.97359	-2.31429	4.97359	down	NM_001083002	chr25:29856054-29855995	arid3b	Danio rerio AT rich interactive domain 3B (Bright like) (arid3b), mRNA [NM_001083002]	GO:0005622|GO:0008150|GO:0005634|GO:0003677	NM_001083002	Dr.150509	571249	ENSDART00000103470	AT rich interactive domain 3B (Bright like)	TC366094	426.692	4076.77	9.03898	11.3533
A_15_P492672	-2.02607	-1.01868	2.02607	down	NM_001127333	chr11:11912918-11912859	cdc6	Danio rerio cell division cycle 6 homolog (S. cerevisiae) (cdc6), mRNA [NM_001127333]	GO:0017111|GO:0000166|GO:0005575|GO:0005524	NM_001127333	Dr.75702	402825	ENSDART00000011657	cell division cycle 6 homolog (S. cerevisiae)	TC395236	476.549	1925.03	9.17524	10.1939
A_15_P101201	-3.37479	-1.7548	3.37479	down	XM_686645	chr15:13481123-13481182	p4ha3	prolyl 4-hydroxylase, alpha polypeptide III [Source:ZFIN;Acc:ZDB-GENE-041010-4] [ENSDART00000043434]	GO:0031418|GO:0005506|GO:0005783|GO:0016706|GO:0016491|GO:0004656|GO:0016705|GO:0016702|GO:0055114	XM_686645		563281	ENSDART00000043434	prolyl 4-hydroxylase, alpha polypeptide III	TC371776	5.10465	38.9731	2.84537	4.60016
A_15_P187906	-2.19975	-1.13734	2.19975	down	NM_001135134	chr10:42581743-42581802	adrb3b	Danio rerio adrenergic receptor, beta 3b (adrb3b), mRNA [NM_001135134]	GO:0007165|GO:0016020|GO:0007186|GO:0004930|GO:0016021|GO:0004871	NM_001135134	Dr.92555	792519	ENSDART00000125314	adrenergic receptor, beta 3b	TC373835	5	19.2438	2.40516	3.5425
A_15_P723816	-3.34948	-1.74394	3.34948	down	NM_131620	chr8:49305548-49305407	ybx1	Danio rerio Y box binding protein 1 (ybx1), transcript variant 2, mRNA [NM_131620]	GO:0006355|GO:0003676|GO:0003677	NM_131620	Dr.59019	795398	ENSDART00000128057	Y box binding protein 1	TC408431	12051.8	54751.5	13.4848	15.2287
A_15_P659531	-2.37309	-1.24677	2.37309	down	NM_201142	chr7:19360611-19360670	rab1ba	Danio rerio zRAB1B, member RAS oncogene family a (rab1ba), mRNA [NM_201142]	GO:0000166|GO:0007264|GO:0015031|GO:0005525	NM_201142	Dr.78500	394117	ENSDART00000055810	zRAB1B, member RAS oncogene family a	NP13229189	118.143	637.828	7.31821	8.56498
A_15_P607742	-2.57781	-1.36615	2.57781	down	NM_001014345	chr9:9431602-9431543	cbsb	Danio rerio cystathionine-beta-synthase b (cbsb), mRNA [NM_001014345]	GO:0019343|GO:0005737|GO:0030554|GO:0006535|GO:0004122	NM_001014345	Dr.76887	266987	ENSDART00000121665	cystathionine-beta-synthase b	TC397968	395.736	2057.03	8.93326	10.2994
A_15_P103218	-2.17744	-1.12263	2.17744	down	NM_001126478	chr8:33892606-33892665	angptl2b	Danio rerio angiopoietin-like 2b (angptl2b), mRNA [NM_001126478]	GO:0001525	NM_001126478	Dr.1725	503514	ENSDART00000098836	angiopoietin-like 2b	TC423033	126.508	626.829	7.4168	8.53943
A_15_P414090	-2.95167	-1.56153	2.95167	down	NM_001080052	chr19:25384315-25385580	eya3	Danio rerio eyes absent homolog 3 (eya3), mRNA [NM_001080052]	GO:0007275	NM_001080052	Dr.148479	571385	ENSDART00000049840	eyes absent homolog 3	TC412947	16.7674	111.381	4.54014	6.10168
A_15_P192171	-3.16886	-1.66396	3.16886	down	XM_692206	chr20:19895522-19895581	chrna2b	cholinergic receptor, nicotinic, alpha polypeptide 2b (neuronal) [Source:ZFIN;Acc:ZDB-GENE-041001-99] [ENSDART00000079613]	GO:0005230|GO:0030054|GO:0016020|GO:0005886|GO:0045211|GO:0006810|GO:0045202|GO:0016021|GO:0005216|GO:0004889|GO:0006811	XM_692206		568849	ENSDART00000079613	cholinergic receptor, nicotinic, alpha polypeptide 2b (neuronal)	TC372868	40.8675	306.116	5.83704	7.501
A_15_P469335	-5.15063	-2.36475	5.15063	down	EB929206	chr10:11248865-11248924		si:ch211-126i22.5 [Source:ZFIN;Acc:ZDB-GENE-091204-183] [ENSDART00000135355]		XM_693147	Dr.87403		ENSDART00000135355		TC386501	6.45928	73.9947	3.16163	5.52638
A_15_P596745	-4.21024	-2.0739	4.21024	down	AJ311886	chr22:3376255-3376196	ptprsa	protein tyrosine phosphatase, receptor type, s, a [Source:ZFIN;Acc:ZDB-GENE-020107-3] [ENSDART00000145114]	GO:0016791|GO:0006470|GO:0021772|GO:0016787|GO:0016311|GO:0004721|GO:0004725	XM_001920918	Dr.75642	140820	ENSDART00000145114	protein tyrosine phosphatase, receptor type, s, a	TC419585	39.509	396.466	5.79087	7.86477
A_15_P723856	-2.04817	-1.03434	2.04817	down	NM_201484	chr17:32730084-32730143	ywhaqb	Danio rerio tyrosine 3-monooxygenase/tryptophan 5-monooxygenase activation protein, theta polypeptide b (ywhaqb), mRNA [NM_201484]	GO:0004497|GO:0019904|GO:0016491|GO:0055114	NM_201484	Dr.1068	335195	ENSDART00000018423	tyrosine 3-monooxygenase/tryptophan 5-monooxygenase activation protein, theta polypeptide b	TC388924	3690.69	11433.8	11.8373	12.8717
A_15_P732546	-3.21002	-1.68258	3.21002	down	NM_200569	chr14:29049929-29049870	tsc22d3	Danio rerio TSC22 domain family, member 3 (tsc22d3), mRNA [NM_200569]	GO:0006355|GO:0003700|GO:0005575	NM_200569	Dr.12437	393541	ENSDART00000054115	TSC22 domain family, member 3	TC399605	56.5969	426.579	6.29005	7.97263
A_15_P755121	-2.28249	-1.19061	2.28249	down	NM_001080033	chr5:24755451-24755510	zgc:158409	Danio rerio zgc:158409 (zgc:158409), mRNA [NM_001080033]	GO:0008150|GO:0031492|GO:0005634|GO:0000785	NM_001080033	Dr.76506	567263	ENSDART00000141011	zgc:158409	TC452539	10105.8	32194.3	13.2192	14.4098
A_15_P110357	-9.60755	-3.26417	9.60755	down	NM_001243038	chr7:40330997-40338060	creb3l1	Danio rerio cAMP responsive element binding protein 3-like 1 (creb3l1), mRNA [NM_001243038]	GO:0043565|GO:0006355|GO:0003700|GO:0003677	NM_001243038	Dr.76369	338317	ENSDART00000024330	cAMP responsive element binding protein 3-like 1	TC381956	5	82.0821	2.40516	5.66933
A_15_P106284	-2.30014	-1.20172	2.30014	down	NM_001083006	chr25:28654811-28654870	wasla	Danio rerio Wiskott-Aldrich syndrome-like a (wasla), mRNA [NM_001083006]	GO:0007015|GO:0003779	NM_001083006	Dr.83257	100009637	ENSDART00000149849	Wiskott-Aldrich syndrome-like a	TC367261	26.5662	140.995	5.22185	6.42357
A_15_P544017	-6.61203	-2.72509	6.61203	down	NM_001204248	chr17:39886115-39886174	eprs	Danio rerio glutamyl-prolyl-tRNA synthetase (eprs), mRNA [NM_001204248]	GO:0004818|GO:0016874|GO:0004827|GO:0005524|GO:0006412|GO:0004812|GO:0006418|GO:0005737|GO:0006424|GO:0006433|GO:0000166|GO:0043039|GO:0016876	NM_001204248	Dr.76655	562037	ENSDART00000075743	glutamyl-prolyl-tRNA synthetase	TC393562	41.8017	652.356	5.87368	8.59877
A_15_P625656	-2.48759	-1.31475	2.48759	down	NM_213026	chr6:9962437-9962496	sucla2	Danio rerio succinate-CoA ligase, ADP-forming, beta subunit (sucla2), mRNA [NM_213026]	GO:0016874|GO:0008152|GO:0003824|GO:0005524	NM_213026	Dr.76796	406299	ENSDART00000018503	succinate-CoA ligase, ADP-forming, beta subunit	TC381902	3256.2	12393.9	11.6726	12.9874
A_15_P681506	-2.11798	-1.08269	2.11798	down	XM_001919201	chr5:66767999-66768058		Rep: PREDICTED: centrosomal protein 110kDa isoform 6 - Pan troglodytes, partial (25%) [TC400993]		XM_001919201					TC400993	101.17	492.736	7.1063	8.18899
A_15_P306776	-2.29767	-1.20017	2.29767	down	NM_213245	chr20:19067269-19067328	tdh	Danio rerio L-threonine dehydrogenase (tdh), mRNA [NM_213245]	GO:0050662|GO:0003824|GO:0044237	NM_213245	Dr.10250	406528	ENSDART00000132928	L-threonine dehydrogenase	TC440394	590.679	2587.31	9.46111	10.6613
A_15_P131486	-2.73847	-1.45337	2.73847	down	NM_131337	chr20:30059677-30059618	sox11b	Danio rerio SRY-box containing gene 11b (sox11b), mRNA [NM_131337]	GO:0030182|GO:0009611	NM_131337	Dr.77148	30603	ENSDART00000141068	SRY-box containing gene 11b	TC367769	5247.96	20990.6	12.3181	13.7714
A_15_P492787	-12.6843	-3.66497	12.6843	down	NM_201336	chr22:38067344-38067285	pfn2	Danio rerio profilin 2 (pfn2), mRNA [NM_201336]	GO:0030036|GO:0003779	NM_201336	Dr.76326	394235		profilin 2	TC403492	64.7764	1869.46	6.48728	10.1523
A_15_P103926	-2.05395	-1.0384	2.05395	down	NM_131780	chr7:34987456-34987397	gro1	Danio rerio groucho 1 (gro1), mRNA [NM_131780]	GO:0006355|GO:0030099|GO:0005634	NM_131780	Dr.23459	100007463	ENSDART00000100020	groucho 1	TC395690	102.007	481.087	7.11793	8.15633
A_15_P274046	-2.8667	-1.51939	2.8667	down	NM_001080606	chr13:15171818-15171877	pank2	Danio rerio pantothenate kinase 2 (pank2), mRNA [NM_001080606]	GO:0004594|GO:0015937|GO:0005524	NM_001080606	Dr.150135	570866	ENSDART00000139308	pantothenate kinase 2	TC416320	39.0815	264.818	5.77687	7.29626
A_15_P753712	-2.07395	-1.05238	2.07395	down	NM_182859	chr16:16680306-16680247	crabp2a	Danio rerio cellular retinoic acid binding protein 2, a (crabp2a), mRNA [NM_182859]	GO:0005215|GO:0006810|GO:0008289	NM_182859	Dr.104443	171480	ENSDART00000059972	cellular retinoic acid binding protein 2, a	TC448141	855.585	3175.47	9.92584	10.9782
A_15_P608017	-2.70677	-1.43657	2.70677	down	CT698608	Zv9_scaffold3560:137312-137371		Uncharacterized protein [Source:UniProtKB/TrEMBL;Acc:H9GYA4] [ENSDART00000121650]		XM_003198328	Dr.127107		ENSDART00000121650		NP13317469	669.071	3334.89	9.61506	11.0516
A_15_P143731	-2.84402	-1.50793	2.84402	down	NM_213311	chr7:7471275-7471334	pnp5a	Danio rerio purine nucleoside phosphorylase 5a (pnp5a), mRNA [NM_213311]	GO:0006139|GO:0004731|GO:0016757|GO:0009116|GO:0003824|GO:0016740	NM_213311	Dr.105888	791647	ENSDART00000102681	purine nucleoside phosphorylase 5a	TC383874	170.201	1072.37	7.82091	9.32884
A_15_P712271	-2.68981	-1.42751	2.68981	down	NM_201133	chr21:42348716-42348775	stk10	Danio rerio serine/threonine kinase 10 (stk10), mRNA [NM_201133]	GO:0005886|GO:2000401|GO:0005524|GO:0042803|GO:0016310|GO:0007049|GO:0046777|GO:0004672|GO:0000166|GO:0016020|GO:0004674|GO:0016301|GO:0006468|GO:0016740|GO:0016772	NM_201133	Dr.26559	394108	ENSDART00000039982	serine/threonine kinase 10	TC366569	59.2198	373.488	6.35843	7.78593
A_15_P114257	-5.23088	-2.38705	5.23088	down	NM_213527	chr22:10844003-10844062	hiat1b	Danio rerio hippocampus abundant transcript 1b (hiat1b), mRNA [NM_213527]	GO:0005215|GO:0016020|GO:0005886|GO:0006810|GO:0016021|GO:0055085	NM_213527	Dr.132412	406848	ENSDART00000063207	hippocampus abundant transcript 1b	TC396231	228.014	2487.17	8.21116	10.5982
A_15_P303611	-2.33602	-1.22405	2.33602	down	NM_001077343	chr9:715234-714238	usp37	Danio rerio ubiquitin specific peptidase 37 (usp37), mRNA [NM_001077343]	GO:0071108|GO:0006511|GO:0021551|GO:0004843|GO:0035871|GO:0004197|GO:0000082|GO:0007049|GO:0007067|GO:0016787|GO:0006508|GO:0008233|GO:0004221|GO:0008234|GO:0051301	NM_001077343	Dr.150626	768201	ENSDART00000129632	ubiquitin specific peptidase 37	TC366419	18.4207	97.8793	4.68605	5.91011
A_15_P224036	-2.96969	-1.57031	2.96969	down	NM_001136249	chr17:44510304-44510363	naa30	Danio rerio N(alpha)-acetyltransferase 30, NatC catalytic subunit (naa30), mRNA [NM_001136249]	GO:0008080|GO:0005575	NM_001136249	Dr.118981	100192212	ENSDART00000130311	N(alpha)-acetyltransferase 30, NatC catalytic subunit	TC373194	23.7853	162.931	5.05852	6.62883
A_15_P107200	-2.05165	-1.03679	2.05165	down	NM_001044317	chr22:18460874-18460746	tmem161a	Danio rerio transmembrane protein 161A (tmem161a), mRNA [NM_001044317]	GO:0003674|GO:0016020|GO:0016021	NM_001044317	Dr.86254	492692	ENSDART00000027605	transmembrane protein 161A	TC384790	212.597	957.823	8.12017	9.15696
A_15_P485105	-4.82212	-2.26967	4.82212	down	NM_001024098	chr19:37007206-37007164	ptp4a2	Danio rerio protein tyrosine phosphatase type IVA, member 2 (ptp4a2), transcript variant 2, mRNA [NM_001024098]	GO:0016791|GO:0006470|GO:0016311|GO:0008138	NM_001024098	Dr.78374	334483	ENSDART00000051745	protein tyrosine phosphatase type IVA, member 2	TC434640	165.662	1751.18	7.78668	10.0563
A_15_P502897	-3.19195	-1.67444	3.19195	down	XM_005162654	chr24:14486002-14485162	zfhx2	zinc finger homeobox 2 [Source:HGNC Symbol;Acc:20152] [ENSDART00000122689]	GO:0043565|GO:0006355|GO:0003700|GO:0005634|GO:0003677|GO:0046872	XM_005162654		795005	ENSDART00000122689	zinc finger homeobox 2	TC380933	58.9725	442.054	6.35285	8.02729
A_15_P265091	-2.6371	-1.39895	2.6371	down		Zv9_NA908:000090633-000090692										23.2193	140.854	5.02265	6.42161
A_15_P578327	-2.34393	-1.22893	2.34393	down	NM_131418	chr5:70387650-70389608	coe2	Danio rerio coe2 (coe2), mRNA [NM_131418]	GO:0006355|GO:0046983|GO:0007275|GO:0005634|GO:0003677|GO:0046872|GO:0006351	NM_131418	Dr.75835	30692	ENSDART00000014822	coe2	TC396064	225.127	1138.31	8.19372	9.42265
A_15_P174826	-2.77618	-1.4731	2.77618	down	NM_201108	chr18:32385659-32385600	slc33a1	Danio rerio solute carrier family 33 (acetyl-CoA transporter), member 1 (slc33a1), mRNA [NM_201108]	GO:0008521|GO:0021955|GO:0016021	NM_201108	Dr.86986	394083	ENSDART00000015079	solute carrier family 33 (acetyl-CoA transporter), member 1	TC371169	94.4304	605.144	7.01153	8.48463
A_15_P116973	-2.76653	-1.46808	2.76653	down	NM_001005604	chr1:47906004-47906063	bcl9	Danio rerio B-cell CLL/lymphoma 9 (bcl9), mRNA [NM_001005604]		NM_001005604	Dr.79924	449616	ENSDART00000053284	B-cell CLL/lymphoma 9	TC365709	263.036	1546.82	8.39795	9.86603
A_15_P137526	-3.98235	-1.99362	3.98235	down	BC122410	chr22:4716548-4716489	zfr2	zinc finger RNA binding protein 2 [Source:ZFIN;Acc:ZDB-GENE-070705-184] [ENSDART00000128916]	GO:0008270|GO:0003676|GO:0046872		Dr.45921	567465	ENSDART00000128916	zinc finger RNA binding protein 2		7.17275	63.2646	3.30945	5.30307
A_15_P155216	-3.00988	-1.58971	3.00988	down	NM_201172	chr1:056972469-056972307	slc25a10	Danio rerio solute carrier family 25 (mitochondrial carrier; dicarboxylate transporter), member 10 (slc25a10), mRNA [NM_201172]	GO:0031966|GO:0016020|GO:0006810|GO:0016021|GO:0006839	NM_201172	Dr.113717	394147	ENSDART00000037576	solute carrier family 25 (mitochondrial carrier; dicarboxylate transporter), member 10	TC367801	92.591	640.618	6.98203	8.57174
A_15_P705946	-2.57111	-1.36239	2.57111	down	CO917926	chr2:16535120-16535061	zgc:158450	zgc:158450 [Source:ZFIN;Acc:ZDB-GENE-070112-702] [ENSDART00000087107]	GO:0003723|GO:0005575	XM_005168413	Dr.150258	572435	ENSDART00000087107	zgc:158450	TC365513	5877.04	21692.3	12.4716	13.834
A_15_P137031	-2.20719	-1.14221	2.20719	down	EE697538	chr25:35460514-35459145		DnaJ (Hsp40) homolog, subfamily A, member 4 [Source:HGNC Symbol;Acc:14885] [ENSDART00000073440]		XM_002666751	Dr.157088		ENSDART00000073440		TC378202	893.27	3482.97	9.97641	11.1186
A_15_P750011	-5.1167	-2.35521	5.1167	down	XM_002667001	chr25:6013997-6014055		tubulin, gamma complex associated protein 6 [Source:HGNC Symbol;Acc:18127] [ENSDART00000122952]		XM_002667001			ENSDART00000122952		TC421782	58.5183	696.545	6.34243	8.69764
A_15_P664986	-2.81565	-1.49347	2.81565	down	NM_001005395	chr3:19931195-19931191	ubtf	Danio rerio upstream binding transcription factor, RNA polymerase I (ubtf), mRNA [NM_001005395]		NM_001005395	Dr.81029	368509	ENSDART00000126915	upstream binding transcription factor, RNA polymerase I	TC373207	101.964	657.487	7.11718	8.61065
A_15_P143636	-2.76979	-1.46977	2.76979	down	NM_131685	chr16:12523661-12523720	atp1a3b	Danio rerio ATPase, Na+/K+ transporting, alpha 3b polypeptide (atp1a3b), mRNA [NM_131685]	GO:0015077|GO:0005524|GO:0046872|GO:0015672|GO:0019829|GO:0006754|GO:0000166|GO:0016020|GO:0016787|GO:0021591|GO:0007626|GO:0016820|GO:0016021|GO:0006812	NM_131685	Dr.122142	64611		ATPase, Na+/K+ transporting, alpha 3b polypeptide	TC365609	70.2123	454.63	6.60157	8.07134
A_15_P348585	-2.68197	-1.42329	2.68197	down	XM_003201578	Zv9_scaffold3535:36006-39966	myom2	myomesin 2 [Source:HGNC Symbol;Acc:7614] [ENSDART00000130478]		XM_003201578		100538326	ENSDART00000130478	myomesin (M-protein) 2, 165kDa	TC382451	88.672	549.019	6.92455	8.34785
A_15_P107790	-2.33249	-1.22187	2.33249	down	NM_001020625	chr25:20096931-20096872	zgc:110687	Danio rerio zgc:110687 (zgc:110687), mRNA [NM_001020625]	GO:0008150|GO:0003674|GO:0005575	NM_001020625	Dr.75383	553652	ENSDART00000147223	zgc:110687	TC410422	177.481	922.876	7.88266	9.10453
A_15_P225411	-3.03868	-1.60344	3.03868	down	BC151906	chr3:30639058-30638558	med25	mediator of RNA polymerase II transcription, subunit 25 homolog (yeast) [Source:ZFIN;Acc:ZDB-GENE-040426-2850] [ENSDART00000151367]	GO:0003674|GO:0006355|GO:0060021|GO:0005634|GO:0006351	XM_005163940	Dr.67653	406793	ENSDART00000151367	mediator of RNA polymerase II transcription, subunit 25 homolog (yeast)	TC394295	57.3702	410.492	6.31095	7.91439
A_15_P145831	-2.18641	-1.12856	2.18641	down	NM_001100028	chr5:25160375-25158382	stag2a	Danio rerio stromal antigen 2a (stag2a), mRNA [NM_001100028]		NM_001100028	Dr.78631	567168	ENSDART00000137655	stromal antigen 2a	TC366082	322.969	1474.71	8.66691	9.79547
A_15_P133216	-2.37625	-1.24868	2.37625	down	NM_199771	chr12:11550257-11550198	rac1a	Danio rerio ras-related C3 botulinum toxin substrate 1 (rho family, small GTP binding protein Rac1) (rac1), mRNA [NM_199771]	GO:0005622|GO:0042074|GO:0016020|GO:0000166|GO:0007264|GO:0007520|GO:0005525	NM_199771	Dr.155340	327204	ENSDART00000106172	ras-related C3 botulinum toxin substrate 1a (rho family, small GTP binding protein Rac1)	TC393637	2979.38	10816.4	11.544	12.7927
A_15_P534307	-2.44393	-1.2892	2.44393	down	NM_213416	chr11:13289958-13289899	elovl1b	Danio rerio elongation of very long chain fatty acids (FEN1/Elo2, SUR4/Elo3, yeast)-like 1b (elovl1b), mRNA [NM_213416]	GO:0008150|GO:0003674|GO:0016021	NM_213416	Dr.80539	406725	ENSDART00000145726	elongation of very long chain fatty acids (FEN1/Elo2, SUR4/Elo3, yeast)-like 1b	TC443255	175.119	955.837	7.86519	9.1544
A_15_P306756	-2.11235	-1.07885	2.11235	down	NM_131891	chr9:20574739-20574798	pknox1.1	Danio rerio pbx/knotted 1 homeobox 1.1 (pknox1.1), mRNA [NM_131891]	GO:0043565|GO:0006355|GO:0005737|GO:0003700|GO:0014033|GO:0005634|GO:0030902|GO:0003677	NM_131891	Dr.78334	798151	ENSDART00000129934	pbx/knotted 1 homeobox 1.1	TC440376	155.562	736.002	7.69826	8.77711
A_15_P494402	-2.0172	-1.01235	2.0172	down	XM_002667205	Zv9_NA915:57870-57811	LOC100331554	solute carrier family 37, member 3 [Source:HGNC Symbol;Acc:20651] [ENSDART00000097192]		XM_002667205		100331554	ENSDART00000097192	sugar phosphate exchanger 3-like	TC388480	39.0638	183.357	5.7765	6.78885
A_15_P750761	-2.20157	-1.13853	2.20157	down	NM_130971	chr3:41920786-41920845	lfng	Danio rerio lunatic fringe homolog (lfng), mRNA [NM_130971]	GO:0007389|GO:0033829|GO:0005794|GO:0016757|GO:0007275|GO:0046872|GO:0030154|GO:0007399|GO:0030173|GO:0007219|GO:0016020|GO:0045665|GO:0055016|GO:0016021|GO:0016740	NM_130971	Dr.1831	30158	ENSDART00000028673	lunatic fringe homolog	TC448094	4774.44	15564	12.1861	13.3246
A_15_P211506	-2.17666	-1.12212	2.17666	down	NM_001024388	chr15:22871549-22870068	hmbsb	Danio rerio hydroxymethylbilane synthase, b (hmbsb), mRNA [NM_001024388]	GO:0018160|GO:0005575|GO:0033014|GO:0004418	NM_001024388	Dr.78873	338290	ENSDART00000078396	hydroxymethylbilane synthase, b	TC391614	171.758	835.057	7.83752	8.95964
A_15_P134836	-2.48278	-1.31196	2.48278	down	BC095604	chr21:36511252-36511193		Danio rerio fibroblast growth factor receptor 4, mRNA (cDNA clone MGC:111935 IMAGE:7436221), complete cds. [BC095604]							TC366409	505.799	2435.09	9.25663	10.5686
A_15_P725221	-2.12305	-1.08614	2.12305	down	NM_201106	chr22:526427-526368	bysl	Danio rerio bystin-like (bysl), mRNA [NM_201106]		NM_201106	Dr.77976	394081	ENSDART00000001201	bystin-like	TC454128	3681.32	11805.6	11.8342	12.9203
A_15_P435485	-4.56109	-2.18938	4.56109	down	XM_687130	chr18:5171679-5171620	si:ch73-386h18.1	zinc finger homeobox 3 [Source:HGNC Symbol;Acc:777] [ENSDART00000138972]	GO:0043565|GO:0006355|GO:0003700|GO:0008270|GO:0005634|GO:0003676|GO:0003677|GO:0046872	XM_687130	Dr.106327	563768	ENSDART00000138972	si:ch73-386h18.1	TC392919	129.818	1322.52	7.45444	9.64382
A_15_P686661	-2.5021	-1.32314	2.5021	down	NM_199645	chr21:19848177-19848118	eif4ebp1	Danio rerio eukaryotic translation initiation factor 4E binding protein 1 (eif4ebp1), mRNA [NM_199645]	GO:0008190|GO:0045947|GO:0005575	NM_199645	Dr.78343	799566	ENSDART00000132091	eukaryotic translation initiation factor 4E binding protein 1	TC438666	806.929	3622.92	9.85317	11.1763
A_15_P117009	-2.40317	-1.26494	2.40317	down	NM_200569	chr14:29048831-29048772	tsc22d3	Danio rerio TSC22 domain family, member 3 (tsc22d3), mRNA [NM_200569]	GO:0006355|GO:0003700|GO:0005575	NM_200569	Dr.12437	393541	ENSDART00000054115	TSC22 domain family, member 3	TC419502	1103.87	4544.78	10.2549	11.5198
A_15_P749526	-2.31346	-1.21005	2.31346	down	NM_199523	chr1:53874259-53874318	ucp1	Danio rerio uncoupling protein 1 (ucp1), mRNA [NM_199523]	GO:0031966|GO:0016020|GO:0006810|GO:0071391|GO:0016021|GO:0006839	NM_199523	Dr.77108	83908	ENSDART00000038807	uncoupling protein 1	NP13225872	38.788	210.482	5.7655	6.97555
A_15_P108452	-3.21846	-1.68637	3.21846	down	NM_001007367	chr14:48953089-48953148	slu7	Danio rerio SLU7 splicing factor homolog (S. cerevisiae) (slu7), mRNA [NM_001007367]	GO:0008380|GO:0006397|GO:0008270|GO:0005681|GO:0005634|GO:0003676|GO:0046872	NM_001007367	Dr.3350	492495	ENSDART00000021319	SLU7 splicing factor homolog (S. cerevisiae)	TC434139	211.777	1479.26	8.11408	9.80045
A_15_P614572	-2.09821	-1.06916	2.09821	down	XM_687730	chr16:5655605-5655587	LOC564392	sphingomyelin phosphodiesterase, acid-like 3B [Source:HGNC Symbol;Acc:21416] [ENSDART00000002751]		XM_687730		564392	ENSDART00000002751	acid sphingomyelinase-like phosphodiesterase 3b-like	TC384312	1819.21	6173.28	10.8997	11.9689
A_15_P741791	-3.06192	-1.61444	3.06192	down	NM_178297	chr8:32289730-32289789	sepp1a	Danio rerio selenoprotein P, plasma, 1a (sepp1a), mRNA [NM_178297]	GO:0008430|GO:0005576	NM_178297	Dr.9483	352931	ENSDART00000140772	selenoprotein P, plasma, 1a	TC425017	3938.35	17979.7	11.9225	13.5369
A_15_P643061	-2.68874	-1.42693	2.68874	down	NM_001029967	chr13:31679469-31679410	rtn1a	Danio rerio reticulon 1a (rtn1a), transcript variant 1, mRNA [NM_001029967]	GO:0008150|GO:0003674	NM_001029967	Dr.77106	323706	ENSDART00000076574	reticulon 1a	TC392644	31.8967	199.305	5.4767	6.90363
A_15_P365175	-2.09714	-1.06843	2.09714	down	NM_201476	chr6:45875642-45875583	tardbp	Danio rerio TAR DNA binding protein (tardbp), mRNA [NM_201476]	GO:0000166|GO:0048675|GO:0007626|GO:0007409|GO:0003676	NM_201476	Dr.2409	325052	ENSDART00000058555	TAR DNA binding protein	TC433291	8668.5	25521	13.0033	14.0717
A_15_P659611	-2.9053	-1.53869	2.9053	down	NM_201454	chr2:21622852-21619705	rab2a	Danio rerio RAB2A, member RAS oncogene family (rab2a), mRNA [NM_201454]	GO:0000166|GO:0007264|GO:0015031|GO:0005525	NM_201454	Dr.76947	140617	ENSDART00000137538	RAB2A, member RAS oncogene family	NP13226157	1034.44	5180.96	10.1721	11.7108
A_15_P260021	-4.75071	-2.24814	4.75071	down	NM_200992	chr1:22116082-22116023	pds5a	Danio rerio PDS5, regulator of cohesion maintenance, homolog A (S. cerevisiae) (pds5a), mRNA [NM_200992]	GO:0007067|GO:0007049|GO:0005634|GO:0008156|GO:0051301	NM_200992	Dr.9343	393967	ENSDART00000033078	PDS5, regulator of cohesion maintenance, homolog A (S. cerevisiae)	TC381548	48.1351	535.793	6.06636	8.31451
A_15_P487695	-2.20325	-1.13963	2.20325	down	NM_200818	chr14:42779188-42779129	arl13a	Danio rerio ADP-ribosylation factor-like 13A (arl13a), mRNA [NM_200818]	GO:0005622|GO:0000166|GO:0007264|GO:0005525	NM_200818	Dr.133056	793658	ENSDART00000138917	ADP-ribosylation factor-like 13A	TC435815	5.26001	26.4051	2.89079	4.03042
A_15_P735861	-2.79665	-1.4837	2.79665	down	NM_001002386	chr7:69489633-69490216	kars	Danio rerio lysyl-tRNA synthetase (kars), mRNA [NM_001002386]	GO:0005737|GO:0000166|GO:0016874|GO:0006430|GO:0004824|GO:0003676|GO:0005524|GO:0004812|GO:0006418	NM_001002386	Dr.75960	280647	ENSDART00000064924	lysyl-tRNA synthetase	TC442141	2845.15	12204	11.4864	12.9701
A_15_P284486	-2.78002	-1.47509	2.78002	down	XM_005158030	chr16:28625079-28625020		si:ch211-273j9.2 [Source:ZFIN;Acc:ZDB-GENE-100922-276] [ENSDART00000130034]		XM_005158030			ENSDART00000130034		TC378261	5	23.8593	2.40516	3.88026
A_15_P716893	-2.78623	-1.47832	2.78623	down	BC066439	chr6:50822267-50822326	aga	Danio rerio aspartylglucosaminidase, mRNA (cDNA clone IMAGE:6967180). [BC066439]	GO:0016787		Dr.154982	566517		aspartylglucosaminidase	NP13321402	29.1561	188.486	5.35012	6.82843
A_15_P575102	-2.20689	-1.14201	2.20689	down	EE717629	chr12:19130130-19130189	trrap	transformation/transcription domain-associated protein [Source:ZFIN;Acc:ZDB-GENE-050809-47] [ENSDART00000152394]	GO:0008150|GO:0016773|GO:0005575|GO:0016772	XM_001919241	Dr.160042	557263	ENSDART00000152394	transformation/transcription domain-associated protein	TC380937	1295.54	4824.59	10.4616	11.6036
A_15_P227181	-2.28245	-1.19059	2.28245	down	NM_001007367	chr14:48944688-48944749	slu7	Danio rerio SLU7 splicing factor homolog (S. cerevisiae) (slu7), mRNA [NM_001007367]	GO:0008380|GO:0006397|GO:0008270|GO:0005681|GO:0005634|GO:0003676|GO:0046872	NM_001007367	Dr.3350	492495	ENSDART00000021319	SLU7 splicing factor homolog (S. cerevisiae)	TC395270	72.8577	390.797	6.65322	7.8438
A_15_P109462	-4.98679	-2.31811	4.98679	down	NM_130924	chr8:29251035-29251094	ptpn1	Danio rerio protein tyrosine phosphatase, non-receptor type 1 (ptpn1), mRNA [NM_130924]	GO:0016791|GO:0006470|GO:0016787|GO:0016311|GO:0004721|GO:0004725	NM_130924	Dr.8290	30081	ENSDART00000007718	protein tyrosine phosphatase, non-receptor type 1	TC438634	25.5552	301.372	5.16219	7.4803
A_15_P184276	-3.37764	-1.75602	3.37764	down	NM_001130598	chr20:33998564-33998505	sele	Danio rerio selectin E (sele), mRNA [NM_001130598]	GO:0016020|GO:0030246|GO:0007155	NM_001130598	Dr.119576	558139	ENSDART00000009440	selectin E	TC370565	5	28.8116	2.40516	4.16118
A_15_P758786	-2.23464	-1.16004	2.23464	down	XM_689623	chr3:29528733-29528792	cacna1i	calcium channel, voltage-dependent, T type, alpha 1I subunit [Source:ZFIN;Acc:ZDB-GENE-060503-324] [ENSDART00000145615]	GO:0016020|GO:0005245|GO:0070588|GO:0006810|GO:0016021|GO:0055085|GO:0005891|GO:0005216|GO:0006811	XM_689623		566351	ENSDART00000145615	calcium channel, voltage-dependent, T type, alpha 1I subunit	NP13317805	8.07829	40.4546	3.49405	4.6541
A_15_P562942	-4.4312	-2.1477	4.4312	down	NM_001142375	chr12:35416343-35416402	trim8b	Danio rerio tripartite motif containing protein 8 (trim8b), mRNA [NM_001142375]		NM_001142375	Dr.159764	797338	ENSDART00000085888	tripartite motif containing protein 8	TC365888	16.5485	167.354	4.52154	6.66924
A_15_P483245	-5.23819	-2.38907	5.23819	down	BC171336	chr13:18158842-18156798	fam21c	family with sequence similarity 21, member C [Source:ZFIN;Acc:ZDB-GENE-060825-87] [ENSDART00000128748]	GO:0008150|GO:0003674|GO:0071203	XM_005156705	Dr.3415	567272	ENSDART00000128748	family with sequence similarity 21, member C	TC373938	14.6404	175.466	4.34284	6.73191
A_15_P147251	-2.22373	-1.15298	2.22373	down	NM_001110283	chr5:52922958-52923017	ubac1	Danio rerio UBA domain containing 1 (ubac1), mRNA [NM_001110283]		NM_001110283	Dr.143451	795038	ENSDART00000083340	UBA domain containing 1	NP9492831	22.083	111.642	4.95175	6.10473
A_15_P725774	-3.0604	-1.61372	3.0604	down	NM_131105	chr7:31289238-31291818	tpma	Danio rerio alpha-tropomyosin (tpma), mRNA [NM_131105]	GO:0005737|GO:0003779|GO:0005856	NM_131105	Dr.47559	30324	ENSDART00000039657	alpha-tropomyosin	TC420945	16598	66573.3	13.9608	15.5746
A_15_P644051	-3.42135	-1.77457	3.42135	down	NM_131390	chr16:12979542-12979601	gsk3ab	Danio rerio glycogen synthase kinase 3 alpha b (gsk3ab), mRNA [NM_131390]	GO:0001947|GO:0016310|GO:0004672|GO:0000166|GO:0016301|GO:0004674|GO:0055013|GO:0006468|GO:0009953|GO:0005524|GO:0016740|GO:0016772	NM_131390	Dr.75529	30664	ENSDART00000111481	glycogen synthase kinase 3 alpha b	TC418764	23.3704	185.654	5.0326	6.80716
A_15_P105165	-2.75891	-1.4641	2.75891	down	NM_001007309	chr5:25724982-25725040	ctdnep1a	Danio rerio CTD nuclear envelope phosphatase 1a (ctdnep1a), mRNA [NM_001007309]	GO:0031965|GO:0010867|GO:0005783|GO:0071595|GO:0005634|GO:0005635|GO:0016791|GO:0006470|GO:0016020|GO:0016787|GO:0005789|GO:0004721|GO:0006998|GO:0004722|GO:0016021	NM_001007309	Dr.78429	492343	ENSDART00000029889	CTD nuclear envelope phosphatase 1a	TC369730	95.6442	609.477	7.02997	8.49406
A_15_P329406	-2.77157	-1.4707	2.77157	down	NM_131336	chr17:36057963-36057904	sox11a	Danio rerio SRY-box containing gene 11a (sox11a), mRNA [NM_131336]		NM_131336	Dr.4763	30602	ENSDART00000110040	SRY-box containing gene 11a	TC445346	188.876	1145.84	7.96163	9.43234
A_15_P273866	-2.44268	-1.28847	2.44268	down	NM_001045072	chr18:17386296-17386355	rspry1	Danio rerio ring finger and SPRY domain containing 1 (rspry1), mRNA [NM_001045072]	GO:0008270|GO:0046872	NM_001045072	Dr.132250	565154	ENSDART00000090608	ring finger and SPRY domain containing 1	TC410840	39.0232	223.899	5.77519	7.06366
A_15_P564247	-2.51985	-1.33334	2.51985	down	NM_207077	chr21:27875419-27875478	oat	Danio rerio organic anion transporter (oat), mRNA [NM_207077]	GO:0016020|GO:0005886|GO:0022857|GO:0016021|GO:0055085	NM_207077	Dr.107265	404609	ENSDART00000134150	organic anion transporter	TC420884	29.6164	172.228	5.37126	6.7046
A_15_P661656	-2.70958	-1.43807	2.70958	down	NM_001002668	chr19:33961807-33959035	zgc:91944	Danio rerio zgc:91944 (zgc:91944), mRNA [NM_001002668]	GO:0043565|GO:0006355|GO:0003700|GO:0005634|GO:0045893|GO:0003677	NM_001002668	Dr.31493	436941	ENSDART00000052101	zgc:91944	NP9494138	13.2559	80.1824	4.19988	5.63795
A_15_P333559	-2.23427	-1.1598	2.23427	down	NM_001079967	chr1:22151982-22152041	n4bp2	Danio rerio NEDD4 binding protein 2 (n4bp2), mRNA [NM_001079967]	GO:0005575	NM_001079967	Dr.83718	558048	ENSDART00000087658	NEDD4 binding protein 2	TC386789	18.284	92.8002	4.67606	5.83586
A_15_P687344	-8.58572	-3.10194	8.58572	down	NM_199586	Zv9_NA540:000010264-000010206	actn4	Danio rerio actinin, alpha 4 (actn4), mRNA [NM_199586]	GO:0005509|GO:0003779|GO:0051764|GO:0005575|GO:0051017	NM_199586	Dr.76952	322221	ENSDART00000032887	actinin, alpha 4	TC444038	37.2231	754.586	5.70815	8.81009
A_15_P710031	-2.8958	-1.53396	2.8958	down	DV594755	chr22:39423068-39423636		AGENCOURT_61887254 NIH_ZGC_14 Danio rerio cDNA clone IMAGE:8154590 5', mRNA sequence [DV594755]		XM_002666374	Dr.152017				TC403026	17.8851	117.789	4.64382	6.17779
A_15_P136491	-2.0106	-1.00763	2.0106	down	XM_692417	chr25:20496878-20496819	LOC569055	CCR4-NOT transcription complex, subunit 4 [Source:HGNC Symbol;Acc:7880] [ENSDART00000034714]		XM_692417		569055	ENSDART00000034714	CCR4-NOT transcription complex subunit 4-like	TC391269	60.8332	285.08	6.39352	7.40115
A_15_P336385	-48.6694	-5.60494	48.6694	down		chr12:3684606-3684665	im:7165146	sarcoglycan, alpha [Source:ZFIN;Acc:ZDB-GENE-041111-121] [ENSDART00000149427]				557170	ENSDART00000149427	im:7165146	TC395301	1189.34	87221	10.3507	15.9557
A_15_P133426	-3.14377	-1.6525	3.14377	down	NM_173253	chr15:1547137-1547758	smc4	Danio rerio structural maintenance of chromosomes 4 (smc4), mRNA [NM_173253]	GO:0051276|GO:0006281|GO:0030261|GO:0005694|GO:0007062|GO:0006310|GO:0005634|GO:0005524	NM_173253	Dr.77769	192332	ENSDART00000056765	structural maintenance of chromosomes 4	TC372606	108.51	776.756	7.20424	8.85674
A_15_P450735	-3.71683	-1.89407	3.71683	down	NM_001110026	chr14:34541225-34541287	zdhhc9	Danio rerio zinc finger, DHHC-type containing 9 (zdhhc9), mRNA [NM_001110026]	GO:0008270|GO:0046872	NM_001110026	Dr.132960	560095	ENSDART00000085335	zinc finger, DHHC-type containing 9	TC366376	45.8459	404.995	6.00104	7.89511
A_15_P168691	-2.74983	-1.45934	2.74983	down	XM_692426	chr18:43244970-43243824	srpr	signal recognition particle receptor (docking protein) [Source:ZFIN;Acc:ZDB-GENE-030219-11] [ENSDART00000086823]	GO:0006184|GO:0017111|GO:0005785|GO:0000166|GO:0006614|GO:0006810|GO:0003924|GO:0005047|GO:0005525|GO:0006886	XM_692426		569063	ENSDART00000086823	signal recognition particle receptor (docking protein)	TC383512	643.762	3270.17	9.56487	11.0242
A_15_P612997	-3.56114	-1.83234	3.56114	down	EL651351	chr21:11816291-11816232	pnpla7a	patatin-like phospholipase domain containing 7a [Source:ZFIN;Acc:ZDB-GENE-070112-1812] [ENSDART00000023504]	GO:0006629|GO:0016787|GO:0008152|GO:0005575		Dr.72126	791173	ENSDART00000023504	patatin-like phospholipase domain containing 7a	TC442988	7.97874	63.542	3.47769	5.31003
A_15_P261721	-3.13129	-1.64676	3.13129	down		chr4:003671312-003671254			GO:0009409|GO:0006950						TC437787	5.14667	36.3941	2.85909	4.50585
A_15_P660061	-2.49811	-1.32084	2.49811	down	NM_001077778	chr13:28244490-28234331	smap1	Danio rerio stromal membrane-associated protein 1 (smap1), mRNA [NM_001077778]	GO:0008060|GO:0032312|GO:0008270|GO:0046872	NM_001077778	Dr.84560	777731	ENSDART00000041036	stromal membrane-associated protein 1	TC386823	233.328	1253.03	8.24396	9.5648
A_15_P132136	-2.10636	-1.07475	2.10636	down	NM_131684	chr19:6952230-6952171	atp1a3a	Danio rerio ATPase, Na+/K+ transporting, alpha 3a polypeptide (atp1a3a), mRNA [NM_131684]	GO:0015077|GO:0005524|GO:0046872|GO:0015672|GO:0019829|GO:0006754|GO:0000166|GO:0016020|GO:0016787|GO:0021591|GO:0007626|GO:0016820|GO:0016021|GO:0006812	NM_131684	Dr.77442	64610	ENSDART00000104950	ATPase, Na+/K+ transporting, alpha 3a polypeptide	TC365531	125.72	603.331	7.40655	8.4813
A_15_P762596	-3.15858	-1.65927	3.15858	down		chr11:38410266-38410207		GB							NP13315934	18.3348	132.35	4.67944	6.33871
A_15_P118163	-2.4608	-1.29913	2.4608	down	XM_005158241	chr16:42028826-42038813		oxysterol binding protein-like 10 [Source:ZFIN;Acc:ZDB-GENE-081002-4] [ENSDART00000043823]		XM_005158241			ENSDART00000043823		TC385165	78.8725	452.909	6.7677	8.06682
A_15_P529587	-2.02673	-1.01916	2.02673	down	NM_198803	chr14:135836-135777	otop1	Danio rerio otopetrin 1 (otop1), mRNA [NM_198803]	GO:0045299|GO:0003674|GO:0042472|GO:0032475|GO:0016021|GO:0005615	NM_198803	Dr.77257	322893	ENSDART00000035581	otopetrin 1	TC432470	20.5157	94.6446	4.84149	5.86065
A_15_P628691	-2.44924	-1.29234	2.44924	down	NM_212855	chr3:24364063-24364004	nfe2l1a	Danio rerio nuclear factor, erythroid derived 2,-like 1a (nfe2l1a), mRNA [NM_212855]	GO:0043565|GO:0006355|GO:0003700|GO:0003677	NM_212855	Dr.79857	405781	ENSDART00000103982	nuclear factor, erythroid derived 2,-like 1a	TC368755	53.3751	306.76	6.21118	7.50351
A_15_P731836	-2.24986	-1.16983	2.24986	down	NM_198809	chr14:5869056-5870132	tubb4b	Danio rerio tubulin, beta 4B class IVb (tubb4b), mRNA [NM_198809]	GO:0006184|GO:0043234|GO:0051258|GO:0005737|GO:0000166|GO:0005874|GO:0005200|GO:0003924|GO:0007017|GO:0005856|GO:0005525	NM_198809	Dr.32367	336681	ENSDART00000041279	tubulin, beta 4B class IVb	TC428596	6046.16	19696.2	12.5104	13.6802
A_15_P663036	-4.90692	-2.29482	4.90692	down	NM_001005395	chr3:19939061-19939002	ubtf	Danio rerio upstream binding transcription factor, RNA polymerase I (ubtf), mRNA [NM_001005395]		NM_001005395	Dr.81029	368509	ENSDART00000126915	upstream binding transcription factor, RNA polymerase I	TC373207	59.543	679.556	6.36693	8.66175
A_15_P167981	-2.55508	-1.35337	2.55508	down	XM_005159148	chr18:17171852-17171793	b3gnt9	UDP-GlcNAc:betaGal beta-1,3-N-acetylglucosaminyltransferase 9 [Source:ZFIN;Acc:ZDB-GENE-060503-611] [ENSDART00000060997]	GO:0005794|GO:0016020|GO:0016757|GO:0006486|GO:0016021|GO:0008378|GO:0016740	XM_005159148		100034499	ENSDART00000060997	UDP-GlcNAc:betaGal beta-1,3-N-acetylglucosaminyltransferase 9	TC375392	14.2778	81.6137	4.30561	5.65897
A_15_P703836	-3.8254	-1.93561	3.8254	down	NM_201466	chr2:9939643-9939702	pfn2l	Danio rerio profilin 2 like (pfn2l), mRNA [NM_201466]	GO:0030036|GO:0003779	NM_201466	Dr.75574	321383	ENSDART00000053426	profilin 2 like	TC378277	5691.47	31085.7	12.4256	14.3612
A_15_P342265	-6.689	-2.74179	6.689	down	NM_200546	chr15:44562043-44561984	psmd2	Danio rerio proteasome (prosome, macropain) 26S subunit, non-ATPase, 2 (psmd2), mRNA [NM_200546]	GO:0000502|GO:0042176|GO:0030234	NM_200546	Dr.78209	393518	ENSDART00000123899	proteasome (prosome, macropain) 26S subunit, non-ATPase, 2	TC443925	69.089	1069.52	6.58168	9.32348
A_15_P120839	-2.22745	-1.15539	2.22745	down	NM_001020763	chr5:27733012-27732870	fam219ab	Danio rerio family with sequence similarity 219, member Ab (fam219ab), mRNA [NM_001020763]		NM_001020763	Dr.39651	553801	ENSDART00000145096	family with sequence similarity 219, member Ab	TC401662	18.0388	91.1283	4.65665	5.81205
A_15_P581312	-2.97956	-1.5751	2.97956	down	NM_131216	chr15:27054709-27053620	lhx1a	Danio rerio LIM homeobox 1a (lhx1a), mRNA [NM_131216]	GO:0001657|GO:0060429|GO:0003700|GO:0006366|GO:0007267|GO:0005634|GO:0009953|GO:0009791|GO:0072077|GO:0046872|GO:0009880|GO:0021702|GO:0072178|GO:0040019|GO:0090190|GO:2000744|GO:0001705|GO:0006355|GO:0001706|GO:0090009|GO:0001822|GO:0003714|GO:0021937|GO:2000543|GO:0007275|GO:0010842|GO:0060059|GO:0072049|GO:0003677|GO:0021527|GO:0021871|GO:0043565|GO:2000768|GO:0043234|GO:0008045|GO:0061205|GO:…	NM_131216	Dr.364	30463	ENSDART00000005641	LIM homeobox 1a	TC397710	17.1162	115.599	4.57388	6.14898
A_15_P595632	-3.50765	-1.8105	3.50765	down	XM_005166231	chr6:22341067-22341126		Uncharacterized protein [Source:UniProtKB/TrEMBL;Acc:E7F2A7] [ENSDART00000049465]		XM_005166231			ENSDART00000049465		TC443183	13.5438	106.753	4.23031	6.04081
A_15_P323236	-2.1907	-1.13139	2.1907	down	NM_001128751	chr13:15896112-15896171	fignl1	Danio rerio fidgetin-like 1 (fignl1), mRNA [NM_001128751]	GO:0017111|GO:0000166|GO:0005524	NM_001128751	Dr.77563	569539	ENSDART00000131390	fidgetin-like 1	TC369923	154.116	757.104	7.68638	8.81777
A_15_P181311	-2.08153	-1.05764	2.08153	down	XM_002666073	chr21:41883795-41883736	LOC100329397	ankyrin repeat domain 46a [Source:ZFIN;Acc:ZDB-GENE-030131-2643] [ENSDART00000065105]		XM_002666073		100329397	ENSDART00000065105	ankyrin repeat domain-containing protein 46-like	TC450324	21.7736	102.786	4.92843	5.98607
A_15_P274211	-2.10438	-1.0734	2.10438	down	NM_212748	chr24:40431812-40431753	rpn2	Danio rerio ribophorin II (rpn2), mRNA [NM_212748]	GO:0016021|GO:0006487|GO:0008250	NM_212748	Dr.121129	335985	ENSDART00000010684	ribophorin II	TC405955	2703.51	8795.64	11.4202	12.4936
A_15_P730876	-2.09626	-1.06782	2.09626	down	NM_197933	chr20:31245562-31245621	pdip5	Danio rerio protein disulfide isomerase-related protein (provisional) (pdip5), mRNA [NM_197933]	GO:0006662|GO:0015035|GO:0009055|GO:0045454|GO:0016853	NM_197933	Dr.76967	322160	ENSDART00000020252	protein disulfide isomerase-related protein (provisional)	NP13225715	794.911	3011.88	9.8343	10.9021
A_15_P113173	-4.34249	-2.11852	4.34249	down	NM_001083550	chr7:7734144-7734085	klc2	Danio rerio kinesin light chain 2 (klc2), mRNA [NM_001083550]	GO:0005871|GO:0003777	NM_001083550	Dr.78419	562365	ENSDART00000111327	kinesin light chain 2	TC370146	29.9939	307.399	5.38932	7.50784
A_15_P687056	-13.7455	-3.78089	13.7455	down	XM_681589	chr24:24784291-24784350	si:dkey-226l10.6	zinc finger protein 768 [Source:HGNC Symbol;Acc:26273] [ENSDART00000127842]	GO:0003676|GO:0046872	XM_681589		558387	ENSDART00000127842	si:dkey-226l10.6	TC383630	16.0001	517.186	4.47933	8.26022
A_15_P134551	-2.33939	-1.22613	2.33939	down	NM_001003847	chr14:12686521-12686578	thoc2	Danio rerio THO complex 2 (thoc2), mRNA [NM_001003847]		NM_001003847	Dr.77325	368417	ENSDART00000054611	THO complex 2	TC435263	22.7377	121.074	4.99035	6.21648
A_15_P198626	-3.35036	-1.74432	3.35036	down	NM_001040384	chr2:22437609-22437550	zgc:136639	Danio rerio zgc:136639 (zgc:136639), mRNA [NM_001040384]	GO:0006355|GO:0005634	NM_001040384	Dr.107256	678639	ENSDART00000099735	zgc:136639	TC376100	17.3617	132.414	4.59541	6.33973
A_15_P113492	-2.53601	-1.34256	2.53601	down	AJ715535	Zv9_scaffold3477:34737-34678		ST8 alpha-N-acetyl-neuraminide alpha-2,8-sialyltransferase 1 [Source:ZFIN;Acc:ZDB-GENE-051005-1] [ENSDART00000078125]		XM_005170806	Dr.151858		ENSDART00000078125		TC414029	79.72	470.931	6.78116	8.12372
A_15_P334039	-2.31936	-1.21373	2.31936	down	EE303815	chr19:12594872-12594813		Uncharacterized protein [Source:UniProtKB/TrEMBL;Acc:F1R4A3] [ENSDART00000122962]		XM_005159589	Dr.160275		ENSDART00000122962		TC441306	24.2619	128.559	5.08702	6.30075
A_15_P528487	-3.12876	-1.64559	3.12876	down	XM_690166	chr17:31692490-31692434		PREDICTED: Danio rerio zinc finger protein 839 (znf839), mRNA [XM_690166]		XM_690166					TC379954	19.5739	140.732	4.77437	6.41997
A_15_P395830	-3.0919	-1.62849	3.0919	down	XM_001335895	chr16:30802969-30803028	fam171a1	family with sequence similarity 171, member A1 [Source:ZFIN;Acc:ZDB-GENE-061208-1] [ENSDART00000109450]		XM_001335895		795681	ENSDART00000109450	family with sequence similarity 171, member A1	TC403834	227.108	1515.09	8.20716	9.83566
A_15_P373030	-2.04532	-1.03233	2.04532	down	EE203162	chr8:41528302-41528361		leucine zipper, putative tumor suppressor 1 [Source:ZFIN;Acc:ZDB-GENE-081104-431] [ENSDART00000113511]		XM_692658	Dr.70348		ENSDART00000113511		TC391852	21.4605	100.14	4.9093	5.94163
A_15_P416310	-2.11277	-1.07914	2.11277	down	NM_213146	chr2:10152155-10152096	wls	Danio rerio wntless homolog (Drosophila) (wls), mRNA [NM_213146]	GO:0017147|GO:0030917|GO:0005575|GO:0016055|GO:0060872	NM_213146	Dr.76832	406420	ENSDART00000130302	wntless homolog (Drosophila)	TC392101	613.67	2468.76	9.50829	10.5874
A_15_P104564	-2.10772	-1.07568	2.10772	down	NM_001033108	chr14:27419980-27416808	tmed9	Danio rerio transmembrane emp24 protein transport domain containing 9 (tmed9), mRNA [NM_001033108]	GO:0003674|GO:0016020|GO:0006810|GO:0016021	NM_001033108	Dr.76529	613145	ENSDART00000130482	transmembrane emp24 protein transport domain containing 9	NP13228415	2034.12	6841.03	11.0471	12.1228
A_15_P298541	-4.07394	-2.02643	4.07394	down	CR930573	chr21:36123182-36123123		drebrin 1 [Source:ZFIN;Acc:ZDB-GENE-091204-284] [ENSDART00000100310]		XM_005173880	Dr.159997		ENSDART00000100310		TC411800	13.8658	127.415	4.26138	6.2878
A_15_P639461	-16.4041	-4.03599	16.4041	down	NM_001020516	chr12:43233180-43232454	dpysl4	Danio rerio dihydropyrimidinase-like 4 (dpysl4), mRNA [NM_001020516]	GO:0005737|GO:0016810|GO:0016787|GO:0016812|GO:0006208	NM_001020516	Dr.45429	553411	ENSDART00000044597	dihydropyrimidinase-like 4	TC368448	6.87361	262.598	3.24636	7.28235
A_15_P574317	-4.53612	-2.18146	4.53612	down	BC134065	chr23:2096621-2096680		si:dkey-18j14.5 [Source:ZFIN;Acc:ZDB-GENE-121214-285] [ENSDART00000152541]			Dr.151442		ENSDART00000152541		TC409441	381.828	3356.9	8.88141	11.0629
A_15_P724196	-2.79716	-1.48396	2.79716	down	NM_001083023	chr6:39272625-39272471	zgc:158846	Danio rerio zgc:158846 (zgc:158846), mRNA [NM_001083023]	GO:0005882|GO:0008150|GO:0005198|GO:0045095	NM_001083023	Dr.4854	100009654	ENSDART00000104074	zgc:158846	TC456534	64.1906	423.69	6.4749	7.95886
A_15_P772947	-2.01726	-1.0124	2.01726	down	NM_001114894	chr4:31337729-31337784	zgc:174653	Danio rerio zgc:174653 (zgc:174653), mRNA [NM_001114894]	GO:0008150|GO:0003674|GO:0005575	NM_001114894	Dr.122038	100141328	ENSDART00000129771	zgc:174653	NP13318923	3948.04	11924.1	11.9255	12.9378
A_15_P269456	-2.19147	-1.1319	2.19147	down	XM_005164193	chr3:43998831-43998890	LOC562570	extracellular leucine-rich repeat and fibronectin type III domain containing 1 [Source:HGNC Symbol;Acc:33154] [ENSDART00000111535]		XM_005164193		562570	ENSDART00000111535	protein ELFN1-like	TC399311	5	19.2066	2.40516	3.53706
A_15_P148211	-3.25641	-1.70328	3.25641	down	NM_201327	chr24:43867408-43867467	ssr1	Danio rerio signal sequence receptor, alpha (ssr1), mRNA [NM_201327]	GO:0005783|GO:0071391	NM_201327	Dr.77292	373100		signal sequence receptor, alpha	TC448116	320.876	2135.39	8.65873	10.362
A_15_P658996	-2.78441	-1.47737	2.78441	down	BC164276	chr22:12285459-12285518	ccnt2b	Danio rerio zgc:55690, mRNA (cDNA clone MGC:191451 IMAGE:100059760), complete cds. [BC164276]	GO:0006355|GO:0019901|GO:0005575|GO:0000079		Dr.76751	321464		cyclin T2b	TC380376	1395.31	6391.76	10.5454	12.0228
A_15_P182011	-3.00042	-1.58516	3.00042	down	GW709450	chr19:10081518-10081577	si:ch211-288g17.3	si:ch211-288g17.3 [Source:ZFIN;Acc:ZDB-GENE-030131-461] [ENSDART00000104620]	GO:0003677	XM_701324	Dr.159445	567638	ENSDART00000104620	si:ch211-288g17.3	TC440939	8796.71	37060.7	13.022	14.6071
A_15_P736276	-2.19117	-1.1317	2.19117	down	NM_001077611	chr9:10943141-10952100	dars	Danio rerio aspartyl-tRNA synthetase (dars), mRNA [NM_001077611]	GO:0006422|GO:0005737|GO:0000166|GO:0016874|GO:0004815|GO:0003676|GO:0006412|GO:0005524|GO:0004812|GO:0006418	NM_001077611	Dr.51867	324025	ENSDART00000102472	aspartyl-tRNA synthetase	NP13316107	705.241	2863.91	9.68621	10.8179
A_15_P754611	-2.59986	-1.37843	2.59986	down	NM_001045026	chr19:32848745-32848686	fam65b	Danio rerio family with sequence similarity 65, member B (fam65b), mRNA [NM_001045026]		NM_001045026	Dr.86593	563800	ENSDART00000131721	family with sequence similarity 65, member B	TC366595	25.175	151.135	5.14377	6.5222
A_15_P770977	-2.51789	-1.33221	2.51789	down	NM_001114884	Zv9_scaffold3453:42110-42074	zgc:174696	Danio rerio zgc:174696 (zgc:174696), mRNA [NM_001114884]	GO:0003676|GO:0046872	NM_001114884	Dr.105662	324116	ENSDART00000113768	zgc:174696	TC440441	23.4822	135.927	5.03999	6.3722
A_15_P724576	-2.8396	-1.50569	2.8396	down	BC091672	chr3:39558190-39558249	LOC793164	Danio rerio cDNA clone IMAGE:7140994. [BC091672]		XM_005164177	Dr.30045	793164		uncharacterized LOC793164	TC424122	49.6828	330.653	6.10983	7.61551
A_15_P648911	-2.08603	-1.06076	2.08603	down	NM_152965	chr1:38827551-38827492	glra3	Danio rerio glycine receptor, alpha 3 (glra3), mRNA [NM_152965]	GO:0005230|GO:0030054|GO:0022824|GO:0016020|GO:0005886|GO:0005887|GO:0045211|GO:0016594|GO:0006810|GO:0045202|GO:0016021|GO:0006811	NM_152965	Dr.12384	192124	ENSDART00000009777	glycine receptor, alpha 3	TC369886	34.8451	166.684	5.60247	6.66323
A_15_P660136	-2.70693	-1.43666	2.70693	down	NM_001002692	chr7:60868484-60870519	ppp1r14bb	Danio rerio protein phosphatase 1, regulatory (inhibitor) subunit 14Bb (ppp1r14bb), mRNA [NM_001002692]	GO:0042325|GO:0005737	NM_001002692	Dr.486	100000577	ENSDART00000039827	protein phosphatase 1, regulatory (inhibitor) subunit 14Bb	NP13225236	483.571	2539.38	9.19498	10.6316
A_15_P348935	-2.0008	-1.00058	2.0008	down	NM_199973	chr2:2954687-2954628	usp14	Danio rerio ubiquitin specific protease 14 (tRNA-guanine transglycosylase) (usp14), mRNA [NM_199973]	GO:0006511|GO:0016787|GO:0006508|GO:0008233|GO:0008234|GO:0004221	NM_199973	Dr.104685	335736	ENSDART00000032540	ubiquitin specific protease 14 (tRNA-guanine transglycosylase)	TC382905	1381.42	4576.71	10.532	11.5326
A_15_P308791	-10.8957	-3.44568	10.8957	down	XM_005161545	chr22:2493865-2493924		si:ch73-138e16.7 [Source:ZFIN;Acc:ZDB-GENE-070705-206] [ENSDART00000147738]		XM_005161545			ENSDART00000147738		TC388273	20.213	519.069	4.81955	8.26523
A_15_P112280	-3.23404	-1.69334	3.23404	down	M24635	chr7:31288740-31288799	tpma	Zebrafish (B.rerio) skeletal muscle alpha-tropomyosin mRNA, complete cds. [M24635]	GO:0005737|GO:0003779|GO:0005856	XM_005168854	Dr.47559	30324		alpha-tropomyosin	TC438905	3351.8	16443.7	11.7152	13.4086
A_15_P106841	-2.03103	-1.02221	2.03103	down	NM_001097587	chr14:35090282-35090154	cyfip2	Danio rerio cytoplasmic FMR1 interacting protein 2 (cyfip2), mRNA [NM_001097587]	GO:0031290|GO:0003674|GO:0005737|GO:0010842	NM_001097587	Dr.83830	100002872	ENSDART00000020014	cytoplasmic FMR1 interacting protein 2	TC365886	34.2992	160	5.57797	6.60019
A_15_P115741	-3.56963	-1.83578	3.56963	down	NM_001013516	chr8:41598865-41598924	msi1	Danio rerio musashi homolog 1 (Drosophila) (msi1), mRNA [NM_001013516]	GO:0000166|GO:0005575|GO:0007417|GO:0003676	NM_001013516	Dr.36054	541389	ENSDART00000041634	musashi homolog 1 (Drosophila)	TC395024	1176.19	7054.59	10.337	12.1727
A_15_P633501	-2.95532	-1.56332	2.95532	down	NM_183072	chr6:1390536-1390892	txnrd1	Danio rerio thioredoxin reductase 1 (txnrd1), mRNA [NM_183072]	GO:0050661|GO:0016668|GO:0050660|GO:0016491|GO:0015035|GO:0009055|GO:0004791|GO:0045454|GO:0055114	NM_183072	Dr.77564	352924	ENSDART00000064709	thioredoxin reductase 1	TC379979	1350.57	6595.09	10.5065	12.0699
A_15_P133981	-2.1767	-1.12214	2.1767	down	NM_214683	chr22:15845383-15845184	safb	Danio rerio scaffold attachment factor B (safb), mRNA [NM_214683]	GO:0000166|GO:0003676	NM_214683	Dr.2918	321979	ENSDART00000127016	scaffold attachment factor B	TC373088	1544.95	5484.38	10.6797	11.8019
A_15_P121063	-2.34988	-1.23259	2.34988	down	NM_001007771	chr3:36748821-36748880	glyr1	Danio rerio glyoxylate reductase 1 homolog (Arabidopsis) (glyr1), mRNA [NM_001007771]	GO:0050662|GO:0004616|GO:0016491|GO:0005634|GO:0035064|GO:0006098|GO:0055114|GO:0016616	NM_001007771	Dr.77851	493611	ENSDART00000055239	glyoxylate reductase 1 homolog (Arabidopsis)	TC368681	946.328	3902.47	10.0575	11.29
A_15_P442180	-3.05118	-1.60937	3.05118	down	NM_001098177	chr6:7673529-7673470	myh9a	Danio rerio myosin, heavy polypeptide 9a, non-muscle (myh9a), mRNA [NM_001098177]	GO:0003774|GO:0051015|GO:0072015|GO:0000166|GO:0072104|GO:0003779|GO:0016459|GO:0032836|GO:0005524|GO:0032835	NM_001098177	Dr.9044	333938	ENSDART00000011353	myosin, heavy polypeptide 9a, non-muscle	TC375474	22.4722	158.176	4.97399	6.58336
A_15_P437735	-2.14524	-1.10114	2.14524	down	NM_001080045	chr8:41930213-41930154	asphd2	Danio rerio aspartate beta-hydroxylase domain containing 2 (asphd2), mRNA [NM_001080045]	GO:0016020|GO:0018193|GO:0016491|GO:0051213|GO:0016021|GO:0055114	NM_001080045	Dr.6171	569819	ENSDART00000140127	aspartate beta-hydroxylase domain containing 2	TC421057	58.7829	294.848	6.34872	7.44985
A_15_P194096	-2.7672	-1.46843	2.7672	down	NM_001002726	chr17:15020690-15018526	wdhd1	Danio rerio WD repeat and HMG-box DNA binding protein 1 (wdhd1), mRNA [NM_001002726]	GO:0008150|GO:0003674|GO:0005575	NM_001002726	Dr.52170	436999	ENSDART00000002176	WD repeat and HMG-box DNA binding protein 1	TC373733	59.7149	389.096	6.36946	7.83789
A_15_P486380	-3.20991	-1.68253	3.20991	down	NM_001013278	chr8:20640660-20638565	rfx2	Danio rerio regulatory factor X, 2 (influences HLA class II expression) (rfx2), mRNA [NM_001013278]	GO:0007368|GO:0006355|GO:0005634|GO:0070121|GO:0003677|GO:0006351	NM_001013278	Dr.78697	503590	ENSDART00000122943	regulatory factor X, 2 (influences HLA class II expression)	TC422345	23.6434	175.948	5.05203	6.73456
A_15_P418405	-2.13193	-1.09216	2.13193	down	XM_005173861	chr21:1294751-1294810		Uncharacterized protein [Source:UniProtKB/TrEMBL;Acc:E7EYI1] [ENSDART00000129678]		XM_005173861			ENSDART00000129678		TC391787	5.61657	27.0074	2.97636	4.06852
A_15_P170431	-2.12751	-1.08916	2.12751	down	NM_001077270	chr20:50222041-50222100	ints9	Danio rerio integrator complex subunit 9 (ints9), mRNA [NM_001077270]	GO:0016787|GO:0032039|GO:0016180	NM_001077270	Dr.116109	768124	ENSDART00000097865	integrator complex subunit 9	TC368897	82.3631	409.797	6.8227	7.91187
A_15_P229466	-4.42164	-2.14458	4.42164	down	EB949552	chr1:47063559-47063618		mcf.2 cell line derived transforming sequence-like a [Source:ZFIN;Acc:ZDB-GENE-090312-122] [ENSDART00000114083]		XM_001922148	Dr.158361		ENSDART00000114083		TC391389	5	37.5802	2.40516	4.54975
A_15_P153281	-2.23259	-1.15872	2.23259	down	NM_001099248	chr7:14499719-14499778	ankdd1a	Danio rerio ankyrin repeat and death domain containing 1A (ankdd1a), mRNA [NM_001099248]	GO:0007165|GO:0005575	NM_001099248	Dr.84654	569271	ENSDART00000021985	ankyrin repeat and death domain containing 1A	TC366480	61.0849	318.563	6.40128	7.56
A_15_P372077	-2.16053	-1.11139	2.16053	down	CT591456	chr12:30773818-30773759	si:ch211-214e3.5	si:ch211-214e3.5 [Source:ZFIN;Acc:ZDB-GENE-050208-19] [ENSDART00000115358]	GO:0008150|GO:0003674|GO:0005575	XM_001338990	Dr.102877	798582	ENSDART00000115358	si:ch211-214e3.5	TC386938	32.1332	159.839	5.48685	6.59824
A_15_P415850	-2.17558	-1.1214	2.17558	down	NM_001098189	chr6:8686238-8686179	vps16	Danio rerio zgc:162584 (zgc:162584), mRNA [NM_001098189]	GO:0003674|GO:0005737|GO:0006886	NM_001098189	Dr.39353	798985	ENSDART00000151764	vacuolar protein sorting protein 16	TC366527	44.3885	226.716	5.95957	7.08097
A_15_P171646	-3.49667	-1.80598	3.49667	down	NM_001083855	chr8:19055143-19055084	nexn	Danio rerio nexilin (F actin binding protein) (nexn), mRNA [NM_001083855]	GO:0030334|GO:0048739|GO:0030018|GO:0051015	NM_001083855	Dr.76040	573301	ENSDART00000149506	nexilin (F actin binding protein)	TC377153	46.3115	383.066	6.01409	7.82007
A_15_P737577	-2.28658	-1.19319	2.28658	down	CT659459	chr5:54766732-54766673	wu:fa12f04	CT659459 ZF_mu Danio rerio cDNA clone ZF_mu_10e09 5', mRNA sequence [CT659459]			Dr.75212	335060		wu:fa12f04	TC416585	2172.02	7820.62	11.1315	12.3247
A_15_P130481	-13.8259	-3.78931	13.8259	down	NM_205753	chr22:14062773-14062832	sh3bp4a	Danio rerio SH3-domain binding protein 4a (sh3bp4a), mRNA [NM_205753]	GO:0030308|GO:0032007|GO:0008285|GO:0030136|GO:0005634|GO:0031410|GO:0006897|GO:0005737|GO:0005905|GO:0071230|GO:0016020|GO:0005092|GO:0034260|GO:0010508	NM_205753	Dr.17077	403082	ENSDART00000080307	SH3-domain binding protein 4a	TC420017	5.10049	163.501	2.84378	6.63309
A_15_P502137	-2.18327	-1.12649	2.18327	down	EG584599	chr8:44696286-44696227		si:ch73-138n13.1 [Source:ZFIN;Acc:ZDB-GENE-091204-448] [ENSDART00000111894]		XM_002663199	Dr.151623		ENSDART00000111894		TC398660	26.4134	132.45	5.21342	6.33991
A_15_P108293	-2.81483	-1.49305	2.81483	down	NM_001114342	chr19:5969919-5969860	si:dkeyp-113d7.4	Danio rerio si:dkeyp-113d7.4 (si:dkeyp-113d7.4), mRNA [NM_001114342]	GO:0005882|GO:0008150|GO:0005198	NM_001114342	Dr.76499	553371	ENSDART00000066620	si:dkeyp-113d7.4	TC427161	227.405	1377.12	8.20921	9.70225
A_15_P492782	-2.08188	-1.05789	2.08188	down	NM_001109707	chr7:19834662-19834603	coro1b	Danio rerio coronin, actin binding protein, 1B (coro1b), mRNA [NM_001109707]	GO:0008150	NM_001109707	Dr.77832	560168	ENSDART00000021559	coronin, actin binding protein, 1B	TC417982	169.033	783.696	7.81285	8.87074
A_15_P737066	-2.2352	-1.1604	2.2352	down	NM_001033111	chr19:8254560-8254619	pygo2	Danio rerio pygopus homolog 2 (Drosophila) (pygo2), mRNA [NM_001033111]	GO:0008270|GO:0005575|GO:0046872	NM_001033111	Dr.159286	613247	ENSDART00000131324	pygopus homolog 2 (Drosophila)	TC368274	1082.02	4158.39	10.2252	11.3856
A_15_P751846	-3.05397	-1.61069	3.05397	down	NM_182968	chr19:41962638-41962696	col1a2	Danio rerio collagen, type I, alpha 2 (col1a2), mRNA [NM_182968]	GO:0005581|GO:0009612|GO:0005201	NM_182968	Dr.75575	336471	ENSDART00000042990	collagen, type I, alpha 2	TC444360	4291.1	19322.8	12.0356	13.6463
A_15_P710006	-2.05221	-1.03718	2.05221	down	NM_201088	chr1:60290814-60290873	parn	Danio rerio poly(A)-specific ribonuclease (deadenylation nuclease) (parn), mRNA [NM_201088]	GO:0004535|GO:0005737|GO:0004527|GO:0004518|GO:0016787|GO:0000166|GO:0003723|GO:0005634|GO:0006402|GO:0003676|GO:0046872	NM_201088	Dr.78689	791461	ENSDART00000152384	poly(A)-specific ribonuclease (deadenylation nuclease)	TC435374	20.8627	97.6368	4.86865	5.90583
A_15_P172211	-2.00405	-1.00292	2.00405	down	NM_201326	chr14:12425014-12425073	hspa9	Danio rerio heat shock protein 9 (hspa9), mRNA [NM_201326]	GO:0030097|GO:0031101|GO:0000166|GO:0006457|GO:0005759|GO:0006950|GO:0051082|GO:0016887|GO:0005524	NM_201326	Dr.76128	373085	ENSDART00000012438	heat shock protein 9	TC366899	7040.21	20345.4	12.7237	13.7266
A_15_P367935	-2.70652	-1.43644	2.70652	down	DV593441	chr12:14998705-14998646	si:dkey-9l5.5	DBF4 homolog B (S. cerevisiae) [Source:HGNC Symbol;Acc:17883] [ENSDART00000128213]	GO:0008270|GO:0003676	XM_690038	Dr.51996	566753	ENSDART00000128213	si:dkey-9l5.5	TC410076	26.7847	167.414	5.23424	6.67068
A_15_P310541	-2.13827	-1.09645	2.13827	down		chr1:51913949-51914008	LOC795933	autophagy related 4D, cysteine peptidase [Source:HGNC Symbol;Acc:20789] [ENSDART00000152289]				795933	ENSDART00000152289	cysteine protease ATG4D-like	TC436764	93.9654	463.261	7.00427	8.10072
A_15_P100864	-3.91404	-1.96866	3.91404	down	NM_001024404	chr20:3355806-3355747	marcksa	Danio rerio myristoylated alanine rich protein kinase C substrate a (marcksa), mRNA [NM_001024404]	GO:0016310|GO:0005516|GO:0060541|GO:0016301|GO:0007420|GO:0010842|GO:0005575|GO:0035914|GO:0016740	NM_001024404	Dr.78590	554102	ENSDART00000123096	myristoylated alanine rich protein kinase C substrate a	TC414929	21.6518	197.175	4.92032	6.88898
A_15_P404495	-2.86894	-1.52052	2.86894	down	NM_200405	chr15:24848648-24848589	hif1al	Danio rerio hypoxia-inducible factor 1, alpha subunit, like (hif1al), mRNA [NM_200405]	GO:0014823|GO:0007165|GO:0005667|GO:0006355|GO:0005737|GO:0003700|GO:0046983|GO:0005634|GO:0004871|GO:0051402|GO:0003677|GO:0006351	NM_200405	Dr.11978	393376	ENSDART00000023421	hypoxia-inducible factor 1, alpha subunit, like	TC404499	307.592	1842.31	8.60925	10.1298
A_15_P137491	-2.5451	-1.34772	2.5451	down	NM_001082805	chr22:3967961-3968020	kdm4b	Danio rerio lysine (K)-specific demethylase 4B (kdm4b), mRNA [NM_001082805]	GO:0008270|GO:0005634|GO:0046872	NM_001082805	Dr.81759	556504	ENSDART00000034084	lysine (K)-specific demethylase 4B	TC366382	113.986	660.648	7.2689	8.61662
A_15_P567922	-2.88068	-1.52641	2.88068	down	NM_200690	chr2:54247077-54247136	ranbp3b	Danio rerio zgc:66385 (zgc:66385), mRNA [NM_200690]	GO:0046907	NM_200690	Dr.77684	393663	ENSDART00000100173	RAN binding protein 3b	TC396342	65.9869	445.632	6.51459	8.041
A_15_P581872	-7.17095	-2.84217	7.17095	down	EH546044	chr11:22100112-22100053		FDR202-P00028-DEPE-F_D08 FDR202 Danio rerio cDNA clone FDR202-P00028-BR_D08 5', mRNA sequence [EH546044]		XM_005172868	Dr.156580				TC432510	16.7822	281.518	4.54253	7.3847
A_15_P595877	-2.03682	-1.02632	2.03682	down	XM_689593	chr2:5794586-5794527	LOC566321	Uncharacterized protein [Source:UniProtKB/TrEMBL;Acc:E7EYH5] [ENSDART00000115202]		XM_689593	Dr.74954	566321	ENSDART00000115202	importin-13-like	TC401543	20.8449	96.684	4.86672	5.89304
A_15_P494167	-3.40026	-1.76564	3.40026	down	NM_001145579	chr13:18558943-18559002	si:ch211-198a12.6	Danio rerio si:ch211-198a12.6 (si:ch211-198a12.6), mRNA [NM_001145579]	GO:0003676|GO:0046872	NM_001145579	Dr.75540	563253	ENSDART00000142622	si:ch211-198a12.6	TC392815	431.26	2865.92	9.05445	10.8201
A_15_P643831	-2.4146	-1.27178	2.4146	down	NM_001001944	chr20:49010592-49014524	xrn2	Danio rerio 5'-3' exoribonuclease 2 (xrn2), mRNA [NM_001001944]	GO:0005622|GO:0004534|GO:0006139|GO:0004527|GO:0008270|GO:0005634|GO:0003676	NM_001001944	Dr.10637	321940	ENSDART00000100239	5'-3' exoribonuclease 2	NP12923018	164.638	888.482	7.77696	9.04874
A_15_P225908	-2.40311	-1.2649	2.40311	down	NM_001020622	chr4:24945702-24945646	nr2c1	Danio rerio nuclear receptor subfamily 2, group C, member 1 (nr2c1), mRNA [NM_001020622]	GO:0043565|GO:0006355|GO:0003700|GO:0043401|GO:0003707|GO:0008270|GO:0005634|GO:0004879|GO:0003677|GO:0046872|GO:0006351	NM_001020622	Dr.42016	553649	ENSDART00000128968	nuclear receptor subfamily 2, group C, member 1	TC394583	24.8139	137.554	5.12099	6.38589
A_15_P739726	-2.39974	-1.26288	2.39974	down	NM_201293	chr8:25836179-25835225	ahcyl1	Danio rerio S-adenosylhomocysteine hydrolase-like 1 (ahcyl1), mRNA [NM_201293]	GO:0004013|GO:0016787|GO:0009953|GO:0006730	NM_201293	Dr.116121	798918	ENSDART00000078795	S-adenosylhomocysteine hydrolase-like 1	TC420931	115.609	631.883	7.28886	8.55174
A_15_P191100	-2.18495	-1.1276	2.18495	down	NM_199741	chr14:035150981-035151041	med7	Danio rerio mediator complex subunit 7 (med7), mRNA [NM_199741]	GO:0006355|GO:0001104|GO:0006357|GO:0016592|GO:0005634|GO:0006351	NM_199741	Dr.80623	326098	ENSDART00000015670	mediator complex subunit 7	TC449249	234.188	1106.02	8.2474	9.375
A_15_P634181	-2.18801	-1.12962	2.18801	down	NM_001030065	chr6:9412876-9412935	ilf3a	Danio rerio interleukin enhancer binding factor 3a (ilf3a), mRNA [NM_001030065]		NM_001030065	Dr.78735	324431	ENSDART00000123420	interleukin enhancer binding factor 3a	TC385847	439.479	1937.48	9.07697	10.2066
A_15_P754031	-5.38095	-2.42786	5.38095	down	NM_001089491	chr1:22039962-22039802	rfc1	Danio rerio replication factor C (activator 1) 1 (rfc1), mRNA [NM_001089491]	GO:0006260|GO:0017111|GO:0000166|GO:0003689|GO:0005663|GO:0005524|GO:0003677	NM_001089491	Dr.79216	100037336	ENSDART00000077055	replication factor C (activator 1) 1	TC417058	27.6457	352.334	5.27916	7.70702
A_15_P188781	-3.91465	-1.96888	3.91465	down	BC091950	chr8:5067517-5067458	igsf9b	immunoglobulin superfamily, member 9b [Source:ZFIN;Acc:ZDB-GENE-060810-28] [ENSDART00000004986]	GO:0008150|GO:0003674|GO:0005575	XM_681113	Dr.156103	553348	ENSDART00000004986	immunoglobulin superfamily, member 9b	TC393022	20.4723	185.733	4.83904	6.80793
A_15_P133441	-2.43012	-1.28103	2.43012	down	BC044419	chr11:37214611-37214670	sypl2a	Danio rerio, clone IMAGE:2642098, mRNA. [BC044419]	GO:0005215|GO:0016020|GO:0006810|GO:0016021|GO:0008021		Dr.20951	393640		synaptophysin-like 2a		524.919	2472.59	9.30825	10.5893
A_15_P118153	-2.8237	-1.49759	2.8237	down	XM_003200349	chr17:27867002-27867061		QKI, KH domain containing, RNA binding a [Source:ZFIN;Acc:ZDB-GENE-990415-230] [ENSDART00000125640]		XM_003200349			ENSDART00000125640		TC390517	129.286	827.611	7.44916	8.94675
A_15_P566947	-3.9692	-1.98885	3.9692	down	XM_003199029	chr7:76654052-76654111		Rep: Uncharacterized protein ENSP00000308857 - Homo sapiens (Human), partial (53%) [TC412341]		XM_003199029					TC412341	5	33.7513	2.40516	4.39401
A_15_P436750	-2.25761	-1.1748	2.25761	down	NM_200348	chr2:11751794-11751948	cdc73	Danio rerio cell division cycle 73, Paf1/RNA polymerase II complex component, homolog (S. cerevisiae) (cdc73), mRNA [NM_200348]	GO:0007507|GO:0007049|GO:0030218|GO:0016593|GO:0005634|GO:0021529|GO:0034243|GO:0051301	NM_200348	Dr.78293	393319	ENSDART00000013607	cell division cycle 73, Paf1/RNA polymerase II complex component, homolog (S. cerevisiae)	TC380784	206.198	1019.33	8.07802	9.25282
A_15_P176938	-5.0918	-2.34817	5.0918	down	NM_205752	chr17:23907994-23908053	b3gnt2b	Danio rerio UDP-GlcNAc:betaGal beta-1,3-N-acetylglucosaminyltransferase 2b (b3gnt2b), mRNA [NM_205752]	GO:0005794|GO:0016020|GO:0016757|GO:0006486|GO:0016021|GO:0008378|GO:0016740	NM_205752	Dr.140628	793362	ENSDART00000132755	UDP-GlcNAc:betaGal beta-1,3-N-acetylglucosaminyltransferase 2b	TC370305	16.1097	189.767	4.48808	6.83626
A_15_P443010	-2.53462	-1.34177	2.53462	down	NM_001098488	chr21:11397491-11398453	spna2	Danio rerio spectrin alpha 2 (spna2), mRNA [NM_001098488]	GO:0033268|GO:0045162|GO:0005509|GO:0033270	NM_001098488	Dr.43299	553383	ENSDART00000102251	spectrin alpha 2	TC374303	164.86	933.153	7.7798	9.12157
A_15_P496157	-5.65648	-2.49991	5.65648	down	NM_213262	chr2:25989238-25991426	eif5a2	Danio rerio eukaryotic translation initiation factor 5A2 (eif5a2), mRNA [NM_213262]	GO:0045905|GO:0006452|GO:0008612|GO:0003723|GO:0043022|GO:0003746|GO:0045901	NM_213262	Dr.32300	406546	ENSDART00000134077	eukaryotic translation initiation factor 5A2	NP13229150	2622.82	22424.4	11.3797	13.8797
A_15_P155651	-2.71989	-1.44355	2.71989	down	XM_005173053	chr14:369497-369438			GO:0008150|GO:0003674|GO:0030182|GO:0016021|GO:0005575|GO:0015854|GO:0001409	XM_005173053					TC386622	83.6652	527.235	6.84705	8.29059
A_15_P542002	-5.25756	-2.39439	5.25756	down	NM_001197329	chr15:4464982-4461497	eif4h	Danio rerio eukaryotic translation initiation factor 4h (eif4h), transcript variant 3, mRNA [NM_001197329]	GO:0000166|GO:0003676	NM_001197329	Dr.76638	402996	ENSDART00000108626	eukaryotic translation initiation factor 4h	TC431903	335.451	3458.31	8.71482	11.1092
A_15_P187596	-2.62723	-1.39354	2.62723	down	NM_001003875	chr3:32064255-32064403	snrnp70	Danio rerio small nuclear ribonucleoprotein 70 (U1) (snrnp70), mRNA [NM_001003875]	GO:0019013|GO:0000166|GO:0030529|GO:0060218|GO:0003676|GO:0019012	NM_001003875	Dr.35845	445398	ENSDART00000126773	small nuclear ribonucleoprotein 70 (U1)	TC446675	258.896	1449.28	8.38049	9.77403
A_15_P755771	-9.58463	-3.26072	9.58463	down	BC142880	chr23:25748757-25748698	LOC565797	Danio rerio similar to alpha-2-macroglobulin receptor, mRNA (cDNA clone IMAGE:7923309), partial cds. [BC142880]		XM_005162219	Dr.105708	565797	ENSDART00000088208	low-density lipoprotein receptor-related protein 1-like	TC373877	27.7025	628.362	5.28159	8.54231
A_15_P756606	-2.54693	-1.34876	2.54693	down	NM_205762	chr15:14603028-14606063	traf4a	Danio rerio tnf receptor-associated factor 4a (traf4a), mRNA [NM_205762]	GO:0007165|GO:0004842|GO:0016567|GO:0007250|GO:0046330|GO:0042981|GO:0008270|GO:0046872	NM_205762	Dr.81750	404045	ENSDART00000016024	tnf receptor-associated factor 4a	TC454350	67.0285	401.841	6.53626	7.88502
A_15_P531712	-2.00348	-1.00251	2.00348	down	BC088382	chr5:28512464-28512523	araf	v-raf murine sarcoma 3611 viral oncogene homolog [Source:ZFIN;Acc:ZDB-GENE-050102-2] [ENSDART00000076696]	GO:0046332|GO:0005524|GO:0046872|GO:1900108|GO:0035556|GO:0007165|GO:0016310|GO:0004672|GO:0000166|GO:0004674|GO:0016301|GO:0006468|GO:0060389|GO:0005057|GO:0016740|GO:0016772	XM_005171817	Dr.77625	403063	ENSDART00000076696	v-raf murine sarcoma 3611 viral oncogene homolog	TC370848	938.041	3322.98	10.0442	11.0467
A_15_P622961	-4.82104	-2.26935	4.82104	down	BC155552	chr9:18434826-18434885		diacylglycerol kinase, eta [Source:ZFIN;Acc:ZDB-GENE-070912-328] [ENSDART00000060356]		XM_005167979	Dr.124699		ENSDART00000060356		TC369597	5	40.9757	2.40516	4.67451
A_15_P708551	-2.01709	-1.01227	2.01709	down	NM_212656	chr6:1946124-1946455	tgm2b	Danio rerio transglutaminase 2b (tgm2b), mRNA [NM_212656]	GO:0018149|GO:0016746|GO:0003810|GO:0046872|GO:0016740	NM_212656	Dr.16524	323856	ENSDART00000148396	transglutaminase 2b	TC368363	45.4953	214.828	5.992	7.00427
A_15_P418390	-2.99525	-1.58268	2.99525	down	NM_001089492	chr7:41599698-41600371	ncapg2	Danio rerio non-SMC condensin II complex, subunit G2 (ncapg2), mRNA [NM_001089492]	GO:0008150|GO:0005634	NM_001089492	Dr.79383	100037337	ENSDART00000150776	non-SMC condensin II complex, subunit G2	TC412281	49.0059	343.211	6.08912	7.6718
A_15_P216536	-4.01147	-2.00413	4.01147	down	NM_001001889	chr19:49732533-49732474	ctnnb2	Danio rerio catenin, beta 2 (ctnnb2), mRNA [NM_001001889]	GO:0005515|GO:0005634|GO:0009953|GO:0060070	NM_001001889	Dr.29035	324004	ENSDART00000123771	catenin, beta 2	TC435428	22.6345	212.564	4.98406	6.98819
A_15_P114784	-2.31897	-1.21349	2.31897	down	NM_001076580	chr15:001646383-001630405	ppm1lb	Danio rerio protein phosphatase, Mg2+/Mn2+ dependent, 1Lb (ppm1lb), mRNA [NM_001076580]	GO:0006470|GO:0016787|GO:0004721|GO:0004722|GO:0003824|GO:0046872	NM_001076580	Dr.87269	767640	ENSDART00000127396	protein phosphatase, Mg2+/Mn2+ dependent, 1Lb	NP13225308	7.1427	36.6584	3.30348	4.51696
A_15_P726121	-2.4978	-1.32066	2.4978	down	NM_001145594	chr13:39778680-39778739	LOC566435	Danio rerio novel protein similar to H.sapiens FAM135A, family with sequence similarity 135, member A (FAM135A) (LOC566435), mRNA [NM_001145594]		NM_001145594	Dr.132867	566435	ENSDART00000083641	novel protein similar to H.sapiens FAM135A, family with sequence similarity 135, member A (FAM135A)	TC434884	35.9479	209.888	5.65038	6.97104
A_15_P394415	-2.29189	-1.19654	2.29189	down	XM_679241	chr16:1226625-1226566	rprd2b	regulation of nuclear pre-mRNA domain containing 2b [Source:ZFIN;Acc:ZDB-GENE-110719-1] [ENSDART00000112345]		XM_679241		556426	ENSDART00000112345	regulation of nuclear pre-mRNA domain containing 2b	TC432847	24.8104	130.192	5.1208	6.31733
A_15_P196291	-2.52949	-1.33884	2.52949	down	NM_001011661	chr21:22021628-22021569	guca1d	Danio rerio guanylate cyclase activator 1d (guca1d), mRNA [NM_001011661]	GO:0005509|GO:0046872|GO:0008048	NM_001011661	Dr.93054	494573	ENSDART00000065567	guanylate cyclase activator 1d	TC387041	5	21.9356	2.40516	3.74401
A_15_P507867	-2.29796	-1.20035	2.29796	down	NM_200018	chr15:28023789-28023488	blmh	Danio rerio bleomycin hydrolase (blmh), mRNA [NM_200018]	GO:0004197|GO:0016787|GO:0006508|GO:0005575	NM_200018	Dr.1479	336541	ENSDART00000152147	bleomycin hydrolase	TC406379	524.492	2337.47	9.30619	10.5065
A_15_P178131	-4.61588	-2.2066	4.61588	down	NM_001030207	chr20:34884828-34884887	emilin1a	Danio rerio elastin microfibril interfacer 1a (emilin1a), mRNA [NM_001030207]	GO:0030097|GO:0003674|GO:0005581|GO:0005576	NM_001030207	Dr.134406	566473	ENSDART00000035612	elastin microfibril interfacer 1a	TC366939	9.66229	101.676	3.76099	5.96759
A_15_P272056	-3.45678	-1.78943	3.45678	down	NM_001080003	chr21:37052347-37052406	si:ch211-208m1.2	Danio rerio si:ch211-208m1.2 (si:ch211-208m1.2), mRNA [NM_001080003]	GO:0003676|GO:0046872	NM_001080003	Dr.76806	562805	ENSDART00000142106	si:ch211-208m1.2	TC414636	15.8773	124.823	4.46896	6.25838
A_15_P153371	-2.41133	-1.26983	2.41133	down	NM_176859	chr24:8522090-8522031	tfap2a	Danio rerio transcription factor AP-2 alpha (tfap2a), mRNA [NM_176859]	GO:0006355|GO:0003700|GO:0060041|GO:0051216|GO:0005634|GO:0030318|GO:0060788|GO:0048701|GO:0014036|GO:0001501|GO:0014032|GO:0030182|GO:0007422|GO:0050935|GO:0030902	NM_176859	Dr.8506	140618	ENSDART00000082346	transcription factor AP-2 alpha	TC368272	1960.9	7544.15	11.0026	12.2724
A_15_P109712	-3.51835	-1.8149	3.51835	down	NM_001039805	chr1:9639405-9639346	tnrc5	Danio rerio trinucleotide repeat containing 5 (tnrc5), mRNA [NM_001039805]	GO:0003674|GO:0005783|GO:0045087	NM_001039805	Dr.151531	550136	ENSDART00000040116	trinucleotide repeat containing 5	TC386424	30.1477	248.933	5.39603	7.21093
A_15_P391420	-2.11771	-1.0825	2.11771	down	XM_692402	chr18:5986716-5986657		si:dkey-266m15.6 [Source:ZFIN;Acc:ZDB-GENE-070705-443] [ENSDART00000101525]		XM_692402			ENSDART00000101525		TC376997	18.8607	90.9047	4.72568	5.80819
A_15_P187261	-2.62816	-1.39405	2.62816	down	NM_001099261	chr3:24975341-24975495	slc25a17	Danio rerio solute carrier family 25 (mitochondrial carrier, peroxisomal membrane protein), member 17 (slc25a17), mRNA [NM_001099261]	GO:0016020|GO:0006810|GO:0016021|GO:0055085	NM_001099261	Dr.83064	100093708	ENSDART00000088238	solute carrier family 25 (mitochondrial carrier, peroxisomal membrane protein), member 17	TC388052	25.0432	152.014	5.13646	6.53051
A_15_P419745	-4.18053	-2.06368	4.18053	down	BC154741	chr25:3738025-3738084	prnprs3	Danio rerio prion protein, related sequence 3, mRNA (cDNA clone MGC:173527 IMAGE:7294983), complete cds. [BC154741]	GO:0005544|GO:0016020|GO:0005886|GO:0021731|GO:0005509|GO:2000310|GO:0051260|GO:0042981|GO:0007156|GO:0048854		Dr.162496	503702		prion protein, related sequence 3	TC388116	5	35.5909	2.40516	4.46885
A_15_P433985	-4.69876	-2.23228	4.69876	down	NM_001082836	chr9:23711350-23711767	itgb5	Danio rerio integrin, beta 5 (itgb5), mRNA [NM_001082836]	GO:0008305|GO:0016020|GO:0007229|GO:0007275|GO:0004872|GO:0016021|GO:0007155	NM_001082836	Dr.34301	563556	ENSDART00000131429	integrin, beta 5	TC368301	7.9548	84.507	3.47425	5.70653
A_15_P659966	-2.90116	-1.53663	2.90116	down	NM_199662	chr1:45468788-45468847	dnaja1	Danio rerio DnaJ (Hsp40) homolog, subfamily A, member 1, like (dnaja1l), mRNA [NM_199662]	GO:0009408|GO:0006457|GO:0031072|GO:0051082|GO:0005524|GO:0046872	NM_199662	Dr.78242	323922	ENSDART00000021336	DnaJ (Hsp40) homolog, subfamily A, member 1	TC415039	146.834	956.831	7.61876	9.15539
A_15_P117920	-2.26014	-1.17641	2.26014	down	NM_001003628	chr15:24096576-24096635	crk	Danio rerio v-crk sarcoma virus CT10 oncogene homolog (avian) (crk), mRNA [NM_001003628]	GO:0007520|GO:0005575	NM_001003628	Dr.30289	445234	ENSDART00000078024	v-crk sarcoma virus CT10 oncogene homolog (avian)	TC373362	713.097	2959.97	9.69873	10.8751
A_15_P155931	-5.16932	-2.36998	5.16932	down	BC078272	chr21:42361499-42361440	sh3pxd2b	Danio rerio im:7155315, mRNA (cDNA clone IMAGE:7155315), partial cds. [BC078272]	GO:0005737|GO:0007154|GO:0016175|GO:0035091	XM_005170288	Dr.2887	553242	ENSDART00000031308	SH3 and PX domains 2B	TC371178	20.3448	247.448	4.83059	7.20056
A_15_P219951	-2.54045	-1.34508	2.54045	down	NM_001128537	chr8:8045236-8045094	hcfc1b	Danio rerio host cell factor C1b (hcfc1b), mRNA [NM_001128537]		NM_001128537	Dr.104714	565206	ENSDART00000019533	host cell factor C1b	TC384466	355.56	1852.65	8.79195	10.137
A_15_P293666	-2.76023	-1.46479	2.76023	down	NM_001002335	chr3:25476289-25476230	kpna2	Danio rerio karyopherin alpha 2 (RAG cohort 1, importin alpha 1) (kpna2), mRNA [NM_001002335]	GO:0005737|GO:0008565|GO:0006810|GO:0005634|GO:0015031|GO:0006606	NM_001002335	Dr.75709	436607	ENSDART00000055490	karyopherin alpha 2 (RAG cohort 1, importin alpha 1)	TC422503	1923.9	8497.38	10.9787	12.4435
A_15_P489537	-2.77397	-1.47195	2.77397	down	NM_001013304	chr7:9181203-9181144	zgc:113413	Danio rerio zgc:113413 (zgc:113413), mRNA [NM_001013304]	GO:0003674	NM_001013304	Dr.93219	503710	ENSDART00000112599	zgc:113413	TC425655	1614.62	7236.95	10.7392	12.2111
A_15_P139261	-3.07601	-1.62106	3.07601	down	NM_213117	chr22:35355749-35355690	zgc:65870	Danio rerio zgc:65870 (zgc:65870), mRNA [NM_213117]	GO:0008150|GO:0003723|GO:0005575	NM_213117	Dr.4035	406391	ENSDART00000104693	zgc:65870	TC436179	30.34	217.97	5.40482	7.02589
A_15_P528032	-4.39373	-2.13545	4.39373	down	NM_001080563	chr1:25346459-25346518	g3bp2	Danio rerio GTPase activating protein (SH3 domain) binding protein 2 (g3bp2), mRNA [NM_001080563]	GO:0005622|GO:0000166|GO:0006810|GO:0003676	NM_001080563	Dr.6807	556409	ENSDART00000046376	GTPase activating protein (SH3 domain) binding protein 2	TC448490	270.997	2458.15	8.4449	10.5803
A_15_P755566	-2.66115	-1.41205	2.66115	down	NM_201455	chr14:37908217-37908158	cct2	Danio rerio chaperonin containing TCP1, subunit 2 (beta) (cct2), mRNA [NM_201455]	GO:0005737|GO:0000166|GO:0006457|GO:0051082|GO:0070121|GO:0044267|GO:0005524|GO:0032402	NM_201455	Dr.117647	192326		chaperonin containing TCP1, subunit 2 (beta)	TC404221	2116.92	8882.35	11.0982	12.5103
A_15_P408215	-5.40238	-2.4336	5.40238	down	NM_001039062	chr12:8854485-8852598	med24	Danio rerio mediator complex subunit 24 (med24), mRNA [NM_001039062]	GO:0006355|GO:0046549|GO:0048538|GO:0007275|GO:0005634|GO:0030154|GO:0006351|GO:0048484|GO:0007399	NM_001039062	Dr.117152	323621	ENSDART00000106375	mediator complex subunit 24	TC405408	17.7059	223.9	4.63015	7.06374
A_15_P687566	-2.05631	-1.04006	2.05631	down	CT611790	chr8:41820120-41820061	mlec	malectin [Source:ZFIN;Acc:ZDB-GENE-081105-187] [ENSDART00000083068]			Dr.121557	569613	ENSDART00000083068	malectin	TC395523	841.616	3099.87	9.90283	10.9429
A_15_P267911	-3.5788	-1.83948	3.5788	down	XR_117795	chr12:30224194-30224253		TBK1 binding protein 1 [Source:ZFIN;Acc:ZDB-GENE-100203-1] [ENSDART00000087696]		XM_005156249	Dr.70393		ENSDART00000087696		NP13322188	5	30.4363	2.40516	4.24464
A_15_P415195	-3.10544	-1.6348	3.10544	down	NM_001007309	chr5:25716770-25716829	ctdnep1a	Danio rerio CTD nuclear envelope phosphatase 1a (ctdnep1a), mRNA [NM_001007309]	GO:0031965|GO:0010867|GO:0005783|GO:0071595|GO:0005634|GO:0005635|GO:0016791|GO:0006470|GO:0016020|GO:0016787|GO:0005789|GO:0004721|GO:0006998|GO:0004722|GO:0016021	NM_001007309	Dr.78429	492343	ENSDART00000029889	CTD nuclear envelope phosphatase 1a	TC410711	75.2479	544.841	6.70309	8.33788
A_15_P164326	-3.83997	-1.9411	3.83997	down	NM_199776	chr10:18936500-18936559	ppp2r2d	Danio rerio protein phosphatase 2, regulatory subunit B, delta isoform (ppp2r2d), mRNA [NM_199776]	GO:0007165|GO:0008601|GO:0000159	NM_199776	Dr.24755	327263	ENSDART00000024127	protein phosphatase 2, regulatory subunit B, delta isoform	TC403372	1549.71	9652.37	10.684	12.6251
A_15_P107132	-2.53979	-1.34471	2.53979	down	NM_001098189	chr6:8676710-8676437	vps16	Danio rerio zgc:162584 (zgc:162584), mRNA [NM_001098189]	GO:0003674|GO:0005737|GO:0006886	NM_001098189	Dr.39353	798985	ENSDART00000083820	vacuolar protein sorting protein 16	TC366527	84.6709	500.36	6.86384	8.20855
A_15_P485745	-2.02603	-1.01865	2.02603	down	NM_131249	chr19:19185697-19185308	evx1	Danio rerio even-skipped homeobox 1 (evx1), mRNA [NM_131249]	GO:0043565|GO:0006355|GO:0003700|GO:0005634|GO:0003677|GO:0033334	NM_131249	Dr.8101	30499	ENSDART00000052636	even-skipped homeobox 1	TC385307	16.0165	72.4933	4.48072	5.49937
A_15_P102615	-2.59375	-1.37504	2.59375	down	NM_001077780	chr21:22082083-22080867	rb1	Danio rerio retinoblastoma 1 (rb1), mRNA [NM_001077780]	GO:0031290|GO:0021554|GO:0051726|GO:0005634|GO:0007601	NM_001077780	Dr.42121	777733	ENSDART00000024309	retinoblastoma 1	TC366259	481.236	2428.54	9.18852	10.5636
A_15_P627301	-2.24731	-1.1682	2.24731	down	NM_001007446	chr23:18971212-18971153	nsfl1c	Danio rerio NSFL1 (p97) cofactor (p47) (nsfl1c), mRNA [NM_001007446]	GO:0008150	NM_001007446	Dr.5439	492805	ENSDART00000019111	NSFL1 (p97) cofactor (p47)	TC382242	1870.43	6763.13	10.9373	12.1055
A_15_P300776	-2.10196	-1.07173	2.10196	down	CT687993	chr16:35323699-35323548	snap91	synaptosomal-associated protein 91 [Source:ZFIN;Acc:ZDB-GENE-100422-6] [ENSDART00000041035]	GO:0005545|GO:0005543|GO:0030276|GO:0048268|GO:0030118	XM_688661	Dr.153144	565384	ENSDART00000041035	synaptosomal-associated protein 91	TC407655	35.7467	173.097	5.64148	6.71321
A_15_P206141	-5.09785	-2.34989	5.09785	down	NM_001017886	chr14:51378648-51378589	ppp2ca	Danio rerio protein phosphatase 2 (formerly 2A), catalytic subunit, alpha isoform (ppp2ca), mRNA [NM_001017886]	GO:0016787|GO:0004721	NM_001017886	Dr.118073	550585	ENSDART00000042421	protein phosphatase 2 (formerly 2A), catalytic subunit, alpha isoform	TC370928	39.4496	475.395	5.78774	8.13763
A_15_P116325	-2.50704	-1.32599	2.50704	down	NM_001004012	chr18:18411705-18411764	st3gal2	Danio rerio ST3 beta-galactoside alpha-2,3-sialyltransferase 2 (st3gal2), mRNA [NM_001004012]	GO:0030173|GO:0008373|GO:0005794|GO:0016020|GO:0016757|GO:0006486|GO:0016021|GO:0003836|GO:0016740	NM_001004012	Dr.34022	445562	ENSDART00000060483	ST3 beta-galactoside alpha-2,3-sialyltransferase 2	TC376050	35.0866	204.964	5.61335	6.93934
A_15_P272181	-2.63713	-1.39897	2.63713	down	NM_001089356	chr9:35229436-35229377	me3	Danio rerio malic enzyme 3, NADP(+)-dependent, mitochondrial (me3), mRNA [NM_001089356]	GO:0051287|GO:0004470|GO:0016491|GO:0006108|GO:0004471|GO:0005575|GO:0046872|GO:0055114|GO:0016616	NM_001089356	Dr.80696	492719	ENSDART00000012385	malic enzyme 3, NADP(+)-dependent, mitochondrial	TC367398	135.461	808.914	7.5166	8.91557
A_15_P750526	-2.23282	-1.15886	2.23282	down	NM_001126463	chr9:47872400-47872341	igfbp5a	Danio rerio insulin-like growth factor binding protein 5a (igfbp5a), mRNA [NM_001126463]	GO:0005576|GO:0001558|GO:0005520	NM_001126463	Dr.24976	403039	ENSDART00000054137	insulin-like growth factor binding protein 5a	TC416144	41.437	217.096	5.86065	7.01951
A_15_P121132	-3.14045	-1.65097	3.14045	down	NM_131031	chr1:7728690-7727663	actb1	Danio rerio actin, beta 1 (actb1), mRNA [NM_131031]	GO:0005737|GO:0000166|GO:0005856|GO:0005524	NM_131031	Dr.35143	57934	ENSDART00000135318	actin, beta 1	TC449752	5995.99	26954	12.4999	14.1508
A_15_P541057	-2.21015	-1.14414	2.21015	down	NM_200653	chr14:10933097-10934259	atrx	Danio rerio alpha thalassemia/mental retardation syndrome X-linked homolog (human) (atrx), mRNA [NM_200653]	GO:0004386|GO:0008270|GO:0003676|GO:0005524|GO:0003677	NM_200653	Dr.5568	323299	ENSDART00000125865	alpha thalassemia/mental retardation syndrome X-linked homolog (human)	TC366766	1041.56	3998.89	10.182	11.3262
A_15_P581922	-2.86458	-1.51833	2.86458	down	BC133166	chr7:25721752-25722396	si:dkeyp-75h12.2	testis-specific kinase 1 [Source:HGNC Symbol;Acc:11731] [ENSDART00000110301]	GO:0016310|GO:0004672|GO:0000166|GO:0016301|GO:0006468|GO:0004713|GO:0005524|GO:0016740|GO:0016772	XM_682787	Dr.80937	559449	ENSDART00000110301	si:dkeyp-75h12.2	TC389220	7.2863	46.4368	3.33364	4.85197
A_15_P659776	-2.94255	-1.55707	2.94255	down	NM_198358	chr22:6959782-6959723	smarcd1	Danio rerio SWI/SNF related, matrix associated, actin dependent regulator of chromatin, subfamily d, member 1 (smarcd1), mRNA [NM_198358]		NM_198358	Dr.100883	323115	ENSDART00000003422	SWI/SNF related, matrix associated, actin dependent regulator of chromatin, subfamily d, member 1	TC380826	1858.77	8742.44	10.9281	12.4852
A_15_P192531	-2.31297	-1.20975	2.31297	down	NM_131057	chr10:6565994-6566053	vasa	Danio rerio vasa homolog (vasa), mRNA [NM_131057]	GO:0008406|GO:0008026|GO:0016787|GO:0000166|GO:0004386|GO:0043186|GO:0003676|GO:0005524	NM_131057	Dr.559	30263	ENSDART00000121729	vasa homolog	TC401193	35.1886	188.153	5.61636	6.8261
A_15_P135361	-3.04068	-1.60439	3.04068	down				Rep: Sarcalumenin precursor. - Takifugu rubripes, partial (86%) [TC381913]	GO:0008150|GO:0003674|GO:0005509|GO:0005575						TC381913	200.315	1325.16	8.04166	9.64606
A_15_P666741	-2.99025	-1.58027	2.99025	down	NM_001145789	chr1:37154809-37154868	dclk2	Danio rerio doublecortin-like kinase 2 (dclk2), transcript variant 4, mRNA [NM_001145789]	GO:0005524|GO:0008021|GO:0035556|GO:0016310|GO:0005737|GO:0046777|GO:0004672|GO:0000166|GO:0004674|GO:0016301|GO:0015630|GO:0006468|GO:0016740|GO:0016772	NM_001145789	Dr.85306	572548	ENSDART00000043855	doublecortin-like kinase 2	NP9502009	73.8305	514.903	6.67121	8.25148
A_15_P727311	-3.09355	-1.62926	3.09355	down	NM_001082846	chr19:31708470-31708529	si:ch211-215a10.4	Danio rerio si:ch211-215a10.4 (si:ch211-215a10.4), mRNA [NM_001082846]		NM_001082846	Dr.17818	565228	ENSDART00000073704	si:ch211-215a10.4	TC371394	32.7673	237.939	5.51831	7.14757
A_15_P470205	-3.35194	-1.74499	3.35194	down	NM_001014295	chr11:23200478-23200420	tmem183a	Danio rerio transmembrane protein 183A (tmem183a), mRNA [NM_001014295]	GO:0008150|GO:0003674|GO:0005575	NM_001014295	Dr.78611	541482		transmembrane protein 183A	TC370115	91.6513	702.944	6.96757	8.71256
A_15_P638721	-2.00792	-1.0057	2.00792	down	NM_131594	chr23:29955759-29955700	ctnnbip1	Danio rerio catenin, beta interacting protein 1 (ctnnbip1), mRNA [NM_131594]	GO:0001658|GO:0008013|GO:0030178|GO:0005634|GO:0009952|GO:0005829	NM_131594	Dr.120421	58117	ENSDART00000103841	catenin, beta interacting protein 1	TC379779	702.674	2634.94	9.68102	10.6867
A_15_P435500	-3.17278	-1.66575	3.17278	down	NM_001013520	chr2:28253461-28250237	cdh6	Danio rerio cadherin 6 (cdh6), mRNA [NM_001013520]	GO:0016020|GO:0005886|GO:0060042|GO:0048793|GO:0005509|GO:0016021|GO:0007155|GO:0007156	NM_001013520	Dr.132516	541393	ENSDART00000013638	cadherin 6	TC430042	29.1114	216.292	5.34849	7.01424
A_15_P534902	-2.10472	-1.07363	2.10472	down	NM_200129	chr16:47508774-47508715	dcaf13	Danio rerio ddb1 and cul4 associated factor 13 (dcaf13), mRNA [NM_200129]	GO:0003674|GO:0016567|GO:0042254|GO:0030529|GO:0006364|GO:0005730|GO:0005634|GO:0080008	NM_200129	Dr.79195	393097	ENSDART00000148355	ddb1 and cul4 associated factor 13	TC392280	577.968	2336.87	9.43209	10.5057
A_15_P345850	-2.74605	-1.45736	2.74605	down	NM_001194978	chr15:16338378-16338437	cltcb	Danio rerio clathrin, heavy polypeptide b (Hc) (cltcb), mRNA [NM_001194978]	GO:0030132|GO:0005198|GO:0030130|GO:0016192|GO:0006886	NM_001194978	Dr.38748	503600	ENSDART00000123172	clathrin, heavy polypeptide b (Hc)	TC381561	240.841	1422.08	8.29014	9.7475
A_15_P450915	-2.01573	-1.0113	2.01573	down	NM_001077722	chr7:66335541-66338904	tpcn2	Danio rerio two pore segment channel 2 (tpcn2), mRNA [NM_001077722]	GO:0005262|GO:0005244|GO:0005245|GO:0005765|GO:0055085|GO:0005764|GO:0006939|GO:0072345|GO:0016020|GO:0070588|GO:0006810|GO:0006816|GO:0034765|GO:0016021|GO:0005216|GO:0006811	NM_001077722	Dr.133033	777614		two pore segment channel 2	TC366356	29.3337	135.83	5.35985	6.37116
A_15_P109921	-2.69381	-1.42965	2.69381	down	NM_199779	chr24:17884055-17884114	pdia4	Danio rerio protein disulfide isomerase associated 4 (pdia4), mRNA [NM_199779]	GO:0005783|GO:0006662|GO:0015035|GO:0009055|GO:0005788|GO:0003756|GO:0045454|GO:0016853	NM_199779	Dr.77341	554998	ENSDART00000126435	protein disulfide isomerase associated 4	TC390061	414.956	2228.82	8.99891	10.4286
A_15_P542802	-2.44403	-1.28926	2.44403	down	NM_213338	chr3:61536584-61536643	aimp2	Danio rerio aminoacyl tRNA synthetase complex-interacting multifunctional protein 2 (aimp2), mRNA [NM_213338]	GO:0008150|GO:0003674|GO:0005575	NM_213338	Dr.77889	406647	ENSDART00000009194	aminoacyl tRNA synthetase complex-interacting multifunctional protein 2	TC402743	236.786	1247.35	8.2682	9.55746
A_15_P147441	-3.30934	-1.72654	3.30934	down	CT732083	chr5:60319367-60319308		melanoma cell adhesion molecule [Source:HGNC Symbol;Acc:6934] [ENSDART00000074232]		XM_005172015	Dr.42477		ENSDART00000074232		TC416309	13.2828	99.2233	4.20298	5.92952
A_15_P117215	-2.69072	-1.42799	2.69072	down	NM_153644	chr5:14853259-14855132	h2afva	Danio rerio H2A histone family, member Va (h2afva), mRNA [NM_153644]	GO:0046982|GO:0005694|GO:0006334|GO:0005634|GO:0000786|GO:0003677	NM_153644	Dr.79682	252913	ENSDART00000099660	H2A histone family, member Va	TC389794	2402.37	10127.4	11.2625	12.6905
A_15_P187056	-3.43061	-1.77846	3.43061	down	BC152296	chr3:15901649-15901708	st8sia6	Danio rerio ST8 alpha-N-acetyl-neuraminide alpha-2,8-sialyltransferase 6, mRNA (cDNA clone IMAGE:7159684), partial cds. [BC152296]	GO:0003828|GO:0030173|GO:0008373|GO:0005794|GO:0016020|GO:0016757|GO:0006486|GO:0016021|GO:0016740	XM_678306	Dr.155500	553212	ENSDART00000122519	ST8 alpha-N-acetyl-neuraminide alpha-2,8-sialyltransferase 6	TC427702	25.3136	203.224	5.14996	6.92842
A_15_P415315	-4.14426	-2.05111	4.14426	down	NM_200925	chr24:12930233-12930600	stau2	Danio rerio staufen, RNA binding protein, homolog 2 (Drosophila) (stau2), mRNA [NM_200925]	GO:0008354|GO:0003723|GO:0005874|GO:0006810|GO:0007281	NM_200925	Dr.75888	393899	ENSDART00000139246	staufen, RNA binding protein, homolog 2 (Drosophila)	TC405075	148.313	1358.4	7.63152	9.68264
A_15_P169441	-3.0498	-1.60871	3.0498	down	NM_152971	chr16:32826911-32826852	lmna	Danio rerio lamin A (lmna), mRNA [NM_152971]	GO:0005882|GO:0060047|GO:0005198|GO:0090342	NM_152971	Dr.10311	195815	ENSDART00000024919	lamin A	TC369441	54.1351	389.334	6.22965	7.83837
A_15_P176606	-2.75783	-1.46354	2.75783	down	NM_001045412	chr13:21778808-21778749	tspan14	Danio rerio tetraspanin 14 (tspan14), mRNA [NM_001045412]	GO:0008150|GO:0003674|GO:0016020|GO:0016021	NM_001045412	Dr.79622	751700	ENSDART00000078352	tetraspanin 14	TC412663	458.563	2479.66	9.1294	10.5929
A_15_P260083	-4.07723	-2.02759	4.07723	down		chr12:9851666-9851607		a disintegrin and metalloproteinase domain 8b [Source:ZFIN;Acc:ZDB-GENE-070808-1] [ENSDART00000066471]					ENSDART00000066471		TC390878	5	34.6685	2.40516	4.43275
A_15_P460160	-3.80909	-1.92945	3.80909	down	NM_001128075	chr25:6032126-6032067	appl2	Danio rerio adaptor protein, phosphotyrosine interaction, PH domain and leucine zipper containing 2 (appl2), mRNA [NM_001128075]	GO:0005515|GO:0005543|GO:0005768	NM_001128075	Dr.120704	100000135	ENSDART00000112853	adaptor protein, phosphotyrosine interaction, PH domain and leucine zipper containing 2	TC369613	7.66196	64.866	3.41211	5.34155
A_15_P591947	-5.43091	-2.44119	5.43091	down	EE710814	chr19:44788202-44788261	wu:fc50e08	AGENCOURT_90089939 NIH_ZGC_29 Danio rerio cDNA clone IMAGE:8805391 5', mRNA sequence [EE710814]			Dr.105965	324988		wu:fc50e08	TC395642	28.3365	364.208	5.31117	7.75236
A_15_P100548	-2.41189	-1.27017	2.41189	down	NM_201176	chr9:2335719-2335778	atp5g3a	Danio rerio ATP synthase, H+ transporting, mitochondrial Fo complex, subunit C3 (subunit 9), genome duplicate a (atp5g3a), mRNA [NM_201176]	GO:0033177|GO:0015986|GO:0016020|GO:0015078|GO:0015991|GO:0006810|GO:0016021|GO:0045263|GO:0015992|GO:0008289|GO:0006811	NM_201176	Dr.29150	394151	ENSDART00000130645	ATP synthase, H+ transporting, mitochondrial Fo complex, subunit C3 (subunit 9), genome duplicate a	TC391732	9332.89	31308.6	13.1013	14.3715
A_15_P766766	-2.54226	-1.34611	2.54226	down	NM_001044914	chr12:35429709-35429889	trim8	Danio rerio tripartite motif-containing 8 (trim8), mRNA [NM_001044914]	GO:0008270|GO:0005634|GO:0046872	NM_001044914	Dr.73064	559967	ENSDART00000085888	tripartite motif-containing 8	TC365888	73.7165	438.432	6.66813	8.01424
A_15_P587617	-5.15032	-2.36466	5.15032	down	NM_001115052	chr9:20223056-20223115	si:dkey-281i8.1	Danio rerio si:dkey-281i8.1 (si:dkey-281i8.1), mRNA [NM_001115052]	GO:0016020|GO:0016021	NM_001115052	Dr.74758	562856	ENSDART00000102196	si:dkey-281i8.1	TC434916	18.4979	223.141	4.69464	7.0593
A_15_P130712	-2.3226	-1.21574	2.3226	down	NM_131250	chr17:24149624-24149683	otx1b	Danio rerio orthodenticle homolog 1b (otx1b), mRNA [NM_131250]	GO:0043565|GO:0003406|GO:0006355|GO:0042472|GO:0003700|GO:0007275|GO:0005634|GO:0003677	NM_131250	Dr.30626	30500	ENSDART00000064067	orthodenticle homolog 1b	NP13228863	140.819	736.6	7.56274	8.77848
A_15_P283608	-2.05691	-1.04048	2.05691	down	BC155552	chr9:18434824-18434883		diacylglycerol kinase, eta [Source:ZFIN;Acc:ZDB-GENE-070912-328] [ENSDART00000060356]		XM_005167979	Dr.124699		ENSDART00000060356		TC369597	15.1875	69.341	4.39998	5.44045
A_15_P136766	-2.31301	-1.20977	2.31301	down	NM_001045280	chr25:22891450-22891391	pkp3a	Danio rerio plakophilin 3 (pkp3), mRNA [NM_001045280]	GO:0008150|GO:0005575	NM_001045280	Dr.93281	368397	ENSDART00000123211	plakophilin 3a	TC423925	313.326	1521.61	8.63153	9.84131
A_15_P159826	-2.05806	-1.04129	2.05806	down	BC090535	chr4:61443344-61443403	LOC100005002	Danio rerio cDNA clone IMAGE:7145975, partial cds. [BC090535]		XM_005166251	Dr.93134	100005002		uncharacterized LOC100005002	TC422382	37.41	179.017	5.71488	6.75617
A_15_P398455	-2.40407	-1.26548	2.40407	down	NM_212991	chr5:56998700-56997800	hnrpkl	Danio rerio heterogeneous nuclear ribonucleoprotein K, like (hnrpkl), mRNA [NM_212991]	GO:0008150|GO:0019013|GO:0030529|GO:0003723|GO:0019012	NM_212991	Dr.47275	406264	ENSDART00000005671	heterogeneous nuclear ribonucleoprotein K, like	TC386379	224.859	1165.37	8.1919	9.45738
A_15_P658686	-5.12917	-2.35873	5.12917	down	BC163418	chr7:21950986-21950927	prkri	Danio rerio protein-kinase, interferon-inducible double stranded RNA dependent inhibitor, mRNA (cDNA clone MGC:194874 IMAGE:9038586), complete cds. [BC163418]	GO:0016310|GO:0016301|GO:0016740		Dr.10669	58154		protein-kinase, interferon-inducible double stranded RNA dependent inhibitor		17.8367	214.115	4.6412	6.99992
A_15_P117696	-2.16853	-1.11672	2.16853	down	NM_001003570	chr19:32121874-32122019	mfsd2ab	Danio rerio major facilitator superfamily domain containing 2ab (mfsd2ab), mRNA [NM_001003570]	GO:0016020|GO:0006810|GO:0016021	NM_001003570	Dr.3619	445176	ENSDART00000047461	major facilitator superfamily domain containing 2ab	TC418295	164.311	793.616	7.77297	8.88969
A_15_P480564	-3.33771	-1.73886	3.33771	down	XM_002662315	chr6:16662320-16656857	nomo	nodal modulator [Source:ZFIN;Acc:ZDB-GENE-040826-3] [ENSDART00000112867]	GO:0005789|GO:1900176|GO:0030246|GO:0009966	XM_002662315		446115	ENSDART00000112867	nodal modulator	TC372474	1166.97	6578.09	10.3277	12.0666
A_15_P722511	-9.44545	-3.23962	9.44545	down	EH449538	chr16:27937236-27937177		FDR103-P00050-DEPE-F_E24 FDR103 Danio rerio cDNA clone FDR103-P00050-BR_E24 5', mRNA sequence [EH449538]		XM_001340824	Dr.162104				TC408061	65.4651	1417.87	6.50229	9.7419
A_15_P613272	-3.20466	-1.68017	3.20466	down	XR_223011	chr23:31261923-31261982				XR_223011					TC407119	127.409	923.766	7.42652	9.10669
A_15_P308366	-2.19289	-1.13283	2.19289	down	CA473837	chr12:6362023-6362082	tbc1d12b	TBC1 domain family, member 12b [Source:ZFIN;Acc:ZDB-GENE-121214-108] [ENSDART00000109305]		XM_002663912	Dr.88412	100332088	ENSDART00000109305	TBC1 domain family, member 12b	TC406527	18.4346	91.7543	4.68814	5.82097
A_15_P224931	-3.33579	-1.73803	3.33579	down	NM_213168	chr23:3767150-3767091	hmga1a	Danio rerio high mobility group AT-hook 1a (hmga1a), mRNA [NM_213168]	GO:0006355|GO:0005634|GO:0003677|GO:0000785	NM_213168	Dr.75367	406447	ENSDART00000131536	high mobility group AT-hook 1a	TC439364	24489.9	105531	14.5609	16.299
A_15_P192341	-3.8936	-1.96111	3.8936	down	NM_001045119	chr20:28300368-28300309	ino80	Danio rerio INO80 homolog (S. cerevisiae) (ino80), mRNA [NM_001045119]	GO:0016817|GO:0016787|GO:0000166|GO:0004386|GO:0003676|GO:0005524|GO:0003677	NM_001045119	Dr.84310	566768	ENSDART00000103336	INO80 homolog (S. cerevisiae)	NP1364585	79.0639	713.102	6.77024	8.73134
A_15_P496427	-2.17375	-1.12019	2.17375	down	NM_001007055	chr14:31848443-31848384	rap2c	Danio rerio RAP2C, member of RAS oncogene family (rap2c), mRNA [NM_001007055]	GO:0006184|GO:0007165|GO:0016020|GO:0000166|GO:0007264|GO:0003924|GO:0005525	NM_001007055	Dr.37662	474323	ENSDART00000014095	RAP2C, member of RAS oncogene family	NP13229175	2560.43	8678.63	11.3508	12.471
A_15_P134906	-2.85745	-1.51473	2.85745	down	NM_200958	chr22:22527398-22527340	cdc34a	Danio rerio cell division cycle 34 homolog (S. cerevisiae) a (cdc34a), mRNA [NM_200958]	GO:0016881|GO:0016874|GO:0005575	NM_200958	Dr.13707	393933	ENSDART00000131129	cell division cycle 34 homolog (S. cerevisiae) a	TC414252	60.7755	407.969	6.39188	7.90661
A_15_P218661	-2.49378	-1.31834	2.49378	down	NM_131856	chr22:16044719-16045192	klf2a	Danio rerio Kruppel-like factor 2a (klf2a), mRNA [NM_131856]	GO:0044212|GO:0003171|GO:0061444|GO:0003676|GO:0046872|GO:0006809	NM_131856	Dr.29173	117508	ENSDART00000062587	Kruppel-like factor 2a	TC397026	26.4886	152.881	5.21866	6.537
A_15_P735006	-2.9342	-1.55297	2.9342	down	NM_001139479	chr15:20086134-20085974	a2ml	Danio rerio alpha-2-macroglobulin-like (a2ml), mRNA [NM_001139479]	GO:0001889|GO:0004866|GO:0005576|GO:0005615	NM_001139479	Dr.75455	100006972	ENSDART00000078734	alpha-2-macroglobulin-like	TC387182	179.787	1162.35	7.90123	9.4542
A_15_P237011	-2.59611	-1.37635	2.59611	down	NM_213485	chr4:12488556-12488883	cand1	Danio rerio cullin-associated and neddylation-dissociated 1 (cand1), mRNA [NM_213485]		NM_213485	Dr.76535	406806	ENSDART00000003694	cullin-associated and neddylation-dissociated 1	TC365643	1593.48	6726.66	10.7207	12.097
A_15_P658806	-8.6165	-3.1071	8.6165	down	BC163952	chr14:15420476-15420417	selt2	Danio rerio cDNA clone MGC:191127 IMAGE:100059436, complete cds. [BC163952]	GO:0008430|GO:0045454		Dr.78130	352917		selenoprotein T, 2	NP13228398	320.479	5358.51	8.65699	11.7641
A_15_P431950	-2.22701	-1.15511	2.22701	down	NM_001123258	chr8:31163879-31163820	zgc:162939	Danio rerio zgc:162939 (zgc:162939), mRNA [NM_001123258]	GO:0019370|GO:0006508|GO:0008270|GO:0005575|GO:0008237	NM_001123258	Dr.76259	560737	ENSDART00000111358	zgc:162939	TC368659	19.8084	100.491	4.79292	5.94802
A_15_P103574	-5.73575	-2.51998	5.73575	down	BC163027	chr19:47811919-47811860	rbm24a	Danio rerio RNA binding motif protein 24, mRNA (cDNA clone MGC:194503 IMAGE:9037307), complete cds. [BC163027]	GO:0001947|GO:0043488|GO:0005737|GO:0000166|GO:0003723|GO:0003228|GO:0010830|GO:0005634|GO:0003730|GO:0072358|GO:0003676|GO:0030154	XR_222595	Dr.159425	405801		RNA binding motif protein 24a	TC395838	58.5811	780.572	6.3439	8.86389
A_15_P156946	-2.53772	-1.34353	2.53772	down	NM_001128703	chr21:7525142-7525201	otpa	Danio rerio orthopedia homolog a (otpa), mRNA [NM_001128703]	GO:0043565|GO:0006355|GO:0000976|GO:0003700|GO:0007632|GO:0005634|GO:0021884|GO:0003677	NM_001128703	Dr.87162	560759	ENSDART00000027268	orthopedia homolog a	TC382124	71.5176	425.975	6.6266	7.97014
A_15_P495057	-2.21416	-1.14676	2.21416	down	NM_201484	chr17:32730084-32730143	ywhaqb	Danio rerio tyrosine 3-monooxygenase/tryptophan 5-monooxygenase activation protein, theta polypeptide b (ywhaqb), mRNA [NM_201484]	GO:0004497|GO:0019904|GO:0016491|GO:0055114	NM_201484	Dr.1068	335195	ENSDART00000018423	tyrosine 3-monooxygenase/tryptophan 5-monooxygenase activation protein, theta polypeptide b	TC388924	3717.78	12435.8	11.8478	12.9946
A_15_P623351	-2.26066	-1.17674	2.26066	down	NM_200569	chr14:29048806-29048747	tsc22d3	Danio rerio TSC22 domain family, member 3 (tsc22d3), mRNA [NM_200569]	GO:0006355|GO:0003700|GO:0005575	NM_200569	Dr.12437	393541	ENSDART00000054115	TSC22 domain family, member 3	TC419502	1904.59	6899.76	10.9621	12.1388
A_15_P503888	-3.96017	-1.98556	3.96017	down	XM_002665215	chr17:32928612-32928553	cenpf	centromere protein F, (mitosin) [Source:ZFIN;Acc:ZDB-GENE-041111-205] [ENSDART00000135517]	GO:0008150|GO:0045502|GO:0005575|GO:0042803|GO:0008134	XM_002665215		497403	ENSDART00000135517	centromere protein F, (mitosin)	TC382539	403.158	3106.68	8.96051	10.9461
A_15_P132516	-2.6336	-1.39703	2.6336	down	NM_201192	chr9:230640-230699	pcbp2	Danio rerio poly(rC) binding protein 2 (pcbp2), mRNA [NM_201192]	GO:0008150|GO:0003723|GO:0005575	NM_201192	Dr.76907	321844	ENSDART00000025885	poly(rC) binding protein 2	TC384770	4770.86	18503.1	12.1854	13.5825
A_15_P567643	-2.07913	-1.05598	2.07913	down	XM_005163327	chr2:14610167-14619222		GB		XM_005163327					NP13323377	22.8662	107.714	4.99984	6.05581
A_15_P100910	-2.41969	-1.27482	2.41969	down	NM_200085	chr8:27776619-27776560	slc16a1	Danio rerio solute carrier family 16 (monocarboxylic acid transporters), member 1 (slc16a1), mRNA [NM_200085]	GO:0015711|GO:0015355|GO:0016021|GO:0055085	NM_200085	Dr.82478	368274	ENSDART00000099214	solute carrier family 16 (monocarboxylic acid transporters), member 1	TC369440	58.3467	330.067	6.33721	7.61203
A_15_P363625	-2.08552	-1.06041	2.08552	down	NM_177984	chr5:34561438-34561497	lmo4a	Danio rerio LIM domain only 4a (lmo4a), mRNA [NM_177984]	GO:0031076|GO:0008270|GO:0030900|GO:0005575|GO:0046872	NM_177984	Dr.107376	114412	ENSDART00000085219	LIM domain only 4a	NP13225405	423.973	1792.61	9.02914	10.0895
A_15_P733676	-7.49383	-2.9057	7.49383	down	NM_200572	chr19:49783863-49783804	psmd3	Danio rerio proteasome (prosome, macropain) 26S subunit, non-ATPase, 3 (psmd3), mRNA [NM_200572]	GO:0000502|GO:0042176|GO:0030234	NM_200572	Dr.13797	393544	ENSDART00000027158	proteasome (prosome, macropain) 26S subunit, non-ATPase, 3	TC409433	58.0843	1007.37	6.32964	9.23534
A_15_P507057	-2.04862	-1.03465	2.04862	down	NM_213532	chr8:32231862-32230062	creb3l3l	Danio rerio cAMP responsive element binding protein 3-like 3 like (creb3l3l), mRNA [NM_213532]	GO:0043565|GO:0006355|GO:0003700|GO:0003677	NM_213532	Dr.79921	406853	ENSDART00000024872	cAMP responsive element binding protein 3-like 3 like	TC418939	51.1809	245.722	6.15683	7.19148
A_15_P739766	-2.27993	-1.18899	2.27993	down	NM_201153	chr18:47362741-47361522	rps3	Danio rerio ribosomal protein S3 (rps3), mRNA [NM_201153]	GO:0005622|GO:0003735|GO:0030529|GO:0003723|GO:0015935|GO:0005840|GO:0009790|GO:0006412	NM_201153	Dr.65656	336550	ENSDART00000067803	ribosomal protein S3	NP13226146	27808.1	85323	14.7316	15.9206
A_15_P472610	-5.16687	-2.36929	5.16687	down	NM_201485	chr19:21190862-21190921	rab5aa	Danio rerio RAB5A, member RAS oncogene family, a (rab5aa), mRNA [NM_201485]	GO:0000166|GO:0007264|GO:0015031|GO:0005525	NM_201485	Dr.7401	337737	ENSDART00000142127	RAB5A, member RAS oncogene family, a	TC413607	43.2151	527.149	5.92085	8.29014
A_15_P111547	-2.04826	-1.0344	2.04826	down	NM_131441	chr21:5025207-5025148	notch1a	Danio rerio notch homolog 1a (notch1a), mRNA [NM_131441]	GO:0007368|GO:0021986|GO:0001756|GO:0021531|GO:0048699|GO:0042663|GO:0009952|GO:0030154|GO:0007219|GO:0004872|GO:0048259|GO:0048337|GO:0006355|GO:0021523|GO:0005509|GO:0007275|GO:0001840|GO:0006351|GO:0007399|GO:0016020|GO:0031016|GO:0031017|GO:0050793|GO:0055016|GO:0016021|GO:0048936	NM_131441	Dr.75753	30718	ENSDART00000046633	notch homolog 1a	TC373902	2434.59	7784.86	11.2816	12.316
A_15_P749281	-6.66534	-2.73668	6.66534	down	NM_201466	chr2:9936105-9936164	pfn2l	Danio rerio profilin 2 like (pfn2l), mRNA [NM_201466]	GO:0030036|GO:0003779	NM_201466	Dr.75574	321383	ENSDART00000053426	profilin 2 like	TC439136	807.367	9413.48	9.85394	12.5906
A_15_P632034	-2.00378	-1.00273	2.00378	down	NM_001113579	chr8:24545384-24545325	si:ch73-237c6.1	Danio rerio complement factor properdin (LOC100149189), mRNA [NM_001113579]		NM_001113579	Dr.22056	100149189	ENSDART00000099791	si:ch73-237c6.1	TC425541	52.149	244.194	6.18051	7.18324
A_15_P241926	-2.96095	-1.56606	2.96095	down	NM_001130598	chr20:33996665-33996606	sele	Danio rerio selectin E (sele), mRNA [NM_001130598]	GO:0016020|GO:0030246|GO:0007155	NM_001130598	Dr.119576	558139	ENSDART00000111022	selectin E	TC365668	5	25.3941	2.40516	3.97122
A_15_P753511	-2.34075	-1.22697	2.34075	down	XM_002667001	chr25:6017081-6017140		tubulin, gamma complex associated protein 6 [Source:HGNC Symbol;Acc:18127] [ENSDART00000122952]		XM_002667001			ENSDART00000122952		TC421782	209.339	1070.75	8.09911	9.32608
A_15_P293401	-3.82169	-1.93421	3.82169	down	NM_001077723	chr17:43629226-43629167	zfyve28	Danio rerio zinc finger, FYVE domain containing 28 (zfyve28), mRNA [NM_001077723]	GO:0005737|GO:0016020|GO:0031901|GO:0007175|GO:0032266|GO:0046872|GO:0005829|GO:0005768	NM_001077723	Dr.82459	777615	ENSDART00000085124	zinc finger, FYVE domain containing 28	TC366588	16.9725	148.154	4.55993	6.49414
A_15_P104671	-2.36223	-1.24015	2.36223	down	BC142597	chr5:48104658-48104599	hapln1a	hyaluronan and proteoglycan link protein 1a [Source:ZFIN;Acc:ZDB-GENE-050302-175] [ENSDART00000122966]	GO:0005540|GO:0007155	XM_005165241	Dr.78848	493635	ENSDART00000122966	hyaluronan and proteoglycan link protein 1a	TC403061	402.265	1928.14	8.95706	10.1972
A_15_P133296	-2.68955	-1.42737	2.68955	down	NM_213137	chr8:14691155-14691096	rhoaa	Danio rerio ras homolog gene family, member Aa (rhoaa), mRNA [NM_213137]	GO:0005622|GO:0016020|GO:0000166|GO:0007264|GO:0005525	NM_213137	Dr.32765	406411	ENSDART00000126432	ras homolog gene family, member Aa	TC392831	896.812	4222.7	9.9818	11.4092
A_15_P114779	-2.09505	-1.06699	2.09505	down	NM_001012263	chr14:43137920-43137861	fgfrl1b	Danio rerio fibroblast growth factor receptor-like 1b (fgfrl1b), mRNA [NM_001012263]	GO:0005515|GO:0051216|GO:0016021	NM_001012263	Dr.37960	497135	ENSDART00000074428	fibroblast growth factor receptor-like 1b	TC366438	25.97	124.616	5.18917	6.25616
A_15_P657116	-3.9035	-1.96477	3.9035	down	NM_131057	chr10:6564453-6564623	vasa	Danio rerio vasa homolog (vasa), mRNA [NM_131057]	GO:0008406|GO:0008026|GO:0016787|GO:0000166|GO:0004386|GO:0043186|GO:0003676|GO:0005524	NM_131057	Dr.559	30263	ENSDART00000121729	vasa homolog	TC371155	18.5023	166.472	4.69557	6.66034
A_15_P539967	-2.41397	-1.27141	2.41397	down	NM_001114429	chr11:19238656-19238597	zgc:175264	Danio rerio zgc:175264 (zgc:175264), mRNA [NM_001114429]	GO:0008150|GO:0003674|GO:0005575	NM_001114429	Dr.84071	564764	ENSDART00000124369	zgc:175264	TC423115	13.2499	70.8659	4.19839	5.4698
A_15_P131941	-4.18381	-2.06482	4.18381	down	AF210648	chr16:12048680-12049371	vars	valyl-tRNA synthetase [Source:ZFIN;Acc:ZDB-GENE-010601-1] [ENSDART00000004832]	GO:0004832|GO:0002161|GO:0000166|GO:0016874|GO:0006438|GO:0006412|GO:0005524|GO:0004812|GO:0006418	XM_677715	Dr.1481	114427	ENSDART00000004832	valyl-tRNA synthetase	TC375121	24.6122	242.842	5.10972	7.17454
A_15_P732161	-5.51597	-2.46361	5.51597	down	NM_001281788	chr20:26442240-26442181	akap12b	Danio rerio A kinase (PRKA) anchor protein (gravin) 12b (akap12b), transcript variant 1, mRNA [NM_001281788]	GO:0060028|GO:0007165|GO:0000902|GO:0048471|GO:0005737|GO:0035024|GO:0032060|GO:0009887|GO:0006605	NM_001281788	Dr.104704	567365	ENSDART00000110883	A kinase (PRKA) anchor protein (gravin) 12b	TC441440	822.546	7886.15	9.87677	12.3404
A_15_P182471	-2.4602	-1.29878	2.4602	down	NM_199574	chr19:17155477-17155418	srsf4	Danio rerio serine/arginine-rich splicing factor 4 (srsf4), mRNA [NM_199574]	GO:0000166|GO:0005575|GO:0003676	NM_199574	Dr.4165	321872	ENSDART00000105219	serine/arginine-rich splicing factor 4	TC384451	5630.22	20115.5	12.4099	13.7087
A_15_P178591	-3.65953	-1.87166	3.65953	down	BC142767	chr22:39569073-39568934	ncl	nucleolin [Source:ZFIN;Acc:ZDB-GENE-030131-6986] [ENSDART00000125916]	GO:0000166|GO:0003676	XM_005170547	Dr.75207	767714	ENSDART00000125916	nucleolin	TC388765	3160.07	17584.2	11.6269	13.4986
A_15_P283661	-2.44957	-1.29253	2.44957	down	XM_002665084	chr17:459451-458557		Rep: Ryanodine receptor 3 (Brain-type ryanodine receptor) (RyR3) (RYR-3) (Brain ryanodine receptor-calcium release channel). - Takifugu rubripes, partial (7%) [TC400796]	GO:0005515|GO:0030018|GO:0007584|GO:0051480|GO:0042493|GO:0005624|GO:0005575|GO:0051592|GO:0003674|GO:0008150|GO:0005887|GO:0032026|GO:0015278|GO:0006816|GO:0019717|GO:0005219	XM_002665084					TC400796	9.40534	51.9075	3.72504	5.01756
A_15_P741426	-4.07947	-2.02838	4.07947	down	NM_001045208	chr13:12969331-12969390	letm1	Danio rerio leucine zipper-EF-hand containing transmembrane protein 1 (letm1), mRNA [NM_001045208]	GO:0005739|GO:0016020|GO:0005509|GO:0005743|GO:0016021|GO:0046872	NM_001045208	Dr.78796	570745		leucine zipper-EF-hand containing transmembrane protein 1	TC369002	15.1993	141.496	4.40094	6.42932
A_15_P211666	-2.18528	-1.12782	2.18528	down	NM_001007286	chr17:15360760-15360534	fyna	Danio rerio FYN oncogene related to SRC, FGR, YES a (fyna), mRNA [NM_001007286]	GO:0045859|GO:0051480|GO:0005634|GO:0007275|GO:0005524|GO:0046872|GO:0001702|GO:0005829|GO:0016310|GO:0005737|GO:0060027|GO:0046777|GO:0004672|GO:0000166|GO:0016301|GO:0006468|GO:0004713|GO:0004715|GO:0016740|GO:0016772	NM_001007286	Dr.118811	373872	ENSDART00000046414	FYN oncogene related to SRC, FGR, YES a	TC391517	76.5769	393.33	6.72656	7.85438
A_15_P728206	-2.86692	-1.5195	2.86692	down	NM_173250	chr16:32722876-32722817	cct3	Danio rerio chaperonin containing TCP1, subunit 3 (gamma) (cct3), mRNA [NM_173250]	GO:0005737|GO:0000166|GO:0006457|GO:0046671|GO:0051082|GO:0044267|GO:0005524|GO:0048048	NM_173250	Dr.26749	192327	ENSDART00000134538	chaperonin containing TCP1, subunit 3 (gamma)	TC397406	3476.49	15114.9	11.7613	13.2808
A_15_P109566	-2.44141	-1.28772	2.44141	down	NM_001007348	chr23:36476525-36476466	csad	Danio rerio cysteine sulfinic acid decarboxylase (csad), mRNA [NM_001007348]	GO:0007507|GO:0030170|GO:0016831|GO:0005575|GO:0042412|GO:0003824|GO:0019752|GO:0016829	NM_001007348	Dr.108168	492476	ENSDART00000024354	cysteine sulfinic acid decarboxylase	TC371508	435.394	2121.66	9.06626	10.354
A_15_P117209	-2.32451	-1.21692	2.32451	down	EG584176	chr21:32395849-32395790		N-deacetylase/N-sulfotransferase (heparan glucosaminyl) 1 [Source:HGNC Symbol;Acc:7680] [ENSDART00000085748]		XM_001923324	Dr.33555		ENSDART00000085748		TC453657	43.2539	236.627	5.92374	7.14066
A_15_P492362	-2.57792	-1.36621	2.57792	down	XM_695526	chr10:41194709-41201800	LOC571887	kin of IRRE like 3 a [Source:ZFIN;Acc:ZDB-GENE-091117-44] [ENSDART00000113414]		XM_695526		571887	ENSDART00000113414	kin of IRRE-like protein 3-like	TC396798	11.755	67.2899	4.03042	5.39663
A_15_P463645	-2.15324	-1.10651	2.15324	down	NM_200820	chr6:24028753-24028812	uqcrc1	Danio rerio ubiquinol-cytochrome c reductase core protein I (uqcrc1), mRNA [NM_200820]	GO:0003824|GO:0046872	NM_200820	Dr.77076	393793	ENSDART00000128047	ubiquinol-cytochrome c reductase core protein I	TC412480	4376.34	13987.6	12.0626	13.1691
A_15_P289601	-2.70892	-1.43772	2.70892	down	NM_201130	chr3:20703813-20703754	spop	Danio rerio speckle-type POZ protein (spop), mRNA [NM_201130]	GO:0016567|GO:0016607|GO:0031463|GO:0043161|GO:0005634	NM_201130	Dr.82336	100005514	ENSDART00000016612	speckle-type POZ protein	TC369154	220.501	1288.66	8.1665	9.60422
A_15_P736837	-2.67939	-1.4219	2.67939	down	NM_201475	chr8:2763469-2763410	seta	Danio rerio SET translocation (myeloid leukemia-associated) A (seta), mRNA [NM_201475]	GO:0006334|GO:0005634	NM_201475	Dr.75951	323501	ENSDART00000139532	SET translocation (myeloid leukemia-associated) A	TC404289	7940.23	29863.4	12.8876	14.3095
A_15_P655711	-2.34007	-1.22655	2.34007	down	NM_001007200	chr9:29981683-29979442	ptpn4a	Danio rerio protein tyrosine phosphatase, non-receptor type 4, a (ptpn4a), mRNA [NM_001007200]	GO:0008092|GO:0016791|GO:0005737|GO:0006470|GO:0016787|GO:0016311|GO:0004721|GO:0005856|GO:0004725	NM_001007200	Dr.96224	368448	ENSDART00000000670	protein tyrosine phosphatase, non-receptor type 4, a	TC367445	60.4641	330.151	6.38643	7.61298
A_15_P660286	-2.40196	-1.26421	2.40196	down	NM_001111239	chr21:29005192-29005133	LOC100002393	Danio rerio uncharacterized LOC100002393 (LOC100002393), mRNA [NM_001111239]		NM_001111239	Dr.119868	100002393	ENSDART00000066363	uncharacterized LOC100002393	TC392630	838.132	3585.24	9.89744	11.1616
A_15_P197406	-2.59069	-1.37334	2.59069	down	NM_001126432	chr13:25756315-25756374	inpp5f	Danio rerio inositol polyphosphate-5-phosphatase F (inpp5f), mRNA [NM_001126432]	GO:0042578|GO:0005575	NM_001126432	Dr.88641	570007	ENSDART00000087604	inositol polyphosphate-5-phosphatase F	TC367483	32.6223	196.441	5.51035	6.88368
A_15_P732206	-2.25156	-1.17092	2.25156	down	NM_001015057	chr2:16588280-16588104	tfa	Danio rerio transferrin-a (tfa), mRNA [NM_001015057]	GO:0006879|GO:0009617|GO:0006826|GO:0005576|GO:0008199	NM_001015057	Dr.75658	30255	ENSDART00000125647	transferrin-a	TC425961	9598.85	29979.9	13.1424	14.3133
A_15_P462345	-3.82392	-1.93505	3.82392	down	NM_131269	chr10:43662022-43661963	tcf7l1a	Danio rerio transcription factor 7-like 1a (T-cell specific, HMG-box) (tcf7l1a), mRNA [NM_131269]	GO:0005515|GO:0021513|GO:0008284|GO:0003700|GO:0008013|GO:0044212|GO:0030178|GO:0048699|GO:0005634|GO:0048596|GO:0016055|GO:0021903|GO:0060070|GO:0005667|GO:0006355|GO:0010456|GO:0006357|GO:0007275|GO:0003677|GO:0006351|GO:0043565|GO:0003682|GO:0060323|GO:0030901|GO:0030900	NM_131269	Dr.79155	30523	ENSDART00000099262	transcription factor 7-like 1a (T-cell specific, HMG-box)	TC433989	90.211	791.43	6.94945	8.8845
A_15_P112019	-4.59346	-2.19958	4.59346	down	NM_001083844	chr24:29719601-29718649	col11a1a	Danio rerio collagen, type XI, alpha 1a (col11a1a), mRNA [NM_001083844]	GO:0005581|GO:0005201	NM_001083844	Dr.3536	565402	ENSDART00000003503	collagen, type XI, alpha 1a	TC365475	41.2289	448.791	5.85202	8.0516
A_15_P115600	-2.05423	-1.03859	2.05423	down	NM_001045854	chr19:24560193-24560252	pex11b	Danio rerio peroxisomal biogenesis factor 11 beta (pex11b), mRNA [NM_001045854]	GO:0003674|GO:0005779|GO:0016559	NM_001045854	Dr.82823	566742	ENSDART00000136275	peroxisomal biogenesis factor 11 beta	NP13225503	62.344	299.842	6.43512	7.47371
A_15_P196881	-11.9259	-3.57603	11.9259	down	NM_001256207	chr13:1039921-1039980	perp	Danio rerio PERP, TP53 apoptosis effector (perp), mRNA [NM_001256207]	GO:0016020|GO:0042981|GO:0016021|GO:0009411	NM_001256207	Dr.24063	494479	ENSDART00000148356	PERP, TP53 apoptosis effector	TC394357	68.8663	1870.02	6.57687	10.1529
A_15_P131706	-2.07561	-1.05354	2.07561	down	NM_001270571	chr19:7781088-7781627	brd2a	Danio rerio bromodomain-containing 2a (brd2a), transcript variant 2, mRNA [NM_001270571]	GO:0003674|GO:0005575	NM_001270571	Dr.75177	30445	ENSDART00000035967	bromodomain-containing 2a	TC372160	40.0508	193.233	5.80662	6.86015
A_15_P156971	-5.15943	-2.36721	5.15943	down	NM_199215	chr24:33861395-33855721	ca2	Danio rerio carbonic anhydrase II (ca2), mRNA [NM_199215]	GO:0008270|GO:0042539|GO:0004089|GO:0015670|GO:0006814|GO:0006730|GO:0071466|GO:0046872|GO:0006885	NM_199215	Dr.77009	387526	ENSDART00000038364	carbonic anhydrase II	TC365821	16.8062	200.554	4.54517	6.91238
A_15_P112412	-2.47688	-1.30853	2.47688	down	NM_001122840	chr2:31098540-31098599	colec12	Danio rerio collectin sub-family member 12 (colec12), mRNA [NM_001122840]	GO:0005581|GO:0016020|GO:0030246|GO:0016021|GO:0001570|GO:0046872	NM_001122840	Dr.75423	558942	ENSDART00000086863	collectin sub-family member 12	TC439055	79.3851	458.543	6.77582	8.08435
A_15_P446320	-2.2762	-1.18663	2.2762	down	AL924674	chr25:21790215-21790156		Uncharacterized protein [Source:UniProtKB/TrEMBL;Acc:E7F2F9] [ENSDART00000086631]		XM_002666846	Dr.156307		ENSDART00000086631		TC409756	126.319	653.713	7.41398	8.60061
A_15_P259316	-2.29579	-1.19899	2.29579	down	NM_200666	chr18:43185990-43187196	ilvbl	Danio rerio ilvB (bacterial acetolactate synthase)-like (ilvbl), mRNA [NM_200666]	GO:0000287|GO:0016020|GO:0016021|GO:0030976|GO:0003824|GO:0046872|GO:0016740	NM_200666	Dr.12240	393639	ENSDART00000145190	ilvB (bacterial acetolactate synthase)-like	TC390115	10.9275	56.1257	3.93123	5.13022
A_15_P582592	-2.44975	-1.29264	2.44975	down	NM_001080013	chr19:21271847-21271906	adnp2b	Danio rerio ADNP homeobox 2b (adnp2b), mRNA [NM_001080013]	GO:0043249|GO:0046872	NM_001080013	Dr.76423	564171	ENSDART00000038942	ADNP homeobox 2b	TC426517	123.991	688.111	7.3873	8.67994
A_15_P658876	-2.04191	-1.02992	2.04191	down	NM_201299	chr1:56313450-56314110	tecrb	Danio rerio trans-2,3-enoyl-CoA reductase b (tecrb), mRNA [NM_201299]	GO:0006629|GO:0005737|GO:0016020|GO:0016021|GO:0016627	NM_201299	Dr.26496	326954	ENSDART00000108838	trans-2,3-enoyl-CoA reductase b	NP13225412	1435.77	4856.85	10.5846	11.6145
A_15_P734736	-2.38269	-1.25259	2.38269	down	NM_001002157	chr21:13941004-13941155	idh3b	Danio rerio isocitrate dehydrogenase 3 (NAD+) beta (idh3b), mRNA [NM_001002157]	GO:0051287|GO:0006099|GO:0000287|GO:0004449|GO:0016491|GO:0055114|GO:0016616	NM_001002157	Dr.119750	415247	ENSDART00000065777	isocitrate dehydrogenase 3 (NAD+) beta	TC420286	876.943	3695.35	9.95482	11.2074
A_15_P707456	-2.65251	-1.40736	2.65251	down	NM_201455	chr14:37904160-37904156	cct2	Danio rerio chaperonin containing TCP1, subunit 2 (beta) (cct2), mRNA [NM_201455]	GO:0005737|GO:0000166|GO:0006457|GO:0051082|GO:0070121|GO:0044267|GO:0005524|GO:0032402	NM_201455	Dr.117647	192326		chaperonin containing TCP1, subunit 2 (beta)	TC418231	1391.78	6087.96	10.5417	11.949
A_15_P728606	-4.95387	-2.30856	4.95387	down	NM_001130135	chr4:8943159-8943100	adm2a	Danio rerio adrenomedullin 2a (adm2a), mRNA [NM_001130135]	GO:0005179|GO:0005576	NM_001130135	Dr.41309	403114	ENSDART00000067193	adrenomedullin 2a	TC371546	5	41.993	2.40516	4.71372
A_15_P200631	-4.29266	-2.10187	4.29266	down	NM_001145787	chr1:37062119-37062178	dclk2	Danio rerio doublecortin-like kinase 2 (dclk2), transcript variant 2, mRNA [NM_001145787]	GO:0005524|GO:0008021|GO:0035556|GO:0016310|GO:0005737|GO:0046777|GO:0004672|GO:0000166|GO:0004674|GO:0016301|GO:0015630|GO:0006468|GO:0016740|GO:0016772	NM_001145787	Dr.85306	572548	ENSDART00000078206	doublecortin-like kinase 2	NP9502009	24.0198	242.868	5.073	7.17488
A_15_P571029	-3.9388	-1.97775	3.9388	down	NM_212936	chr3:59931927-59933994	nptx1l	Danio rerio neuronal pentraxin 1 like (nptx1l), mRNA [NM_212936]	GO:0008150|GO:0005575	NM_212936	Dr.8012	405872	ENSDART00000100327	neuronal pentraxin 1 like	TC368413	8.29555	73.538	3.53803	5.51578
A_15_P116666	-2.04774	-1.03403	2.04774	down	NM_131635	chr7:54632178-54632119	fgf4	Danio rerio fibroblast growth factor 4 (fgf4), mRNA [NM_131635]	GO:0007368|GO:0060271|GO:0070121|GO:0008083	NM_131635	Dr.79594	570435	ENSDART00000098283	fibroblast growth factor 4	TC366752	18.868	88.2459	4.72629	5.76032
A_15_P738538	-2.153	-1.10635	2.153	down	NM_213155	chr15:8933315-8933374	ap2s1	Danio rerio adaptor-related protein complex 2, sigma 1 subunit (ap2s1), mRNA [NM_213155]	GO:0008565|GO:0006810|GO:0016192|GO:0015031|GO:0006886|GO:0030117	NM_213155	Dr.76864	100148085	ENSDART00000033871	adaptor-related protein complex 2, sigma 1 subunit	TC450441	932.402	3544.9	10.0359	11.1423
A_15_P751856	-2.11678	-1.08187	2.11678	down	NM_178297	chr8:32290309-32290365	sepp1a	Danio rerio selenoprotein P, plasma, 1a (sepp1a), mRNA [NM_178297]	GO:0008430|GO:0005576	NM_178297	Dr.9483	352931	ENSDART00000145282	selenoprotein P, plasma, 1a	TC444385	16725.4	49536.3	13.976	15.0579
A_15_P709081	-6.80045	-2.76563	6.80045	down	NM_214688	chr10:44684160-44684219	vcanb	Danio rerio versican b (vcanb), mRNA [NM_214688]	GO:0001501|GO:0001957|GO:0005540|GO:0005509|GO:0030246|GO:0005575|GO:0007155	NM_214688	Dr.77767	323465	ENSDART00000012522	versican b	TC365487	5	57.552	2.40516	5.17079
A_15_P186231	-4.19813	-2.06975	4.19813	down	NM_001013542	chr6:54299865-54299806	zgc:101577	Danio rerio zgc:101577 (zgc:101577), mRNA [NM_001013542]		NM_001013542	Dr.7244	541415	ENSDART00000114920	zgc:101577	TC367532	29.6726	293.761	5.37386	7.4436
A_15_P774611	-2.36454	-1.24156	2.36454	down	NM_001109740	chr4:37228037-37227978	zgc:173619	Danio rerio zgc:173619 (zgc:173619), mRNA [NM_001109740]	GO:0008150|GO:0003676|GO:0046872	NM_001109740	Dr.126202	100006880	ENSDART00000150696	zgc:173619	NP13323113	5574.34	19198.4	12.3971	13.6386
A_15_P709151	-3.23954	-1.69579	3.23954	down	NM_001128526	chr8:12877787-12859989	phf13	Danio rerio PHD finger protein 19 (phf13), mRNA [NM_001128526]	GO:0008270|GO:0046872	NM_001128526	Dr.88989	560078	ENSDART00000147242	PHD finger protein 19	TC389060	5.95774	43.2782	3.05659	4.75238
A_15_P530227	-2.33548	-1.22372	2.33548	down	NM_001037667	chr25:5020835-5020976	ckap5	Danio rerio cytoskeleton associated protein 5 (ckap5), mRNA [NM_001037667]	GO:0008150|GO:0005575	NM_001037667	Dr.75286	492614	ENSDART00000123666	cytoskeleton associated protein 5	TC401890	182.576	949.005	7.92007	9.14379
A_15_P752511	-3.28388	-1.7154	3.28388	down	NM_200003	chr5:38546446-38546387	h3f3c	Danio rerio H3 histone, family 3C (h3f3c), mRNA [NM_200003]		NM_200003	Dr.75577	336231		H3 histone, family 3C	TC422333	11528.7	51645.7	13.4137	15.1291
A_15_P510237	-3.32198	-1.73204	3.32198	down	NM_131188	chr3:32950537-32950478	mylpfa	Danio rerio myosin light chain, phosphorylatable, fast skeletal muscle a (mylpfa), mRNA [NM_131188]	GO:0005509	NM_131188	Dr.75115	30429	ENSDART00000075465	myosin light chain, phosphorylatable, fast skeletal muscle a	TC423615	43776.4	170709	15.4502	17.1823
A_15_P748396	-5.12252	-2.35685	5.12252	down	BM070616	chr2:42500469-42500330	slco5a1	si:dkey-7l6.4 [Source:ZFIN;Acc:ZDB-GENE-070912-587] [ENSDART00000129492]	GO:0005215|GO:0016020|GO:0006810	XM_005171396	Dr.155867	570033	ENSDART00000129492	solute carrier organic anion transporter family, member 5A1	TC432662	12.8678	150.646	4.15988	6.51673
A_15_P745216	-2.75974	-1.46453	2.75974	down	NM_200458	chr2:56961647-56962106	eef2b	Danio rerio eukaryotic translation elongation factor 2b (eef2b), mRNA [NM_200458]	GO:0000166|GO:0003924|GO:0009790|GO:0005525|GO:0003746|GO:0006412|GO:0071466|GO:0006414	NM_200458	Dr.75112	326929	ENSDART00000023931	eukaryotic translation elongation factor 2b	TC406097	23765.9	88790.9	14.5062	15.9707
A_15_P692851	-2.61404	-1.38628	2.61404	down	NM_130993	Zv9_scaffold3503:26809-26868	crestin	Danio rerio crestin (crestin), mRNA [NM_130993]	GO:0003674|GO:0005575	NM_130993	Dr.117160	30186		crestin	TC398691	1925.1	8035.86	10.9805	12.3668
A_15_P579867	-2.37268	-1.24652	2.37268	down	NM_001002741	chr11:25710365-25710424	rnpep	Danio rerio arginyl aminopeptidase (aminopeptidase B) (rnpep), mRNA [NM_001002741]	GO:0019370|GO:0016787|GO:0004177|GO:0006508|GO:0008270|GO:0008233|GO:0005615|GO:0008237	NM_001002741	Dr.14523	437014	ENSDART00000005616	arginyl aminopeptidase (aminopeptidase B)	TC396904	98.775	537.543	7.07122	8.31774
A_15_P283461	-2.01018	-1.00732	2.01018	down	NM_001113576	chr9:38846923-38849880	pdia5	Danio rerio protein disulfide isomerase family A, member 5 (pdia5), mRNA [NM_001113576]	GO:0006662|GO:0015035|GO:0009055|GO:0045454|GO:0016853	NM_001113576	Dr.77759	556162	ENSDART00000122797	protein disulfide isomerase family A, member 5	TC417166	149.188	674.452	7.64113	8.64845
A_15_P189051	-2.24567	-1.16715	2.24567	down	NM_001044945	chr8:14730217-14730158	sin3b	Danio rerio SIN3 homolog B, transcription regulator (yeast) (sin3b), mRNA [NM_001044945]	GO:0006355|GO:0005634	NM_001044945	Dr.74013	560837	ENSDART00000090371	SIN3 homolog B, transcription regulator (yeast)	TC404900	856.593	3426.75	9.92686	11.094
A_15_P159306	-6.53731	-2.7087	6.53731	down	NM_001044757	chr4:15147280-15147221	atp2b1a	Danio rerio ATPase, Ca++ transporting, plasma membrane 1a (atp2b1a), mRNA [NM_001044757]	GO:0007605|GO:0060119|GO:0005524|GO:0046872|GO:0019829|GO:0005388|GO:0048919|GO:0000166|GO:0016020|GO:0016787|GO:0048840|GO:0070588|GO:0016021|GO:0006812	NM_001044757	Dr.76148	378746	ENSDART00000077664	ATPase, Ca++ transporting, plasma membrane 1a	TC382308	63.9777	967.518	6.47071	9.1794
A_15_P154236	-2.10448	-1.07347	2.10448	down	NM_001002359	chr17:12036680-12038630	sccpdha	Danio rerio saccharopine dehydrogenase a (sccpdha), mRNA [NM_001002359]	GO:0016491|GO:0055114	NM_001002359	Dr.77107	436632	ENSDART00000114668	saccharopine dehydrogenase a	TC423641	736.155	2854.93	9.73852	10.812
A_15_P496462	-2.9404	-1.55601	2.9404	down	NM_001077552	chr13:36834163-36832841	dcaf5	Danio rerio ddb1 and cul4 associated factor 5 (dcaf5), mRNA [NM_001077552]	GO:0008150|GO:0003674	NM_001077552	Dr.83785	560257	ENSDART00000084867	ddb1 and cul4 associated factor 5	TC367620	13.4944	89.4386	4.22461	5.78062
A_15_P582517	-2.25077	-1.17042	2.25077	down	NM_001079991	chr14:9694125-9694066	atoh8	Danio rerio atonal homolog 8 (atoh8), mRNA [NM_001079991]	GO:0061074|GO:0046983|GO:2001014	NM_001079991	Dr.22150	561606	ENSDART00000054689	atonal homolog 8	TC417586	208.754	1028.63	8.09499	9.26541
A_15_P227286	-2.38168	-1.25198	2.38168	down	NM_001089489	chr11:32436545-32436604	zgc:162816	Danio rerio zgc:162816 (zgc:162816), mRNA [NM_001089489]	GO:0008150|GO:0003674|GO:0005575	NM_001089489	Dr.74715	571260	ENSDART00000124830	zgc:162816	TC386036	92.8805	510.109	6.98631	8.23829
A_15_P182476	-2.6295	-1.39479	2.6295	down	NM_001083068	chr19:17179108-17179049	lrp12	Danio rerio low density lipoprotein receptor-related protein 12 (lrp12), mRNA [NM_001083068]		NM_001083068	Dr.79113	100034487	ENSDART00000109024	low density lipoprotein receptor-related protein 12	TC365720	201.498	1153.2	8.04875	9.44354
A_15_P144286	-2.38483	-1.25389	2.38483	down	NM_131613	chr7:39933187-39933128	celf1	Danio rerio cugbp, Elav-like family member 1 (celf1), mRNA [NM_131613]	GO:0008380|GO:0006397|GO:0007368|GO:0005737|GO:0000166|GO:0003723|GO:0005634|GO:0003730|GO:0061014|GO:0003729|GO:0003676|GO:0045495	NM_131613	Dr.75890	58137	ENSDART00000018448	cugbp, Elav-like family member 1	TC379556	1373.72	5404.21	10.5255	11.7794
A_15_P335214	-2.49104	-1.31675	2.49104	down	NM_001045108	chr18:22035419-22035650	fam65a	Danio rerio family with sequence similarity 65, member A (fam65a), mRNA [NM_001045108]		NM_001045108	Dr.88401	566573	ENSDART00000089549	family with sequence similarity 65, member A	TC365883	21.4754	121.997	4.91078	6.22753
A_15_P119310	-2.39053	-1.25733	2.39053	down	NM_212602	chr17:43904804-43902778	ahsa1l	Danio rerio AHA1, activator of heat shock protein ATPase homolog 1, like (ahsa1l), mRNA [NM_212602]	GO:0051087|GO:0006950|GO:0001671	NM_212602	Dr.2594	321945	ENSDART00000029771	AHA1, activator of heat shock protein ATPase homolog 1, like	TC408957	44.1647	248.769	5.95159	7.20892
A_15_P475000	-3.94402	-1.97967	3.94402	down	NM_001077384	chr1:24347883-24347824	sfrp2	Danio rerio secreted frizzled-related protein 2 (sfrp2), mRNA [NM_001077384]	GO:0008406|GO:0042813|GO:0017147|GO:0005886|GO:0005576|GO:0007275|GO:0009790|GO:0042995|GO:0030165|GO:0005737|GO:0007420|GO:0016055|GO:0060070|GO:0001944	NM_001077384	Dr.76476	566878		secreted frizzled-related protein 2	TC441553	499.043	3715.28	9.23962	11.2193
A_15_P470436	-5.05444	-2.33755	5.05444	down	NM_212637	chr10:6838855-6838797	mat2aa	Danio rerio methionine adenosyltransferase II, alpha a (mat2aa), mRNA [NM_212637]	GO:0000166|GO:0006556|GO:0006730|GO:0005524|GO:0004478|GO:0046872|GO:0016740	NM_212637	Dr.75135	323329	ENSDART00000112201	methionine adenosyltransferase II, alpha a	TC432753	963.003	8372.81	10.0809	12.4184
A_15_P106104	-2.20462	-1.14053	2.20462	down	NM_001003529	chr3:35936226-35936167	suz12a	Danio rerio suppressor of zeste 12 homolog (Drosophila) a (suz12a), mRNA [NM_001003529]	GO:0006355|GO:0035098|GO:0005634|GO:0046872|GO:0006351|GO:0016568	NM_001003529	Dr.159534	794171	ENSDART00000102952	suppressor of zeste 12 homolog (Drosophila) a	TC367920	683.067	2799.76	9.64585	10.7864
A_15_P450985	-2.251	-1.17056	2.251	down	NM_001030242	chr8:51674655-51674596	sypb	Danio rerio synaptophysin b (sypb), transcript variant 1, mRNA [NM_001030242]	GO:0005215|GO:0016020|GO:0006810|GO:0016021|GO:0008021	NM_001030242	Dr.126555	436774	ENSDART00000088240	synaptophysin b	TC410425	10.5626	53.0723	3.8829	5.05347
A_15_P571557	-2.91633	-1.54416	2.91633	down	BC155804	chr20:35149062-35149121		CDC42 binding protein kinase alpha (DMPK-like) [Source:HGNC Symbol;Acc:1737] [ENSDART00000114262]			Dr.89024		ENSDART00000114262		TC370528	2195.06	10120.6	11.1457	12.6899
A_15_P159336	-2.74579	-1.45722	2.74579	down	XM_001919346	chr6:21402425-21402366	lrrc8c	leucine rich repeat containing 8 family, member C [Source:ZFIN;Acc:ZDB-GENE-030131-2965] [ENSDART00000083330]		XM_001919346		571216	ENSDART00000083330	leucine rich repeat containing 8 family, member C	TC380843	77.3406	496.051	6.7403	8.19751
A_15_P111258	-5.43239	-2.44159	5.43239	down	NM_001164027	chr11:12311972-12312031	npepps	Danio rerio aminopeptidase puromycin sensitive (npepps), mRNA [NM_001164027]	GO:0004177|GO:0006508|GO:0008270|GO:0008237	NM_001164027	Dr.12473	407726	ENSDART00000130318	aminopeptidase puromycin sensitive	TC429066	46.096	590.042	6.00857	8.45016
A_15_P727146	-2.13047	-1.09117	2.13047	down	NM_199639	chr19:43628658-43628717	nfyc	Danio rerio nuclear transcription factor Y, gamma (nfyc), mRNA [NM_199639]	GO:0043565|GO:0005622|GO:0006355|GO:0016602|GO:0003700|GO:0060041|GO:0046982|GO:0005634	NM_199639	Dr.157	323445		nuclear transcription factor Y, gamma	TC389395	377.039	1637.26	8.86575	9.95693
A_15_P696346	-2.79355	-1.4821	2.79355	down	NM_214706	chr14:40342560-40342619	hnrnpa0b	Danio rerio heterogeneous nuclear ribonucleoprotein A0b (hnrnpa0b), mRNA [NM_214706]	GO:0019013|GO:0000166|GO:0030529|GO:0003676|GO:0019012	NM_214706	Dr.35374	334222	ENSDART00000144599	heterogeneous nuclear ribonucleoprotein A0b	TC386905	10319	40673	13.2515	14.7336
A_15_P718841	-4.11646	-2.0414	4.11646	down	NM_001005391	chr10:28997099-28996955	cltca	Danio rerio clathrin, heavy polypeptide a (Hc) (cltca), mRNA [NM_001005391]	GO:0030132|GO:0005198|GO:0030130|GO:0016192|GO:0006886	NM_001005391	Dr.77490	323579	ENSDART00000063849	clathrin, heavy polypeptide a (Hc)	TC403433	713.643	5290.23	9.7001	11.7415
A_15_P736111	-2.77685	-1.47345	2.77685	down	NM_199570	chr21:26124005-26124064	calm3b	Danio rerio calmodulin 3b (phosphorylase kinase, delta) (calm3b), mRNA [NM_199570]		NM_199570	Dr.76748	321808	ENSDART00000065392	calmodulin 3b (phosphorylase kinase, delta)	TC407502	6782.26	26685.3	12.6655	14.1389
A_15_P636726	-2.31601	-1.21164	2.31601	down	NM_213237	chr22:16765473-16765532	tal1	Danio rerio T-cell acute lymphocytic leukemia 1 (tal1), mRNA [NM_213237]	GO:0005634|GO:0048844|GO:0030878|GO:0030154|GO:0007507|GO:0048823|GO:0046983|GO:0030099|GO:0035162|GO:0030097|GO:0006355|GO:0001568|GO:0035050|GO:0060214|GO:0007275|GO:0060216|GO:0001525|GO:0060215|GO:0060218|GO:0060217|GO:0003677|GO:0006351|GO:0003007|GO:0048368|GO:0030218|GO:0001570|GO:0045603	NM_213237	Dr.75812	30766	ENSDART00000083063	T-cell acute lymphocytic leukemia 1	NP002734	36.7862	198.814	5.68852	6.90016
A_15_P591532	-2.40583	-1.26653	2.40583	down	EV757085	chr6:33594206-33594265	gpbp1l1	GC-rich promoter binding protein 1-like 1 [Source:ZFIN;Acc:ZDB-GENE-031118-220] [ENSDART00000110639]		XM_001336035	Dr.105558	799876	ENSDART00000110639	GC-rich promoter binding protein 1-like 1	TC392224	425.121	2057.23	9.03344	10.3
A_15_P182826	-2.51478	-1.33043	2.51478	down	NM_199639	chr19:43622933-43628555	nfyc	Danio rerio nuclear transcription factor Y, gamma (nfyc), mRNA [NM_199639]	GO:0043565|GO:0005622|GO:0006355|GO:0016602|GO:0003700|GO:0060041|GO:0046982|GO:0005634	NM_199639	Dr.157	323445	ENSDART00000102708	nuclear transcription factor Y, gamma	NP13325472	284.841	1523.71	8.51294	9.84338
A_15_P735261	-3.1252	-1.64395	3.1252	down	NM_213058	chr5:2517547-2517488	hspa5	Danio rerio heat shock protein 5 (hspa5), mRNA [NM_213058]	GO:0000166|GO:0006950|GO:0005576|GO:0005524	NM_213058	Dr.67791	378848	ENSDART00000010079	heat shock protein 5	TC390243	929.326	5055.14	10.0319	11.6758
A_15_P521587	-7.27388	-2.86272	7.27388	down	NM_001111182	chr12:12495938-12495879	htra1b	Danio rerio HtrA serine peptidase 1b (htra1b), mRNA [NM_001111182]	GO:0005737|GO:0019838|GO:0016787|GO:0004252|GO:0006508|GO:0008236|GO:0008233|GO:0005576|GO:0003824|GO:0001558|GO:0005829|GO:0005520	NM_001111182	Dr.80990	565082	ENSDART00000012318	HtrA serine peptidase 1b	TC366054	5	61.74	2.40516	5.26789
A_15_P285171	-3.03336	-1.60092	3.03336	down	NM_131621	chr13:22757902-22757961	bmpr1aa	Danio rerio bone morphogenetic protein receptor, type 1aa (bmpr1aa), mRNA [NM_131621]	GO:0005515|GO:0030509|GO:0009953|GO:0061371|GO:0005524|GO:0001947|GO:0016310|GO:0004672|GO:0000166|GO:0016020|GO:0060972|GO:0004674|GO:0016301|GO:0004675|GO:0005024|GO:0070724|GO:0060971|GO:0051260|GO:0006468|GO:0016740|GO:0016772	NM_131621	Dr.78292	58145	ENSDART00000026768	bone morphogenetic protein receptor, type 1aa	TC365862	444.094	2639.52	9.08923	10.6901
A_15_P133013	-2.08357	-1.05906	2.08357	down	NM_201293	chr8:25826039-25825980	ahcyl1	Danio rerio S-adenosylhomocysteine hydrolase-like 1 (ahcyl1), mRNA [NM_201293]	GO:0004013|GO:0016787|GO:0009953|GO:0006730	NM_201293	Dr.116121	798918	ENSDART00000078795	S-adenosylhomocysteine hydrolase-like 1	TC369880	887.419	3278.29	9.96898	11.028
A_15_P732801	-2.13446	-1.09387	2.13446	down	NM_001044709	chr5:41068916-41068774	antxr2a	Danio rerio anthrax toxin receptor 2a (antxr2a), mRNA [NM_001044709]	GO:0005886|GO:0000132|GO:0030496|GO:0017048|GO:0004872|GO:0003779|GO:0030864|GO:0016021|GO:0032154|GO:0070938|GO:0005768	NM_001044709	Dr.12251	557239	ENSDART00000085359	anthrax toxin receptor 2a	TC369737	16.7927	80.1433	4.54314	5.63702
A_15_P435060	-3.81635	-1.93219	3.81635	down	NM_213058	chr5:2518367-2518308	hspa5	Danio rerio heat shock protein 5 (hspa5), mRNA [NM_213058]	GO:0000166|GO:0006950|GO:0005576|GO:0005524	NM_213058	Dr.67791	378848	ENSDART00000010079	heat shock protein 5	TC414354	498.55	3607.86	9.23886	11.171
A_15_P274096	-4.02805	-2.01008	4.02805	down	NM_001082481	chr8:47224245-47224186	zgc:158399	Danio rerio zgc:158399 (zgc:158399), mRNA [NM_001082481]	GO:0008150|GO:0003674|GO:0005575	NM_001082481	Dr.47698	570789	ENSDART00000084241	zgc:158399	TC421926	25.9295	246.454	5.18575	7.19584
A_15_P530022	-2.8325	-1.50207	2.8325	down	NM_213051	chr23:43881722-43879631	abce1	Danio rerio ATP-binding cassette, sub-family E (OABP), member 1 (abce1), mRNA [NM_213051]	GO:0017111|GO:0051536|GO:0000166|GO:0009055|GO:0016887|GO:0005524	NM_213051	Dr.76901	406324	ENSDART00000015777	ATP-binding cassette, sub-family E (OABP), member 1	TC416466	1839.01	8351.29	10.9143	12.4164
A_15_P391975	-3.13624	-1.64904	3.13624	down	AW281979	chr10:38161922-38167651	sez6a	fj60a11.x1 zebrafish adult brain Danio rerio cDNA 3', mRNA sequence [AW281979]			Dr.81239	562079		seizure related 6 homolog a		154.194	1076.67	7.68701	9.33604
A_15_P222001	-2.38789	-1.25574	2.38789	down	NM_001098189	chr6:8676110-8672791	vps16	Danio rerio zgc:162584 (zgc:162584), mRNA [NM_001098189]	GO:0003674|GO:0005737|GO:0006886	NM_001098189	Dr.39353	798985	ENSDART00000151402	vacuolar protein sorting protein 16	TC366527	112.181	613.429	7.24998	8.50572
A_15_P108669	-3.42251	-1.77506	3.42251	down	NM_001111232	chr1:28010600-28010659	cbsa	Danio rerio cystathionine-beta-synthase a (cbsa), mRNA [NM_001111232]	GO:0019343|GO:0019344|GO:0005737|GO:0030554|GO:0006535|GO:0008652|GO:0004124|GO:0004122|GO:0016740	NM_001111232	Dr.82555	550524	ENSDART00000126746	cystathionine-beta-synthase a	NP13225962	52.045	422.106	6.1782	7.95325
A_15_P108197	-2.63321	-1.39683	2.63321	down	NM_001044339	chr18:16748540-16748481	zc3h18	Danio rerio zinc finger CCCH-type containing 18 (zc3h18), mRNA [NM_001044339]	GO:0005634	NM_001044339	Dr.159723	555770	ENSDART00000090446	zinc finger CCCH-type containing 18	TC418599	144.307	853.414	7.59548	8.99231
A_15_P148021	-3.09017	-1.62769	3.09017	down	NM_001082952	chr13:11158344-11158403	zbtb18	Danio rerio zinc finger and BTB domain containing 18 (zbtb18), mRNA [NM_001082952]	GO:0006355|GO:0005634|GO:0003676|GO:0003677|GO:0046872|GO:0006351	NM_001082952	Dr.94072	100003157	ENSDART00000056135	zinc finger and BTB domain containing 18	TC399719	205.155	1374.43	8.07272	9.70041
A_15_P714946	-7.65893	-2.93714	7.65893	down		chr5:70200678-70199727		Rep: CAP-Gly domain-containing linker protein 1 - Gallus gallus (Chicken), partial (42%) [TC426813]	GO:0008017|GO:0005882|GO:0005515|GO:0005881|GO:0007067|GO:0051010|GO:0000776|GO:0046872|GO:0042803|GO:0005768						TC426813	6.25866	107.619	3.11712	6.05426
A_15_P177681	-2.0239	-1.01714	2.0239	down	NM_001202420	chr18:37272416-37272474	fam214a	Danio rerio family with sequence similarity 214, member A (fam214a), mRNA [NM_001202420]		NM_001202420	Dr.159331	555595	ENSDART00000129750	family with sequence similarity 214, member A	TC439593	127.24	586.635	7.4248	8.44194
A_15_P473080	-3.84509	-1.94302	3.84509	down	NM_001044945	chr8:14742140-14736976	sin3b	Danio rerio SIN3 homolog B, transcription regulator (yeast) (sin3b), mRNA [NM_001044945]	GO:0006355|GO:0005634	NM_001044945	Dr.74013	560837	ENSDART00000090371	SIN3 homolog B, transcription regulator (yeast)	TC419110	43.5041	399.578	5.93277	7.87579
A_15_P342425	-2.29664	-1.19953	2.29664	down	NM_213117	chr22:35356375-35356316	zgc:65870	Danio rerio zgc:65870 (zgc:65870), mRNA [NM_213117]	GO:0008150|GO:0003723|GO:0005575	NM_213117	Dr.4035	406391	ENSDART00000148681	zgc:65870	TC432288	20.3681	106.128	4.83328	6.0328
A_15_P267996	-3.48771	-1.80228	3.48771	down	XM_002663984	chr12:33597514-33597455	LOC100333648	glutamate receptor, ionotropic, N-methyl D-aspartate 2Cb [Source:ZFIN;Acc:ZDB-GENE-100308-2] [ENSDART00000112881]		XM_002663984		100333648	ENSDART00000112881	glutamate receptor ionotropic, NMDA 2C-like	TC365783	5	29.7324	2.40516	4.20744
A_15_P288786	-2.00026	-1.00019	2.00026	down	XM_001342001	chr12:18605416-18610051	cyth3	cytohesin 3 [Source:ZFIN;Acc:ZDB-GENE-120612-1] [ENSDART00000020628]		XM_001342001		100002190	ENSDART00000020628	cytohesin 3	TC414409	27.2489	124.828	5.25878	6.25897
A_15_P470810	-2.91744	-1.5447	2.91744	down	NM_001007105	chr2:37904629-37904570	acin1a	Danio rerio apoptotic chromatin condensation inducer 1a (acin1a), mRNA [NM_001007105]	GO:0000166|GO:0003676	NM_001007105	Dr.32211	368893	ENSDART00000128043	apoptotic chromatin condensation inducer 1a	TC432850	352.562	2085.6	8.77991	10.3246
A_15_P103990	-2.89143	-1.53178	2.89143	down	AF031375	Zv9_NA989:889-948	ldb1b	Danio rerio LIM-domain binding factor 1 mRNA, complete cds. [AF031375]	GO:0003712|GO:0030274|GO:0005634		Dr.598	30576		LIM-domain binding factor 1b	TC375704	81.3892	545.661	6.80793	8.33971
A_15_P147276	-2.17085	-1.11826	2.17085	down	NM_001135142	chr5:52790800-52790859	zgc:194398	Danio rerio zgc:194398 (zgc:194398), mRNA [NM_001135142]	GO:0008150|GO:0003674|GO:0005575	NM_001135142	Dr.91863	100189615	ENSDART00000110377	zgc:194398	TC367703	30.0859	150.131	5.39375	6.51201
A_15_P492047	-2.25869	-1.17549	2.25869	down	CO918971	chr10:25081552-25081493		proline and serine rich 1 [Source:HGNC Symbol;Acc:20291] [ENSDART00000128902]		XM_679230	Dr.155618		ENSDART00000128902		TC444189	1555.57	5744.51	10.6896	11.8651
A_15_P741166	-2.26012	-1.1764	2.26012	down	NM_001017669	chr7:45673034-45672975	dync1li2	Danio rerio dynein, cytoplasmic 1, light intermediate chain 2 (dync1li2), mRNA [NM_001017669]	GO:0007264|GO:0005868|GO:0005525|GO:0003777|GO:0007018	NM_001017669	Dr.122529	573266	ENSDART00000037850	dynein, cytoplasmic 1, light intermediate chain 2	TC383004	108.271	559.288	7.201	8.3774
A_15_P289481	-2.50808	-1.32658	2.50808	down	NM_212866	chr7:27727149-27722654	plscr3b	Danio rerio phospholipid scramblase 3b (plscr3b), mRNA [NM_212866]	GO:0008150|GO:0005575	NM_212866	Dr.16684	405802	ENSDART00000101057	phospholipid scramblase 3b	TC450714	416.451	2094.04	9.00417	10.3307
A_15_P651721	-2.23091	-1.15763	2.23091	down	NM_001115109	chr4:47775534-47775475	zgc:175008	Danio rerio zgc:175008 (zgc:175008), mRNA [NM_001115109]	GO:0008150|GO:0003676|GO:0046872	NM_001115109	Dr.124908	100141494	ENSDART00000126060	zgc:175008	NP13317238	4567.87	15161.5	12.1273	13.285
A_15_P724181	-2.47452	-1.30715	2.47452	down	NM_214696	chr20:2764931-2765867	syncrip	Danio rerio synaptotagmin binding, cytoplasmic RNA interacting protein (syncrip), mRNA [NM_214696]	GO:0000166|GO:0003676	NM_214696	Dr.75407	326663	ENSDART00000129870	synaptotagmin binding, cytoplasmic RNA interacting protein	TC454009	1039.49	4440.96	10.1793	11.4864
A_15_P707176	-2.46751	-1.30305	2.46751	down	EH454175	chr18:45199341-45199400	wu:fk57f03	FDR103-P00063-DEPE-F_B11 FDR103 Danio rerio cDNA clone FDR103-P00063-BR_B11 5', mRNA sequence [EH454175]		XM_001336435	Dr.81974	335697		wu:fk57f03	TC387531	8.21294	45.5349	3.52112	4.82417
A_15_P152711	-2.45581	-1.2962	2.45581	down	NM_001045137	chr9:28449892-28449740	stxbp5l	Danio rerio syntaxin binding protein 5-like (stxbp5l), mRNA [NM_001045137]	GO:0005737|GO:0016020|GO:0005886|GO:0006810|GO:0016021|GO:0016192|GO:0015031|GO:0006887	NM_001045137	Dr.135418	567605	ENSDART00000017292	syntaxin binding protein 5-like	TC366311	5	21.3339	2.40516	3.70136
A_15_P472820	-6.59244	-2.72081	6.59244	down	NM_001102676	chr19:36981531-36981515	anln	Danio rerio anillin, actin binding protein (anln), mRNA [NM_001102676]	GO:0005543	NM_001102676	Dr.74227	562517	ENSDART00000113574	anillin, actin binding protein	TC365556	30.5137	474.202	5.41262	8.13343
A_15_P731286	-2.95019	-1.56081	2.95019	down	NM_205673	chr5:38498910-38498969	srsf7a	Danio rerio serine/arginine-rich splicing factor 7a (srsf7a), mRNA [NM_205673]	GO:0000166|GO:0008270|GO:0005575|GO:0003676|GO:0046872	NM_205673	Dr.701	402972	ENSDART00000135776	serine/arginine-rich splicing factor 7a	TC447976	7873.64	32883	12.8758	14.4366
A_15_P647191	-2.82192	-1.49668	2.82192	down	NM_194378	chr2:20769151-20769210	arpc5a	Danio rerio actin related protein 2/3 complex, subunit 5A (arpc5a), mRNA [NM_194378]	GO:0005737|GO:0030833|GO:0005856	NM_194378	Dr.76631	336504	ENSDART00000057174	actin related protein 2/3 complex, subunit 5A	TC387173	274.679	1641.64	8.46277	9.95945
A_15_P414895	-2.46286	-1.30034	2.46286	down	NM_212704	chr3:26698105-26698070	rhot1a	Danio rerio ras homolog gene family, member T1a (rhot1a), mRNA [NM_212704]	GO:0019725|GO:0007264|GO:0005509|GO:0003924|GO:0005741|GO:0005525|GO:0046872|GO:0005622|GO:0005739|GO:0047497|GO:0000166|GO:0016020|GO:0016787|GO:0016021|GO:0031307	NM_212704	Dr.6639	327143	ENSDART00000115347	ras homolog gene family, member T1a	TC410517	45.198	262.818	5.98341	7.28375
A_15_P402005	-2.40514	-1.26612	2.40514	down	NM_001077760	chr5:71131247-71130016	zgc:152816	Danio rerio zgc:152816 (zgc:152816), mRNA [NM_001077760]	GO:0000166|GO:0008270|GO:0005634|GO:0003676	NM_001077760	Dr.121164	777712	ENSDART00000114395	zgc:152816	TC366790	164.59	884.383	7.7762	9.04232
A_15_P726596	-3.64119	-1.86441	3.64119	down	NM_001077533	chr12:14354536-14355313	atp2a1l	Danio rerio ATPase, Ca++ transporting, cardiac muscle, fast twitch 1 like (atp2a1l), mRNA [NM_001077533]	GO:0019829|GO:0005388|GO:0016787|GO:0016020|GO:0000166|GO:0006816|GO:0016021|GO:0005524|GO:0046872|GO:0006812	NM_001077533	Dr.132724	494489	ENSDART00000105896	ATPase, Ca++ transporting, cardiac muscle, fast twitch 1 like	TC408757	5	30.9713	2.40516	4.26957
A_15_P271466	-2.4911	-1.31678	2.4911	down	NM_001083837	chr16:34980490-34980431	pnisr	Danio rerio PNN-interacting serine/arginine-rich protein (pnisr), mRNA [NM_001083837]		NM_001083837	Dr.76955	563938	ENSDART00000133071	PNN-interacting serine/arginine-rich protein	TC404982	417.3	2084.3	9.00668	10.3235
A_15_P726786	-2.20394	-1.14009	2.20394	down	NM_201082	chr18:6101746-6101687	calub	Danio rerio calumenin b (calub), mRNA [NM_201082]	GO:0042470|GO:0016529|GO:0005783|GO:0005509|GO:0033018|GO:0005576|GO:0046872	NM_201082	Dr.1956	394057	ENSDART00000005405	calumenin b	TC394710	974.565	3758.74	10.0976	11.2377
A_15_P152511	-4.13481	-2.04782	4.13481	down	NM_131628	chr23:27493046-27492987	scn8aa	Danio rerio sodium channel, voltage-gated, type VIII, alpha a (scn8aa), mRNA [NM_131628]	GO:0008345|GO:0005244|GO:0005272|GO:0005248|GO:0055085|GO:0008045|GO:0016020|GO:0005887|GO:0006810|GO:0034765|GO:0001518|GO:0016021|GO:0007638|GO:0006814|GO:0005216|GO:0006811	NM_131628	Dr.82518	58152	ENSDART00000022042	sodium channel, voltage-gated, type VIII, alpha a	TC365393	6.31872	57.9061	3.13154	5.17936
A_15_P103078	-2.0381	-1.02723	2.0381	down	NM_212667	chr21:22135845-22135786	dlat	Danio rerio dihydrolipoamide S-acetyltransferase (E2 component of pyruvate dehydrogenase complex) (dlat), mRNA [NM_212667]	GO:0009583|GO:0004742|GO:0016746|GO:0050908|GO:0006090|GO:0008152|GO:0004738|GO:0045254|GO:0016740|GO:0006086	NM_212667	Dr.31625	324201	ENSDART00000016502	dihydrolipoamide S-acetyltransferase (E2 component of pyruvate dehydrogenase complex)	TC419427	1628.32	5400.14	10.7513	11.7786
A_15_P119084	-5.37851	-2.42721	5.37851	down	NM_001029958	chr20:13732581-13732640	lpgat1	Danio rerio lysophosphatidylglycerol acyltransferase 1 (lpgat1), mRNA [NM_001029958]	GO:0016746|GO:0008152	NM_001029958	Dr.47567	561832	ENSDART00000152497	lysophosphatidylglycerol acyltransferase 1	TC391365	17.1529	214.956	4.5777	7.0049
A_15_P208641	-2.93443	-1.55308	2.93443	down	NM_001024923	chr16:48798085-48798144	smg5	Danio rerio Smg-5 homolog, nonsense mediated mRNA decay factor (C. elegans) (smg5), mRNA [NM_001024923]	GO:0009790	NM_001024923	Dr.36786	553261	ENSDART00000060809	Smg-5 homolog, nonsense mediated mRNA decay factor (C. elegans)	TC366072	228.512	1441.21	8.21371	9.76679
A_15_P466085	-3.35466	-1.74617	3.35466	down	NM_001002610	chr20:28897513-28897454	srsf5b	Danio rerio serine/arginine-rich splicing factor 5b (srsf5b), mRNA [NM_001002610]	GO:0008150|GO:0000166|GO:0005575|GO:0003676	NM_001002610	Dr.80489	436883	ENSDART00000134564	serine/arginine-rich splicing factor 5b	TC426836	51.0838	405.939	6.15351	7.89967
A_15_P739816	-4.57584	-2.19404	4.57584	down	NM_001130853	chr2:42325673-42325732	si:ch211-235o23.1	Danio rerio si:ch211-235o23.1 (si:ch211-235o23.1), mRNA [NM_001130853]		NM_001130853	Dr.82064	570302	ENSDART00000147019	si:ch211-235o23.1	TC388816	7.97855	82.3246	3.47752	5.67155
A_15_P413110	-2.94892	-1.56018	2.94892	down	NM_001110393	chr13:1179813-1179754	olig3	Danio rerio oligodendrocyte transcription factor 3 (olig3), mRNA [NM_001110393]	GO:0046983	NM_001110393	Dr.77024	566728	ENSDART00000111052	oligodendrocyte transcription factor 3	TC389540	78.5224	539.621	6.76308	8.32327
A_15_P180421	-2.62911	-1.39458	2.62911	down	NM_001083812	chr21:10196539-10196695	ell2	Danio rerio elongation factor, RNA polymerase II, 2 (ell2), mRNA [NM_001083812]	GO:0006368|GO:0008023	NM_001083812	Dr.77474	322997	ENSDART00000102408	elongation factor, RNA polymerase II, 2	TC371037	157.826	927.395	7.71885	9.11343
A_15_P529137	-2.9236	-1.54775	2.9236	down	NM_212893	chr2:18017486-18017758	dpydb	Danio rerio dihydropyrimidine dehydrogenase b (dpydb), mRNA [NM_212893]	GO:0017113|GO:0006214|GO:0051539|GO:0051536|GO:0006212|GO:0006222|GO:0009055|GO:0003824|GO:0046872|GO:0019483|GO:0005737|GO:0000166|GO:0004152|GO:0016491|GO:0004158|GO:0055114	NM_212893	Dr.161770	405829	ENSDART00000124724	dihydropyrimidine dehydrogenase b	TC366239	21.8651	147.224	4.9364	6.48414
A_15_P117976	-2.58713	-1.37135	2.58713	down	XR_117810	chr13:27859293-27858804		regulating synaptic membrane exocytosis 1a [Source:ZFIN;Acc:ZDB-GENE-090312-135] [ENSDART00000142568]		XR_117810	Dr.16325		ENSDART00000142568		TC406790	8.87125	51.2741	3.62848	4.99984
A_15_P119865	-2.20573	-1.14126	2.20573	down	NM_001161470	chr21:33845138-33845085	LOC325449	Danio rerio kinesin family member 20A (LOC325449), mRNA [NM_001161470]		NM_001161470	Dr.132711	325449	ENSDART00000065337	kinesin family member 20A	TC366924	715.033	2907.54	9.70249	10.8437
A_15_P146051	-5.02294	-2.32853	5.02294	down	NM_001002651	chr5:22627631-22628721	limk2	Danio rerio LIM domain kinase 2 (limk2), mRNA [NM_001002651]	GO:0016310|GO:0004672|GO:0016301|GO:0008270|GO:0006468|GO:0005575|GO:0005524|GO:0046872|GO:0016740|GO:0016772	NM_001002651	Dr.76343	436924	ENSDART00000139260	LIM domain kinase 2	NP13229263	14.9007	171.373	4.36912	6.69765
A_15_P743481	-2.36728	-1.24323	2.36728	down	NM_200955	chr24:25069715-25069774	bhlhe22	Danio rerio basic helix-loop-helix family, member e22 (bhlhe22), mRNA [NM_200955]	GO:0046983	NM_200955	Dr.84568	393930	ENSDART00000080840	basic helix-loop-helix family, member e22	TC434630	46.9714	261.29	6.0328	7.27603
A_15_P475150	-2.45613	-1.29638	2.45613	down	XM_001924015	chr13:22205927-22205986	ndst2a	N-deacetylase/N-sulfotransferase (heparan glucosaminyl) 2a [Source:ZFIN;Acc:ZDB-GENE-060810-182] [ENSDART00000125149]	GO:0016787|GO:0008146|GO:0005575|GO:0015016	XM_001924015		793524	ENSDART00000125149	N-deacetylase/N-sulfotransferase (heparan glucosaminyl) 2a	TC387058	23.0185	129.08	5.01102	6.30741
A_15_P231826	-3.26345	-1.7064	3.26345	down	DQ355789	chr3:32868229-32868288	setd1a	SET domain containing 1A [Source:ZFIN;Acc:ZDB-GENE-080521-4] [ENSDART00000083821]	GO:0000166|GO:0008168|GO:0005634|GO:0003676|GO:0032259|GO:0016740|GO:0018024	XM_005164079	Dr.131006	556535	ENSDART00000083821	SET domain containing 1A	TC367190	11.3449	83.4265	3.98289	5.68929
A_15_P118276	-2.66444	-1.41383	2.66444	down	XM_005172716	chr10:33532404-33535955	map6a	microtubule-associated protein 6 [Source:ZFIN;Acc:ZDB-GENE-050208-42] [ENSDART00000109029]	GO:0008017|GO:0005516|GO:0005874|GO:0000226	XM_005172716		100000844	ENSDART00000109029	microtubule-associated protein 6a	TC396927	5.875	35.184	3.03722	4.45105
A_15_P748276	-2.16137	-1.11195	2.16137	down	NM_001139438	chr12:28107840-28107781	acsf2	Danio rerio acyl-CoA synthetase family member 2 (acsf2), transcript variant 2, mRNA [NM_001139438]	GO:0006629|GO:0005739|GO:0000166|GO:0016874|GO:0008152|GO:0006631|GO:0003824|GO:0005524	NM_001139438	Dr.79130	751707	ENSDART00000138437	acyl-CoA synthetase family member 2	TC437128	225.935	1061.36	8.1988	9.31075
A_15_P183181	-2.22321	-1.15264	2.22321	down	NM_001122628	chr23:4445700-4445225	si:ch73-142c19.1	Danio rerio si:ch73-142c19.1 (si:ch73-142c19.1), mRNA [NM_001122628]		NM_001122628	Dr.120318	100142653	ENSDART00000081823	si:ch73-142c19.1	TC392649	10.3065	51.315	3.84785	5.00049
A_15_P531592	-2.6971	-1.43141	2.6971	down	NM_131587	chr9:35989340-35989482	gabpa	Danio rerio GA-binding protein transcription factor, alpha subunit (gabpa), mRNA [NM_131587]	GO:0043565|GO:0006355|GO:0003700|GO:0005634|GO:0003677	NM_131587	Dr.77675	58110	ENSDART00000140110	GA-binding protein transcription factor, alpha subunit	TC405963	301.188	1700.5	8.5818	10.0132
A_15_P164346	-6.20504	-2.63344	6.20504	down	NM_001045195	chr19:797409-797680	nrm	Danio rerio nurim (nuclear envelope membrane protein (nrm), mRNA [NM_001045195]	GO:0016020|GO:0005637|GO:0005634|GO:0016021|GO:0005635	NM_001045195	Dr.92398	570027	ENSDART00000093304	nurim (nuclear envelope membrane protein	TC381727	15.3531	221.205	4.41529	7.04873
A_15_P516442	-2.07548	-1.05345	2.07548	down	XM_005166502	chr7:52648572-52648631	col4a5	collagen, type IV, alpha 5 (Alport syndrome) [Source:ZFIN;Acc:ZDB-GENE-030131-2281] [ENSDART00000073827]	GO:0031290|GO:0007412|GO:0005581|GO:0030198|GO:0005201	XM_005166502		323561	ENSDART00000073827	collagen, type IV, alpha 5 (Alport syndrome)	TC404697	6062.27	18299.3	12.5141	13.5676
A_15_P342870	-2.639	-1.39999	2.639	down	NM_212732	chr11:23846194-23844429	mdm4	Danio rerio transformed 3T3 cell double minute 4 homolog (mouse) (mdm4), mRNA [NM_212732]	GO:0071157|GO:0043066|GO:0008270|GO:0005634|GO:0046872	NM_212732	Dr.48996	334932	ENSDART00000080201	transformed 3T3 cell double minute 4 homolog (mouse)	TC407952	120.087	716.973	7.34089	8.74089
A_15_P691541	-3.57252	-1.83694	3.57252	down	NM_199824	chr7:44444249-44444190	arl8	Danio rerio ADP-ribosylation factor-like 8 (arl8), mRNA [NM_199824]	GO:0005622|GO:0000166|GO:0007264|GO:0005525	NM_199824	Dr.70549	327551	ENSDART00000111590	ADP-ribosylation factor-like 8	TC445591	501.376	3395.5	9.24513	11.0821
A_15_P736026	-2.10428	-1.07333	2.10428	down	NM_131263	chr19:45288054-45288113	eef1a1l1	Danio rerio eukaryotic translation elongation factor 1 alpha 1, like 1 (eef1a1l1), mRNA [NM_131263]	GO:0005737|GO:0000166|GO:0003924|GO:0005525|GO:0003746|GO:0006412|GO:0006414	NM_131263	Dr.31797	30516	ENSDART00000039129	eukaryotic translation elongation factor 1 alpha 1, like 1	TC449441	40291	109740	15.3129	16.3862
A_15_P504952	-9.09725	-3.18543	9.09725	down	NM_213317	chr7:23960013-23960070	rbm4.3	Danio rerio RNA binding motif protein 4.3 (rbm4.3), mRNA [NM_213317]	GO:0004672|GO:0000166|GO:0006468|GO:0005575|GO:0003676|GO:0005524|GO:0016772	NM_213317	Dr.5277	406277	ENSDART00000037817	RNA binding motif protein 4.3	TC400302	57.3349	1194.72	6.31025	9.49569
A_15_P759936	-2.67828	-1.42131	2.67828	down	NM_001003944	chr9:58179962-58179732	actr3	Danio rerio ARP3 actin-related protein 3 homolog (yeast) (actr3), mRNA [NM_001003944]	GO:0034314|GO:0030833|GO:0005885|GO:0005856|GO:0005524	NM_001003944	Dr.31830	406250	ENSDART00000112016	ARP3 actin-related protein 3 homolog (yeast)	TC433057	107.608	658.581	7.19172	8.61303
A_15_P764466	-3.65439	-1.86963	3.65439	down		Zv9_NA787:000054216-000054157										172.019	1385.11	7.8409	9.71053
A_15_P436670	-2.03734	-1.02669	2.03734	down	NM_001139479	chr15:20084901-20084842	a2ml	Danio rerio alpha-2-macroglobulin-like (a2ml), mRNA [NM_001139479]	GO:0001889|GO:0004866|GO:0005576|GO:0005615	NM_001139479	Dr.75455	100006972	ENSDART00000078734	alpha-2-macroglobulin-like	TC408193	843.608	3075.7	9.90498	10.9317
A_15_P100194	-2.4978	-1.32066	2.4978	down	NM_001083818	chr5:70257951-70257180	zcchc8	Danio rerio zinc finger, CCHC domain containing 8 (zcchc8), mRNA [NM_001083818]	GO:0008270|GO:0003676	NM_001083818	Dr.17330	553372	ENSDART00000062373	zinc finger, CCHC domain containing 8	TC408192	346.799	1776.16	8.75642	10.0771
A_15_P752791	-2.04774	-1.03403	2.04774	down	NM_214722	chr15:42363169-42363110	ctsc	Danio rerio cathepsin C (ctsc), mRNA [NM_214722]	GO:0016787|GO:0006508|GO:0008233|GO:0008234	NM_214722	Dr.32463	368704	ENSDART00000022838	cathepsin C	TC446048	7480.82	21781.6	12.8055	13.8395
A_15_P178346	-3.28703	-1.71679	3.28703	down	NM_001020507	chr24:42246618-42246465	smyhc1	Danio rerio slow myosin heavy chain 1 (smyhc1), mRNA [NM_001020507]	GO:0030240|GO:0003774|GO:0000166|GO:0071688|GO:0031444|GO:0003779|GO:0016459|GO:0005524	NM_001020507	Dr.161747	321552		slow myosin heavy chain 1	TC382962	774.341	4549.94	9.80479	11.5216
A_15_P602382	-3.00729	-1.58846	3.00729	down	NM_200882	chr19:12760870-12760811	pabpc1b	Danio rerio poly A binding protein, cytoplasmic 1 b (pabpc1b), mRNA [NM_200882]	GO:0000166|GO:0003723|GO:0003676	NM_200882	Dr.99377	393856	ENSDART00000151056	poly A binding protein, cytoplasmic 1 b	TC438145	243.634	1570.61	8.3053	9.89377
A_15_P107016	-5.44008	-2.44363	5.44008	down	XM_005156308	chr12:28660297-28660356		Snf2-related CREBBP activator protein [Source:ZFIN;Acc:ZDB-GENE-041008-127] [ENSDART00000003080]		XM_005156308			ENSDART00000003080			42.0605	541.22	5.8829	8.32653
A_15_P721681	-2.94812	-1.5598	2.94812	down	NM_001130192	chr16:35417840-35417781	pnrc2	Danio rerio proline-rich nuclear receptor coactivator 2 (pnrc2), mRNA [NM_001130192]	GO:0006355|GO:0005737|GO:0000184|GO:0000932|GO:0005634|GO:0006351	NM_001130192	Dr.70123	565522	ENSDART00000138114	proline-rich nuclear receptor coactivator 2	TC432048	2555.23	11706.1	11.3465	12.9063
A_15_P401920	-3.16751	-1.66335	3.16751	down	NM_001013316	chr16:58456623-58456564	tmem222a	Danio rerio transmembrane protein 222a (tmem222a), mRNA [NM_001013316]	GO:0008150|GO:0003674|GO:0005575	NM_001013316	Dr.78557	503738	ENSDART00000078887	transmembrane protein 222a	TC372813	15.1573	107.971	4.39679	6.06014
A_15_P450945	-4.69175	-2.23013	4.69175	down	EH434236	chr21:19550754-19550695	si:ch211-22d5.2	si:ch211-22d5.2 [Source:ZFIN;Acc:ZDB-GENE-091204-283] [ENSDART00000114502]	GO:0004672|GO:0000166|GO:0004674|GO:0006468|GO:0005524|GO:0016772	XM_001337512	Dr.133049	797096	ENSDART00000114502	si:ch211-22d5.2	TC378023	8.63046	91.6068	3.58777	5.8179
A_15_P100448	-2.70853	-1.43751	2.70853	down	NM_199660	chr12:24837702-24837761	waca	Danio rerio WW domain containing adaptor with coiled-coil a (waca), mRNA [NM_199660]	GO:0006355|GO:0003682|GO:0000993|GO:0071894|GO:0005634|GO:0045893|GO:0010390|GO:0006974|GO:0006351|GO:0016568	NM_199660	Dr.78333	323904	ENSDART00000078896	WW domain containing adaptor with coiled-coil a	TC369208	879.049	4188.83	9.95945	11.397
A_15_P283441	-2.08048	-1.05692	2.08048	down	NM_213492	chr9:35933633-35933692	tfdp1a	Danio rerio transcription factor Dp-1, a (tfdp1a), mRNA [NM_213492]	GO:0005667|GO:0007049|GO:0006355|GO:0003700|GO:0005634|GO:0003677|GO:0006351	NM_213492	Dr.76249	406813	ENSDART00000011561	transcription factor Dp-1, a	TC416343	457.714	1913.79	9.12701	10.1839
A_15_P531417	-2.23634	-1.16114	2.23634	down	NM_213197	chr3:34322740-34322799	znf207a	Danio rerio zinc finger protein 207, a (znf207a), mRNA [NM_213197]	GO:0046872	NM_213197	Dr.75339	406478	ENSDART00000124631	zinc finger protein 207, a	TC370714	144.338	725.584	7.5959	8.75704
A_15_P722101	-4.72548	-2.24046	4.72548	down	NM_001081749	chr21:36427688-36430047	znf346	Danio rerio zinc finger protein 346 (znf346), mRNA [NM_001081749]	GO:0003725|GO:0005737|GO:0003723|GO:0008270|GO:0005634|GO:0003676|GO:0046872	NM_001081749	Dr.78181	560756	ENSDART00000085786	zinc finger protein 346	TC421386	43.8597	491.19	5.94406	8.18452
A_15_P141436	-2.46474	-1.30144	2.46474	down	NM_212634	chr15:18839800-18839859	alcamb	Danio rerio activated leukocyte cell adhesion molecule b (alcamb), mRNA [NM_212634]	GO:0031290|GO:0030424|GO:0016020|GO:0060385|GO:0021885|GO:0016021|GO:0042802	NM_212634	Dr.105054	323919	ENSDART00000101204	activated leukocyte cell adhesion molecule b	TC385556	4215.17	15434.6	12.0102	13.3117
A_15_P711031	-2.76475	-1.46715	2.76475	down	NM_199586	chr15:041495517-041495576	actn4	Danio rerio actinin, alpha 4 (actn4), mRNA [NM_199586]	GO:0005509|GO:0003779|GO:0051764|GO:0005575|GO:0051017	NM_199586	Dr.76952	322221	ENSDART00000128907	actinin, alpha 4	TC444038	854.572	4171.44	9.92391	11.3911
A_15_P186461	-2.36124	-1.23955	2.36124	down	NM_001083108	chr6:22747502-22747561	si:dkey-91f15.1	Danio rerio si:dkey-91f15.1 (si:dkey-91f15.1), mRNA [NM_001083108]	GO:0030054|GO:0007154|GO:0016020|GO:0005886|GO:0005921|GO:0005922|GO:0016021	NM_001083108	Dr.140256	100034658	ENSDART00000044519	si:dkey-91f15.1	TC398109	28.5269	155.594	5.32022	6.55977
A_15_P440175	-2.68907	-1.42711	2.68907	down	NM_001004513	chr1:46922075-46923661	tubgcp3	Danio rerio tubulin, gamma complex associated protein 3 (tubgcp3), mRNA [NM_001004513]	GO:0000922|GO:0005815|GO:0007020|GO:0000226|GO:0005856	NM_001004513	Dr.75354	563517	ENSDART00000042064	tubulin, gamma complex associated protein 3	TC370957	42.4302	269.751	5.89601	7.32312
A_15_P492837	-3.21136	-1.68318	3.21136	down	NM_001130610	chr6:51518553-51516627	rbl1	Danio rerio retinoblastoma-like 1 (p107) (rbl1), mRNA [NM_001130610]	GO:0051726|GO:0005634	NM_001130610	Dr.81201	795522	ENSDART00000073865	retinoblastoma-like 1 (p107)	TC366351	63.8437	479.059	6.46753	8.15071
A_15_P239856	-3.15045	-1.65556	3.15045	down	NM_213155	chr15:8914519-8914578	ap2s1	Danio rerio adaptor-related protein complex 2, sigma 1 subunit (ap2s1), mRNA [NM_213155]	GO:0008565|GO:0006810|GO:0016192|GO:0015031|GO:0006886|GO:0030117	NM_213155	Dr.76864	100148085	ENSDART00000033871	adaptor-related protein complex 2, sigma 1 subunit	TC450441	488.368	2940.48	9.20945	10.865
A_15_P182556	-3.04763	-1.60769	3.04763	down		chr19:32298743-32299720		ankyrin repeat and MYND domain containing 2b [Source:ZFIN;Acc:ZDB-GENE-060503-558] [ENSDART00000143494]					ENSDART00000143494		NP9494910	5.10133	35.1998	2.84451	4.45219
A_15_P243631	-2.32356	-1.21634	2.32356	down	EE692885	chr23:4719940-4719999	LOC100334106	Uncharacterized protein [Source:UniProtKB/TrEMBL;Acc:F1QCJ4] [ENSDART00000092344]		XM_002666415	Dr.158563	100334106	ENSDART00000092344	IQ motif and SEC7 domain-containing protein 1-like	TC399350	10.7577	56.0113	3.91156	5.1279
A_15_P582017	-2.6745	-1.41927	2.6745	down	XM_005164152	chr3:37660183-37660124	gpatch8	G patch domain containing 8 [Source:ZFIN;Acc:ZDB-GENE-030131-6966] [ENSDART00000108937]	GO:0003676|GO:0046872	XM_005164152		565404	ENSDART00000108937	G patch domain containing 8	TC383598	258.092	1475.1	8.37645	9.79572
A_15_P177321	-4.73552	-2.24352	4.73552	down	NM_199213	chr18:21447825-21447767	mbtps1	Danio rerio membrane-bound transcription factor protease, site 1 (mbtps1), mRNA [NM_199213]	GO:0006629|GO:0001889|GO:0005794|GO:0016787|GO:0004252|GO:0004175|GO:0051216|GO:0006508|GO:0008233	NM_199213	Dr.7917	326710	ENSDART00000114292	membrane-bound transcription factor protease, site 1	TC365828	34.9567	392.494	5.60749	7.85101
A_15_P236886	-3.35077	-1.74449	3.35077	down	NM_001002186	chr4:8763712-8761777	tspan9b	Danio rerio tetraspanin 9b (tspan9b), mRNA [NM_001002186]	GO:0008150|GO:0003674|GO:0016020|GO:0016021	NM_001002186	Dr.155620	431733	ENSDART00000067190	tetraspanin 9b	TC371093	47.0268	371.766	6.03394	7.77843
A_15_P183721	-2.10824	-1.07604	2.10824	down	NM_001214908	chr23:27375670-27375611	wu:fc13c02	Danio rerio wu:fc13c02 (wu:fc13c02), mRNA [NM_001214908]		NM_001214908	Dr.105596	561837	ENSDART00000079661	wu:fc13c02	TC383414	167.194	785.86	7.7983	8.87434
A_15_P649851	-2.46978	-1.30438	2.46978	down	NM_131397	chr3:26913673-26913732	hsp70	Danio rerio heat shock cognate 70-kd protein (hsp70), mRNA [NM_131397]	GO:0009408|GO:0000166|GO:0048593|GO:0009410|GO:0005524|GO:0046686	NM_131397	Dr.114305	30671	ENSDART00000109863	heat shock cognate 70-kd protein	TC375541	120.909	676.698	7.35032	8.6547
A_15_P542742	-4.5265	-2.1784	4.5265	down	XM_690165	chr11:11292997-11293165	ly75	lymphocyte antigen 75 [Source:ZFIN;Acc:ZDB-GENE-050309-166] [ENSDART00000026135]	GO:0008150|GO:0030246|GO:0005575	XM_690165		504036	ENSDART00000026135	lymphocyte antigen 75	TC431993	5	38.5406	2.40516	4.58356
A_15_P435860	-3.68828	-1.88295	3.68828	down	BC091934	chr9:49289269-49289222	col28a1a	Danio rerio cDNA clone IMAGE:7143418. [BC091934]			Dr.159585	100294690		collagen type XXVIII alpha 1 a	TC426857	1356.62	8213.07	10.5127	12.3957
A_15_P421845	-4.73903	-2.24459	4.73903	down	NM_001020637	chr19:32828166-32828107	zgc:111986	Danio rerio zgc:111986 (zgc:111986), mRNA [NM_001020637]	GO:0008150|GO:0003674	NM_001020637	Dr.140544	553664	ENSDART00000052183	zgc:111986	TC415632	864.594	7106.92	9.93604	12.1806
A_15_P184936	-9.86389	-3.30216	9.86389	down	XM_005160894	chr20:52126264-52126205		melanoma inhibitory activity family, member 3 [Source:ZFIN;Acc:ZDB-GENE-041014-270] [ENSDART00000041476]		XM_005160894			ENSDART00000041476		TC371348	19.4121	452.765	4.76423	8.06639
A_15_P416900	-2.2015	-1.13849	2.2015	down	DN897193	chr1:41074376-41074317		nap18f08.y1 Zebrafish anterior segment (minus lens). Unnormalized (nap) Danio rerio cDNA clone nap18f08 5', mRNA sequence [DN897193]		XM_003197690	Dr.155716				TC384528	79.9136	412.935	6.78562	7.92411
A_15_P412095	-5.58263	-2.48095	5.58263	down	EB890382	chr9:499029-499088		prostaglandin F2 receptor inhibitor [Source:HGNC Symbol;Acc:9601] [ENSDART00000112635]		XM_005169118	Dr.153868		ENSDART00000112635		TC455025	21.5464	283.827	4.91462	7.39557
A_15_P748251	-3.04581	-1.60682	3.04581	down	NM_001114580	chr6:11702952-11702893	march7	Danio rerio membrane-associated ring finger (C3HC4) 7 (march7), mRNA [NM_001114580]	GO:0008150|GO:0008270|GO:0005575	NM_001114580	Dr.162097	100136862	ENSDART00000129198	membrane-associated ring finger (C3HC4) 7	TC387589	89.2925	628.05	6.9348	8.54162
A_15_P101769	-2.08671	-1.06123	2.08671	down	NM_001045048	chr12:23990304-23990363	mfsd8	Danio rerio major facilitator superfamily domain containing 8 (mfsd8), mRNA [NM_001045048]	GO:0016020|GO:0006810|GO:0016021|GO:0005765|GO:0055085|GO:0005764	NM_001045048	Dr.76521	564342	ENSDART00000050074	major facilitator superfamily domain containing 8	TC367307	360.999	1552.45	8.81072	9.87195
A_15_P748991	-2.1797	-1.12413	2.1797	down	NM_200675	chr8:51210088-51210147	rer1	Danio rerio RER1 retention in endoplasmic reticulum 1 homolog (S. cerevisiae) (rer1), mRNA [NM_200675]	GO:0003674|GO:0016021	NM_200675	Dr.13426	393648	ENSDART00000060838	RER1 retention in endoplasmic reticulum 1 homolog (S. cerevisiae)	TC407088	1745.97	6144.32	10.8382	11.9624
A_15_P633526	-2.54951	-1.35022	2.54951	down	NM_213454	Zv9_NA966:973-914	tmem117	Danio rerio transmembrane protein 117 (tmem117), mRNA [NM_213454]	GO:0008150|GO:0003674|GO:0016020|GO:0016021	NM_213454	Dr.80618	406763		transmembrane protein 117	TC371381	31.6062	186.671	5.46426	6.81448
A_15_P218936	-2.58332	-1.36923	2.58332	down	NM_001144819	chr2:27689316-27689375	zswim5	Danio rerio zinc finger, SWIM-type containing 5 (zswim5), mRNA [NM_001144819]		NM_001144819	Dr.75738	100149522	ENSDART00000078305	zinc finger, SWIM-type containing 5	NP13326824	116.653	684.379	7.30268	8.6719
A_15_P116920	-5.96223	-2.57585	5.96223	down	NM_194412	chr13:37819958-37819899	ppp2r5eb	Danio rerio protein phosphatase 2, regulatory subunit B', epsilon isoform b (ppp2r5eb), mRNA [NM_194412]	GO:0007165|GO:0008601|GO:0000159	NM_194412	Dr.15883	373878	ENSDART00000123376	protein phosphatase 2, regulatory subunit B', epsilon isoform b	TC371273	269.496	3245.36	8.4352	11.0111
A_15_P380045	-2.85407	-1.51302	2.85407	down	CA473553	chr12:1117236-1116545	LOC100333761	Uncharacterized protein [Source:UniProtKB/TrEMBL;Acc:E7F4K5] [ENSDART00000088351]		XM_002663870	Dr.155892	100333761	ENSDART00000088351	c-Jun-amino-terminal kinase-interacting protein 4-like	TC384040	24.5373	161.934	5.10529	6.61831
A_15_P719661	-5.63889	-2.49541	5.63889	down	NM_213192	chr24:12824781-12824722	pck2	Danio rerio phosphoenolpyruvate carboxykinase 2 (mitochondrial) (pck2), mRNA [NM_213192]	GO:0004611|GO:0004613|GO:0006094|GO:0017076|GO:0005525	NM_213192	Dr.132490	406473	ENSDART00000024084	phosphoenolpyruvate carboxykinase 2 (mitochondrial)	TC419928	330.616	3656.86	8.69695	11.1924
A_15_P274621	-2.58195	-1.36846	2.58195	down	NM_001128534	chr5:28032134-28032075	arvcfb	Danio rerio armadillo repeat gene deleted in velocardiofacial syndrome b (arvcfb), mRNA [NM_001128534]		NM_001128534	Dr.77921	564669	ENSDART00000088222	armadillo repeat gene deleted in velocardiofacial syndrome b	TC392452	26.2006	157.075	5.20347	6.57193
A_15_P309531	-3.28589	-1.71629	3.28589	down	XM_002666910	chr25:35512662-35512352		Uncharacterized protein [Source:UniProtKB/TrEMBL;Acc:E7F7S3] [ENSDART00000128366]		XM_002666910			ENSDART00000128366		TC407700	25.7635	197.606	5.17555	6.89184
A_15_P108776	-2.10344	-1.07275	2.10344	down	NM_001122749	chr5:26200153-26200212	dgcr8	Danio rerio DiGeorge syndrome critical region gene 8 (dgcr8), mRNA [NM_001122749]		NM_001122749	Dr.78349	563963	ENSDART00000144560	DiGeorge syndrome critical region gene 8	TC366545	481.142	2007.02	9.18804	10.2608
A_15_P335019	-6.11456	-2.61225	6.11456	down	NM_001128327	chr11:25759145-25764989	kdm5ba	Danio rerio lysine (K)-specific demethylase 5Ba (kdm5ba), mRNA [NM_001128327]	GO:0005622|GO:0016706|GO:0008270|GO:0005634|GO:0003677|GO:0046872|GO:0055114	NM_001128327	Dr.5145	327168	ENSDART00000135443	lysine (K)-specific demethylase 5Ba	TC365719	7.76456	106.968	3.43207	6.04432
A_15_P709781	-2.40141	-1.26388	2.40141	down	NM_199987	chr20:15558927-15558986	jun	Danio rerio jun proto-oncogene (jun), mRNA [NM_199987]	GO:0043565|GO:0005667|GO:0006355|GO:0003700|GO:0051597|GO:0008013|GO:0005634|GO:0060070|GO:0003677|GO:0046686	NM_199987	Dr.1064	335916	ENSDART00000063912	jun proto-oncogene	TC396349	237.628	1227.32	8.27186	9.53574
A_15_P509002	-3.68705	-1.88247	3.68705	down	NM_001123255	chr8:43308469-43308410	rnf10	Danio rerio ring finger protein 10 (rnf10), mRNA [NM_001123255]	GO:0008270|GO:0046872	NM_001123255	Dr.76641	560444	ENSDART00000108518	ring finger protein 10	TC423112	262.744	2030.32	8.39664	10.2791
A_15_P105446	-3.7139	-1.89293	3.7139	down	NM_001044353	chr17:30525920-30527493	lpin1	Danio rerio lipin 1 (lpin1), mRNA [NM_001044353]	GO:0008150|GO:0003674|GO:0005575	NM_001044353	Dr.19055	799099	ENSDART00000104257	lipin 1	TC367297	17.4846	148.82	4.60776	6.5007
A_15_P715758	-2.74181	-1.45513	2.74181	down		chr3:007962957-007963016		GB							NP13317981	9.18099	56.3017	3.67888	5.13401
A_15_P363505	-2.57679	-1.36558	2.57679	down	NM_001002651	chr5:22645186-22645245	limk2	Danio rerio LIM domain kinase 2 (limk2), mRNA [NM_001002651]	GO:0016310|GO:0004672|GO:0016301|GO:0008270|GO:0006468|GO:0005575|GO:0005524|GO:0046872|GO:0016740|GO:0016772	NM_001002651	Dr.76343	436924	ENSDART00000093185	LIM domain kinase 2	NP13229263	222.705	1235.14	8.17927	9.54485
A_15_P715326	-2.4227	-1.27661	2.4227	down	BC134175	chr19:7536932-7536991		si:ch73-367f21.4 [Source:ZFIN;Acc:ZDB-GENE-120214-27] [ENSDART00000104906]		XM_005159468	Dr.70272		ENSDART00000104906		TC429978	40.3111	228.879	5.81713	7.09374
A_15_P736056	-2.03062	-1.02192	2.03062	down	NM_001080080	chr4:13027321-13027379	pphln1	Danio rerio periphilin 1 (pphln1), mRNA [NM_001080080]	GO:0008150|GO:0003674|GO:0005575	NM_001080080	Dr.105296	790935	ENSDART00000067175	periphilin 1	TC413903	4468.1	13525.3	12.0995	13.1214
A_15_P382555	-2.15462	-1.10744	2.15462	down	EH439310	chr12:46227735-46227710		FDR103-P00022-DEPE-F_D01 FDR103 Danio rerio cDNA clone FDR103-P00022-BR_D01 5', mRNA sequence [EH439310]		XM_005169495	Dr.76465				TC393512	45.3554	229.226	5.9885	7.09593
A_15_P509757	-3.82215	-1.93439	3.82215	down	XM_005163292	chr2:12196905-12196964	arhgap21b	Rho GTPase activating protein 21b [Source:ZFIN;Acc:ZDB-GENE-030131-4944] [ENSDART00000091298]	GO:0005622|GO:0007165|GO:0005543|GO:0005096	XM_005163292		326745	ENSDART00000091298	Rho GTPase activating protein 21b	TC442980	225.959	1846.51	8.19894	10.1333
A_15_P729471	-2.84836	-1.51013	2.84836	down	EH582215	chr1:55492075-55492134	r3hcc1l	R3H domain and coiled-coil containing 1-like [Source:ZFIN;Acc:ZDB-GENE-030131-4156] [ENSDART00000122551]	GO:0004535|GO:0005737|GO:0000166|GO:0003723|GO:0005634|GO:0006402|GO:0046872	XM_685202	Dr.113710	561802	ENSDART00000122551	R3H domain and coiled-coil containing 1-like	TC379524	238.726	1464.68	8.27807	9.7882
A_15_P116654	-2.45471	-1.29555	2.45471	down	NM_001083068	chr19:17178270-17178211	lrp12	Danio rerio low density lipoprotein receptor-related protein 12 (lrp12), mRNA [NM_001083068]		NM_001083068	Dr.79113	100034487	ENSDART00000109024	low density lipoprotein receptor-related protein 12	TC365720	1305.29	5372.75	10.4721	11.7677
A_15_P214881	-2.21854	-1.14961	2.21854	down	NM_201062	chr10:25970649-25970590	cct8	Danio rerio chaperonin containing TCP1, subunit 8 (theta) (cct8), mRNA [NM_201062]	GO:0035095|GO:0005737|GO:0000166|GO:0006457|GO:0051082|GO:0044267|GO:0005524	NM_201062	Dr.75181	394037	ENSDART00000137619	chaperonin containing TCP1, subunit 8 (theta)	TC416789	3666.13	12294.5	11.8284	12.9781
A_15_P323001	-3.11927	-1.64121	3.11927	down	NM_213496	chr3:39598306-39600953	prpsap2	Danio rerio phosphoribosyl pyrophosphate synthetase-associated protein 2 (prpsap2), mRNA [NM_213496]	GO:0000287|GO:0004749|GO:0005575|GO:0009165	NM_213496	Dr.106367	406369	ENSDART00000134309	phosphoribosyl pyrophosphate synthetase-associated protein 2	TC432320	149.312	1042.33	7.64215	9.28335
A_15_P642281	-2.88793	-1.53004	2.88793	down	NM_001082998	chr17:41439102-41439161	fosl2	Danio rerio fos-like antigen 2 (fosl2), mRNA [NM_001082998]	GO:0043565|GO:0006355|GO:0003700|GO:0005634|GO:0003677	NM_001082998	Dr.10410	558921	ENSDART00000059480	fos-like antigen 2	TC366184	270.98	1658.82	8.44466	9.9747
A_15_P741031	-3.30815	-1.72603	3.30815	down	NM_214714	chr6:34886517-34888598	serbp1a	Danio rerio SERPINE1 mRNA binding protein 1a (serbp1a), mRNA [NM_214714]	GO:0008150|GO:0005575|GO:0003730	NM_214714	Dr.75208	335449	ENSDART00000113814	SERPINE1 mRNA binding protein 1a	TC409419	2818.68	14289.7	11.4754	13.2015
A_15_P651346	-2.36711	-1.24313	2.36711	down	NM_001128355	chr4:46424563-46424622	LOC794656	Danio rerio novel NACHT domain containing protein (LOC794656), mRNA [NM_001128355]		NM_001128355	Dr.148325	794656	ENSDART00000108511	novel NACHT domain containing protein	NP13317705	53.2213	294.981	6.20724	7.45036
A_15_P722416	-2.30435	-1.20436	2.30435	down	NM_201038	chr1:59998142-59998201	cdc37	Danio rerio cell division cycle 37 homolog (S. cerevisiae) (cdc37), mRNA [NM_201038]	GO:0007049|GO:0019901|GO:0051301	NM_201038	Dr.80218	394013	ENSDART00000058692	cell division cycle 37 homolog (S. cerevisiae)	TC391684	150.43	777.604	7.65397	8.85833
A_15_P621216	-2.88575	-1.52894	2.88575	down	NM_001077153	chr17:37960854-37960795	zfp36l1a	Danio rerio zinc finger protein 36, C3H type-like 1a (zfp36l1a), mRNA [NM_001077153]	GO:0046872	NM_001077153	Dr.76498	561280	ENSDART00000025853	zinc finger protein 36, C3H type-like 1a	TC392158	401.269	2306.14	8.95471	10.4837
A_15_P113230	-4.21952	-2.07708	4.21952	down	NM_213077	chr22:3884932-3884991	uhrf1	Danio rerio ubiquitin-like, containing PHD and RING finger domains, 1 (uhrf1), mRNA [NM_213077]	GO:0000792|GO:0000790|GO:0004842|GO:0006355|GO:0000791|GO:0016574|GO:0016874|GO:0005657|GO:0031100|GO:0005634|GO:0035064|GO:0000122|GO:0003677|GO:0046872|GO:0006351|GO:0051865|GO:0042393|GO:0010216|GO:0005737|GO:0007049|GO:0042787|GO:0002088|GO:0008270|GO:0016568	NM_213077	Dr.77703	406350	ENSDART00000122573	ubiquitin-like, containing PHD and RING finger domains, 1	TC401114	134.272	1269.14	7.50472	9.5818
A_15_P173571	-2.72488	-1.44619	2.72488	down	NM_001029963	chr23:39948368-39948309	ppp1r14c	Danio rerio protein phosphatase 1, regulatory (inhibitor) subunit 14C (ppp1r14c), mRNA [NM_001029963]	GO:0042325|GO:0005737	NM_001029963	Dr.109976	568055	ENSDART00000077082	protein phosphatase 1, regulatory (inhibitor) subunit 14C	TC371269	46.1983	296.138	6.01086	7.45705
A_15_P337750	-2.73632	-1.45224	2.73632	down	XR_117769	chr10:36627061-36626920	LOC100334020	Smg-6 homolog, nonsense mediated mRNA decay factor (C. elegans) [Source:ZFIN;Acc:ZDB-GENE-081107-52] [ENSDART00000108897]		XM_005172741	Dr.84021	100334020	ENSDART00000108897	telomerase-binding protein EST1A-like	TC388314	18.4882	115.374	4.69378	6.14602
A_15_P748381	-2.12227	-1.08561	2.12227	down	NM_213215	chr12:4742083-4742024	aldoab	Danio rerio aldolase a, fructose-bisphosphate, b (aldoab), mRNA [NM_213215]	GO:0004332|GO:0005575|GO:0003824|GO:0016829|GO:0006096	NM_213215	Dr.76452	406496	ENSDART00000042200	aldolase a, fructose-bisphosphate, b	TC414812	9478.55	28084.1	13.126	14.2117
A_15_P547952	-2.72679	-1.44721	2.72679	down	NM_001256225	chr17:23633702-23633761	slc18a2	Danio rerio solute carrier family 18 (vesicular monoamine), member 2 (slc18a2), mRNA [NM_001256225]	GO:0016021|GO:0015893|GO:0055085|GO:0015238	NM_001256225	Dr.110027	553304	ENSDART00000025466	solute carrier family 18 (vesicular monoamine), member 2	TC371772	53.3646	340.189	6.2105	7.65771
A_15_P120491	-2.13443	-1.09385	2.13443	down	NM_001003838	chr12:20286356-20286415	cby1	Danio rerio chibby homolog 1 (Drosophila) (cby1), mRNA [NM_001003838]		NM_001003838	Dr.117192	326875	ENSDART00000109541	chibby homolog 1 (Drosophila)	TC414767	156.333	748.337	7.70403	8.79788
A_15_P675851	-2.00726	-1.00523	2.00726	down	NM_200837	chr3:2105751-2105810	zgc:73359	Danio rerio zgc:73359 (zgc:73359), mRNA [NM_200837]	GO:0030553|GO:0004114|GO:0005575|GO:0007601	NM_200837	Dr.81929	393810		zgc:73359	TC388831	484.814	1933.57	9.19875	10.204
A_15_P628516	-2.11612	-1.08142	2.11612	down	NM_152248	chr6:28624839-28626705	tp63	Danio rerio tumor protein p63 (tp63), transcript variant alpha 2, mRNA [NM_152248]	GO:0003700|GO:0044212|GO:0010165|GO:0005634|GO:0046872|GO:0030425|GO:0005829|GO:0002039|GO:0043523|GO:0005737|GO:0034644|GO:0003690|GO:0006978|GO:0000785|GO:0010332|GO:0005667|GO:0006355|GO:0051262|GO:0006915|GO:0000122|GO:0007417|GO:0003677|GO:0006351|GO:0043565|GO:0003684|GO:0042771|GO:0007049|GO:0003682|GO:0031571|GO:0045892	NM_152248	Dr.32588	260407	ENSDART00000065137	tumor protein p63	TC371871	498.358	2080.97	9.23778	10.3192
A_15_P646833	-4.40799	-2.14012	4.40799	down	NM_212994	chr8:52009971-52009832	hnrnpk	Danio rerio heterogeneous nuclear ribonucleoprotein K (hnrnpk), mRNA [NM_212994]	GO:0019013|GO:0030529|GO:0003723|GO:0019012	NM_212994	Dr.106469	406267	ENSDART00000097919	heterogeneous nuclear ribonucleoprotein K	TC376249	2797.93	18751.4	11.4653	13.6054
A_15_P176816	-2.03769	-1.02694	2.03769	down	BC095780	chr8:18712538-18712516	rps8b	ribosomal protein S8b [Source:ZFIN;Acc:ZDB-GENE-050522-202] [ENSDART00000080014]	GO:0005622|GO:0000462|GO:0003735|GO:0022627|GO:0030529|GO:0005840|GO:0006412|GO:0006414			100000836	ENSDART00000080014	ribosomal protein S8b	TC373035	43.7068	209.477	5.9403	6.96724
A_15_P738026	-3.33951	-1.73964	3.33951	down	NM_001130192	chr16:35415523-35415509	pnrc2	Danio rerio proline-rich nuclear receptor coactivator 2 (pnrc2), mRNA [NM_001130192]	GO:0006355|GO:0005737|GO:0000184|GO:0000932|GO:0005634|GO:0006351	NM_001130192	Dr.70123	565522	ENSDART00000075326	proline-rich nuclear receptor coactivator 2	TC417567	952.532	5504.98	10.0671	11.8067
A_15_P535937	-3.28483	-1.71582	3.28483	down	NM_001161670	chr1:1971347-1971402	mbnl2	Danio rerio muscleblind-like 2 (Drosophila) (mbnl2), transcript variant 3, mRNA [NM_001161670]	GO:0048747|GO:0007507|GO:0007517|GO:0001654|GO:0009790|GO:0046872	NM_001161670	Dr.65436	560384	ENSDART00000122626	muscleblind-like 2 (Drosophila)	TC414027	10.8766	80.4574	3.92566	5.64148
A_15_P142886	-2.26584	-1.18004	2.26584	down	NM_001045202	chr20:25500312-25500371	pfas	Danio rerio phosphoribosylformylglycinamidine synthase (pfas), mRNA [NM_001045202]	GO:0004642|GO:0003824|GO:0006189	NM_001045202	Dr.77652	570437	ENSDART00000012581	phosphoribosylformylglycinamidine synthase	TC365929	1351.04	5093.26	10.5072	11.6873
A_15_P147016	-3.44882	-1.7861	3.44882	down	NM_001126398	chr5:43782859-43782800	fam222ba	Danio rerio family with sequence similarity 222, member Ba (fam222ba), mRNA [NM_001126398]		NM_001126398	Dr.53030	561123	ENSDART00000083770	family with sequence similarity 222, member Ba	TC397564	22.4398	179.063	4.97071	6.75681
A_15_P669526	-2.27174	-1.1838	2.27174	down	NM_001020694	chr6:59665451-59665392	wbp4	Danio rerio WW domain binding protein 4 (wbp4), mRNA [NM_001020694]	GO:0008270|GO:0005634|GO:0003676|GO:0046872	NM_001020694	Dr.78282	553723	ENSDART00000098247	WW domain binding protein 4		18.3821	95.0539	4.68316	5.86696
A_15_P722181	-6.28106	-2.65101	6.28106	down	NM_131204	chr15:28733982-28733668	serpinh1b	Danio rerio serpin peptidase inhibitor, clade H (heat shock protein 47), member 1b (serpinh1b), mRNA [NM_131204]	GO:0030162|GO:0010951|GO:0005737|GO:0004867|GO:0006950|GO:0005615	NM_131204	Dr.32911	30449	ENSDART00000145976	serpin peptidase inhibitor, clade H (heat shock protein 47), member 1b	TC402905	1287.46	13365.2	10.455	13.106
A_15_P718916	-6.71798	-2.74803	6.71798	down	NM_001159667	chr20:23378516-23380455	fryl	Danio rerio furry homolog-like (Drosophila) (fryl), mRNA [NM_001159667]		NM_001159667	Dr.53316	558173	ENSDART00000058522	furry homolog-like (Drosophila)	TC365505	5	57.0044	2.40516	5.15319
A_15_P754566	-5.14621	-2.36351	5.14621	down	NM_152972	chr10:16068099-16068158	lmnb1	Danio rerio lamin B1 (lmnb1), mRNA [NM_152972]	GO:0005882|GO:0005198	NM_152972	Dr.25051	195816	ENSDART00000141586	lamin B1	TC381207	473.203	4572.05	9.16673	11.5302
A_15_P767421	-5.04858	-2.33588	5.04858	down	NM_131860	chr14:31962214-31962206	gpc4	Danio rerio glypican 4 (gpc4), mRNA [NM_131860]	GO:0005515|GO:0030334|GO:0014812|GO:0005886|GO:0051216|GO:0005578|GO:0043395|GO:0031225|GO:0001702|GO:0009826|GO:0030166|GO:0060028|GO:0060026|GO:0042074|GO:0060027|GO:0008104|GO:0016020|GO:0030198|GO:0055002|GO:0003379	NM_131860	Dr.78935	118437		glypican 4	TC419247	20.6338	244.575	4.84926	7.18513
A_15_P380130	-2.55823	-1.35515	2.55823	down	NM_001004551	chr3:31849226-31849167	ccdc47	Danio rerio coiled-coil domain containing 47 (ccdc47), mRNA [NM_001004551]	GO:0003674|GO:0016020|GO:0016021	NM_001004551	Dr.79744	447812	ENSDART00000051542	coiled-coil domain containing 47	TC428737	250.601	1371.85	8.34187	9.69701
A_15_P105544	-4.01883	-2.00678	4.01883	down	NM_001039636	chr8:904154-904414	smyd1b	Danio rerio SET and MYND domain containing 1b (smyd1b), mRNA [NM_001039636]	GO:0071690|GO:0030239|GO:0008168|GO:0017022|GO:0030241|GO:0048769|GO:0042800|GO:0032259|GO:0051568|GO:0046872|GO:0016740	NM_001039636	Dr.40834	569027	ENSDART00000081421	SET and MYND domain containing 1b	TC374046	2776.29	17082.3	11.4533	13.4601
A_15_P294206	-2.15294	-1.10631	2.15294	down	NM_001076764	chr19:49866927-49866986	utp18	Danio rerio UTP18 small subunit (SSU) processome component homolog (yeast) (utp18), mRNA [NM_001076764]	GO:0008150|GO:0003674	NM_001076764	Dr.30950	767797	ENSDART00000111184	UTP18 small subunit (SSU) processome component homolog (yeast)	TC455657	153.848	743.239	7.68459	8.7909
A_15_P734706	-2.14638	-1.10191	2.14638	down	NM_212581	chr13:36291059-36291000	tacc3	Danio rerio transforming, acidic coiled-coil containing protein 3 (tacc3), mRNA [NM_212581]	GO:0008150|GO:0003674	NM_212581	Dr.78713	321283	ENSDART00000145884	transforming, acidic coiled-coil containing protein 3	TC408661	281.141	1285.91	8.49744	9.59935
A_15_P671176	-2.24989	-1.16986	2.24989	down		chr14:006468225-006468286										307.337	1454.23	8.60892	9.77878
A_15_P706552	-2.16932	-1.11724	2.16932	down	XM_003199971	chr14:51212173-51204878	LOC100536535	Uncharacterized protein [Source:UniProtKB/TrEMBL;Acc:E7EYW4] [ENSDART00000124192]		XM_003199971		100536535	ENSDART00000124192	zinc finger and SCAN domain-containing protein 2-like	TC414538	24.4317	121.071	5.09913	6.21637
A_15_P733256	-3.00214	-1.58599	3.00214	down	NM_199567	chr24:9094448-9092404	tgif1	Danio rerio TGFB-induced factor homeobox 1 (tgif1), mRNA [NM_199567]	GO:0043565|GO:0006355|GO:0048385|GO:0003700|GO:0021797|GO:0005634|GO:0003677|GO:0048854	NM_199567	Dr.139	321756	ENSDART00000082434	transforming growth factor-beta-induced factor 1	TC408418	454.161	2660.73	9.11621	10.7022
A_15_P132946	-5.76843	-2.52818	5.76843	down	AY576960	chr10:21866156-21866215	pcdh1g30	Danio rerio protocadherin cluster 1 gamma 30a (pcdh1g30) mRNA, complete cds, alternatively spliced. [AY576960]	GO:0016020|GO:0005886|GO:0005509|GO:0016021|GO:0007155|GO:0007156		Dr.52488	554014		protocadherin 1 gamma 30		5	48.9485	2.40516	4.93334
A_15_P653465	-2.13036	-1.0911	2.13036	down	NM_001135131	chr7:4590447-4590649	slc12a10.3	Danio rerio slc12a10.3 solute carrier family 12 (sodium/potassium/chloride transporters), member 10, tandem duplicate 3 (slc12a10.3), mRNA [NM_001135131]	GO:0005215|GO:0016020|GO:0015377|GO:0006810|GO:0016021|GO:0055085|GO:0006811	NM_001135131	Dr.87477	562763	ENSDART00000042955	slc12a10.3 solute carrier family 12 (sodium/potassium/chloride transporters), member 10, tandem duplicate 3	TC441049	18.8229	91.2179	4.72202	5.81312
A_15_P697841	-2.87251	-1.52231	2.87251	down	XM_002667747	chr18:4883392-4883333	LOC100331743	si:ch1073-139a18.1 [Source:ZFIN;Acc:ZDB-GENE-091204-5] [ENSDART00000136189]		XM_002667747		100331743	ENSDART00000136189	NAD(P) transhydrogenase, mitochondrial-like	TC406310	98.2135	646.786	7.06344	8.58575
A_15_P582562	-2.66682	-1.41512	2.66682	down	NM_199842	chr6:53018648-53012120	gnai2b	Danio rerio guanine nucleotide binding protein (G protein), alpha inhibiting activity polypeptide 2b (gnai2b), mRNA [NM_199842]	GO:0001664|GO:0005834|GO:0003924|GO:0007214|GO:0031683|GO:0005525|GO:0007193|GO:0006184|GO:0007165|GO:0019001|GO:0000166|GO:0001973|GO:0007186|GO:0007188|GO:0004871	NM_199842	Dr.80461	327650	ENSDART00000079694	guanine nucleotide binding protein (G protein), alpha inhibiting activity polypeptide 2b	TC402202	397.548	2127.97	8.94276	10.3579
A_15_P515222	-2.12997	-1.09083	2.12997	down	NM_001113591	chr12:5803153-5800987	kif22	Danio rerio kinesin family member 22 (kif22), mRNA [NM_001113591]	GO:0008017|GO:0005515|GO:0001756|GO:0005874|GO:0048592|GO:0021952|GO:0005634|GO:0007409|GO:0003777|GO:0003677|GO:0005524|GO:0001966|GO:0005737|GO:0006281|GO:0000166|GO:0007420|GO:0005856|GO:0007018	NM_001113591	Dr.104844	561788	ENSDART00000114522	kinesin family member 22	TC405847	661.949	2645.85	9.60257	10.6934
A_15_P418640	-2.06761	-1.04797	2.06761	down	EE697538	chr25:35464558-35462768		AGENCOURT_90073624 NIH_ZGC_29 Danio rerio cDNA clone IMAGE:8815158 5', mRNA sequence [EE697538]		XM_002666751	Dr.157088				TC382383	528.759	2142.09	9.31997	10.3679
A_15_P485190	-3.05302	-1.61024	3.05302	down	NM_001077254	chr11:43468071-43463239	slmapa	Danio rerio sarcolemma associated protein a (slmapa), mRNA [NM_001077254]		NM_001077254	Dr.75428	572011	ENSDART00000104444	sarcolemma associated protein a	TC414891	56.9049	408.171	6.29768	7.90792
A_15_P758847	-3.85586	-1.94705	3.85586	down	XM_001920248	chr3:11578343-11578284		PREDICTED: Danio rerio butyrophilin subfamily 3 member A3-like (LOC799010), mRNA [XM_001920248]	GO:0008150|GO:0003674|GO:0005575	XM_001920248					TC386856	5	32.7666	2.40516	4.35222
A_15_P184011	-3.4995	-1.80715	3.4995	down	EH513239	chr23:45564003-45564062	si:ch73-269m23.5	glycolipid transfer protein domain containing 2 [Source:HGNC Symbol;Acc:33756] [ENSDART00000148669]	GO:0005737|GO:0051861|GO:0017089|GO:0046836	XM_001342187	Dr.91700	100002437	ENSDART00000148669	si:ch73-269m23.5	TC378904	12.6332	100.255	4.13584	5.94299
A_15_P747736	-2.69257	-1.42899	2.69257	down	NM_001110403	chr10:30758652-30758923	hspa8	Danio rerio heat shock protein 8 (hspa8), mRNA [NM_001110403]	GO:0031101|GO:0000166|GO:0006950|GO:0005524	NM_001110403	Dr.75087	573376	ENSDART00000132212	heat shock protein 8	TC410481	7677.35	29350.2	12.8447	14.2737
A_15_P338715	-2.62708	-1.39346	2.62708	down	NM_213062	chr23:20941376-20941516	uba1	Danio rerio ubiquitin-like modifier activating enzyme 1 (uba1), mRNA [NM_213062]	GO:0000166|GO:0016874|GO:0008641|GO:0003824|GO:0005524|GO:0006464	NM_213062	Dr.75314	406335	ENSDART00000054691	ubiquitin-like modifier activating enzyme 1	TC422977	174.853	1022.72	7.86378	9.25724
A_15_P338945	-3.95843	-1.98493	3.95843	down	NM_001194978	chr15:16330924-16331080	cltcb	Danio rerio clathrin, heavy polypeptide b (Hc) (cltcb), mRNA [NM_001194978]	GO:0030132|GO:0005198|GO:0030130|GO:0016192|GO:0006886	NM_001194978	Dr.38748	503600	ENSDART00000123172	clathrin, heavy polypeptide b (Hc)	TC381561	35.4088	329.754	5.62531	7.61024
A_15_P765751	-2.09625	-1.06781	2.09625	down	NM_131801	chr17:52273221-52275350	odc1	Danio rerio ornithine decarboxylase 1 (odc1), mRNA [NM_131801]	GO:0006596|GO:0003824|GO:0042462	NM_131801	Dr.78653	114426	ENSDART00000149807	ornithine decarboxylase 1	TC417136	578.249	2329.77	9.43266	10.5005
A_15_P185756	-3.41343	-1.77122	3.41343	down	NM_212972	chr4:932795-926296	mtpn	Danio rerio myotrophin (mtpn), mRNA [NM_212972]	GO:0048471|GO:0005737|GO:0005634	NM_212972	Dr.75187	406240	ENSDART00000077942	myotrophin	TC429654	601.41	3807.71	9.485	11.2562
A_15_P485965	-2.14644	-1.10194	2.14644	down	NM_200288	chr6:22655202-22655261	stk11ip	Danio rerio serine/threonine kinase 11 interacting protein (stk11ip), mRNA [NM_200288]	GO:0008150	NM_200288	Dr.84703	795019	ENSDART00000143248	serine/threonine kinase 11 interacting protein	TC417899	10.1633	48.913	3.82996	4.93191
A_15_P747161	-3.37525	-1.755	3.37525	down	NM_200003	chr5:38546430-38546373	h3f3c	Danio rerio H3 histone, family 3C (h3f3c), mRNA [NM_200003]		NM_200003	Dr.75577	336231		H3 histone, family 3C	TC444855	11033.5	51237.8	13.353	15.108
A_15_P104820	-5.22441	-2.38527	5.22441	down	NM_001020497	chr3:33099415-33099264	casp6	Danio rerio caspase 6, apoptosis-related cysteine peptidase (casp6), mRNA [NM_001020497]	GO:0004197|GO:0006508|GO:0006915|GO:0008234	NM_001020497	Dr.79640	552927	ENSDART00000050930	caspase 6, apoptosis-related cysteine peptidase	NP13225916	30.8305	380.369	5.42504	7.81031
A_15_P658656	-3.3843	-1.75886	3.3843	down	NM_131186	chr16:49386722-49386781	nr2f5	Danio rerio nuclear receptor subfamily 2, group F, member 5 (nr2f5), mRNA [NM_131186]	GO:0006355|GO:0003700|GO:0003707|GO:0005634|GO:0003677|GO:0006351|GO:0046872|GO:0043565|GO:0043401|GO:0008270|GO:0004879|GO:0032526|GO:0007601|GO:0050896	NM_131186	Dr.22	30427	ENSDART00000040769	nuclear receptor subfamily 2, group F, member 5	TC374067	425.614	2818.85	9.03502	10.7939
A_15_P731746	-17.4359	-4.12399	17.4359	down	NM_001126461	chr9:23667629-23667890	etv5a	Danio rerio ets variant 5a (etv5a), mRNA [NM_001126461]	GO:0043565|GO:0006355|GO:0003700|GO:0005634|GO:0035108|GO:0003677	NM_001126461	Dr.11545	337626	ENSDART00000101770	ets variant 5a	TC434729	6.13879	249.308	3.08936	7.21335
A_15_P734816	-2.54946	-1.35019	2.54946	down	NM_001014295	chr11:23200016-23199957	tmem183a	Danio rerio transmembrane protein 183A (tmem183a), mRNA [NM_001014295]	GO:0008150|GO:0003674|GO:0005575	NM_001014295	Dr.78611	541482	ENSDART00000146873	transmembrane protein 183A	TC401725	264.573	1433.58	8.40855	9.75874
A_15_P384040	-2.42154	-1.27593	2.42154	down	XM_002667435	chr25:2946120-2947808	LOC798275	Uncharacterized protein [Source:UniProtKB/TrEMBL;Acc:E7F004] [ENSDART00000115280]		XM_002667435		798275	ENSDART00000115280	neogenin-like	TC410998	19.3602	106.333	4.75943	6.03536
A_15_P102116	-6.17813	-2.62717	6.17813	down	CA495820	chr8:46455326-46456721		AGENCOURT_10812115 NCI_CGAP_ZEmb2 Danio rerio cDNA clone IMAGE:6788884 5', mRNA sequence [CA495820]		XM_005167264	Dr.156428				TC409065	5	52.4442	2.40516	5.03233
A_15_P591502	-3.33389	-1.73721	3.33389	down	XM_005157713	chr15:30160635-30160576		Rep: Neurofibromatosis type 1 - Fugu rubripes (Japanese pufferfish) (Takifugu rubripes), partial (97%) [TC385968]	GO:0001656|GO:0005515|GO:0008017|GO:0008603|GO:0009408|GO:0010181|GO:0006801|GO:0008016|GO:0048593|GO:0046578|GO:0042992|GO:0042803|GO:0042066|GO:0007243|GO:0006118|GO:0007406|GO:0006809|GO:0007507|GO:0043525|GO:0000165|GO:0030199|GO:0021897|GO:0019717|GO:0006979|GO:0042742|GO:0007614|GO:0045685|GO:0014069|GO:0014065|GO:0048485|GO:0001649|GO:0048384|GO:0001889|GO:0043234|GO:0004517|GO:0032320|GO:…	XM_005157713					TC385968	308.22	2116.03	8.61194	10.3491
A_15_P105589	-2.22448	-1.15347	2.22448	down	NM_001082940	chr6:32398330-32398270	mafa	Danio rerio v-maf musculoaponeurotic fibrosarcoma oncogene homolog A (avian) (mafa), mRNA [NM_001082940]	GO:0043565|GO:0006355|GO:0003700|GO:0005634|GO:0003677|GO:0006351	NM_001082940	Dr.83037	100000492	ENSDART00000064833	v-maf musculoaponeurotic fibrosarcoma oncogene homolog A (avian)	TC367938	250.178	1192.3	8.33813	9.4916
A_15_P742486	-2.15406	-1.10706	2.15406	down	NM_152971	chr16:32826960-32826901	lmna	Danio rerio lamin A (lmna), mRNA [NM_152971]	GO:0005882|GO:0060047|GO:0005198|GO:0090342	NM_152971	Dr.10311	195815	ENSDART00000024919	lamin A	TC426447	46.7775	235.764	6.02687	7.13392
A_15_P160581	-2.94521	-1.55837	2.94521	down	NM_001045064	chr11:26373248-26371469	hcfc1a	Danio rerio host cell factor C1a (hcfc1a), mRNA [NM_001045064]	GO:0008150|GO:0005575	NM_001045064	Dr.78600	564853	ENSDART00000014945	host cell factor C1a	TC365522	971.431	4968.79	10.093	11.6513
A_15_P164906	-2.3802	-1.25108	2.3802	down	NM_201305	chr15:1595099-1595040	kpna4	Danio rerio karyopherin alpha 4 (importin alpha 3) (kpna4), mRNA [NM_201305]	GO:0005737|GO:0008565|GO:0006810|GO:0005634|GO:0015031|GO:0006606	NM_201305	Dr.75173	327373	ENSDART00000125797	karyopherin alpha 4 (importin alpha 3)	TC442771	574.151	2609.96	9.42345	10.6745
A_15_P721211	-2.62188	-1.3906	2.62188	down	NM_200386	chr3:13607356-13607415	elof1	Danio rerio elongation factor 1 homolog (S. cerevisiae) (elof1), mRNA [NM_200386]	GO:0008150|GO:0003674|GO:0005575	NM_200386	Dr.76445	393357	ENSDART00000064025	elongation factor 1 homolog (S. cerevisiae)	TC393671	4123.68	16041	11.983	13.3736
A_15_P331599	-2.50201	-1.32308	2.50201	down	NM_001004552	chr3:36546185-36546155	pdxdc1	Danio rerio pyridoxal-dependent decarboxylase domain containing 1 (pdxdc1), mRNA [NM_001004552]	GO:0030170|GO:0016831|GO:0005575|GO:0003824|GO:0019752|GO:0016829	NM_001004552	Dr.36529	447813	ENSDART00000027092	pyridoxal-dependent decarboxylase domain containing 1	TC450706	112.912	644.536	7.25817	8.58126
A_15_P737006	-4.14857	-2.05261	4.14857	down	NM_201465	chr2:55852836-55852895	calrl	Danio rerio calreticulin like (calrl), mRNA [NM_201465]	GO:0006457|GO:0005783|GO:0005509|GO:0051082	NM_201465	Dr.105519	321315	ENSDART00000025570	calreticulin like	TC402556	665.588	4995.75	9.6079	11.6605
A_15_P654526	-2.82674	-1.49914	2.82674	down	NM_001144131	chr5:31256100-31256041	grin1b	Danio rerio glutamate receptor, ionotropic, N-methyl D-aspartate 1b (grin1b), mRNA [NM_001144131]	GO:0005215|GO:0030054|GO:0005886|GO:0005234|GO:0045202|GO:0016020|GO:0045211|GO:0004970|GO:0006810|GO:0004872|GO:0016021|GO:0005216|GO:0006811	NM_001144131	Dr.83363	100005675	ENSDART00000121839	glutamate receptor, ionotropic, N-methyl D-aspartate 1b	TC368003	5	24.2677	2.40516	3.9043
A_15_P374769	-2.42304	-1.27682	2.42304	down	XM_001339219	chr4:60847664-60847723	LOC798827	PREDICTED: Danio rerio membrane-spanning 4-domains subfamily A member 4A-like (LOC798827), mRNA [XM_001339219]		XM_001339219		798827		membrane-spanning 4-domains subfamily A member 4A-like		69.0908	394.514	6.58184	7.85866
A_15_P589432	-2.47466	-1.30723	2.47466	down	XR_117895	chr18:48897191-48897032	LOC100329706	PREDICTED: Danio rerio ATP-binding cassette sub-family C member 8-like (LOC100329706), miscRNA [XR_117895]		XR_117895	Dr.103663	100329706		ATP-binding cassette sub-family C member 8-like		5	21.5308	2.40516	3.71239
A_15_P118636	-3.15227	-1.65639	3.15227	down	NM_200094	chr8:37674583-37675344	sf3a1	Danio rerio splicing factor 3a, subunit 1 (sf3a1), mRNA [NM_200094]	GO:0006396|GO:0003723	NM_200094	Dr.28440	796388	ENSDART00000061378	splicing factor 3a, subunit 1	TC402498	217.664	1484.72	8.1497	9.80609
A_15_P182986	-2.98	-1.57531	2.98	down	XM_005159795	chr19:47897721-47897780	nup153	nucleoporin 153 [Source:ZFIN;Acc:ZDB-GENE-030131-4581] [ENSDART00000039415]		XM_005159795		571621	ENSDART00000039415	nucleoporin 153kDa	TC382338	84.4917	583.546	6.85919	8.4345
A_15_P562527	-2.35854	-1.23789	2.35854	down	NM_200993	chr7:4275633-4274589	zgc:55733	Danio rerio zgc:55733 (zgc:55733), mRNA [NM_200993]	GO:0019013|GO:0000166|GO:0030529|GO:0003676|GO:0019012	NM_200993	Dr.81689	393968	ENSDART00000031255	zgc:55733	TC412188	571.475	2574.29	9.41781	10.6557
A_15_P392897	-5.08398	-2.34596	5.08398	down	NM_001123012	chr18:42782025-42781966	aplp2	Danio rerio amyloid beta (A4) precursor-like protein 2 (aplp2), mRNA [NM_001123012]	GO:0004867|GO:0046914|GO:0016021|GO:0008201	NM_001123012	Dr.81900	796801	ENSDART00000077125	amyloid beta (A4) precursor-like protein 2	TC423250	62.1379	734.648	6.42913	8.77509
A_15_P273136	-2.11858	-1.0831	2.11858	down	NM_001077253	chr16:23811973-23812032	gnl1	Danio rerio guanine nucleotide binding protein-like 1 (gnl1), mRNA [NM_001077253]	GO:0006184|GO:0042254|GO:0003924|GO:0005525|GO:0005829	NM_001077253	Dr.85251	568505	ENSDART00000088513	guanine nucleotide binding protein-like 1	TC439730	41.2991	204.727	5.85498	6.93808
A_15_P673041	-2.31971	-1.21395	2.31971	down	XM_679135	chr1:45108947-45108888	si:dkey-28b4.8	si:dkey-28b4.8 [Source:ZFIN;Acc:ZDB-GENE-090501-2] [ENSDART00000133210]	GO:0019829|GO:0005388|GO:0016787|GO:0016020|GO:0000166|GO:0006816|GO:0016021|GO:0005524|GO:0046872|GO:0006812	XM_679135		562640	ENSDART00000133210	si:dkey-28b4.8	TC409200	357.851	1701.07	8.79972	10.0137
A_15_P661691	-4.96473	-2.31171	4.96473	down	BC151990	chr18:2408788-2408729	zgc:171915	leucine-rich repeats and calponin homology (CH) domain containing 3 [Source:HGNC Symbol;Acc:28637] [ENSDART00000112658]	GO:0008150|GO:0005575		Dr.102067	100126105	ENSDART00000112658	zgc:171915	TC374948	5.9581	65.9954	3.05697	5.36868
A_15_P664201	-2.47163	-1.30546	2.47163	down	NM_213358	chr1:055289600-055289917	pi4k2a	Danio rerio phosphatidylinositol 4-kinase type 2 alpha (pi4k2a), mRNA [NM_213358]	GO:0004430|GO:0043005|GO:0030054|GO:0005886|GO:0045202|GO:0042995|GO:0030425|GO:0005739|GO:0005737|GO:0000166|GO:0016301|GO:0016773|GO:0043025|GO:0035651|GO:0031410|GO:0005524|GO:0016310|GO:0042734|GO:0035838|GO:0016020|GO:0031083|GO:0044231|GO:0016023|GO:0045121|GO:0016740|GO:0005768	NM_213358	Dr.79494	406667	ENSDART00000130675	phosphatidylinositol 4-kinase type 2 alpha	TC374177	42.9294	249.865	5.91095	7.21642
A_15_P276496	-2.25797	-1.17502	2.25797	down	NM_001109770	chr22:31393385-31393444	LOC793439	Danio rerio tumor protein p53 binding protein, 2-like (LOC793439), mRNA [NM_001109770]		NM_001109770	Dr.120226	793439	ENSDART00000136032	tumor protein p53 binding protein, 2-like	TC366696	10.6984	54.0141	3.9043	5.07933
A_15_P722966	-2.89622	-1.53417	2.89622	down	NM_001110403	chr10:30758642-30758701	hspa8	Danio rerio heat shock protein 8 (hspa8), mRNA [NM_001110403]	GO:0031101|GO:0000166|GO:0006950|GO:0005524	NM_001110403	Dr.75087	573376	ENSDART00000132212	heat shock protein 8	TC417120	10080.6	41192	13.2156	14.7498
A_15_P182796	-2.16978	-1.11755	2.16978	down	XM_001339251	Zv9_NA399:58193-76923	LOC798868	dynein, cytoplasmic 1, intermediate chain 1 [Source:HGNC Symbol;Acc:2963] [ENSDART00000039186]		XM_001339251		798868	ENSDART00000039186	cytoplasmic dynein 1 intermediate chain 1-like	TC435588	36.4856	184.068	5.67673	6.79428
A_15_P167631	-2.1434	-1.0999	2.1434	down	NM_001002177	chr18:8301615-8301674	impdh1a	Danio rerio inosine 5'-phosphate dehydrogenase 1a (impdh1a), mRNA [NM_001002177]	GO:0005737|GO:0006177|GO:0030554|GO:0003938|GO:0016491|GO:0005634|GO:0003824|GO:0046872|GO:0055114|GO:0006164	NM_001002177	Dr.82849	431724	ENSDART00000101161	inosine 5'-phosphate dehydrogenase 1a	NP13226371	442.987	1917.37	9.08632	10.1862
A_15_P107567	-2.81038	-1.49076	2.81038	down	NM_001030262	chr15:16062499-16062558	plin2	Danio rerio perilipin 2 (plin2), mRNA [NM_001030262]	GO:0008150|GO:0003674|GO:0005575	NM_001030262	Dr.77358	794841	ENSDART00000129407	perilipin 2	NP13225768	22.6981	146.351	4.98768	6.47844
A_15_P220976	-3.73203	-1.89996	3.73203	down	NM_001013527	chr14:4230100-4227380	enpp6	Danio rerio ectonucleotide pyrophosphatase/phosphodiesterase 6 (enpp6), mRNA [NM_001013527]	GO:0016042|GO:0006629|GO:0008081|GO:0016787|GO:0016020|GO:0005886|GO:0008152|GO:0047390|GO:0031225|GO:0003824|GO:0019695	NM_001013527	Dr.81368	791915	ENSDART00000059231	ectonucleotide pyrophosphatase/phosphodiesterase 6	TC370376	5	31.7508	2.40516	4.30512
A_15_P158926	-3.16507	-1.66224	3.16507	down	NM_001100003	chr4:11384858-11384799	LOC561494	Danio rerio uncharacterized LOC561494 (LOC561494), mRNA [NM_001100003]		NM_001100003		561494	ENSDART00000081089	uncharacterized LOC561494	TC388967	7.7589	54.5336	3.43103	5.09327
A_15_P181246	-2.8883	-1.53022	2.8883	down		chr21:39174477-39174418		cholinergic receptor, nicotinic, alpha 10 (neuronal) [Source:HGNC Symbol;Acc:13800] [ENSDART00000012037]					ENSDART00000012037			5	24.7598	2.40516	3.93539
A_15_P519682	-6.76756	-2.75863	6.76756	down	XM_001332682	chr12:20026021-20025962		E1A binding protein p300 a [Source:ZFIN;Acc:ZDB-GENE-080403-16] [ENSDART00000149691]		XM_001332682			ENSDART00000149691		TC382881	17.2261	273.07	4.58332	7.34195
A_15_P468005	-6.44029	-2.68713	6.44029	down	JQ776648	chr16:9839382-9839323	cobl	cordon-bleu homolog (mouse) [Source:ZFIN;Acc:ZDB-GENE-091020-11] [ENSDART00000123710]	GO:0001947|GO:0005737|GO:0016020|GO:0005886|GO:0003146|GO:0060271|GO:0060088|GO:0003779|GO:0042995|GO:0005856|GO:0001726|GO:0005829	XM_005157875	Dr.83392	497312	ENSDART00000123710	cordon-bleu homolog (mouse)	TC397578	7.49236	108.23	3.37729	6.06442
A_15_P639661	-7.93353	-2.98796	7.93353	down	NM_212706	chr15:16185661-16185602	cul5a	Danio rerio cullin 5a (cul5a), mRNA [NM_212706]	GO:0031461|GO:0006511|GO:0031625	NM_212706	Dr.79316	327215	ENSDART00000101718	cullin 5a	TC423929	5.29778	96.2395	2.89863	5.8866
A_15_P283156	-3.46153	-1.79141	3.46153	down	NM_200997	chr9:6456203-6441181	nck2a	Danio rerio NCK adaptor protein 2a (nck2a), mRNA [NM_200997]	GO:0005575	NM_200997	Dr.80366	393972	ENSDART00000102672	NCK adaptor protein 2a	TC368102	24.2176	195.111	5.08384	6.87525
A_15_P278676	-7.58441	-2.92304	7.58441	down	AW305838			fj63f08.y1 zebrafish adult brain Danio rerio cDNA 5' similar to SW:SYTC_HUMAN P26639 THREONYL-TRNA SYNTHETASE, CYTOPLASMIC ;contains element TAR1 repetitive element ;, mRNA sequence [AW305838]			Dr.150742				TC408716	5.99647	102.911	3.06419	5.98723
A_15_P204591	-2.04028	-1.02877	2.04028	down	XM_005158268	chr16:44059166-44059107		copine IV [Source:HGNC Symbol;Acc:2317] [ENSDART00000052853]		XM_005158268			ENSDART00000052853		TC393329	38.4611	182.468	5.75407	6.78284
A_15_P632406	-2.24062	-1.1639	2.24062	down	NM_001007200	chr9:29979110-29976001	ptpn4a	Danio rerio protein tyrosine phosphatase, non-receptor type 4, a (ptpn4a), mRNA [NM_001007200]	GO:0008092|GO:0016791|GO:0005737|GO:0006470|GO:0016787|GO:0016311|GO:0004721|GO:0005856|GO:0004725	NM_001007200	Dr.96224	368448	ENSDART00000000670	protein tyrosine phosphatase, non-receptor type 4, a	TC367445	105.949	544.29	7.17202	8.33591
A_15_P156636	-2.02596	-1.01861	2.02596	down	NM_001159977	chr24:14714496-14714555	pi15a	Danio rerio peptidase inhibitor 15a (pi15a), mRNA [NM_001159977]	GO:0010466|GO:0005576|GO:0030414	NM_001159977	Dr.101444	561978	ENSDART00000012597	peptidase inhibitor 15a	TC381064	17.3934	78.9738	4.59842	5.61703
A_15_P761886	-5.43942	-2.44345	5.43942	down		chr22:8407419-8407478		Uncharacterized protein [Source:UniProtKB/TrEMBL;Acc:E7F1H2] [ENSDART00000110947]					ENSDART00000110947		NP13326544	9.39142	116.816	3.72196	6.16542
A_15_P649746	-3.49879	-1.80686	3.49879	down	NM_001005395	chr3:19934966-19934907	ubtf	Danio rerio upstream binding transcription factor, RNA polymerase I (ubtf), mRNA [NM_001005395]		NM_001005395	Dr.81029	368509	ENSDART00000056614	upstream binding transcription factor, RNA polymerase I	TC384892	172.254	1327.18	7.8425	9.64935
A_15_P541497	-2.07414	-1.05251	2.07414	down	NM_131885	chr7:39479453-39479394	cebpa	Danio rerio CCAAT/enhancer binding protein (C/EBP), alpha (cebpa), mRNA [NM_131885]	GO:0043565|GO:0030097|GO:0006355|GO:0003700|GO:0003677	NM_131885	Dr.78568	140815	ENSDART00000052366	CCAAT/enhancer binding protein (C/EBP), alpha	TC402050	196.961	903.275	8.02017	9.07268
A_15_P418555	-4.72248	-2.23954	4.72248	down	BC159251	chr13:53159538-53159597	pwwp2b	PWWP domain containing 2B [Source:ZFIN;Acc:ZDB-GENE-110930-2] [ENSDART00000089545]		XM_001920829	Dr.82270	561643	ENSDART00000089545	PWWP domain containing 2B	TC411115	10.4741	112.079	3.87096	6.11051
A_15_P739196	-3.78287	-1.91948	3.78287	down	NM_001014369	chr4:18044888-18044947	impdh1b	Danio rerio inosine 5'-phosphate dehydrogenase 1b (impdh1b), mRNA [NM_001014369]	GO:0005737|GO:0006177|GO:0030554|GO:0003938|GO:0016491|GO:0005634|GO:0003824|GO:0046872|GO:0055114|GO:0006164	NM_001014369	Dr.43252	338306	ENSDART00000066975	inosine 5'-phosphate dehydrogenase 1b	TC448769	383.708	2844.28	8.88772	10.8072
A_15_P223611	-2.72734	-1.44749	2.72734	down	NM_200211	chr7:23903254-23903313	fxr2	Danio rerio fragile X mental retardation, autosomal homolog 2 (fxr2), mRNA [NM_200211]	GO:0003723	NM_200211	Dr.132273	393180	ENSDART00000027718	fragile X mental retardation, autosomal homolog 2	TC366181	331.519	1864.72	8.70092	10.1484
A_15_P202311	-2.04389	-1.03132	2.04389	down	NM_001099417	chr17:25261948-25262007	zgc:165525	Danio rerio zgc:165525 (zgc:165525), mRNA [NM_001099417]	GO:0050662|GO:0005575|GO:0003824|GO:0044237	NM_001099417	Dr.134633	556781	ENSDART00000001691	zgc:165525	TC431468	5	18.0104	2.40516	3.43649
A_15_P226301	-3.41418	-1.77154	3.41418	down	NM_001079969	chr11:34665812-34667176	spoplb	Danio rerio speckle-type POZ protein-like b (spoplb), mRNA [NM_001079969]	GO:0016567|GO:0031463|GO:0043161|GO:0005634|GO:0031397	NM_001079969	Dr.85674	558170	ENSDART00000109418	speckle-type POZ protein-like b	TC426597	41.7333	337.335	5.87222	7.64376
A_15_P162711	-2.55648	-1.35416	2.55648	down	NM_001048149	chr6:52617055-52616996	sdc4	Danio rerio syndecan 4 (sdc4), mRNA [NM_001048149]	GO:0008092|GO:0033627|GO:0016477|GO:0016020|GO:0043149|GO:0042060|GO:0005546|GO:0055113|GO:0007155|GO:0005925	NM_001048149	Dr.74531	568593	ENSDART00000083830	syndecan 4	TC381808	1401.89	5917.45	10.5513	11.9055
A_15_P261266	-2.31517	-1.21112	2.31517	down	NM_199526	chr6:29746373-29746432	dlg1	Danio rerio discs, large (Drosophila) homolog 1 (dlg1), mRNA [NM_199526]	GO:0016323|GO:0016337|GO:0030054|GO:0019901|GO:0016020|GO:0045930|GO:0030866|GO:0019902|GO:0005783|GO:0001935|GO:0005789|GO:0007015	NM_199526	Dr.7949	114446	ENSDART00000024906	discs, large (Drosophila) homolog 1	TC387978	17.894	94.2501	4.64467	5.85579
A_15_P226781	-2.66834	-1.41594	2.66834	down	NM_213016	chr24:8068137-8065517	txndc5	Danio rerio thioredoxin domain containing 5 (txndc5), mRNA [NM_213016]	GO:0006662|GO:0015035|GO:0009055|GO:0045454|GO:0016853	NM_213016	Dr.25420	406289	ENSDART00000002394	thioredoxin domain containing 5	TC395082	47.0609	295.17	6.03536	7.4513
A_15_P159436	-2.47384	-1.30675	2.47384	down	XM_687050	chr4:17827702-17827507	si:dkeyp-15g12.1	si:dkeyp-15g12.1 [Source:ZFIN;Acc:ZDB-GENE-060503-87] [ENSDART00000101056]	GO:0005543	XM_687050	Dr.114690	563690	ENSDART00000101056	si:dkeyp-15g12.1	TC371561	13.534	74.4711	4.22902	5.53577
A_15_P396955	-2.18954	-1.13063	2.18954	down	NM_001122973	chr8:14972489-14972430	lhx4	Danio rerio LIM homeobox 4 (lhx4), mRNA [NM_001122973]	GO:0043565|GO:0006355|GO:0003700|GO:0008270|GO:0005634|GO:0003677|GO:0046872	NM_001122973	Dr.92005	571943	ENSDART00000057644	LIM homeobox 4	TC375745	29.638	149.133	5.37205	6.50268
A_15_P709807	-2.64604	-1.40383	2.64604	down	NM_212902	chr8:29519338-29519397	slc13a3	Danio rerio solute carrier family 13 (sodium-dependent dicarboxylate transporter), member 3 (slc13a3), mRNA [NM_212902]	GO:0005215|GO:0016020|GO:0006814|GO:0055085	NM_212902	Dr.88872	405838	ENSDART00000101159	solute carrier family 13 (sodium-dependent dicarboxylate transporter), member 3	TC366332	5.8774	34.9992	3.03836	4.4422
A_15_P416550	-2.64447	-1.40298	2.64447	down	NM_198840	chr13:17518407-17518465	znf503	Danio rerio zinc finger protein 503 (znf503), mRNA [NM_198840]	GO:0005515|GO:0006355|GO:0001076|GO:0006366|GO:0006357|GO:0007275|GO:0005634|GO:0003676|GO:0030902|GO:0048596|GO:0046872|GO:0006351	NM_198840	Dr.19893	324913	ENSDART00000008906	zinc finger protein 503	TC454904	239.104	1358.86	8.28057	9.68354
A_15_P163336	-4.51437	-2.17453	4.51437	down	NM_131292	chr8:21756370-21756429	col2a1a	Danio rerio collagen type II, alpha-1a (col2a1a), mRNA [NM_131292]	GO:0005581|GO:0030903|GO:0005201	NM_131292	Dr.75057	562496	ENSDART00000091307	collagen type II, alpha-1a	TC365595	2646	18273.3	11.3914	13.566
A_15_P734641	-3.41061	-1.77003	3.41061	down	NM_200276	chr5:43508513-43508454	ncor1	Danio rerio nuclear receptor co-repressor 1 (ncor1), mRNA [NM_200276]	GO:0003682|GO:0005634|GO:0009952|GO:0003677	NM_200276	Dr.40877	393246	ENSDART00000143573	nuclear receptor co-repressor 1	TC399496	9.65963	74.2603	3.76068	5.53071
A_15_P203692	-2.08305	-1.0587	2.08305	down	NM_001256219	chr16:3418887-3418828	si:dkey-288i20.1	Danio rerio si:dkey-288i20.1 (si:dkey-288i20.1), mRNA [NM_001256219]	GO:0006637|GO:0016790	NM_001256219	Dr.89815	553217	ENSDART00000081918	si:dkey-288i20.1	TC371301	14.8975	68.718	4.36858	5.42728
A_15_P434800	-4.33902	-2.11737	4.33902	down	NM_212988	chr1:24939139-24937495	pdcd4a	Danio rerio programmed cell death 4a (pdcd4a), mRNA [NM_212988]	GO:0005575	NM_212988	Dr.18414	406261	ENSDART00000030141	programmed cell death 4a	TC382298	666.414	5230.94	9.60926	11.7266
A_15_P206101	-2.56093	-1.35667	2.56093	down	NM_001045055	chr18:38967492-38967433	si:ch211-132b12.7	Danio rerio si:ch211-132b12.7 (si:ch211-132b12.7), mRNA [NM_001045055]		NM_001045055	Dr.81141	564531	ENSDART00000139042	si:ch211-132b12.7	TC373045	11.2079	63.9293	3.96278	5.31944
A_15_P225226	-2.12801	-1.0895	2.12801	down	NM_200922	chr25:20736691-20736632	dnm1l	Danio rerio dynamin 1-like (dnm1l), mRNA [NM_200922]	GO:0003374|GO:0000266|GO:0003924|GO:0005525|GO:0042803|GO:0005829|GO:0005739|GO:0006184|GO:0005737|GO:0000166|GO:0016020|GO:0016787|GO:0005777	NM_200922	Dr.77967	393896	ENSDART00000006840	dynamin 1-like	TC394187	183.121	866.371	7.92396	9.01346
A_15_P652531	-3.32016	-1.73125	3.32016	down	NM_001114430	chr5:10928162-10928221	slc2a11b	Danio rerio solute carrier family 2 (facilitated glucose transporter), member 11b (slc2a11b), mRNA [NM_001114430]	GO:0005215|GO:0016020|GO:0022891|GO:0022857|GO:0006810|GO:0016021|GO:0055085	NM_001114430	Dr.78347	564970	ENSDART00000092333	solute carrier family 2 (facilitated glucose transporter), member 11b	TC410197	5	28.3291	2.40516	4.13642
A_15_P131211	-3.59908	-1.84763	3.59908	down	DQ840157	chr15:22736762-22736703	kmt2a	lysine (K)-specific methyltransferase 2A [Source:ZFIN;Acc:ZDB-GENE-080521-3] [ENSDART00000148840]	GO:0035556|GO:0030097|GO:0048339|GO:0048823|GO:0008168|GO:0008270|GO:0005634|GO:0032259|GO:0003677|GO:0046872|GO:0016740	XM_005157583	Dr.87819	557048	ENSDART00000148840	lysine (K)-specific methyltransferase 2A	TC365339	16.5354	135.594	4.52066	6.36829
A_15_P741761	-2.39769	-1.26165	2.39769	down	NM_001001409	chr20:29509382-29508343	actc1a	Danio rerio actin, alpha, cardiac muscle 1a (actc1a), mRNA [NM_001001409]	GO:0005737|GO:0000166|GO:0003272|GO:0003203|GO:0005856|GO:0005524	NM_001001409	Dr.75935	408256	ENSDART00000114549	actin, alpha, cardiac muscle 1a	TC451193	10375.8	35010.8	13.2583	14.5199
A_15_P723586	-4.55554	-2.18762	4.55554	down	NM_001005392	chr17:26722977-26722918	rcan3	Danio rerio regulator of calcineurin family member 3 (rcan3), mRNA [NM_001005392]	GO:0019722|GO:0000166	NM_001005392	Dr.79356	325356	ENSDART00000050202	regulator of calcineurin family member 3	TC371754	14.3038	148.425	4.30897	6.49659
A_15_P155596	-2.11102	-1.07794	2.11102	down	EG576135	chr12:1294791-1294850		AGENCOURT_88114795 NIH_ZGC_26 Danio rerio cDNA clone IMAGE:8766837 5', mRNA sequence [EG576135]		XM_002663869	Dr.117094				NP13316725	57.2543	281.18	6.30603	7.38397
A_15_P732951	-2.69603	-1.43084	2.69603	down	NM_201454	chr2:21623817-21623758	rab2a	Danio rerio RAB2A, member RAS oncogene family (rab2a), mRNA [NM_201454]	GO:0000166|GO:0007264|GO:0015031|GO:0005525	NM_201454	Dr.76947	140617	ENSDART00000137538	RAB2A, member RAS oncogene family	NP13226157	1818.97	7845.54	10.8994	12.3303
A_15_P575062	-3.82586	-1.93578	3.82586	down	BC129248	chr19:5506222-5509416	LOC100149834	Danio rerio hypothetical LOC559027, mRNA (cDNA clone IMAGE:7059328), partial cds. [BC129248]		XM_003200531	Dr.135073	100149834	ENSDART00000093402	cdc2-related kinase, arginine/serine-rich-like	TC377778	61.114	545.185	6.40262	8.33841
A_15_P240331	-6.54222	-2.70978	6.54222	down	XM_679482	chr17:23045272-23045213	fam98a	family with sequence similarity 98, member A [Source:ZFIN;Acc:ZDB-GENE-091202-6] [ENSDART00000126525]		XM_679482		559900	ENSDART00000126525	family with sequence similarity 98, member A	TC388610	5	55.3901	2.40516	5.11494
A_15_P653846	-2.5707	-1.36216	2.5707	down	NM_199844	chr7:27743460-27743401	phf23b	Danio rerio PHD finger protein 23b (phf23b), mRNA [NM_199844]	GO:0008270|GO:0005575|GO:0046872	NM_199844	Dr.79487	100004597	ENSDART00000037087	PHD finger protein 23b	NP13228520	310.409	1668.67	8.62235	9.98451
A_15_P583427	-5.06176	-2.33964	5.06176	down	NM_001007348	chr23:36481287-36478515	csad	Danio rerio cysteine sulfinic acid decarboxylase (csad), mRNA [NM_001007348]	GO:0007507|GO:0030170|GO:0016831|GO:0005575|GO:0042412|GO:0003824|GO:0019752|GO:0016829	NM_001007348	Dr.108168	492476	ENSDART00000024354	cysteine sulfinic acid decarboxylase	TC410970	49.1051	581.935	6.09213	8.43177
A_15_P574792	-3.39483	-1.76334	3.39483	down	NM_001161375	chr17:45900881-45900822	arf6b	Danio rerio ADP-ribosylation factor 6b (arf6b), mRNA [NM_001161375]	GO:0005622|GO:0000166|GO:0007264|GO:0055113|GO:0005525	NM_001161375	Dr.76362	100003206	ENSDART00000074873	ADP-ribosylation factor 6b	TC384777	535.562	3436.56	9.33568	11.099
A_15_P144876	-3.06129	-1.61414	3.06129	down	NM_001123230	chr7:52641761-52641820	col4a5	Danio rerio collagen, type IV, alpha 5 (Alport syndrome) (col4a5), mRNA [NM_001123230]	GO:0031290|GO:0007412|GO:0005581|GO:0030198|GO:0005201	NM_001123230	Dr.77841	323561	ENSDART00000073827	collagen, type IV, alpha 5 (Alport syndrome)	TC421842	1574.95	7800.37	10.7066	12.3207
A_15_P432050	-2.26146	-1.17726	2.26146	down	NM_001137666	chr3:36724344-36724403	ppl	Danio rerio periplakin (ppl), mRNA [NM_001137666]	GO:0008150|GO:0003674|GO:0005575	NM_001137666	Dr.76314	449936	ENSDART00000055241	periplakin	TC412871	170.349	858.885	7.82257	8.99982
A_15_P118598	-7.93159	-2.98761	7.93159	down	NM_200241	chr12:8271301-8271242	ccdc6b	Danio rerio coiled-coil domain containing 6b (ccdc6b), mRNA [NM_200241]	GO:0008150|GO:0003674	NM_200241	Dr.79288	393211	ENSDART00000126219	coiled-coil domain containing 6b	TC367080	11.4227	210.921	3.99044	6.97805
A_15_P255930	-2.02552	-1.01829	2.02552	down	NM_001077575	chr7:56065828-56065769	trip4	Danio rerio thyroid hormone receptor interactor 4 (trip4), mRNA [NM_001077575]	GO:0006355|GO:0008270|GO:0005634	NM_001077575	Dr.87177	568585	ENSDART00000030273	thyroid hormone receptor interactor 4	TC370557	31.6141	147.061	5.46472	6.48302
A_15_P349235	-2.93248	-1.55212	2.93248	down	NM_001098180	chr25:6713012-6712953	sin3aa	Danio rerio SIN3 homolog A, transcription regulator (yeast) a (sin3aa), mRNA [NM_001098180]	GO:0003674|GO:0006355|GO:0005634	NM_001098180	Dr.79679	563090	ENSDART00000083539	SIN3 homolog A, transcription regulator (yeast) a	TC365540	64.7839	445.225	6.48754	8.03966
A_15_P664816	-4.70893	-2.2354	4.70893	down	BC095305	chr8:21788203-21788351	cry2a	cryptochrome 2a [Source:ZFIN;Acc:ZDB-GENE-010426-4] [ENSDART00000100222]	GO:0009266|GO:0006281|GO:0009416|GO:0003913	XM_005166892	Dr.116325	573209	ENSDART00000100222	cryptochrome 2a	TC400620	162.07	1675.18	7.75524	9.99064
A_15_P741466	-2.16988	-1.11762	2.16988	down	NM_213245	chr20:19068528-19068875	tdh	Danio rerio L-threonine dehydrogenase (tdh), mRNA [NM_213245]	GO:0050662|GO:0003824|GO:0044237	NM_213245	Dr.10250	406528	ENSDART00000152380	L-threonine dehydrogenase	TC380056	1794.91	6284.87	10.8784	11.996
A_15_P189681	-2.64118	-1.40118	2.64118	down	NM_001123317	chr8:31798163-31798104	si:ch211-251j10.3	Danio rerio si:ch211-251j10.3 (si:ch211-251j10.3), mRNA [NM_001123317]	GO:0005622|GO:0005085|GO:0051056|GO:0007165|GO:0007264	NM_001123317	Dr.144263	799483	ENSDART00000062181	si:ch211-251j10.3	TC368496	8.63615	50.8816	3.58891	4.99009
A_15_P578962	-2.64	-1.40054	2.64	down	NM_001122784	chr14:26173137-26172656	matr3l	Danio rerio matrin 3-like (matr3l), mRNA [NM_001122784]	GO:0000166|GO:0008270|GO:0005634|GO:0003676	NM_001122784	Dr.76817	556290	ENSDART00000000406	matrin 3-like	TC365931	103.352	625.988	7.13653	8.53707
A_15_P381335	-2.05072	-1.03613	2.05072	down	NM_001130610	chr6:51513731-51513672	rbl1	Danio rerio retinoblastoma-like 1 (p107) (rbl1), mRNA [NM_001130610]	GO:0051726|GO:0005634	NM_001130610	Dr.81201	795522	ENSDART00000073865	retinoblastoma-like 1 (p107)	TC366351	176.819	808.198	7.87837	8.9145
A_15_P102953	-2.60277	-1.38005	2.60277	down	NM_199869	chr7:43739062-43739003	insig1	Danio rerio insulin induced gene 1 (insig1), mRNA [NM_199869]	GO:0006629|GO:0016020|GO:0005783|GO:0005789|GO:0016021|GO:0008202|GO:0008203	NM_199869	Dr.115835	334189	ENSDART00000013785	insulin induced gene 1	TC372076	219.21	1230.8	8.16007	9.54012
A_15_P184586	-4.19556	-2.06886	4.19556	down	XM_005160848	chr20:39323400-39323850	scara3	scavenger receptor class A, member 3 [Source:ZFIN;Acc:ZDB-GENE-041014-317] [ENSDART00000146683]		XM_005160848		564588	ENSDART00000146683	scavenger receptor class A, member 3	TC371837	5	35.7281	2.40516	4.47403
A_15_P338985	-2.75801	-1.46363	2.75801	down	NM_201064	chr2:13754259-13754318	zgc:66475	Danio rerio zgc:66475 (zgc:66475), mRNA [NM_201064]	GO:0003904|GO:0006281|GO:0005575|GO:0003913	NM_201064	Dr.76607	394039	ENSDART00000077278	zgc:66475	TC413552	1316.79	6072.83	10.4805	11.9441
A_15_P344680	-5.2281	-2.38629	5.2281	down	NM_001114895	chr13:171801-171860	zgc:171534	Danio rerio zgc:171534 (zgc:171534), mRNA [NM_001114895]	GO:0008150	NM_001114895	Dr.52137	100141330	ENSDART00000102938	zgc:171534	TC368305	5	44.4982	2.40516	4.79145
A_15_P187316	-3.53681	-1.82245	3.53681	down	NM_205729	chr3:23785744-23785803	nr1d1	Danio rerio nuclear receptor subfamily 1, group d, member 1 (nr1d1), mRNA [NM_205729]	GO:0006355|GO:0003700|GO:0006366|GO:0003707|GO:0005634|GO:0003677|GO:0006351|GO:0046872|GO:0043565|GO:0001078|GO:0043401|GO:0008270|GO:0004887	NM_205729	Dr.85991	494487	ENSDART00000040468	nuclear receptor subfamily 1, group d, member 1	TC367416	5	30.0968	2.40516	4.22761
A_15_P742451	-6.32282	-2.66057	6.32282	down	NM_001114549	chr24:7780645-7780704	ptrfb	Danio rerio polymerase I and transcript release factor b (ptrfb), transcript variant 2, mRNA [NM_001114549]	GO:0030903	NM_001114549	Dr.156899	561082	ENSDART00000082467	polymerase I and transcript release factor b	TC373964	11.2424	162.908	3.96765	6.62822
A_15_P191046	-3.57921	-1.83964	3.57921	down	NM_213365	chr14:34259042-34257526	zgc:63637	Danio rerio zgc:63637 (zgc:63637), mRNA [NM_213365]	GO:0000166|GO:0007264|GO:0015031|GO:0005525	NM_213365	Dr.117991	406674	ENSDART00000138294	zgc:63637	TC398742	96.672	790.864	7.04364	8.88328
A_15_P235487	-3.60095	-1.84838	3.60095	down	EU117421	chr24:10878775-10882146	prlh2	Danio rerio C-RFamide peptide precursor, mRNA, complete cds. [EU117421]	GO:0005179	XM_005162607	Dr.154096	793765	ENSDART00000106288	prolactin releasing hormone 2	TC430958	6.42106	51.3351	3.15386	5.00223
A_15_P405625	-2.74609	-1.45738	2.74609	down	NM_001159668	chr13:49375451-49375510	fbxo11a	Danio rerio F-box protein 11a (fbxo11a), mRNA [NM_001159668]	GO:0004842|GO:0008270|GO:0005575	NM_001159668	Dr.15421	777607	ENSDART00000083989	F-box protein 11a	TC367460	416.343	2274.16	9.00377	10.4611
A_15_P762291	-2.21422	-1.1468	2.21422	down	NM_001003746	chr10:40032857-40032798	acat1	Danio rerio acetyl-Coenzyme A acetyltransferase 1 (acetoacetyl Coenzyme A thiolase) (acat1), mRNA [NM_001003746]	GO:0005739|GO:0016747|GO:0016746|GO:0008152|GO:0003985|GO:0003824|GO:0046872|GO:0016740	NM_001003746	Dr.77084	445290	ENSDART00000067448	acetyl-Coenzyme A acetyltransferase 1 (acetoacetyl Coenzyme A thiolase)	TC370582	459.112	2028.6	9.13057	10.2774
A_15_P160951	-2.06015	-1.04275	2.06015	down	NM_001020702	chr7:40096568-40096509	fbxo3	Danio rerio F-box protein 3 (fbxo3), mRNA [NM_001020702]	GO:0008150|GO:0003674|GO:0005575	NM_001020702	Dr.88346	553731	ENSDART00000047220	F-box protein 3	TC370217	205.014	928.17	8.07213	9.11488
A_15_P104383	-2.20628	-1.14161	2.20628	down	NM_001128722	chr5:14850444-14850385	LOC564840	Danio rerio purine-rich element binding protein B (LOC564840), mRNA [NM_001128722]		NM_001128722	Dr.116316	564840		purine-rich element binding protein B	TC448087	908.058	3545.96	10.0009	11.1425
A_15_P104548	-2.19605	-1.13491	2.19605	down	NM_213079	chr2:37731593-37731756	hnrnpc	Danio rerio heterogeneous nuclear ribonucleoprotein C (hnrnpc), mRNA [NM_213079]	GO:0019013|GO:0000166|GO:0030529|GO:0003676|GO:0019012	NM_213079	Dr.20495	406352	ENSDART00000135629	heterogeneous nuclear ribonucleoprotein C	TC392407	1090.26	4127.86	10.2391	11.374
A_15_P725891	-2.94012	-1.55588	2.94012	down	NM_200910	chr19:7913072-7912812	sdha	Danio rerio succinate dehydrogenase complex, subunit A, flavoprotein (Fp) (sdha), mRNA [NM_200910]	GO:0006099|GO:0050660|GO:0005743|GO:0008177|GO:0016627|GO:0005739|GO:0022904|GO:0016020|GO:0006105|GO:0006810|GO:0016491|GO:0000104|GO:0022900|GO:0055114	NM_200910	Dr.105233	393884	ENSDART00000081754	succinate dehydrogenase complex, subunit A, flavoprotein (Fp)	TC427303	282.411	1754.55	8.50277	10.0587
A_15_P187146	-2.49809	-1.32083	2.49809	down	XM_005163881	chr3:17378312-17378253	cnp	2',3'-cyclic nucleotide 3' phosphodiesterase [Source:ZFIN;Acc:ZDB-GENE-030521-29] [ENSDART00000104299]	GO:0031103|GO:0016020|GO:0009214|GO:0004113|GO:0003824|GO:0005829	XM_005163881		325896	ENSDART00000104299	2',3'-cyclic nucleotide 3' phosphodiesterase	TC436293	558.034	2680.93	9.39148	10.7123
A_15_P740331	-2.97613	-1.57344	2.97613	down	NM_001100048	chr5:4144339-4144397	dhrs11a	Danio rerio dehydrogenase/reductase (SDR family) member 11a (dhrs11a), mRNA [NM_001100048]	GO:0008152|GO:0016491|GO:0005575	NM_001100048	Dr.134955	791578	ENSDART00000100097	dehydrogenase/reductase (SDR family) member 11a	TC383924	23.2879	160.105	5.02772	6.60115
A_15_P505057	-3.95268	-1.98283	3.95268	down	NM_201066	chr4:17906881-17906254	cbll1	Danio rerio Cas-Br-M (murine) ecotropic retroviral transforming sequence-like 1 (cbll1), mRNA [NM_201066]	GO:0008270|GO:0003676|GO:0046872	NM_201066	Dr.80478	394041	ENSDART00000140722	Cas-Br-M (murine) ecotropic retroviral transforming sequence-like 1	TC400355	44.2843	417.678	5.95556	7.93839
A_15_P116667	-2.07009	-1.04969	2.07009	down	CD595974	chr10:7327443-7322283	LOC793671	chondroitin sulfate N-acetylgalactosaminyltransferase 1 [Source:HGNC Symbol;Acc:24290] [ENSDART00000059322]		XM_001333443	Dr.151958	793671	ENSDART00000059322	chondroitin sulfate N-acetylgalactosaminyltransferase 1-like	TC403260	18.1547	84.9847	4.66604	5.71574
A_15_P239646	-2.10117	-1.07119	2.10117	down	EB932228	Zv9_NA266:26052-26111	toporsb	topoisomerase I binding, arginine/serine-rich b [Source:ZFIN;Acc:ZDB-GENE-110728-3] [ENSDART00000058174]		XM_003201632	Dr.158222	796087	ENSDART00000058174	topoisomerase I binding, arginine/serine-rich b	TC392403	33.5066	162.001	5.5478	6.61899
A_15_P190651	-4.96394	-2.31149	4.96394	down	NM_199897	chr14:23093937-23093996	slc43a1a	Danio rerio solute carrier family 43, member 1a (slc43a1a), mRNA [NM_199897]	GO:0072015|GO:0016021|GO:0055085	NM_199897	Dr.106021	334395	ENSDART00000054411	solute carrier family 43, member 1a	TC387824	242.396	2505.41	8.29926	10.6107
A_15_P760216	-5.51676	-2.46382	5.51676	down		chr11:23030095-23030036		GB							NP13321758	5	47.0005	2.40516	4.86899
A_15_P753241	-2.12642	-1.08842	2.12642	down	NM_001099265		si:ch211-284e20.8	Danio rerio si:ch211-284e20.8 (si:ch211-284e20.8), mRNA [NM_001099265]	GO:0004869	NM_001099265	Dr.92573	100093712	ENSDART00000132670	si:ch211-284e20.8	TC374510	9.00476	43.026	3.65538	4.7438
A_15_P181821	-2.4994	-1.32158	2.4994	down	XM_688606	chr19:7929630-7929689	sqleb	si:ch73-216m24.3 [Source:ZFIN;Acc:ZDB-GENE-100921-70] [ENSDART00000092408]	GO:0050660|GO:0008152|GO:0016491|GO:0004506|GO:0016021|GO:0055114	XM_688606		565329	ENSDART00000092408	squalene epoxidase b	NP9495276	14.0779	78.4285	4.28737	5.60896
A_15_P119802	-4.32872	-2.11394	4.32872	down	NM_001008583	chr20:35962439-35962498	cd2ap	Danio rerio CD2-associated protein (cd2ap), mRNA [NM_001008583]	GO:0003674|GO:0005575|GO:0032835	NM_001008583	Dr.78424	494040	ENSDART00000102611	CD2-associated protein	NP13228439	101.155	997.037	7.10595	9.21989
A_15_P105031	-3.45915	-1.79042	3.45915	down	NM_199619	chr24:20257972-20257913	csrnp1b	Danio rerio cysteine-serine-rich nuclear protein 1b (csrnp1b), mRNA [NM_199619]	GO:0003674|GO:0021536|GO:0030901|GO:0005575	NM_199619	Dr.2490	322795	ENSDART00000056082	cysteine-serine-rich nuclear protein 1b	TC373199	76.5636	617.684	6.72606	8.51648
A_15_P111986	-2.2716	-1.18371	2.2716	down	NM_001012373	chr6:43945611-43941134	rybpb	Danio rerio RING1 and YY1 binding protein b (rybpb), mRNA [NM_001012373]	GO:0006355|GO:0005737|GO:0006915|GO:0008270|GO:0005634|GO:0003677|GO:0046872|GO:0006351	NM_001012373	Dr.94863	497613	ENSDART00000075497	RING1 and YY1 binding protein b	NP13226231	39.0536	208.48	5.77591	6.95962
A_15_P146986	-3.0947	-1.6298	3.0947	down	NM_213075	chr5:44464215-44464156	flot2a	Danio rerio flotillin 2a (flot2a), mRNA [NM_213075]	GO:0003674|GO:0016020|GO:0030139|GO:0007155|GO:0005768	NM_213075	Dr.38212	245698	ENSDART00000003947	flotillin 2a	NP13228507	797.915	4385.92	9.83802	11.4678
A_15_P542747	-2.04426	-1.03158	2.04426	down	NM_001115058	chr1:12153904-12153845	pcdh18a	Danio rerio protocadherin 18a (pcdh18a), mRNA [NM_001115058]	GO:0016339|GO:0042074|GO:0016020|GO:0005886|GO:0005509|GO:0016021|GO:0055113|GO:0007155|GO:0007156	NM_001115058	Dr.83325	572532	ENSDART00000127838	protocadherin 18a	TC365721	55.0354	262.729	6.25168	7.28326
A_15_P243231	-7.9215	-2.98577	7.9215	down	XM_005170537	chr22:22492839-22492780	LOC100332608	C2 calcium-dependent domain containing 4C [Source:HGNC Symbol;Acc:29417] [ENSDART00000113168]		XM_005170537		100332608	ENSDART00000113168	C2 calcium-dependent domain-containing protein 4C-like	TC441054	5	67.0047	2.40516	5.39094
A_15_P632106	-2.87737	-1.52475	2.87737	down	NM_001039805	chr1:9639501-9639442	tnrc5	Danio rerio trinucleotide repeat containing 5 (tnrc5), mRNA [NM_001039805]	GO:0003674|GO:0005783|GO:0045087	NM_001039805	Dr.151531	550136	ENSDART00000040116	trinucleotide repeat containing 5	TC386424	34.5602	232.165	5.58852	7.11327
A_15_P320281	-2.13405	-1.09359	2.13405	down	NM_199633	chr15:30473103-30473044	wsb1	Danio rerio WD repeat and SOCS box-containing 1 (wsb1), mRNA [NM_199633]	GO:0035556|GO:0016567	NM_199633	Dr.33037	323226	ENSDART00000008854	WD repeat and SOCS box-containing 1	TC410505	112.47	548.441	7.25281	8.34641
A_15_P735191	-2.58621	-1.37084	2.58621	down	BC098870	chr6:42604637-42604696		RNA binding motif protein 6 [Source:HGNC Symbol;Acc:9903] [ENSDART00000097273]		XM_005166119	Dr.80780		ENSDART00000097273		TC397917	15.2005	88.8741	4.40119	5.77202
A_15_P375741	-2.26763	-1.18118	2.26763	down		chr13:3963589-3963530		Rep: Chromosome 17 SCAF14760, whole genome shotgun sequence - Tetraodon nigroviridis (Green puffer), partial (26%) [TC381593]							TC381593	2855.91	10005.8	11.493	12.6742
A_15_P600782	-2.38712	-1.25527	2.38712	down	NM_194373	chr3:10546438-10546497	cbx2	Danio rerio chromobox homolog 2 (Drosophila Pc class) (cbx2), mRNA [NM_194373]	GO:0005634|GO:0003677	NM_194373	Dr.78712	327291	ENSDART00000066053	chromobox homolog 2 (Drosophila Pc class)	TC444228	699.037	3069	9.67309	10.9284
A_15_P379435	-5.14643	-2.36357	5.14643	down	NM_131673	chr15:19335168-19335418	supt5h	Danio rerio suppressor of Ty 5 homolog (S. cerevisiae) (supt5h), mRNA [NM_131673]	GO:0030097|GO:0006368|GO:0006355|GO:0032044|GO:0006357|GO:0032784|GO:0032968|GO:0005634|GO:0034244|GO:0001764|GO:0006351	NM_131673	Dr.33072	64275	ENSDART00000062674	suppressor of Ty 5 homolog (S. cerevisiae)	TC381397	11.6782	137.109	4.01962	6.3832
A_15_P756196	-2.22371	-1.15297	2.22371	down	NM_131230	chr23:2449509-2452131	tcp1	Danio rerio t-complex polypeptide 1 (tcp1), mRNA [NM_131230]	GO:0005737|GO:0000166|GO:0006457|GO:0051082|GO:0070121|GO:0044267|GO:0005524	NM_131230	Dr.75910	30477	ENSDART00000126038	t-complex polypeptide 1	TC384481	5753.94	18609.8	12.4409	13.5939
A_15_P601667	-12.3247	-3.62348	12.3247	down	NM_199660	chr12:24794190-24794249	waca	Danio rerio WW domain containing adaptor with coiled-coil a (waca), mRNA [NM_199660]	GO:0006355|GO:0003682|GO:0000993|GO:0071894|GO:0005634|GO:0045893|GO:0010390|GO:0006974|GO:0006351|GO:0016568	NM_199660	Dr.78333	323904	ENSDART00000078896	WW domain containing adaptor with coiled-coil a	TC446362	7.40052	211.224	3.35668	6.98016
A_15_P154851	-5.93789	-2.56995	5.93789	down	NM_199586	Zv9_NA540:4035-3976	actn4	Danio rerio actinin, alpha 4 (actn4), mRNA [NM_199586]	GO:0005509|GO:0003779|GO:0051764|GO:0005575|GO:0051017	NM_199586	Dr.76952	322221	ENSDART00000032887	actinin, alpha 4	TC444038	74.2702	1018.77	6.68098	9.25093
A_15_P205671	-2.34509	-1.22965	2.34509	down	NM_001080802	chr15:21097765-21097706	scn3b	Danio rerio sodium channel, voltage-gated, type III, beta (scn3b), mRNA [NM_001080802]	GO:0006810|GO:0001518|GO:0006814|GO:0017080|GO:0006811	NM_001080802	Dr.151202	563935	ENSDART00000090120	sodium channel, voltage-gated, type III, beta	TC377112	15.8694	83.9741	4.46827	5.69791
A_15_P374680	-2.0753	-1.05332	2.0753	down	NM_001079995	chr2:7897786-7897845	chst2a	Danio rerio carbohydrate (N-acetylglucosamine-6-O) sulfotransferase 2a (chst2a), mRNA [NM_001079995]	GO:0000139|GO:0005975|GO:0008146	NM_001079995	Dr.81182	561896	ENSDART00000138136	carbohydrate (N-acetylglucosamine-6-O) sulfotransferase 2a	NP13229010	157.935	733.577	7.71976	8.77308
A_15_P508747	-2.46417	-1.3011	2.46417	down	NM_200925	chr24:12995312-13005222	stau2	Danio rerio staufen, RNA binding protein, homolog 2 (Drosophila) (stau2), mRNA [NM_200925]	GO:0008354|GO:0003723|GO:0005874|GO:0006810|GO:0007281	NM_200925	Dr.75888	393899	ENSDART00000028832	staufen, RNA binding protein, homolog 2 (Drosophila)	TC423042	491.194	2352.31	9.21828	10.5194
A_15_P223426	-8.52558	-3.0918	8.52558	down	XM_002663262	chr8:55700895-55700954	magi1a	membrane associated guanylate kinase, WW and PDZ domain containing 1a [Source:ZFIN;Acc:ZDB-GENE-081105-13] [ENSDART00000102696]		XM_002663262		100319849	ENSDART00000102696	membrane associated guanylate kinase, WW and PDZ domain containing 1a	TC384302	7.28426	141.028	3.33218	6.42398
A_15_P331879	-8.31191	-3.05518	8.31191	down	NM_001115089	chr5:33944040-33943981	myhz1.1	Danio rerio myosin, heavy polypeptide 1.1, skeletal muscle (myhz1.1), transcript variant 1, mRNA [NM_001115089]	GO:0003774|GO:0000166|GO:0001757|GO:0003779|GO:0016459|GO:0005524	NM_001115089	Dr.104477	58142	ENSDART00000129660	myosin, heavy polypeptide 1.1, skeletal muscle	TC454031	417.464	6562.34	9.00732	12.0625
A_15_P145676	-3.06199	-1.61447	3.06199	down		chr5:17604034-17610520	hspb8	heat shock protein, alpha-crystallin-related, b8 [Source:ZFIN;Acc:ZDB-GENE-030131-2480] [ENSDART00000134206]	GO:0006950			791580	ENSDART00000134206	heat shock protein, alpha-crystallin-related, b8	TC418335	436.912	2632.16	9.0704	10.6849
A_15_P180971	-2.84805	-1.50998	2.84805	down	XM_005161265	chr21:24360765-24360824	dixdc1b	DIX domain containing 1b [Source:ZFIN;Acc:ZDB-GENE-041008-148] [ENSDART00000078651]	GO:0005622|GO:0007275|GO:0004871	XM_005161265		794716	ENSDART00000078651	DIX domain containing 1b	TC414553	17.4279	112.248	4.60171	6.11168
A_15_P346495	-2.51409	-1.33004	2.51409	down	NM_001113483	chr21:618848-618789	klf4a	Danio rerio Kruppel-like factor 4a (klf4a), mRNA [NM_001113483]	GO:0008285|GO:0003676|GO:0046872	NM_001113483	Dr.82009	562155	ENSDART00000110297	Kruppel-like factor 4a	TC370609	5	21.8166	2.40516	3.7352
A_15_P491952	-2.83854	-1.50515	2.83854	down	XM_005155654	chr10:17075739-17075680		GB		XM_005155654					NP13321242	5	24.366	2.40516	3.91032
A_15_P486430	-13.9597	-3.8032	13.9597	down	NM_001033595	chr20:35083391-35083450	hnrnpub	Danio rerio heterogeneous nuclear ribonucleoprotein Ub (hnrnpub), mRNA [NM_001033595]	GO:0019013|GO:0030529|GO:0005634|GO:0003676|GO:0019012	NM_001033595	Dr.75178	334490	ENSDART00000122696	heterogeneous nuclear ribonucleoprotein Ub	TC448659	15.5464	509.896	4.43457	8.23777
A_15_P331464	-2.47149	-1.30538	2.47149	down	NM_131188	chr3:32953534-32953475	mylpfa	Danio rerio myosin light chain, phosphorylatable, fast skeletal muscle a (mylpfa), mRNA [NM_131188]	GO:0005509	NM_131188	Dr.75115	30429	ENSDART00000075465	myosin light chain, phosphorylatable, fast skeletal muscle a	NP13228798	28667.5	94803.9	14.7819	16.0873
A_15_P116771	-3.58408	-1.8416	3.58408	down	NM_001044313	chr22:11897286-11897228	ptpn4b	Danio rerio protein tyrosine phosphatase, non-receptor type 4, b (ptpn4b), mRNA [NM_001044313]	GO:0008092|GO:0016791|GO:0005737|GO:0006470|GO:0016787|GO:0016311|GO:0004721|GO:0005856|GO:0004725|GO:0019898	NM_001044313	Dr.47843	407634	ENSDART00000000192	protein tyrosine phosphatase, non-receptor type 4, b	TC412503	10.2992	83.3075	3.84545	5.68705
A_15_P334924	-2.72324	-1.44532	2.72324	down	NM_001114551	chr9:26864411-26864470	zeb2a	Danio rerio zinc finger E-box binding homeobox 2a (zeb2a), transcript variant 1, mRNA [NM_001114551]	GO:0060028|GO:0060030|GO:0001756|GO:0040037|GO:0009953|GO:0003676|GO:0090243|GO:0014029|GO:0046872	NM_001114551	Dr.67155	100003889	ENSDART00000090028	zinc finger E-box binding homeobox 2a	TC411304	21.3684	133.569	4.90348	6.3488
A_15_P239496	-2.6672	-1.41533	2.6672	down	NM_001080184	chr23:36350854-36350795	cbx5	Danio rerio chromobox homolog 5 (HP1 alpha homolog, Drosophila) (cbx5), mRNA [NM_001080184]	GO:0005634	NM_001080184	Dr.104817	563396	ENSDART00000147598	chromobox homolog 5 (HP1 alpha homolog, Drosophila)	NP13225930	2268.78	9520.75	11.1902	12.6055
A_15_P556077	-3.60655	-1.85062	3.60655	down	CT660052	chr23:25508485-25508544		WNK lysine deficient protein kinase 3 [Source:HGNC Symbol;Acc:14543] [ENSDART00000035702]		XM_690703	Dr.152361		ENSDART00000035702		TC440345	95.2402	786.322	7.02417	8.87479
A_15_P108277	-2.07104	-1.05036	2.07104	down	NM_001128351	chr13:24328291-24328232	galnt2	Danio rerio UDP-N-acetyl-alpha-D-galactosamine:polypeptide N-acetylgalactosaminyltransferase 2 (galnt2), mRNA [NM_001128351]	GO:0005794|GO:0016020|GO:0016757|GO:0006486|GO:0016021|GO:0016740	NM_001128351	Dr.83159	570248	ENSDART00000136217	UDP-N-acetyl-alpha-D-galactosamine:polypeptide N-acetylgalactosaminyltransferase 2	TC390693	19.9474	93.9603	4.80167	5.85202
A_15_P115914	-2.53226	-1.34043	2.53226	down	NM_001077775	chr17:27011013-27011072	rps6ka1	Danio rerio ribosomal protein S6 kinase a, polypeptide 1 (rps6ka1), mRNA [NM_001077775]	GO:0016310|GO:0004672|GO:0000287|GO:0000166|GO:0016301|GO:0004674|GO:0006468|GO:0005524|GO:0016740|GO:0007243|GO:0016772	NM_001077775	Dr.104270	777728	ENSDART00000044378	ribosomal protein S6 kinase a, polypeptide 1	TC369692	44.7155	266.991	5.96858	7.309
A_15_P651952	-2.07388	-1.05233	2.07388	down	NM_001128355	chr4:46424754-46424813	LOC794656	Danio rerio novel NACHT domain containing protein (LOC794656), mRNA [NM_001128355]		NM_001128355	Dr.148325	794656	ENSDART00000108511	novel NACHT domain containing protein	NP13326307	107.962	514.063	7.19665	8.24898
A_15_P613392	-4.78512	-2.25856	4.78512	down	CK691226	chr5:69672130-69672071	mn1b	meningioma 1b [Source:ZFIN;Acc:ZDB-GENE-080917-23] [ENSDART00000129197]	GO:0008150|GO:0003674|GO:0005575	XM_001919740	Dr.53875	572077	ENSDART00000129197	meningioma 1b	TC387163	67.3773	750.393	6.54409	8.80264
A_15_P627396	-2.13767	-1.09604	2.13767	down	NM_131079	chr6:36330698-36330639	her6	Danio rerio hairy-related 6 (her6), mRNA [NM_131079]	GO:0021794|GO:0006355|GO:0007219|GO:0001757|GO:0045664|GO:0046983|GO:0005634|GO:0009952|GO:0003677|GO:0006351	NM_131079	Dr.75065	30288	ENSDART00000135413	hairy-related 6	TC428895	2643.17	8745.88	11.3895	12.4856
A_15_P189341	-2.14598	-1.10163	2.14598	down	XM_005166953	chr8:22907678-22907619	cep104	centrosomal protein 104 [Source:ZFIN;Acc:ZDB-GENE-060503-195] [ENSDART00000084965]		XM_005166953		560451	ENSDART00000084965	centrosomal protein 104	NP9494176	11.4611	54.68	3.99519	5.09682
A_15_P440760	-2.1745	-1.12068	2.1745	down	XM_005174362	chr25:17041341-17041400		cat eye syndrome chromosome region, candidate 2 [Source:HGNC Symbol;Acc:1840] [ENSDART00000110426]		XM_005174362			ENSDART00000110426		NP13315545	16.6702	81.2507	4.53223	5.65291
A_15_P154507	-2.45241	-1.2942	2.45241	down	NM_213219	chr1:60324950-60325009	akap8l	Danio rerio A kinase (PRKA) anchor protein 8-like (akap8l), mRNA [NM_213219]	GO:0016310|GO:0016301|GO:0005634|GO:0003677|GO:0016740	NM_213219	Dr.105980	406500	ENSDART00000126152	A kinase (PRKA) anchor protein 8-like	TC422849	88.4832	502.196	6.92113	8.21534
A_15_P107994	-2.00077	-1.00055	2.00077	down	NM_001080203	chr24:28654749-28654690	hs6st1b	Danio rerio heparan sulfate 6-O-sulfotransferase 1b (hs6st1b), mRNA [NM_001080203]	GO:0016020|GO:0008146|GO:0016021|GO:0016740	NM_001080203	Dr.152020	791107	ENSDART00000105778	heparan sulfate 6-O-sulfotransferase 1b	TC375454	51.8888	242.89	6.17447	7.17502
A_15_P550017	-3.61595	-1.85437	3.61595	down	NM_001128812	chr19:196595-196654	tmem65	Danio rerio transmembrane protein 65 (tmem65), mRNA [NM_001128812]	GO:0008150|GO:0003674|GO:0005575	NM_001128812	Dr.51942	100005403	ENSDART00000111580	transmembrane protein 65	TC388893	17.5824	145.625	4.61616	6.47053
A_15_P580942	-2.11412	-1.08006	2.11412	down	NM_001002072	chr10:3164433-3164487	ube2l3a	Danio rerio ubiquitin-conjugating enzyme E2L 3a (ube2l3a), mRNA [NM_001002072]	GO:0016881|GO:0016874|GO:0005575	NM_001002072	Dr.33023	415162	ENSDART00000028870	ubiquitin-conjugating enzyme E2L 3a	TC456853	3787.82	12053.9	11.8719	12.952
A_15_P737436	-2.74779	-1.45827	2.74779	down	NM_001080008	chr11:18634916-18634857	zgc:153972	Danio rerio zgc:153972 (zgc:153972), mRNA [NM_001080008]	GO:0008150|GO:0003674|GO:0005575	NM_001080008	Dr.80030	563581	ENSDART00000086437	zgc:153972	TC403058	28.8525	184.054	5.33566	6.79393
A_15_P667826	-2.2605	-1.17664	2.2605	down	BC142880	chr23:25740276-25740217	LOC565797	Danio rerio similar to alpha-2-macroglobulin receptor, mRNA (cDNA clone IMAGE:7923309), partial cds. [BC142880]		XM_005162219	Dr.105708	565797	ENSDART00000088208	low-density lipoprotein receptor-related protein 1-like	TC373877	596.826	2571.8	9.47683	10.6535
A_15_P100369	-4.12292	-2.04367	4.12292	down	NM_001044996	chr22:22714317-22714258	camsap2	Danio rerio calmodulin regulated spectrin-associated protein family, member 2 (camsap2), mRNA [NM_001044996]	GO:0008017	NM_001044996	Dr.108349	562741	ENSDART00000089569	calmodulin regulated spectrin-associated protein family, member 2	TC416842	6.71069	61.2365	3.2142	5.25787
A_15_P103702	-2.71392	-1.44038	2.71392	down	BC154648	chr10:25142267-25142208	smpd1	sphingomyelin phosphodiesterase 1, acid lysosomal [Source:ZFIN;Acc:ZDB-GENE-110411-222] [ENSDART00000114277]	GO:0006685|GO:0016787|GO:0004767	XM_678815	Dr.116676	556700	ENSDART00000114277	sphingomyelin phosphodiesterase 1, acid lysosomal	TC372584	55.5479	351.718	6.26445	7.70483
A_15_P637196	-7.99298	-2.99873	7.99298	down	NM_201336	chr22:38072578-38072519	pfn2	Danio rerio profilin 2 (pfn2), mRNA [NM_201336]	GO:0030036|GO:0003779	NM_201336	Dr.76326	394235	ENSDART00000104687	profilin 2	NP13229090	75.0691	1372.01	6.69908	9.69782
A_15_P753008	-4.55736	-2.1882	4.55736	down	NM_201492	chr19:11504919-11504860	tpm3	Danio rerio tropomyosin 3 (tpm3), transcript variant 2, mRNA [NM_201492]		NM_201492	Dr.33255	373076	ENSDART00000010997	tropomyosin 3	TC446565	943.943	7401.32	10.0541	12.2423
A_15_P157981	-2.29923	-1.20115	2.29923	down	NM_212703	chr10:30670891-30670950	hyou1	Danio rerio hypoxia up-regulated 1 (hyou1), mRNA [NM_212703]	GO:0000166|GO:0005783|GO:0005788|GO:0005524	NM_212703	Dr.76183	327133	ENSDART00000100032	hypoxia up-regulated 1	TC382404	205.371	1036.14	8.07343	9.27458
A_15_P165846	-4.86471	-2.28235	4.86471	down	EB787099	chr15:38267051-38266992		tol2 transposon-derived gene trap locus 4A [Source:ZFIN;Acc:ZDB-GENE-040723-4] [ENSDART00000142719]		XR_222306	Dr.92207		ENSDART00000142719		TC446935	5	41.2319	2.40516	4.68752
A_15_P758016	-2.47335	-1.30646	2.47335	down		chr21:24250963-24250904		GB							NP13326121	30.7461	175.008	5.42163	6.72809
A_15_P284926	-3.42227	-1.77495	3.42227	down	NM_213318	chr13:3896041-3895554	ppp2r5d	Danio rerio protein phosphatase 2, regulatory subunit B', delta (ppp2r5d), mRNA [NM_213318]	GO:0007165|GO:0008601|GO:0000159	NM_213318	Dr.78222	406610	ENSDART00000102694	protein phosphatase 2, regulatory subunit B', delta	TC434031	43.9476	356.056	5.94634	7.72129
A_15_P487615	-2.19685	-1.13544	2.19685	down	NM_212581	chr13:36292352-36291916	tacc3	Danio rerio transforming, acidic coiled-coil containing protein 3 (tacc3), mRNA [NM_212581]	GO:0008150|GO:0003674	NM_212581	Dr.78713	321283	ENSDART00000145884	transforming, acidic coiled-coil containing protein 3	TC435669	147.132	725.097	7.62091	8.75634
A_15_P542873	-2.15749	-1.10935	2.15749	down	NM_001006043	chr6:49723295-49723354	ctsz	Danio rerio cathepsin Z (ctsz), mRNA [NM_001006043]	GO:0006508|GO:0008234|GO:0001525	NM_001006043	Dr.935	450022	ENSDART00000063251	cathepsin Z	TC400178	18.9306	93.0191	4.73013	5.83948
A_15_P333874	-3.15566	-1.65794	3.15566	down	NM_200645	chr17:23755133-23757767	pex13	Danio rerio peroxisome biogenesis factor 13 (pex13), mRNA [NM_200645]	GO:0016560|GO:0016021|GO:0005777	NM_200645	Dr.118851	393618	ENSDART00000021177	peroxisome biogenesis factor 13	TC451717	12.8739	91.6193	4.16021	5.81815
A_15_P423115	-6.56077	-2.71387	6.56077	down	XM_685467	chr7:44241484-44241425		nuclear transcription factor, X-box binding 1 [Source:HGNC Symbol;Acc:7803] [ENSDART00000108742]		XM_685467			ENSDART00000108742		TC436018	12.936	196.273	4.16904	6.88291
A_15_P192916	-2.24668	-1.16779	2.24668	down	NM_194402	chr8:20986481-20986540	mknk2b	Danio rerio MAP kinase-interacting serine/threonine kinase 2b (mknk2b), mRNA [NM_194402]	GO:0016310|GO:0004672|GO:0000166|GO:0016301|GO:0004674|GO:0006468|GO:0005524|GO:0016740|GO:0016772	NM_194402	Dr.76090	373121	ENSDART00000016422	MAP kinase-interacting serine/threonine kinase 2b	TC387913	40.9666	215.778	5.84138	7.00918
A_15_P111216	-3.07626	-1.62118	3.07626	down	NM_001089333	Zv9_NA995:13695-16405	slco1d1	Danio rerio solute carrier organic anion transporter family, member 1D1 (slco1d1), mRNA [NM_001089333]	GO:0005215|GO:0016020|GO:0006810	NM_001089333	Dr.9025	326845	ENSDART00000084568	solute carrier organic anion transporter family, member 1D1	TC367784	20.1984	142.76	4.81879	6.43997
A_15_P139991	-2.01004	-1.00723	2.01004	down	NM_001100018	chr19:8554345-8554404	si:dkey-266f7.4	Danio rerio si:dkey-266f7.4 (si:dkey-266f7.4), mRNA [NM_001100018]		NM_001100018	Dr.119278	565661	ENSDART00000147015	si:dkey-266f7.4	TC387595	97.837	452.814	7.0593	8.06653
A_15_P147101	-4.78424	-2.25829	4.78424	down	NM_001113613	chr5:42725309-42725250	mtmr12	Danio rerio myotubularin related protein 12 (mtmr12), mRNA [NM_001113613]	GO:0048741|GO:0007626	NM_001113613	Dr.87790	569130	ENSDART00000083561	myotubularin related protein 12	TC448403	14.2758	156.126	4.30512	6.56341
A_15_P417630	-2.77243	-1.47115	2.77243	down	XM_001924009	chr10:26214829-26214770		T-cell lymphoma invasion and metastasis 1a [Source:ZFIN;Acc:ZDB-GENE-080325-1] [ENSDART00000143978]		XM_001924009			ENSDART00000143978		TC410316	59.9263	390.917	6.37384	7.845
A_15_P761576	-4.56163	-2.18955	4.56163	down	NM_201161	chr19:12015454-12015395	sept7a	Danio rerio septin 7a (sept7a), mRNA [NM_201161]	GO:0031105|GO:0007049|GO:0000166|GO:0005525	NM_201161	Dr.150458	394136	ENSDART00000126747	septin 7a	TC374964	171.555	1711.09	7.83485	10.0244
A_15_P470425	-2.59331	-1.37479	2.59331	down	NM_001080588	chr6:13148943-13149002	ino80db	Danio rerio INO80 complex subunit Db (ino80db), mRNA [NM_001080588]	GO:0003674|GO:0006355|GO:0006281|GO:0006310|GO:0005634|GO:0006974|GO:0006351	NM_001080588	Dr.41014	563304	ENSDART00000089725	INO80 complex subunit Db	TC365752	5	22.4213	2.40516	3.77996
A_15_P659971	-2.72682	-1.44722	2.72682	down	NM_213250	chr12:34824676-34826341	csnk1db	Danio rerio casein kinase 1, delta b (csnk1db), mRNA [NM_213250]	GO:0016310|GO:0005737|GO:0004672|GO:0000166|GO:0016301|GO:0004674|GO:0006468|GO:0005634|GO:0016055|GO:0005524|GO:0016740|GO:0016772	NM_213250	Dr.76493	406533	ENSDART00000021491	casein kinase 1, delta b	NP13225672	247.22	1446.05	8.32296	9.77018
A_15_P513947	-2.05417	-1.03856	2.05417	down	NM_201290	chr21:40517984-40517925	cct6a	Danio rerio chaperonin containing TCP1, subunit 6A (zeta 1) (cct6a), mRNA [NM_201290]	GO:0005737|GO:0000166|GO:0006457|GO:0051082|GO:0044267|GO:0005524	NM_201290	Dr.6928	116994	ENSDART00000009484	chaperonin containing TCP1, subunit 6A (zeta 1)	TC430436	9781.18	28115	13.1749	14.2134
A_15_P715206	-3.88762	-1.95889	3.88762	down	NM_200103	chr3:18112014-18111818	kdelr2a	Danio rerio KDEL (Lys-Asp-Glu-Leu) endoplasmic reticulum protein retention receptor 2a (kdelr2a), mRNA [NM_200103]	GO:0046923|GO:0016020|GO:0005783|GO:0006810|GO:0005789|GO:0016021|GO:0006621|GO:0016192|GO:0015031	NM_200103	Dr.75191	373129	ENSDART00000027630	KDEL (Lys-Asp-Glu-Leu) endoplasmic reticulum protein retention receptor 2a	TC407298	893.916	6040.22	9.97725	11.9361
A_15_P659666	-3.36695	-1.75144	3.36695	down	NM_173236	chr19:31059851-31060233	hdac1	Danio rerio histone deacetylase 1 (hdac1), mRNA [NM_173236]	GO:0008285|GO:0048709|GO:0060042|GO:0005634|GO:0046970|GO:0032129|GO:0060028|GO:0050769|GO:0004407|GO:0016055|GO:0021903|GO:0046969|GO:0032041|GO:0016575|GO:0006355|GO:0030318|GO:0048565|GO:0060218|GO:0006351|GO:0031078|GO:0001889|GO:0021754|GO:0016787|GO:0031017|GO:0048263|GO:0001764|GO:0034739|GO:0016568	NM_173236	Dr.31752	192302	ENSDART00000148935	histone deacetylase 1	TC380610	3793.28	19005	11.8731	13.6246
A_15_P310866	-2.562	-1.35727	2.562	down	NM_001123052	chr5:56117595-56117536	erap2	Danio rerio endoplasmic reticulum aminopeptidase 2 (erap2), mRNA [NM_001123052]	GO:0006508|GO:0008270|GO:0005575|GO:0008237	NM_001123052	Dr.90318	100144556	ENSDART00000115372	endoplasmic reticulum aminopeptidase 2	TC366535	5	22.1911	2.40516	3.76243
A_15_P241231	-2.90876	-1.54041	2.90876	down	XM_002665439	chr19:204289-204230	LOC566513	zinc finger and BTB domain containing 22 [Source:HGNC Symbol;Acc:13085] [ENSDART00000011890]		XM_002665439		566513	ENSDART00000011890	zinc finger and BTB domain-containing protein 22-like		7.39358	47.8056	3.35337	4.89378
A_15_P258591	-4.21724	-2.0763	4.21724	down	NM_200177	chr23:19882751-19882910	slmapb	Danio rerio sarcolemma associated protein b (slmapb), mRNA [NM_200177]		NM_200177	Dr.81986	393146	ENSDART00000021231	sarcolemma associated protein b	TC409793	5.37215	51.028	2.91744	4.99374
A_15_P645791	-3.43359	-1.77972	3.43359	down	NM_152886	chr9:36004449-36004137	appb	Danio rerio amyloid beta (A4) precursor protein b (appb), mRNA [NM_152886]	GO:0005515|GO:0060026|GO:0004867|GO:0046914|GO:0016021|GO:0007409|GO:0007417|GO:0008201|GO:0031175	NM_152886	Dr.2615	170846	ENSDART00000100684	amyloid beta (A4) precursor protein b	TC370213	87.9745	694.477	6.91338	8.6931
A_15_P100061	-2.1378	-1.09613	2.1378	down	NM_001162531	chr16:31075289-31075230	syt11b	Danio rerio synaptotagmin XIb (syt11b), mRNA [NM_001162531]	GO:0005215|GO:0016020|GO:0006810|GO:0008021	NM_001162531	Dr.87202	794707	ENSDART00000078543	synaptotagmin XIb	TC372278	5	18.7505	2.40516	3.50129
A_15_P503352	-2.40911	-1.2685	2.40911	down	NM_199614	chr16:27917104-27917045	tomm40	Danio rerio translocase of outer mitochondrial membrane 40 homolog (yeast) (tomm40), mRNA [NM_199614]	GO:0005741|GO:0055085	NM_199614	Dr.75289	322645	ENSDART00000140539	translocase of outer mitochondrial membrane 40 homolog (yeast)	TC455953	570.663	2631.85	9.41615	10.6846
A_15_P154371	-2.08475	-1.05987	2.08475	down	NM_001130818	chr22:11564605-11564546	tspan7b	Danio rerio tetraspanin 7b (tspan7b), mRNA [NM_001130818]	GO:0008150|GO:0003674|GO:0016020|GO:0016021	NM_001130818	Dr.75943	449539	ENSDART00000002691	tetraspanin 7b	TC392294	142.601	669.153	7.57884	8.63871
A_15_P445705	-2.33542	-1.22368	2.33542	down	XM_005169417	chr11:43815958-43815899	LOC100331538	Uncharacterized protein [Source:UniProtKB/TrEMBL;Acc:F1QLT8] [ENSDART00000076733]		XM_005169417		100331538	ENSDART00000076733	uncharacterized LOC100331538	TC409800	20.0986	106.303	4.81148	6.03516
A_15_P736416	-2.08954	-1.06318	2.08954	down		chr16:36401743-36401802		AT rich interactive domain 1Aa (SWI-like) [Source:ZFIN;Acc:ZDB-GENE-080220-35] [ENSDART00000084263]					ENSDART00000084263		TC421364	726.46	2800.91	9.72384	10.787
A_15_P132411	-2.23631	-1.16112	2.23631	down	AJ311886	chr22:3372833-3372775	ptprsa	protein tyrosine phosphatase, receptor type, s, a [Source:ZFIN;Acc:ZDB-GENE-020107-3] [ENSDART00000145114]	GO:0016791|GO:0006470|GO:0021772|GO:0016787|GO:0016311|GO:0004721|GO:0004725	XM_001920918	Dr.75642	140820	ENSDART00000145114	protein tyrosine phosphatase, receptor type, s, a	TC419585	521.193	2270.84	9.29668	10.4578
A_15_P102209	-2.08827	-1.06231	2.08827	down	NM_205712	chr18:14930951-14930892	rfx4	Danio rerio regulatory factor X, 4 (rfx4), mRNA [NM_205712]	GO:0006355|GO:0005634|GO:0003677|GO:0006351	NM_205712	Dr.78441	403016	ENSDART00000031752	regulatory factor X, 4	TC366978	34.7141	166.406	5.59749	6.6598
A_15_P151961	-4.02685	-2.00965	4.02685	down	NM_131777	chr24:14327569-14330516	ncoa2	Danio rerio nuclear receptor coactivator 2 (ncoa2), mRNA [NM_131777]	GO:0006355|GO:0003713|GO:0035257|GO:0005634|GO:0007275|GO:0060215|GO:0009790|GO:0006351|GO:0046966|GO:0030375|GO:0007165|GO:0046983|GO:0030099|GO:0004871|GO:0030851|GO:0004402	NM_131777	Dr.132753	81884	ENSDART00000124181	nuclear receptor coactivator 2	TC365577	26.4959	252.167	5.21966	7.22931
A_15_P511972	-2.35223	-1.23403	2.35223	down	NM_001003648	chr7:53263571-53263630	slc38a7	Danio rerio solute carrier family 38, member 7 (slc38a7), mRNA [NM_001003648]	GO:0016020|GO:0006865|GO:0006810|GO:0016021|GO:0006814|GO:0006811	NM_001003648	Dr.33530	445254	ENSDART00000026571	solute carrier family 38, member 7	TC381967	147.312	776.755	7.62248	8.85651
A_15_P282401	-3.40785	-1.76886	3.40785	down	NM_001278802	chr12:37400116-37400175	kcnj2a	Danio rerio potassium inwardly-rectifying channel, subfamily J, member 2 (kcnj2), mRNA [NM_001278802]	GO:0005242|GO:0005244|GO:0016020|GO:0006810|GO:0034765|GO:0016021|GO:0006813|GO:0006811	NM_001278802		564522	ENSDART00000022533	potassium inwardly-rectifying channel, subfamily J, member 2a	NP13322292	5.16984	39.8741	2.86382	4.63269
A_15_P521037	-2.20902	-1.14341	2.20902	down	XM_684096	chr1:46213754-46213813		si:ch211-214c7.4 [Source:ZFIN;Acc:ZDB-GENE-030131-6275] [ENSDART00000101413]		XM_684096			ENSDART00000101413		TC366297	80.9457	419.244	6.80104	7.94445
A_15_P518657	-2.26896	-1.18203	2.26896	down		chr16:49570000-49570059		Rep: Predicted protein - Aspergillus oryzae, partial (8%) [TC416492]							TC416492	388.438	1789.1	8.90443	10.0865
A_15_P319421	-2.27738	-1.18737	2.27738	down	NM_001044871	chr18:14464920-14464861	selo	Danio rerio selenoprotein O (selo), mRNA [NM_001044871]		NM_001044871	Dr.8850	558648	ENSDART00000099701	selenoprotein O	TC381004	40.7983	217.44	5.83474	7.02211
A_15_P146616	-3.53338	-1.82105	3.53338	down	NM_001105279	chr5:41285781-41285722	prkg2	Danio rerio protein kinase, cGMP-dependent, type II (prkg2), mRNA [NM_001105279]	GO:0004672|GO:0004674|GO:0006468|GO:0004692|GO:0005524|GO:0016772	NM_001105279	Dr.126380	100125912	ENSDART00000076929	protein kinase, cGMP-dependent, type II	TC368870	5	30.0776	2.40516	4.22621
A_15_P167358	-2.76718	-1.46841	2.76718	down	BC083364	chr23:40254588-40254529	xcr1a	chemokine (C motif) receptor 1 [Source:ZFIN;Acc:ZDB-GENE-070302-6] [ENSDART00000077124]	GO:0007165|GO:0016020|GO:0007186|GO:0006935|GO:0004930|GO:0004950|GO:0016021|GO:0004871	XM_001332312	Dr.120435	553500	ENSDART00000077124	chemokine (C motif) receptor 1	TC376079	7.71112	47.6675	3.42144	4.88986
A_15_P104488	-7.62252	-2.93027	7.62252	down	NM_001045085	chr18:21643248-21643189	edc4	Danio rerio enhancer of mRNA decapping 4 (edc4), mRNA [NM_001045085]	GO:0005737|GO:0000932|GO:0005634	NM_001045085	Dr.106523	565659	ENSDART00000132381	enhancer of mRNA decapping 4	TC382093	74.9962	1308.87	6.69715	9.62742
A_15_P138576	-2.55658	-1.35422	2.55658	down	NM_198142	chr22:19166452-19166645	bsg	Danio rerio basigin (bsg), mRNA [NM_198142]	GO:0016020	NM_198142	Dr.2447	337692	ENSDART00000015951	basigin	NP9495900	1125.93	4921.11	10.2816	11.6358
A_15_P590927	-2.36158	-1.23975	2.36158	down	NM_001111281	chr3:53856161-53856399	brd4	Danio rerio bromodomain containing 4 (brd4), mRNA [NM_001111281]	GO:0000793|GO:0006355|GO:0005694|GO:0050727|GO:0005634|GO:0006351|GO:0002039|GO:0042393|GO:0003682|GO:0045944|GO:0032968|GO:0070577|GO:0043123|GO:0016568	NM_001111281	Dr.104897	570531	ENSDART00000115117	bromodomain containing 4	TC399540	132.607	709.303	7.4851	8.72485
A_15_P565117	-2.05337	-1.03799	2.05337	down	NM_001080625	chr3:26867009-26867883	rabep2	Danio rerio rabaptin, RAB GTPase binding effector protein 2 (rabep2), mRNA [NM_001080625]	GO:0008083|GO:0005096	NM_001080625	Dr.84154	791143	ENSDART00000087064	rabaptin, RAB GTPase binding effector protein 2	TC367490	5718.26	17256.5	12.4333	13.4713
A_15_P132816	-2.27036	-1.18292	2.27036	down	NM_213141	chr18:14848692-14848633	zgc:64098	Danio rerio zgc:64098 (zgc:64098), mRNA [NM_213141]	GO:0008150|GO:0003674|GO:0016020|GO:0016021	NM_213141	Dr.76394	406415	ENSDART00000048206	zgc:64098	TC401137	1600.06	5930.78	10.726	11.9089
A_15_P648066	-7.60442	-2.92684	7.60442	down	BC129326	chr2:50185885-50185826		cactin [Source:ZFIN;Acc:ZDB-GENE-060503-322] [ENSDART00000083710]		XM_005168432	Dr.114063		ENSDART00000083710		TC372558	7.68161	132.619	3.41501	6.34185
A_15_P564872	-2.4962	-1.31973	2.4962	down	NM_001083546	chr12:32494802-32494861	aldh18a1	Danio rerio aldehyde dehydrogenase 18 family, member A1 (aldh18a1), nuclear gene encoding mitochondrial protein, mRNA [NM_001083546]	GO:0005737|GO:0004350|GO:0016620|GO:0008152|GO:0016491|GO:0006561|GO:0004349|GO:0003824|GO:0016740|GO:0055114	NM_001083546	Dr.76195	557186	ENSDART00000142988	aldehyde dehydrogenase 18 family, member A1	TC421143	41.1563	241.619	5.84873	7.16846
A_15_P624476	-2.01996	-1.01433	2.01996	down	NM_001083097	chr20:37778528-37778469	adat2	Danio rerio adenosine deaminase, tRNA-specific 2, TAD2 homolog (S. cerevisiae) (adat2), mRNA [NM_001083097]	GO:0016787|GO:0008270|GO:0003824|GO:0046872|GO:0008033	NM_001083097	Dr.89926	100034610	ENSDART00000061473	adenosine deaminase, tRNA-specific 2, TAD2 homolog (S. cerevisiae)	TC386360	41.6495	196.097	5.86753	6.88186
A_15_P235111	-3.34172	-1.74059	3.34172	down	XM_003201065	chr22:23335507-23333076	LOC566697	leprecan-like 1 [Source:ZFIN;Acc:ZDB-GENE-061207-44] [ENSDART00000089827]		XM_003201065		566697	ENSDART00000089827	novel protein similar to vertebrate leprecan-like 1 (LEPREL1)	TC372563	15.429	116.738	4.4237	6.16429
A_15_P334669	-3.3648	-1.75052	3.3648	down	XM_001920979	chr13:205331-205390	si:zfos-1762d12.1	si:zfos-1762d12.1 [Source:ZFIN;Acc:ZDB-GENE-030131-1188] [ENSDART00000099131]	GO:0016758	XM_001920979		322468	ENSDART00000099131	si:zfos-1762d12.1	TC452114	11.7183	89.1199	4.02506	5.77558
A_15_P463035	-2.39832	-1.26203	2.39832	down	NM_212595	chr19:32248802-32248743	rbb4	Danio rerio retinoblastoma binding protein 4 (rbb4), mRNA [NM_212595]	GO:0006260|GO:0007049|GO:0006355|GO:0035098|GO:0033186|GO:0031497|GO:0006338|GO:0005634|GO:0006351|GO:0016568|GO:0008094	NM_212595	Dr.76462	321726	ENSDART00000130326	retinoblastoma binding protein 4	NP13225380	2753.17	10234.5	11.4448	12.7068
A_15_P121314	-2.36201	-1.24002	2.36201	down	BC085572	chr24:33187879-33187820	rsu1	Ras suppressor protein 1 [Source:ZFIN;Acc:ZDB-GENE-030616-518] [ENSDART00000136731]		XM_002666676	Dr.79447	553276	ENSDART00000136731	Ras suppressor protein 1	TC378886	16.8193	89.8256	4.54649	5.7865
A_15_P435870	-2.95599	-1.56364	2.95599	down	NM_214724	chr1:41604175-41604116	rgs12b	Danio rerio regulator of G-protein signaling 12b (rgs12b), mRNA [NM_214724]	GO:0043547|GO:0007165|GO:0005737|GO:0005886|GO:0038032|GO:0005057|GO:0030695|GO:0005096	NM_214724	Dr.84135	378970	ENSDART00000134739	regulator of G-protein signaling 12b	NP919843	32.7657	226.764	5.51819	7.08183
A_15_P515377	-2.97487	-1.57283	2.97487	down	NM_001004295	chr23:18733080-18733021	sps2	Danio rerio selenophosphate synthetase 2 (sps2), mRNA [NM_001004295]	GO:0016310|GO:0016301|GO:0004756|GO:0003824|GO:0005524|GO:0016740	NM_001004295	Dr.107753	352933	ENSDART00000004655	selenophosphate synthetase 2	TC386418	729.919	3928.72	9.72905	11.3019
A_15_P150126	-2.84862	-1.51026	2.84862	down	NM_131669	chr23:45576466-45576407	atp1b2a	Danio rerio ATPase, Na+/K+ transporting, beta 2a polypeptide (atp1b2a), mRNA [NM_131669]	GO:0016020|GO:0006810|GO:0016021|GO:0006814|GO:0005890|GO:0006813|GO:0006811	NM_131669	Dr.77891	64269	ENSDART00000089402	ATPase, Na+/K+ transporting, beta 2a polypeptide	TC406748	128.418	827.789	7.43692	8.94718
A_15_P578187	-2.0605	-1.04299	2.0605	down	NM_201993	chr15:17055532-17055473	arcn1b	Danio rerio archain 1b (arcn1b), mRNA [NM_201993]	GO:0030131|GO:0030126|GO:0006890|GO:0006810|GO:0016192|GO:0006886	NM_201993	Dr.75156	399661	ENSDART00000047902	archain 1b	TC395991	622.012	2433.34	9.52455	10.5675
A_15_P281626	-2.9091	-1.54057	2.9091	down	NM_212634	chr15:18836730-18836921	alcamb	Danio rerio activated leukocyte cell adhesion molecule b (alcamb), mRNA [NM_212634]	GO:0031290|GO:0030424|GO:0016020|GO:0060385|GO:0021885|GO:0016021|GO:0042802	NM_212634	Dr.105054	323919	ENSDART00000101204	activated leukocyte cell adhesion molecule b	TC414726	1035.95	5192.98	10.1743	11.7149
A_15_P195596	-2.02517	-1.01804	2.02517	down	NM_214716	chr21:41543711-41543652	hspa4a	Danio rerio heat shock protein 4a (hspa4a), mRNA [NM_214716]	GO:0000166|GO:0006950|GO:0005524	NM_214716	Dr.78661	335865	ENSDART00000021037	heat shock protein 4a	TC426966	3460.24	10681	11.754	12.7721
A_15_P708926	-18.7298	-4.22726	18.7298	down	NM_001077580	chr21:10321108-10321167	dcaf12	Danio rerio DDB1 and CUL4 associated factor 12 (dcaf12), mRNA [NM_001077580]	GO:0003674|GO:0005737|GO:0016567|GO:0005815|GO:0080008|GO:0005856	NM_001077580	Dr.108520	570671	ENSDART00000092015	DDB1 and CUL4 associated factor 12	TC424887	5	163.455	2.40516	6.63243
A_15_P535902	-2.07831	-1.05541	2.07831	down	NM_200234	chr7:51823600-51821548	prc1b	Danio rerio protein regulator of cytokinesis 1b (prc1b), mRNA [NM_200234]	GO:0008017|GO:0000910|GO:0000226|GO:0005575	NM_200234	Dr.81646	393203	ENSDART00000098824	protein regulator of cytokinesis 1b	TC449451	189.389	870.291	7.96427	9.01968
A_15_P750666	-2.36604	-1.24248	2.36604	down	NM_001105132	chr24:14464582-14464523	pabpn1	Danio rerio poly(A) binding protein, nuclear 1 (pabpn1), transcript variant 2, mRNA [NM_001105132]	GO:0000166|GO:0003676	NM_001105132	Dr.76617	406543		poly(A) binding protein, nuclear 1	TC407551	334.032	1633.96	8.71058	9.95306
A_15_P643496	-2.34603	-1.23022	2.34603	down	NM_205751	chr20:7050536-7040118	igfbp3	Danio rerio insulin-like growth factor binding protein 3 (igfbp3), mRNA [NM_205751]	GO:0042472|GO:0030916|GO:0031994|GO:0031995|GO:0005576|GO:0005634|GO:0001558|GO:0016942|GO:0060037|GO:0030514|GO:0001501|GO:0048009|GO:0005520	NM_205751	Dr.12583	403079	ENSDART00000020400	insulin-like growth factor binding protein 3	TC404377	26.2581	142.173	5.20565	6.43587
A_15_P145116	-2.06267	-1.04451	2.06267	down	NM_198825	chr7:30389422-30389481	fam60al	Danio rerio family with sequence similarity 60, member A, like (fam60al), mRNA [NM_198825]	GO:0008150|GO:0005575|GO:0003677	NM_198825	Dr.115762	386721	ENSDART00000112166	family with sequence similarity 60, member A, like	TC396579	568.494	2270.22	9.41245	10.457
A_15_P183491	-3.71432	-1.8931	3.71432	down	NM_001146149	chr23:21191157-21191216	pax7b	Danio rerio paired box gene 7b (pax7b), mRNA [NM_001146149]	GO:0043565|GO:0006355|GO:0003700|GO:0007275|GO:0005634|GO:0003677|GO:0006351	NM_001146149	Dr.134092	566533	ENSDART00000104288	paired box gene 7b	TC383485	30.2633	264.496	5.40098	7.29408
A_15_P756226	-3.5656	-1.83415	3.5656	down	NM_001017830	chr3:62058569-62056680	baiap2l1b	Danio rerio BAI1-associated protein 2-like 1b (baiap2l1b), mRNA [NM_001017830]	GO:0007165|GO:0017124|GO:0046847|GO:0008093	NM_001017830	Dr.108513	550528	ENSDART00000101957	BAI1-associated protein 2-like 1b	TC453337	7.45244	58.8397	3.36783	5.20198
A_15_P749571	-2.02778	-1.0199	2.02778	down	NM_131183	chr18:23656774-23656715	nr2f2	Danio rerio nuclear receptor subfamily 2, group F, member 2 (nr2f2), mRNA [NM_131183]	GO:0006355|GO:0003700|GO:0003707|GO:0005634|GO:0003677|GO:0006351|GO:0046872|GO:0043565|GO:0001946|GO:0060838|GO:0043401|GO:0008270|GO:0004879	NM_131183	Dr.77152	30424	ENSDART00000059976	nuclear receptor subfamily 2, group F, member 2	TC389341	574.348	2252.19	9.42409	10.444
A_15_P497367	-2.43632	-1.28471	2.43632	down	XM_001335706	chr1:675818-675877	LOC795531	Uncharacterized protein [Source:UniProtKB/TrEMBL;Acc:E7F5I6] [ENSDART00000124478]		XM_001335706	Dr.113398	795531	ENSDART00000124478	uncharacterized LOC795531	TC411591	20.1319	111.129	4.81319	6.0979
A_15_P108134	-3.14892	-1.65486	3.14892	down	NM_001025301	chr24:34976962-34974937	tmeff1b	Danio rerio transmembrane protein with EGF-like and two follistatin-like domains 1b (tmeff1b), mRNA [NM_001025301]	GO:0008150|GO:0003674	NM_001025301	Dr.106332	553511	ENSDART00000079283	transmembrane protein with EGF-like and two follistatin-like domains 1b	TC440812	1834.07	9265.23	10.9092	12.5641
A_15_P262321	-2.09701	-1.06834	2.09701	down		chr21:029726184-029726125										882.278	3285.07	9.96255	11.0309
A_15_P711996	-3.97442	-1.99074	3.97442	down	NM_001127477	chr21:41826559-41826500	mst4	Danio rerio serine/threonine protein kinase MST4 (mst4), mRNA [NM_001127477]	GO:0004672|GO:0000166|GO:0006468|GO:0005575|GO:0005524|GO:0016772	NM_001127477	Dr.79592	100151762	ENSDART00000085039	serine/threonine protein kinase MST4	TC366155	75.1938	694.295	6.70189	8.69263
A_15_P269536	-5.39117	-2.4306	5.39117	down	XM_005162454	chr23:37970831-37970889		si:ch211-231h20.2 [Source:ZFIN;Acc:ZDB-GENE-090313-94] [ENSDART00000121951]		XM_005162454			ENSDART00000121951		TC419175	5	45.8882	2.40516	4.83576
A_15_P362905	-3.01982	-1.59446	3.01982	down	NM_201022	chr7:31741477-31741536	lipca	Danio rerio lipase, hepatic a (lipca), mRNA [NM_201022]	GO:0006629|GO:0004806|GO:0016787|GO:0005576|GO:0003824	NM_201022	Dr.132354	393997	ENSDART00000129385	lipase, hepatic a	TC389680	5	25.8762	2.40516	3.99963
A_15_P185836	-3.09509	-1.62998	3.09509	down	DN898368	chr6:39634337-39634278		Integrin beta [Source:UniProtKB/TrEMBL;Acc:E7F4H9] [ENSDART00000065057]		XM_001337913	Dr.115362		ENSDART00000065057		NP9862303	11.5493	79.8877	4.00375	5.63373
A_15_P219036	-2.38895	-1.25638	2.38895	down	NM_173286	Zv9_scaffold3504:37755-37696	mib	Danio rerio mind bomb (mib), mRNA [NM_173286]	GO:0005515|GO:0004842|GO:0016874|GO:0001756|GO:0048793|GO:0021654|GO:0042803|GO:0009880|GO:0007507|GO:0031076|GO:0007219|GO:0002064|GO:0045747|GO:0045685|GO:0007275|GO:0048546|GO:0051865|GO:0043234|GO:0001885|GO:0007420|GO:0010001|GO:0008270|GO:0061195|GO:0021514|GO:0008284|GO:0007368|GO:0021536|GO:0021986|GO:0048471|GO:0016567|GO:0005886|GO:0021510|GO:0048699|GO:0048514|GO:0000151|GO:0030139|GO:…	NM_173286	Dr.124112	352910	ENSDART00000077966	mind bomb	TC382201	416.027	2003.32	9.00236	10.2587
A_15_P111099	-2.57389	-1.36395	2.57389	down	NM_001045215	chr18:39198380-39198321	foxg1c	Danio rerio forkhead box G1c (foxg1c), mRNA [NM_001045215]	GO:0005667|GO:0007389|GO:0006355|GO:0003700|GO:0006366|GO:0008301|GO:0003705|GO:0005634|GO:0000122|GO:0035058|GO:0009792|GO:0003677|GO:0006351|GO:0043565|GO:0051090|GO:0003690|GO:0045944|GO:0009888|GO:0008134	NM_001045215	Dr.154223	571323	ENSDART00000098868	forkhead box G1c	TC386154	5	22.2714	2.40516	3.76912
A_15_P434245	-2.58518	-1.37026	2.58518	down	NM_001044709	chr5:41069672-41069501	antxr2a	Danio rerio anthrax toxin receptor 2a (antxr2a), mRNA [NM_001044709]	GO:0005886|GO:0000132|GO:0030496|GO:0017048|GO:0004872|GO:0003779|GO:0030864|GO:0016021|GO:0032154|GO:0070938|GO:0005768	NM_001044709	Dr.12251	557239	ENSDART00000085359	anthrax toxin receptor 2a	TC413974	11.3355	65.2208	3.98141	5.35167
A_15_P119858	-2.98739	-1.57889	2.98739	down	CA473471	chr22:17674035-17674181	si:ch211-197g15.12	RAB GTPase activating protein 1-like [Source:HGNC Symbol;Acc:24663] [ENSDART00000088460]	GO:0032313|GO:0005097	XM_003201034	Dr.84833	555272	ENSDART00000088460	si:ch211-197g15.12	TC389111	93.8472	644.807	7.00291	8.5818
A_15_P106587	-2.6265	-1.39314	2.6265	down	NM_001018126	chr25:21319097-21319038	edc3	Danio rerio enhancer of mRNA decapping 3 homolog (S. cerevisiae) (edc3), mRNA [NM_001018126]	GO:0008150|GO:0005737|GO:0000932|GO:0003723	NM_001018126	Dr.120768	504054	ENSDART00000067373	enhancer of mRNA decapping 3 homolog (S. cerevisiae)	TC419079	45.9053	283.876	6.00281	7.39596
[truncated: 7,216 more rows]
